# Supplementary material for: Proteomics characterisation of the L929 cell supernatant and its role in BMDM differentiation
Source: PubMed Central journal article supplement (PMC8091624; doi:10.26508/lsa.202000957), 2021-04-14
Supplement: LSA-2020-00957_review_history.pdf [file LSA-2020-00957_review_history.pdf]

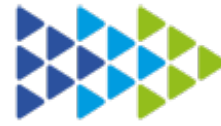

Life Science Alliance

# Proteomics characterisation of the L929 cell supernatant and its role in BMDM differentiation

Rachel Heap, José Luis Marin Rubio, Julien Peltier, Tiaan Heunis, Abeer Dannoura, Adam Moore, and Matthias Trost

DOI: <https://doi.org/10.26508/lsa.202000957>

*Corresponding author(s): Matthias Trost, Newcastle University*

---

## Review Timeline:

|                     |            |
|---------------------|------------|
| Submission Date:    | 2020-11-14 |
| Editorial Decision: | 2021-03-15 |
| Revision Received:  | 2021-03-31 |
| Accepted:           | 2021-04-07 |

---

*Scientific Editor: Shachi Bhatt*

## Transaction Report:

(Note: With the exception of the correction of typographical or spelling errors that could be a source of ambiguity, letters and reports are not edited. The original formatting of letters and referee reports may not be reflected in this compilation.)

March 15, 2021

RE: Life Science Alliance Manuscript #LSA-2020-00957

Prof. Matthias Trost  
Newcastle University  
ICAMB  
Framlington Place  
Newcastle-upon-Tyne NE24HH  
United Kingdom

Dear Dr. Trost,

Thank you for submitting your manuscript entitled "Proteomics characterisation of the L929 cell supernatant and its role in BMDM differentiation". We apologize for this extended and unusual delay in getting back to you.

As you will note from the reviewers' comments below, the reviewers are quite enthusiastic about these findings and have raised only minor concerns that need to be addressed in the revised manuscript. We would be happy to publish your paper in Life Science Alliance pending these final minor revisions requested by the referees and necessary to meet our formatting guidelines.

Along with the points listed below, please also attend to the following,

- please consult our manuscript preparation guidelines <https://www.life-science-alliance.org/manuscript-prep> and make sure your manuscript sections are in the correct order
- please add an Author Contributions section to your main manuscript text
- please upload your main and supplementary figures as single files
- please add callouts for Figures 1F, G, S3, and for Supplementary Table 2 to your main manuscript text
- please add your main, supplementary, and table legends to the main manuscript text after the references section

If you are planning a press release on your work, please inform us immediately to allow informing our production team and scheduling a release date.

To upload the final version of your manuscript, please log in to your account:

<https://lsa.msubmit.net/cgi-bin/main.plex>

You will be guided to complete the submission of your revised manuscript and to fill in all necessary information. Please get in touch in case you do not know or remember your login name.

To avoid unnecessary delays in the acceptance and publication of your paper, please read the following information carefully.

#### A. FINAL FILES:

These items are required for acceptance.

-- An editable version of the final text (.DOC or .DOCX) is needed for copyediting (no PDFs).

-- High-resolution figure, supplementary figure and video files uploaded as individual files: See our detailed guidelines for preparing your production-ready images, <https://www.life-science-alliance.org/authors>

-- Summary blurb (enter in submission system): A short text summarizing in a single sentence the study (max. 200 characters including spaces). This text is used in conjunction with the titles of papers, hence should be informative and complementary to the title. It should describe the context and significance of the findings for a general readership; it should be written in the present tense and refer to the work in the third person. Author names should not be mentioned.

## B. MANUSCRIPT ORGANIZATION AND FORMATTING:

Full guidelines are available on our Instructions for Authors page, <https://www.life-science-alliance.org/authors>

We encourage our authors to provide original source data, particularly uncropped/-processed electrophoretic blots and spreadsheets for the main figures of the manuscript. If you would like to add source data, we would welcome one PDF/Excel-file per figure for this information. These files will be linked online as supplementary "Source Data" files.

**\*\*Submission of a paper that does not conform to Life Science Alliance guidelines will delay the acceptance of your manuscript.\*\***

**\*\*It is Life Science Alliance policy that if requested, original data images must be made available to the editors. Failure to provide original images upon request will result in unavoidable delays in publication. Please ensure that you have access to all original data images prior to final submission.\*\***

**\*\*The license to publish form must be signed before your manuscript can be sent to production. A link to the electronic license to publish form will be sent to the corresponding author only. Please take a moment to check your funder requirements.\*\***

**\*\*Reviews, decision letters, and point-by-point responses associated with peer-review at Life Science Alliance will be published online, alongside the manuscript. If you do want to opt out of having the reviewer reports and your point-by-point responses displayed, please let us know immediately.\*\***

Thank you for your attention to these final processing requirements. Please revise and format the manuscript and upload materials within 7 days.

Thank you for this interesting contribution, we look forward to publishing your paper in Life Science Alliance.

Sincerely,

Shachi Bhatt, Ph.D.  
Executive Editor  
Life Science Alliance

<https://www.lsjournal.org/>

Tweet @SciBhatt @LSAJournal

Interested in an editorial career? EMBO Solutions is hiring a Scientific Editor to join the international Life Science Alliance team. Find out more here -

[https://www.embo.org/documents/jobs/Vacancy\\_Notice\\_Scientific\\_editor\\_LSA.pdf](https://www.embo.org/documents/jobs/Vacancy_Notice_Scientific_editor_LSA.pdf)

---

Reviewer #1 (Comments to the Authors (Required)):

The manuscript by Heap et al describes in-depth proteomic characterization of the L929 cell supernatant (secretome) used to differentiate macrophages from bone marrow followed by comparative proteomic analysis of bone marrow-derived macrophages using L929 secretome or M-CSF as the differentiating agent.

The authors identified more than 2000 proteins from L929 secretome and did additional bioinformatics analysis for these proteins. The data shows that there are many immune-regulatory proteins secreted and also point towards possible extracellular vesicle-mediated protein secretion. Following proteomic analysis of BMDMs upon three different differentiation process showed that L929 secretome induces slightly stronger anti-inflammatory M1 phenotype that those differentiated with M-CSF or M-CSF+MIF.

In general I think the manuscript is mostly well written and data is clearly presented, and the experiments are technically sound.

I have some comments that the authors should address in the revision:

Table1: what was the selection criteria for proteins to be included in this?

Suppl Table 1: the columns AA-AA show REF!, please correct

Fig 1B: 'extracellular exosome' is the main GO class for the proteins identified; is there any evidence on extracellular vesicles present in the secretome? This possibility should be at least discussed  
The numbers of identified and quantified proteins in the secretome and BMDM do not match in mat+met and results (e.g lines 231-232, 247 and 341-342 as well as 239 and 268-269), these should be corrected.

Fig 2B: are the up- and down-regulated proteins in the comparisons the same? That should be clearly shown; all the data in the rest of the figure is only from one comparison

The paragraph starting at line 368 and following paragraph (results in Fig 3A): the text is slightly confusing/difficult to follow and should be clarified

Reviewer #2 (Comments to the Authors (Required)):

Dear editor

Thanks for inviting me to evaluate this article entitled "Proteomics characterisation of the L929 cell supernatant and its role in BMDM differentiation".

In this paper, the researchers used quantitative mass spectrometry to characterise the kinetics of protein secretion from L929 cells over a two-week period. The results showed that there were a large number of M-CSF in LCCM and some of immune-regulatory proteins. In addition, macrophages differentiated with LCCM induced a stronger anti-inflammatory M1 phenotype. These results have

certain reference value.

The structure of the article is well arranged and the logic is clear. But here are a few mistakes in this manuscript that need to be fixed:

1.Line424: please change "may by phagocytosed" to "may be phagocytosed".

2.Line 450: "L929 differentiated BMDMs"

This expression is inconsistent with "I929-differentiated BMDMs" in line 447.

3.Line 454: This is also supported by the considerable higher number of BMDMs obtained

"This" is ambiguous.

4.Line 460: This indicates that M-CSF differentiated macrophages are possibly more dendritic cell-like.

"This" is ambiguous.

Response to reviewers:

We thank both reviewers for their positive reviews.

Reviewer #1 (Comments to the Authors (Required)):

Table1: what was the selection criteria for proteins to be included in this? - Added that "selected for known immunoregulatory functions"

Suppl Table 1: the columns AA-AA show REF!, please correct - Done

Fig 1B: 'extracellular exosome' is the main GO class for the proteins identified; is there any evidence on extracellular vesicles present in the secretome? This possibility should be at least discussed

The numbers of identified and quantified proteins in the secretome and BMDM do not match in mat+met and results (e.g lines 231-232, 247 and 341-342 as well as 239 and 268-269), these should be corrected. - Done

Fig 2B: are the up- and down-regulated proteins in the comparisons the same? That should be clearly shown; all the data in the rest of the figure is only from one comparison - the data in from pairwise comparisons between the different states. i.e. yes, they are the same. The comparison of M-CSF vs MCSF +MIF shows that there are virtually now differences.

The paragraph starting at line 368 and following paragraph (results in Fig 3A): the text is slightly confusing/difficult to follow and should be clarified – we slightly changed the text to make it more clear.

Reviewer #2 (Comments to the Authors (Required)):

1.Line424: please change "may by phagocytosed" to "may be phagocytosed". - Done

2.Line 450: "L929 differentiated BMDMs"

This expression is inconsistent with "I929-differentiated BMDMs" in line 447. - Done

3.Line 454: This is also supported by the considerable higher number of BMDMs obtained。

"This" is ambiguous. - Changed

4.Line 460: This indicates that M-CSF differentiated macrophages are possibly more dendritic cell-like.

"This" is ambiguous. - Changed

April 7, 2021

RE: Life Science Alliance Manuscript #LSA-2020-00957R

Prof. Matthias Trost  
Newcastle University  
ICAMB  
Framlington Place  
Newcastle-upon-Tyne NE24HH  
United Kingdom

Dear Dr. Trost,

Thank you for submitting your Resource entitled "Proteomics characterisation of the L929 cell supernatant and its role in BMDM differentiation". It is a pleasure to let you know that your manuscript is now accepted for publication in Life Science Alliance. Congratulations on this interesting work.

The final published version of your manuscript will be deposited by us to PubMed Central upon online publication.

Your manuscript will now progress through copyediting and proofing. It is journal policy that authors provide original data upon request.

Reviews, decision letters, and point-by-point responses associated with peer-review at Life Science Alliance will be published online, alongside the manuscript. If you do want to opt out of having the reviewer reports and your point-by-point responses displayed, please let us know immediately.

**\*\*\*IMPORTANT:** If you will be unreachable at any time, please provide us with the email address of an alternate author. Failure to respond to routine queries may lead to unavoidable delays in publication.\*\*\*

Scheduling details will be available from our production department. You will receive proofs shortly before the publication date. Only essential corrections can be made at the proof stage so if there are any minor final changes you wish to make to the manuscript, please let the journal office know now.

**DISTRIBUTION OF MATERIALS:**

Authors are required to distribute freely any materials used in experiments published in Life Science Alliance. Authors are encouraged to deposit materials used in their studies to the appropriate repositories for distribution to researchers.

You can contact the journal office with any questions, [contact@life-science-alliance.org](mailto:contact@life-science-alliance.org)

Again, congratulations on a very nice paper. I hope you found the review process to be constructive and are pleased with how the manuscript was handled editorially. We look forward to future exciting submissions from your lab.

Sincerely,

Shachi Bhatt, Ph.D.

Executive Editor

Life Science Alliance

<http://www.lsjournal.org>

Tweet @SciBhatt @LSAJournal
