# Supplementary material for: Proteomics characterisation of the L929 cell supernatant and its role in BMDM differentiation
Source: Life Sci Alliance. 2021 Apr 14;4(6):e202000957. doi: 10.26508/lsa.202000957 (PMC8091624; doi:10.26508/lsa.202000957)
Supplement: Supplementary file 1 [file LSA-2020-00957_TableS1.xlsx]

## Sheet: legend
Heap et al - Proteomics characterisation of the L929 cell supernatant and its role in BMDM differentiation
These excel sheets contain data from the secretome proteomics of L929 supernatant (LCCM)
Sheet "L929 secretome" contains all proteomics data ordered by IBAQ
Legend
Uniprot Accession	Uniprot Accession
Uniprot ID	Uniprot ID
Protein names	Protein names of identified proteins
Gene names	Gene name
Number of proteins	number of proteins identified in the protein group
Peptides	number of peptides identified
Razor + unique peptides	number of razor and unique peptides identified
Unique peptides	number of unique peptides identified
Score
Rank	Rank in the list accoring to iBAQ
iBAQ	combined iBAQ score
Log10 IBAQ	log10 of combined iBAQ score
Intensity	combined intensity
Log10 Intensity	log10 of combined intensity

## Sheet: L929 secretome
Uniprot Accession	Uniprot ID	Protein names	Gene names	Number of proteins	Peptides	Razor + unique peptides	Unique peptides	Score	Rank	iBAQ	Log10 IBAQ	Intensity	Log10 Intensity	Intensity 929_Sec_day10_1	Intensity 929_Sec_day10_2	Intensity 929_Sec_day10_3	Intensity 929_Sec_day14_1	Intensity 929_Sec_day14_2	Intensity 929_Sec_day14_3	Intensity 929_Sec_day3_1	Intensity 929_Sec_day3_2	Intensity 929_Sec_day3_3	Intensity 929_Sec_day7_1	Intensity 929_Sec_day7_2	Intensity 929_Sec_day7_3	Rank	iBAQ 929_Sec_day3_1	iBAQ 929_Sec_day3_2	iBAQ 929_Sec_day3_3	iBAQ 929_Sec_day7_1	iBAQ 929_Sec_day7_2	iBAQ 929_Sec_day7_3	iBAQ 929_Sec_day10_1	iBAQ 929_Sec_day10_2	iBAQ 929_Sec_day10_3	iBAQ 929_Sec_day14_1	iBAQ 929_Sec_day14_2	iBAQ 929_Sec_day14_3	LFQ intensity 929_Sec_day3_1	LFQ intensity 929_Sec_day3_2	LFQ intensity 929_Sec_day3_3	LFQ intensity 929_Sec_day7_1	LFQ intensity 929_Sec_day7_2	LFQ intensity 929_Sec_day7_3	LFQ intensity 929_Sec_day10_1	LFQ intensity 929_Sec_day10_2	LFQ intensity 929_Sec_day10_3	LFQ intensity 929_Sec_day14_1	LFQ intensity 929_Sec_day14_2
P60710	ACTB_MOUSE	Actin, cytoplasmic 1 (Beta-actin) [Cleaved into: Actin, cytoplasmic 1, N-terminally processed]	Actb	1	28	28	2	323.31	1	16791000000	10.2251	402980000000	11.6053	40753000000	34751000000	36562000000	17722000000	16982000000	13925000000	42569000000	40772000000	39561000000	38091000000	36104000000	43436000000	1	1773700000	1698800000	1648400000	1587100000	1504300000	1809800000	1698100000	1448000000	1523400000	738430000	707590000	580220000	1329400000	1179800000	1185700000	1098700000	1035100000	870260000	1032600000	970660000	1114700000	829940000	851670000
P11276	FINC_MOUSE	Fibronectin (FN) [Cleaved into: Anastellin]	Fn1	1	152	152	152	323.31	2	16000000000	10.2041	2096000000000	12.3214	310230000000	307810000000	256780000000	197940000000	155450000000	134540000000	46649000000	55956000000	55118000000	149350000000	184340000000	241780000000	2	356100000	427140000	420750000	1140100000	1407200000	1845600000	2368100000	2349700000	1960100000	1511000000	1186600000	1027000000	1082800000	1229600000	1305400000	6151800000	3493700000	3815600000	5999800000	5971400000	5328500000	11158000000	8959200000
P21460	CYTC_MOUSE	Cystatin-C (Cystatin-3)	Cst3	1	9	9	9	323.31	3	14176000000	10.1516	155940000000	11.193	21332000000	20658000000	19176000000	12882000000	13028000000	7085600000	4790600000	5592300000	4750100000	11323000000	12391000000	22932000000	3	435510000	508390000	431820000	1029400000	1126400000	2084800000	1939200000	1878000000	1743300000	1171100000	1184400000	644150000	136350000	153320000	151210000	322100000	315840000	440580000	496280000	490440000	479190000	665820000	643670000
P16045	LEG1_MOUSE	Galectin-1 (Gal-1) (14 kDa lectin) (Beta-galactoside-binding lectin L-14-I) (Galaptin) (Lactose-binding lectin 1) (Lectin galactoside-binding soluble 1) (S-Lac lectin 1)	Lgals1 Gbp	1	12	12	12	323.31	4	11953000000	10.0775	131480000000	11.1189	16160000000	15468000000	14547000000	6811700000	7422400000	4590000000	9044100000	9173800000	9199500000	11158000000	11750000000	16157000000	4	822190000	833980000	836320000	1014400000	1068100000	1468800000	1469100000	1406200000	1322500000	619240000	674760000	417270000	281940000	276620000	313040000	328790000	314450000	326780000	378220000	408830000	409060000	332580000	356680000
Q9DD06	RARR2_MOUSE	Retinoic acid receptor responder protein 2 (Chemerin)	Rarres2	1	17	17	17	323.31	5	11007000000	10.0417	121080000000	11.0831	14954000000	17989000000	14439000000	14885000000	9931400000	7989600000	1684100000	1641700000	1733700000	8115600000	11072000000	16641000000	5	153100000	149240000	157610000	737780000	1006600000	1512900000	1359400000	1635400000	1312700000	1353200000	902860000	726330000	54027000	55504000	67526000	225670000	302150000	368760000	395980000	525040000	427590000	687500000	466070000
P01887	B2MG_MOUSE	Beta-2-microglobulin	B2m	1	7	7	7	102.52	6	7626000000	9.8823	61008000000	10.7854	9643500000	7773100000	6339000000	6315700000	4736300000	2629500000	1684700000	1783200000	1790500000	5479200000	5480500000	7352300000	6	210590000	222900000	223810000	684900000	685070000	919040000	1205400000	971640000	792370000	789460000	592040000	328680000	45226000	50765000	50749000	112790000	101460000	156050000	236880000	189400000	145900000	226600000	199790000
P34884	MIF_MOUSE	Macrophage migration inhibitory factor (MIF) (EC 5.3.2.1) (Delayed early response protein 6) (DER6) (Glycosylation-inhibiting factor) (GIF) (L-dopachrome isomerase) (L-dopachrome tautomerase) (EC 5.3.3.12) (Phenylpyruvate tautomerase)	Mif	1	7	7	7	280.23	7	7067400000	9.84926	42404000000	10.6274	3652000000	3516200000	3321400000	4461200000	3797100000	2773800000	1649300000	1230600000	1384800000	4861700000	6204400000	5551700000	7	274880000	205100000	230800000	810290000	1034100000	925280000	608670000	586040000	553570000	743530000	632860000	462300000	55218000	44010000	44582000	114340000	152400000	150100000	135730000	105720000	137700000	177680000	156290000
P47879	IBP4_MOUSE	Insulin-like growth factor-binding protein 4 (IBP-4) (IGF-binding protein 4) (IGFBP-4)	Igfbp4 Igfbp-4	1	17	17	17	211.27	8	6477400000	9.8114	110120000000	11.0419	14980000000	14567000000	12770000000	3926700000	7681700000	4102100000	5638200000	6296100000	5611200000	8737000000	9230400000	16576000000	8	331660000	370360000	330070000	513940000	542970000	975050000	881160000	856870000	751190000	230980000	451860000	241300000	169750000	205860000	190640000	302760000	278630000	365980000	407000000	372550000	394110000	181440000	381210000
P10923	OSTP_MOUSE	Osteopontin (2AR) (Bone sialoprotein 1) (Calcium oxalate crystal growth inhibitor protein) (Early T-lymphocyte activation 1 protein) (Minopontin) (Secreted phosphoprotein 1) (SPP-1)	Spp1 Eta-1 Op Spp-1	1	9	9	9	117.38	9	5591000000	9.74749	83865000000	10.9236	10688000000	8081300000	6851700000	3290100000	7379800000	2719500000	6214600000	6635900000	5683600000	6763900000	8020700000	11536000000	9	414310000	442400000	378900000	450930000	534710000	769060000	712520000	538750000	456780000	219340000	491990000	181300000	191930000	185830000	175910000	235080000	214100000	252870000	281750000	243820000	237430000	154150000	407900000
P07091	S10A4_MOUSE	Protein S100-A4 (Metastasin) (Metastatic cell protein) (PEL98) (Placental calcium-binding protein) (Protein 18A2) (Protein Mts1) (S100 calcium-binding protein A4)	S100a4 Capl Mts1	1	7	7	7	175.82	10	5588300000	9.74728	33530000000	10.5254	1580800000	1932900000	1542800000	1668500000	2448200000	2470600000	2923200000	3277500000	2470700000	5071200000	3743400000	4400000000	10	487200000	546250000	411780000	845190000	623900000	733330000	263470000	322150000	257130000	278080000	408040000	411770000	111510000	105240000	92476000	145270000	109630000	99767000	51366000	79108000	63458000	79960000	114400000
Q61398	PCOC1_MOUSE	Procollagen C-endopeptidase enhancer 1 (P14) (Procollagen COOH-terminal proteinase enhancer 1) (PCPE-1) (Procollagen C-proteinase enhancer 1) (Type 1 procollagen C-proteinase enhancer protein) (Type I procollagen COOH-terminal proteinase enhancer)	Pcolce Pcpe1	1	28	28	28	323.31	11	5339000000	9.72746	149490000000	11.1746	19083000000	16716000000	15971000000	7408900000	10470000000	5929000000	7993400000	8551200000	8182100000	12466000000	13262000000	23459000000	11	285480000	305400000	292220000	445210000	473640000	837820000	681520000	597000000	570410000	264600000	373910000	211750000	256920000	261970000	270740000	396320000	359560000	463980000	476430000	467890000	428970000	328230000	454910000
P17742	PPIA_MOUSE	Peptidyl-prolyl cis-trans isomerase A (PPIase A) (EC 5.2.1.8) (Cyclophilin A) (Cyclosporin A-binding protein) (Rotamase A) (SP18) [Cleaved into: Peptidyl-prolyl cis-trans isomerase A, N-terminally processed]	Ppia	1	13	13	13	323.31	12	5281200000	9.72273	79219000000	10.8988	6709800000	7140500000	6523500000	1501100000	3681800000	1370100000	7862900000	6958800000	5785100000	8414800000	10553000000	12699000000	12	524190000	463920000	385670000	560990000	703550000	846630000	447320000	476030000	434900000	100070000	245460000	91343000	229790000	208280000	189580000	280740000	285580000	266570000	167140000	175090000	181020000	47552000	172670000
Q8BPB5	FBLN3_MOUSE	EGF-containing fibulin-like extracellular matrix protein 1 (Fibulin-3) (FIBL-3)	Efemp1 Fbln3	1	25	25	25	323.31	13	5145100000	9.71139	144060000000	11.1585	15770000000	16554000000	13445000000	8983500000	6350300000	6952400000	5591000000	5461300000	6363700000	15002000000	16910000000	26681000000	13	199680000	195050000	227270000	535790000	603930000	952890000	563210000	591200000	480180000	320840000	226790000	248300000	159960000	152700000	198400000	489700000	428490000	571280000	433300000	454980000	403790000	388890000	315700000
P05064	ALDOA_MOUSE	Fructose-bisphosphate aldolase A (EC 4.1.2.13) (Aldolase 1) (Muscle-type aldolase)	Aldoa Aldo1	1	32	32	30	323.31	14	5136900000	9.7107	143830000000	11.1578	13145000000	10740000000	10338000000	15722000000	10384000000	9041000000	3743500000	3897200000	2956800000	20969000000	19890000000	22127000000	14	133700000	139190000	105600000	748890000	710360000	790260000	469450000	383580000	369200000	561480000	370850000	322890000	106260000	118430000	100070000	602520000	523790000	406320000	314520000	271610000	280720000	651090000	449070000
P06151	LDHA_MOUSE	L-lactate dehydrogenase A chain (LDH-A) (EC 1.1.1.27) (LDH muscle subunit) (LDH-M)	Ldha Ldh-1 Ldh1	2	26	26	25	323.31	15	5033100000	9.70184	125830000000	11.0998	12503000000	12033000000	12013000000	13801000000	9956900000	8680900000	3345600000	3432500000	2832300000	13752000000	15077000000	18350000000	15	133820000	137300000	113290000	550070000	603060000	733990000	500110000	481320000	480520000	552040000	398280000	347230000	108900000	112070000	92972000	487740000	407660000	386280000	319970000	254600000	326020000	687900000	518140000
P97298	PEDF_MOUSE	Pigment epithelium-derived factor (PEDF) (Caspin) (Serpin F1) (Stromal cell-derived factor 3) (SDF-3)	Serpinf1 Pedf Sdf3	1	20	20	17	323.31	16	5016500000	9.7004	125410000000	11.0983	13064000000	13146000000	11283000000	5395200000	9881500000	5956500000	10753000000	11912000000	11081000000	9028700000	8018200000	15890000000	16	430110000	476470000	443250000	361150000	320730000	635590000	522550000	525830000	451320000	215810000	395260000	238260000	348090000	374060000	370290000	337830000	267430000	347780000	360590000	358590000	342680000	235660000	454170000
Q61147	CERU_MOUSE	Ceruloplasmin (EC 1.16.3.1) (Ferroxidase)	Cp	1	63	63	60	323.31	17	4696000000	9.67173	281760000000	11.4499	34371000000	38460000000	26511000000	8553900000	44328000000	17022000000	6305200000	7121900000	6658400000	23873000000	29403000000	39154000000	17	105090000	118700000	110970000	397890000	490060000	652570000	572850000	641010000	441840000	142560000	738810000	283700000	194350000	224300000	222730000	737100000	783830000	916210000	937710000	1122300000	825010000	384020000	2025800000
P47880	IBP6_MOUSE	Insulin-like growth factor-binding protein 6 (IBP-6) (IGF-binding protein 6) (IGFBP-6)	Igfbp6 Igfbp-6	1	13	13	13	323.31	18	4623400000	9.66496	64727000000	10.8111	7366800000	7044900000	6138400000	4794900000	4466900000	4075600000	4745300000	4973300000	4553500000	4438500000	5007900000	7113300000	18	338950000	355230000	325250000	317030000	357710000	508090000	526200000	503210000	438460000	342500000	319070000	291120000	154550000	165680000	159610000	138130000	139480000	179150000	211630000	227270000	205580000	195410000	198860000
Q06890	CLUS_MOUSE	Clusterin (Apolipoprotein J) (Apo-J) (Clustrin) (Sulfated glycoprotein 2) (SGP-2) [Cleaved into: Clusterin beta chain; Clusterin alpha chain]	Clu Apoj Msgp-2	1	29	29	29	323.31	19	4607700000	9.66348	124410000000	11.0949	18733000000	18216000000	15620000000	11731000000	15124000000	7985100000	847990000	973020000	999200000	8218100000	10486000000	15473000000	19	31407000	36038000	37007000	304380000	388370000	573070000	693820000	674670000	578530000	434480000	560150000	295750000	32959000	37576000	40183000	309800000	283220000	320300000	486670000	493270000	490420000	535320000	710910000
P17182	ENOA_MOUSE	Alpha-enolase (EC 4.2.1.11) (2-phospho-D-glycerate hydro-lyase) (Enolase 1) (Non-neural enolase) (NNE)	Eno1 Eno-1	1	33	33	27	323.31	20	4531000000	9.65619	144990000000	11.1613	13119000000	13023000000	13214000000	10572000000	8421800000	7421400000	7657700000	7282800000	6196000000	17450000000	18804000000	21748000000	20	239300000	227590000	193630000	545310000	587630000	679630000	409960000	406970000	412940000	330380000	263180000	231920000	225150000	214010000	206000000	572790000	527580000	455570000	346270000	317830000	386420000	433800000	386770000
Q9DBJ1	PGAM1_MOUSE	Phosphoglycerate mutase 1 (EC 5.4.2.11) (EC 5.4.2.4) (BPG-dependent PGAM 1) (Phosphoglycerate mutase isozyme B) (PGAM-B)	Pgam1	1	22	22	18	323.31	21	4080600000	9.61072	73451000000	10.866	7966800000	7821800000	7484600000	7129600000	5774900000	4427000000	1633200000	1679300000	1385700000	7949200000	8980500000	11190000000	21	90736000	93292000	76983000	441620000	498920000	621670000	442600000	434550000	415810000	396090000	320830000	245950000	29686000	45439000	28498000	257920000	248440000	234180000	200140000	192930000	202280000	371170000	290900000
Q02819	NUCB1_MOUSE	Nucleobindin-1 (CALNUC)	Nucb1 Nuc Nucb	1	44	44	44	323.31	22	3538600000	9.54883	127390000000	11.1051	13379000000	13196000000	10575000000	10505000000	14068000000	5006100000	8946500000	10560000000	9523700000	7683500000	9253000000	14694000000	22	248510000	293350000	264550000	213430000	257030000	408160000	371630000	366550000	293760000	291800000	390770000	139060000	281130000	322690000	316610000	249000000	248490000	344920000	385040000	371490000	340350000	450250000	642510000
Q01149	CO1A2_MOUSE	Collagen alpha-2(I) chain (Alpha-2 type I collagen)	Col1a2 Cola2	1	71	71	71	323.31	23	3316000000	9.52061	278540000000	11.4449	20794000000	15951000000	15382000000	8079800000	7548800000	4822300000	38268000000	45521000000	41487000000	19052000000	21519000000	40094000000	23	455570000	541920000	493890000	226810000	256170000	477310000	247550000	189900000	183120000	96188000	89866000	57408000	1508700000	1821300000	1674100000	528190000	510970000	857190000	337930000	266420000	289270000	149200000	168880000
Q8N7N5	DCAF8_MOUSE	DDB1- and CUL4-associated factor 8 (WD repeat-containing protein 42A)	Dcaf8 D1Ucla4 H326 Wdr42a	1	3	3	3	3.1588	24	3183200000	9.50286	124150000000	11.0939	20221000000	9919500000	8460800000	2742400000	7063900000	2409800000	10560000	12691000000	13115000000	3577400000	20937000000	22996000000	24	270770	325420000	336290000	91727000	536860000	589640000	518490000	254350000	216940000	70317000	181130000	61789000	0	0	0	129910000	0	0	0	0	0	0	0
O09164	SODE_MOUSE	Extracellular superoxide dismutase [Cu-Zn] (EC-SOD) (EC 1.15.1.1)	Sod3	1	13	13	13	323.31	25	3031500000	9.48166	42441000000	10.6278	4615000000	4410000000	3498300000	1075300000	3823900000	1263300000	3116400000	3707600000	3144600000	3420300000	3394100000	6972100000	25	222600000	264830000	224610000	244310000	242430000	498010000	329650000	315000000	249880000	76810000	273140000	90235000	100830000	118550000	112470000	92856000	98582000	155270000	117550000	105470000	92583000	51924000	197800000
Q640N1	AEBP1_MOUSE	Adipocyte enhancer-binding protein 1 (AE-binding protein 1) (Aortic carboxypeptidase-like protein)	Aebp1 Aclp	2	50	50	50	323.31	26	3025600000	9.48081	178510000000	11.2517	19809000000	21775000000	17651000000	21666000000	21710000000	13133000000	3992900000	4349800000	4241700000	13793000000	15669000000	20718000000	26	67676000	73725000	71894000	233780000	265570000	351160000	335740000	369060000	299170000	367230000	367960000	222600000	125920000	129810000	140040000	461650000	397580000	387920000	488490000	534110000	458610000	969430000	1044700000
Q921I1	TRFE_MOUSE	Serotransferrin (Transferrin) (Beta-1 metal-binding globulin) (Siderophilin)	Tf Trf	1	9	6	6	143.15	27	2960600000	9.47138	150990000000	11.1789	18652000000	17769000000	15182000000	2012300000	5980300000	1971000000	17844000000	15050000000	17911000000	4998000000	14669000000	18379000000	27	349890000	295090000	351190000	98000000	287620000	360370000	365720000	348420000	297680000	39457000	117260000	38647000	486400000	529690000	617550000	166320000	419550000	413000000	571300000	488500000	498560000	101390000	265440000
P62806	H4_MOUSE	Histone H4	Hist1h4a; Hist1h4b H4-53; Hist1h4c H4-12; Hist1h4d; Hist1h4f; Hist1h4h; Hist1h4i; Hist1h4j; Hist1h4k; Hist1h4m; Hist2h4a Hist2h4; Hist4h4	1	9	9	9	46.176	28	2931600000	9.4671	17590000000	10.2453	1392200000	1474700000	1514500000	3165000000	2120300000	669990000	1102300000	1313600000	1068500000	914340000	1141300000	1682400000	28	183720000	218930000	178080000	152390000	190220000	280390000	232040000	245780000	252420000	527500000	353390000	111670000	34311000	40001000	38141000	37760000	32212000	35359000	36054000	37752000	42673000	150610000	106400000
P07214	SPRC_MOUSE	SPARC (Basement-membrane protein 40) (BM-40) (Osteonectin) (ON) (Secreted protein acidic and rich in cysteine)	Sparc	1	16	15	15	323.31	29	2914900000	9.46462	43724000000	10.6407	4468700000	5452800000	4773200000	1490600000	2634000000	1207300000	3738600000	4169700000	4033300000	2603800000	3578100000	5573700000	29	249240000	277980000	268890000	173590000	238540000	371580000	297920000	363520000	318210000	99370000	175600000	80484000	110270000	115600000	139680000	80946000	96589000	126160000	139790000	149720000	144740000	72103000	132780000
P09411	PGK1_MOUSE	Phosphoglycerate kinase 1 (EC 2.7.2.3)	Pgk1 Pgk-1	2	32	32	32	323.31	30	2842600000	9.45372	105180000000	11.0219	10428000000	9846500000	9708200000	11214000000	8517100000	6755500000	2734400000	2721000000	2268700000	10712000000	13954000000	16264000000	30	73904000	73540000	61316000	289520000	377130000	439580000	281850000	266120000	262380000	303090000	230190000	182580000	85009000	84562000	82261000	294730000	385840000	367250000	296450000	263380000	285260000	481110000	384200000
P62962	PROF1_MOUSE	Profilin-1 (Profilin I)	Pfn1	1	13	13	6	277.05	31	2743000000	9.43823	27430000000	10.4382	1907600000	1784900000	1839100000	1293600000	1340800000	927790000	2734100000	2837200000	2498000000	3107200000	3677200000	3482300000	31	273410000	283720000	249800000	310720000	367720000	348230000	190760000	178490000	183910000	129360000	134080000	92779000	81030000	77740000	71087000	73573000	82006000	83828000	54331000	55311000	56596000	47997000	53062000
P16858	G3P_MOUSE	Glyceraldehyde-3-phosphate dehydrogenase (GAPDH) (EC 1.2.1.12) (Peptidyl-cysteine S-nitrosylase GAPDH) (EC 2.6.99.-)	Gapdh Gapd	2	25	25	25	323.31	32	2699500000	9.43128	62088000000	10.793	5778900000	6663900000	5181100000	8033400000	5338400000	4133400000	2245700000	1869800000	1810900000	6393700000	6636800000	7392800000	32	97641000	81297000	78735000	277990000	288560000	321430000	251260000	289730000	225270000	349280000	232110000	179710000	61178000	55585000	52734000	206850000	153470000	126710000	114860000	137240000	123370000	343100000	245220000
P28653	PGS1_MOUSE	Biglycan (Bone/cartilage proteoglycan I) (PG-S1)	Bgn	1	17	17	17	323.31	33	2668900000	9.42633	64053000000	10.8065	6392600000	6675000000	5872400000	2208300000	5778700000	2179400000	5635400000	6415400000	5461000000	4752900000	5059300000	7622900000	33	234810000	267310000	227540000	198040000	210810000	317620000	266360000	278120000	244680000	92013000	240780000	90810000	168470000	189820000	174090000	145120000	132620000	173760000	184420000	181620000	169460000	104120000	276380000
P63017	HSP7C_MOUSE	Heat shock cognate 71 kDa protein (Heat shock 70 kDa protein 8)	Hspa8 Hsc70 Hsc73	2	43	43	38	323.31	34	2576800000	9.41108	105650000000	11.0239	8614400000	7634700000	8151900000	5195300000	5484900000	3933200000	11077000000	11182000000	11088000000	10037000000	10330000000	12909000000	34	270160000	272740000	270430000	244800000	251960000	314860000	210110000	186210000	198830000	126720000	133780000	95931000	204950000	216920000	220340000	597490000	166830000	405590000	136750000	135960000	153000000	415140000	461260000
P52480	KPYM_MOUSE	Pyruvate kinase PKM (EC 2.7.1.40) (Pyruvate kinase muscle isozyme)	Pkm Pk3 Pkm2 Pykm	2	49	49	49	323.31	35	2552500000	9.40697	112310000000	11.0504	9347000000	9712600000	9365300000	8768200000	7773600000	6175100000	6066100000	5298600000	4638900000	12745000000	15135000000	17092000000	35	137870000	120420000	105430000	289650000	343980000	388460000	212430000	220740000	212850000	199280000	176670000	140340000	193100000	179870000	166620000	363520000	413140000	365230000	276390000	270680000	278930000	399210000	322330000
P35700	PRDX1_MOUSE	Peroxiredoxin-1 (EC 1.11.1.15) (Macrophage 23 kDa stress protein) (Osteoblast-specific factor 3) (OSF-3) (Thioredoxin peroxidase 2) (Thioredoxin-dependent peroxide reductase 2)	Prdx1 Msp23 Paga Tdpx2	1	21	21	19	130.24	36	2509100000	9.39952	45163000000	10.6548	3613100000	3568500000	3477400000	2399300000	2302600000	1626400000	3820300000	3684700000	3158100000	4915000000	5458700000	7105700000	36	212240000	204710000	175450000	273060000	303260000	394760000	200730000	198250000	193190000	133290000	127920000	90355000	113320000	112690000	109890000	158090000	150150000	149830000	101690000	92615000	102210000	127240000	110540000
O88569	ROA2_MOUSE	Heterogeneous nuclear ribonucleoproteins A2/B1 (hnRNP A2/B1)	Hnrnpa2b1 Hnrpa2b1	1	29	29	29	323.31	37	2504000000	9.39863	60096000000	10.7788	6198400000	3924600000	3914400000	4058300000	4852200000	3421200000	4833200000	4621800000	4904900000	6399300000	6047600000	6916600000	37	201390000	192570000	204370000	266640000	251980000	288190000	258270000	163520000	163100000	169100000	202180000	142550000	66012000	64069000	73642000	359510000	78378000	184460000	126800000	60986000	66940000	192170000	282850000
P17751	TPIS_MOUSE	Triosephosphate isomerase (TIM) (EC 5.3.1.1) (Methylglyoxal synthase) (EC 4.2.3.3) (Triose-phosphate isomerase)	Tpi1 Tpi	1	20	20	20	323.31	38	2470800000	9.39284	46946000000	10.6716	4547000000	4306300000	3372100000	4793900000	4134300000	3079000000	1101000000	1197300000	974520000	5165600000	6327900000	7836100000	38	57946000	63018000	51291000	271870000	333050000	412430000	239320000	226650000	177480000	252310000	217590000	162050000	41003000	46334000	40307000	176020000	171880000	150610000	120060000	100040000	109170000	195570000	189020000
P62259	1433E_MOUSE	14-3-3 protein epsilon (14-3-3E)	Ywhae	1	24	24	22	255.72	39	2426900000	9.38505	50966000000	10.7073	4441400000	4611700000	4012800000	2932700000	2962500000	2114100000	4233900000	4258800000	3402000000	4590400000	6152000000	7249800000	39	201610000	202800000	162000000	218590000	292950000	345230000	211500000	219600000	191090000	139650000	141070000	100670000	131690000	131720000	113620000	143570000	170040000	158340000	127470000	132050000	131680000	126090000	138650000
P14069	S10A6_MOUSE	Protein S100-A6 (5B10) (Calcyclin) (Prolactin receptor-associated protein) (S100 calcium-binding protein A6)	S100a6 Cacy	1	10	10	10	124.63	40	2393900000	9.37911	16757000000	10.2242	461340000	643090000	143760000	1343600000	2307600000	1991300000	1162200000	1223500000	1197500000	3333600000	1765300000	1184300000	40	166030000	174780000	171070000	476230000	252190000	169180000	65905000	91870000	20537000	191940000	329660000	284470000	32561000	43055000	42358000	101020000	71566000	32596000	12489000	18051000	6981200	62316000	117050000
P63101	1433Z_MOUSE	14-3-3 protein zeta/delta (Protein kinase C inhibitor protein 1) (KCIP-1) (SEZ-2)	Ywhaz	1	19	17	15	323.31	41	2369500000	9.37466	52129000000	10.7171	3870200000	3395900000	3718200000	3206300000	3541100000	2391200000	4361800000	4227000000	3888000000	4740700000	7100300000	7671700000	41	198260000	192140000	176730000	215490000	322740000	348710000	175920000	154360000	169010000	145740000	160960000	108690000	109280000	106040000	139480000	168330000	202940000	204670000	111920000	121150000	128180000	149010000	186100000
P20152	VIME_MOUSE	Vimentin	Vim	3	47	47	45	323.31	42	2332600000	9.36784	100300000000	11.0013	10223000000	8862600000	9307900000	13969000000	11592000000	8645400000	5450800000	4904500000	4904700000	6588000000	7103700000	8731700000	42	126760000	114060000	114060000	153210000	165200000	203060000	237730000	206110000	216460000	324870000	269580000	201060000	189220000	187220000	176470000	217370000	224310000	208660000	293890000	261500000	309780000	544870000	525450000
P11499	HS90B_MOUSE	Heat shock protein HSP 90-beta (Heat shock 84 kDa) (HSP 84) (HSP84) (Tumor-specific transplantation 84 kDa antigen) (TSTA)	Hsp90ab1 Hsp84 Hsp84-1 Hspcb	1	58	56	38	323.31	43	2275000000	9.35698	111480000000	11.0472	7686700000	6988400000	7772600000	4790800000	4048800000	3641400000	14532000000	14425000000	12014000000	10750000000	11136000000	13684000000	43	296580000	294380000	245190000	219380000	227260000	279270000	156870000	142620000	158620000	97772000	82629000	74315000	538300000	550320000	334760000	275200000	387130000	239940000	180990000	169440000	195090000	171110000	269510000
P13020	GELS_MOUSE	Gelsolin (Actin-depolymerizing factor) (ADF) (Brevin)	Gsn Gsb	1	35	35	21	323.31	44	2187200000	9.33989	104980000000	11.0211	10408000000	8895400000	7794100000	4274700000	8687500000	5130600000	4769700000	4899200000	4799900000	11408000000	12165000000	21752000000	44	99368000	102070000	99999000	237660000	253440000	453170000	216830000	185320000	162380000	89056000	180990000	106890000	150880000	167090000	164620000	380540000	329520000	468750000	296110000	254770000	246440000	180440000	376150000
Q9R0E2	PLOD1_MOUSE	Procollagen-lysine,2-oxoglutarate 5-dioxygenase 1 (EC 1.14.11.4) (Lysyl hydroxylase 1) (LH1)	Plod1 Plod	1	43	43	41	323.31	45	2138600000	9.33013	98376000000	10.9929	13401000000	14020000000	12489000000	17524000000	6555100000	5133200000	1349200000	1411200000	1524900000	6790300000	7986200000	10191000000	45	29331000	30679000	33150000	147610000	173610000	221550000	291330000	304780000	271490000	380950000	142500000	111590000	40457000	40344000	47220000	225550000	216760000	221930000	335400000	375570000	343570000	769630000	308080000
Q02844	TRYB1_MOUSE	Tryptase (EC 3.4.21.59) (Mast cell protease 7) (mMCP-7) (Tryptase alpha/beta-1)	Tpsab1 Mcpt7	6	11	11	11	323.31	46	2096500000	9.32149	18868000000	10.2757	2144600000	2237600000	1754100000	1661400000	1717000000	878620000	990520000	1105100000	1100400000	1406300000	1682800000	2189800000	46	110060000	122780000	122260000	156260000	186980000	243320000	238290000	248620000	194900000	184600000	190770000	97625000	37335000	35570000	38165000	44095000	49568000	47333000	57584000	58718000	50983000	72617000	78472000
Q03366	CCL7_MOUSE	C-C motif chemokine 7 (Intercrine/chemokine MARC) (Monocyte chemoattractant protein 3) (Monocyte chemotactic protein 3) (MCP-3) (Protein FIC) (Small-inducible cytokine A7)	Ccl7 Fic Mcp3 Scya7	1	4	4	4	41.852	47	2090200000	9.32019	10451000000	10.0192	434130000	552600000	375050000	1571000000	3646400000	942920000	230170000	232640000	266290000	895390000	623610000	680590000	47	46035000	46528000	53259000	179080000	124720000	136120000	86826000	110520000	75010000	314200000	729280000	188580000	4681000	11723000	7804600	32012000	15345000	19283000	15086000	5698000	14169000	73467000	174320000
P50543	S10AB_MOUSE	Protein S100-A11 (Calgizzarin) (Endothelial monocyte-activating polypeptide) (EMAP) (Protein S100-C) (S100 calcium-binding protein A11)	S100a11 S100c	1	5	5	5	78.715	48	1995200000	9.29999	9976100000	9.99896	463390000	701130000	358500000	1119300000	440450000	1123000000	942910000	811010000	816880000	823010000	1094100000	1279400000	48	188580000	162200000	163380000	164600000	218810000	255880000	92679000	140230000	71700000	223860000	88090000	224610000	33798000	32928000	28498000	31179000	42227000	33955000	16984000	26530000	14174000	22502000	25046000
P99027	RLA2_MOUSE	60S acidic ribosomal protein P2	Rplp2	1	10	10	10	323.31	49	1928000000	9.28511	9640100000	9.98408	644290000	802210000	853480000	680830000	608660000	387580000	946720000	1001900000	984350000	811880000	871900000	1046300000	49	189340000	200380000	196870000	162380000	174380000	209250000	128860000	160440000	170700000	136170000	121730000	77516000	29993000	30736000	34340000	30484000	22365000	22367000	22750000	22146000	24300000	32619000	27232000
P11087	CO1A1_MOUSE	Collagen alpha-1(I) chain (Alpha-1 type I collagen)	Col1a1 Cola1	2	54	54	53	323.31	50	1913000000	9.28171	168340000000	11.2262	27405000000	24360000000	21935000000	7311900000	10513000000	5179500000	6371300000	7150600000	6846800000	13447000000	15358000000	22463000000	50	72402000	81257000	77804000	152810000	174530000	255260000	311420000	276820000	249260000	83090000	119460000	58858000	211450000	234950000	223320000	334300000	279470000	330460000	714360000	632200000	644690000	338730000	521090000
P08113	ENPL_MOUSE	Endoplasmin (94 kDa glucose-regulated protein) (GRP-94) (Endoplasmic reticulum resident protein 99) (ERp99) (Heat shock protein 90 kDa beta member 1) (Polymorphic tumor rejection antigen 1) (Tumor rejection antigen gp96)	Hsp90b1 Grp94 Tra-1 Tra1	1	63	63	61	323.31	51	1902900000	9.27942	106560000000	11.0276	6210900000	6775200000	6806800000	23636000000	12112000000	11175000000	5363500000	4964800000	5477900000	7247200000	8454100000	8339100000	51	95777000	88657000	97820000	129410000	150970000	148910000	110910000	120980000	121550000	422060000	216280000	199550000	164390000	160500000	201200000	206350000	232310000	205860000	187420000	220020000	234670000	1003800000	573580000
Q61207	SAP_MOUSE	Prosaposin (Sulfated glycoprotein 1) (SGP-1) [Cleaved into: Saposin-A; Saposin-B-Val; Saposin-B; Saposin-C; Saposin-D]	Psap Sgp1	1	29	29	29	323.31	52	1817200000	9.2594	67237000000	10.8276	7321100000	6780100000	6383900000	7606700000	7553000000	3951100000	3203800000	3549600000	3618500000	4314300000	4914600000	8038300000	52	86588000	95936000	97798000	116600000	132830000	217250000	197870000	183250000	172540000	205590000	204130000	106790000	107210000	113460000	130800000	138270000	141840000	183200000	203510000	187770000	190220000	326080000	325050000
P84228	H32_MOUSE	Histone H3.2	Hist1h3b H3-53 H3.2 H3b; Hist1h3c H3-143; Hist1h3d H3-B; Hist1h3e H3-F; Hist1h3f H3.2-221 H3f; Hist2h3b H3.2-616; Hist2h3c1 H3.2-615 Hist2h3ca1; Hist2h3c2 H3.2-614 Hist2h3ca2	1	5	5	1	111.65	53	1717400000	9.23487	15456000000	10.1891	864710000	965860000	1071600000	3658600000	1920500000	838270000	965370000	1063900000	976310000	757960000	1002800000	1346800000	53	107260000	118210000	108480000	84218000	111420000	149650000	96079000	107320000	119070000	406510000	213390000	93141000	40794000	48425000	32647000	22191000	27810000	44407000	35971000	28882000	37213000	149130000	88955000
P07141	CSF1_MOUSE	Macrophage colony-stimulating factor 1 (CSF-1) (MCSF) [Cleaved into: Processed macrophage colony-stimulating factor 1]	Csf1 Csfm	1	19	19	19	323.31	54	1683300000	9.22616	53867000000	10.7313	6386900000	5410000000	5236600000	2859800000	5120300000	2286300000	3369200000	3646600000	3489300000	2439900000	5587800000	8034100000	54	105290000	113960000	109040000	76248000	174620000	251070000	199590000	169060000	163640000	89370000	160010000	71448000	106760000	120580000	120530000	78746000	150330000	172900000	169800000	153580000	154390000	139040000	223430000
P15532	NDKA_MOUSE	Nucleoside diphosphate kinase A (NDK A) (NDP kinase A) (EC 2.7.4.6) (Metastasis inhibition factor NM23) (NDPK-A) (Tumor metastatic process-associated protein) (nm23-M1)	Nme1 Nm23	1	13	13	7	144.43	55	1681900000	9.2258	25229000000	10.4019	1917100000	1939000000	1951300000	1077600000	1159100000	836500000	2733700000	2504400000	2217200000	2254400000	2971100000	3663700000	55	182240000	166960000	147810000	150290000	198080000	244250000	127810000	129270000	130080000	71838000	77275000	55767000	89059000	87370000	77550000	60119000	79664000	88139000	56100000	55382000	60489000	44158000	49752000
P09103	PDIA1_MOUSE	Protein disulfide-isomerase (PDI) (EC 5.3.4.1) (Cellular thyroid hormone-binding protein) (Endoplasmic reticulum resident protein 59) (ER protein 59) (ERp59) (Prolyl 4-hydroxylase subunit beta) (p55)	P4hb Pdia1	1	42	42	42	323.31	56	1681600000	9.22572	72310000000	10.8592	5534800000	5912200000	5708800000	14014000000	11086000000	8020600000	2340700000	2521900000	2608000000	3747100000	5093400000	5722000000	56	54435000	58649000	60650000	87142000	118450000	133070000	128720000	137490000	132760000	325910000	257810000	186520000	71765000	75171000	85632000	106240000	128060000	117570000	136330000	139450000	144400000	737260000	660640000
Q03350	TSP2_MOUSE	Thrombospondin-2	Thbs2 Tsp2	1	42	42	41	323.31	57	1672700000	9.22342	91996000000	10.9638	7103600000	7308700000	7331300000	3490900000	4125000000	2552700000	2012700000	2360800000	2838900000	2964400000	20916000000	28693000000	57	36595000	42923000	51615000	53898000	380300000	521690000	129160000	132890000	133300000	63471000	75000000	46413000	32438000	33928000	34465000	164400000	182850000	209140000	349570000	320400000	301200000	282020000	317760000
P68372	TBB4B_MOUSE	Tubulin beta-4B chain (Tubulin beta-2C chain)	Tubb4b Tubb2c	2	26	26	1	323.31	58	1672600000	9.22339	36798000000	10.5658	2366900000	3149600000	2848400000	1486300000	1200300000	891820000	4901600000	4873100000	4061300000	3447700000	3712300000	3847400000	58	222800000	221500000	184600000	156710000	168740000	174880000	107590000	143160000	129470000	67557000	54559000	40537000	126880000	127650000	147650000	104970000	113840000	78396000	67314000	80040000	78632000	70897000	63751000
P15626	GSTM2_MOUSE	Glutathione S-transferase Mu 2 (EC 2.5.1.18) (GST 5-5) (GST class-mu 2) (Glutathione S-transferase pmGT2)	Gstm2	1	25	25	16	202.22	59	1659200000	9.2199	34844000000	10.5421	3067000000	3611300000	3161400000	2948000000	1902000000	1853000000	1549300000	1596900000	1328400000	3830900000	4146800000	5848800000	59	73778000	76043000	63256000	182430000	197460000	278510000	146050000	171970000	150540000	140380000	90571000	88237000	56681000	58829000	53865000	112840000	119510000	136530000	86417000	101690000	97551000	125220000	88803000
P68134	ACTS_MOUSE	Actin, alpha skeletal muscle (Alpha-actin-1) [Cleaved into: Actin, alpha skeletal muscle, intermediate form]	Acta1 Acta	4	27	12	12	158.1	60	1655300000	9.21888	39726000000	10.5991	603550000	425880000	3894600000	1961100000	1651100000	1386600000	5490200000	4915300000	5211900000	4140500000	4233300000	4893300000	60	228760000	204810000	217160000	172520000	176390000	203890000	25148000	17745000	162270000	81711000	68794000	57775000	38611000	79516000	45974000	28805000	30247000	66706000	40654000	16309000	55876000	54771000	43460000
P20029	GRP78_MOUSE	Endoplasmic reticulum chaperone BiP (EC 3.6.4.10) (78 kDa glucose-regulated protein) (GRP-78) (Binding-immunoglobulin protein) (BiP) (Heat shock protein 70 family protein 5) (HSP70 family protein 5) (Heat shock protein family A member 5) (Immunoglobulin heavy chain-binding protein)	Hspa5 Grp78	1	41	39	39	323.31	61	1636500000	9.21392	68731000000	10.8372	5210200000	5358000000	4805500000	10655000000	6634300000	5761500000	4212900000	4548100000	4540000000	4891100000	5396600000	6701200000	61	100310000	108290000	108090000	116450000	128490000	159550000	124050000	127570000	114420000	253700000	157960000	137180000	121050000	132470000	110180000	136730000	109580000	137650000	127200000	136510000	135610000	539300000	368580000
P14211	CALR_MOUSE	Calreticulin (CRP55) (Calregulin) (Endoplasmic reticulum resident protein 60) (ERp60) (HACBP)	Calr	1	22	22	22	323.31	62	1605700000	9.20566	51383000000	10.7108	3869400000	3344900000	3284600000	6978100000	6223100000	4925000000	3268100000	3322900000	3793200000	3229900000	4249800000	4893700000	62	102130000	103840000	118540000	100930000	132800000	152930000	120920000	104530000	102640000	218060000	194470000	153910000	107040000	109730000	137190000	104700000	117720000	119050000	113290000	105070000	122440000	302420000	287880000
P40124	CAP1_MOUSE	Adenylyl cyclase-associated protein 1 (CAP 1)	Cap1 Cap	2	24	24	24	323.31	63	1564100000	9.19426	51616000000	10.7128	9955700000	8360000000	875640000	1168200000	1742800000	875510000	6110800000	6864700000	5136500000	3105900000	5172500000	1466900000	63	185180000	208020000	155650000	94119000	156740000	44452000	301690000	253330000	26535000	35401000	52812000	26531000	131110000	129770000	119500000	166700000	169520000	174480000	131600000	125780000	144370000	122050000	86910000
P10148	CCL2_MOUSE	C-C motif chemokine 2 (Monocyte chemoattractant protein 1) (Monocyte chemotactic protein 1) (MCP-1) (Platelet-derived growth factor-inducible protein JE) (Small-inducible cytokine A2)	Ccl2 Je Mcp1 Scya2	1	5	5	5	20.416	64	1557800000	9.19251	15578000000	10.1925	1906400000	1730300000	1290900000	984840000	2868700000	600950000	479670000	481180000	412470000	1358600000	1299300000	2164600000	64	47967000	48118000	41247000	135860000	129930000	216460000	190640000	173030000	129090000	98484000	286870000	60095000	15078000	15336000	14236000	49883000	36693000	46997000	49025000	42888000	35947000	45356000	144480000
P10649	GSTM1_MOUSE	Glutathione S-transferase Mu 1 (EC 2.5.1.18) (GST 1-1) (GST class-mu 1) (Glutathione S-transferase GT8.7) (pmGT10)	Gstm1	1	23	19	13	122.82	65	1529100000	9.18444	33641000000	10.5269	2281500000	2486700000	2442700000	2984400000	2150100000	2666600000	1657800000	1647600000	1386900000	4110200000	4644400000	5181800000	65	75355000	74890000	63042000	186830000	211110000	235530000	103700000	113030000	111030000	135660000	97733000	121210000	48346000	47028000	44249000	207990000	112280000	103350000	60486000	65999000	74668000	130920000	92151000
P10639	THIO_MOUSE	Thioredoxin (Trx) (ATL-derived factor) (ADF)	Txn Txn1	1	9	9	9	181.8	66	1497600000	9.1754	11981000000	10.0785	949110000	784650000	740840000	468940000	402800000	355150000	1304600000	1355000000	1044200000	1125800000	1540200000	1908900000	66	163070000	169380000	130530000	140730000	192530000	238610000	118640000	98081000	92605000	58617000	50350000	44394000	34203000	42355000	38151000	23235000	41013000	42619000	25645000	26411000	25238000	24790000	22103000
A2BH40	ARI1A_MOUSE	AT-rich interactive domain-containing protein 1A (ARID domain-containing protein 1A) (BRG1-associated factor 250) (BAF250) (BRG1-associated factor 250a) (BAF250A) (Osa homolog 1) (SWI-like protein) (SWI/SNF complex protein p270) (SWI/SNF-related, matrix-associated, actin-dependent regulator of chromatin subfamily F member 1)	Arid1a Baf250 Baf250a Osa1 Smarcf1	1	2	2	2	-2	67	1487000000	9.17231	141270000000	11.15	10266000000	10765000000	10866000000	1359000000	3443700000	1561200000	10876000000	13849000000	12007000000	2651600000	9072100000	13547000000	67	114480000	145780000	126390000	27912000	95496000	142600000	108060000	113310000	114380000	14305000	36250000	16434000	0	0	0	0	0	0	0	0	0	0	0
P68369	TBA1A_MOUSE	Tubulin alpha-1A chain (Alpha-tubulin 1) (Alpha-tubulin isotype M-alpha-1) (Tubulin alpha-1 chain) [Cleaved into: Detyrosinated tubulin alpha-1A chain]	Tuba1a Tuba1	2	27	27	1	323.31	68	1444000000	9.15957	34657000000	10.5398	2466600000	2671900000	2477900000	1569600000	1095100000	972420000	4268700000	4519100000	4361500000	3409700000	3250500000	3563700000	68	177860000	188300000	181730000	142070000	135440000	148490000	102770000	111330000	103240000	65398000	45628000	40517000	172930000	128440000	128510000	112590000	84131000	71958000	61916000	67457000	72576000	75956000	60046000
Q9QZZ6	DERM_MOUSE	Dermatopontin (Early quiescence protein 1) (EQ-1) (Tyrosine-rich acidic matrix protein) (TRAMP)	Dpt	1	7	7	7	176.42	69	1420300000	9.15238	15623000000	10.1938	2823500000	2145600000	1695600000	989920000	3371400000	1066700000	52529000	30736000	62180000	834080000	1006600000	1544400000	69	4775300	2794200	5652700	75825000	91508000	140400000	256680000	195060000	154150000	89993000	306490000	96972000	1409400	1236100	1487900	27825000	25816000	24523000	49219000	55139000	34049000	41305000	149860000
P18760	COF1_MOUSE	Cofilin-1 (Cofilin, non-muscle isoform)	Cfl1	1	14	14	13	323.31	70	1411000000	9.14953	19754000000	10.2957	1920500000	2037900000	1848900000	865920000	750180000	551100000	1882600000	1850600000	1555100000	1785400000	2115600000	2581400000	70	134470000	132190000	111080000	127530000	151120000	184390000	137180000	145570000	132060000	61851000	53584000	39365000	58516000	56760000	52363000	60127000	58611000	60786000	47404000	52673000	53845000	42768000	39284000
Q99PT1	GDIR1_MOUSE	Rho GDP-dissociation inhibitor 1 (Rho GDI 1) (GDI-1) (Rho-GDI alpha)	Arhgdia C87222 Gdi1	1	12	12	12	239.97	71	1399000000	9.14582	23783000000	10.3763	2129300000	1915300000	2072200000	1529100000	1044500000	804360000	1869900000	1758200000	1601100000	2365500000	3016400000	3676500000	71	110000000	103420000	94183000	139150000	177440000	216270000	125250000	112660000	121900000	89949000	61444000	47315000	60386000	58508000	54079000	69835000	82562000	81750000	59199000	52187000	62114000	67471000	59894000
Q04857	CO6A1_MOUSE	Collagen alpha-1(VI) chain	Col6a1	1	45	45	45	323.31	72	1390600000	9.1432	90386000000	10.9561	9150600000	9474900000	8272700000	5785900000	5356300000	3875200000	7586900000	7971900000	8389500000	6625100000	7084500000	10813000000	72	116720000	122640000	129070000	101920000	108990000	166360000	140780000	145770000	127270000	89013000	82405000	59619000	218340000	232800000	253640000	223240000	199300000	244700000	277740000	268340000	248550000	255040000	232570000
P26883	FKB1A_MOUSE	Peptidyl-prolyl cis-trans isomerase FKBP1A (PPIase FKBP1A) (EC 5.2.1.8) (12 kDa FK506-binding protein) (12 kDa FKBP) (FKBP-12) (Calstabin-1) (FK506-binding protein 1A) (FKBP-1A) (Immunophilin FKBP12) (Rotamase)	Fkbp1a Fkbp1	1	7	7	7	76.784	73	1358400000	9.13303	8150600000	9.91119	857750000	637430000	681950000	422220000	458520000	334400000	605530000	739350000	395210000	843430000	746820000	1427500000	73	100920000	123220000	65868000	140570000	124470000	237920000	142960000	106240000	113660000	70371000	76420000	55733000	19886000	24888000	17600000	22453000	22211000	31302000	24491000	18918000	20006000	17046000	20824000
P63242	IF5A1_MOUSE	Eukaryotic translation initiation factor 5A-1 (eIF-5A-1) (eIF-5A1) (Eukaryotic initiation factor 5A isoform 1) (eIF-5A) (eIF-4D)	Eif5a	2	13	13	13	170.82	74	1318200000	9.11998	13182000000	10.12	725250000	878610000	781820000	631450000	621770000	535070000	1494800000	1499300000	1262800000	1487800000	1588800000	1667000000	74	149480000	149930000	126280000	148780000	158880000	166700000	72525000	87861000	78182000	63145000	62177000	53507000	48831000	45863000	47603000	36047000	48839000	40155000	20463000	26277000	23548000	27647000	27158000
Q61508	ECM1_MOUSE	Extracellular matrix protein 1 (Secretory component p85)	Ecm1	1	32	32	32	323.31	75	1282400000	9.10802	56427000000	10.7515	8013500000	9110500000	6560400000	6758100000	4148300000	2356900000	1309900000	1329000000	1388100000	4131400000	4551000000	6769600000	75	29772000	30206000	31547000	93896000	103430000	153850000	182120000	207060000	149100000	153590000	94279000	53565000	43227000	50721000	49297000	132620000	126490000	153610000	237360000	247000000	192110000	265650000	193140000
P82198	BGH3_MOUSE	Transforming growth factor-beta-induced protein ig-h3 (Beta ig-h3)	Tgfbi	1	40	40	40	323.31	76	1243800000	9.09475	58459000000	10.7669	8173100000	7266100000	6402700000	3334900000	5038200000	2742700000	2309800000	2203200000	2479900000	4971400000	5214700000	8322800000	76	49146000	46877000	52764000	105770000	110950000	177080000	173900000	154600000	136230000	70955000	107200000	58355000	68572000	75728000	71886000	146620000	125590000	187390000	216170000	198890000	189620000	133830000	209110000
Q9R118	HTRA1_MOUSE	Serine protease HTRA1 (EC 3.4.21.-) (High-temperature requirement A serine peptidase 1) (Serine protease 11)	Htra1 Htra Prss11	1	31	31	31	323.31	77	1242700000	9.09437	34794000000	10.5415	4258700000	4474600000	4525900000	3024100000	2890700000	2462400000	820470000	835000000	854950000	2922300000	2895700000	4828800000	77	29303000	29821000	30534000	104370000	103420000	172460000	152100000	159810000	161640000	108000000	103240000	87943000	31656000	31522000	35146000	97384000	88372000	112430000	125720000	135090000	125800000	128800000	130870000
P70296	PEBP1_MOUSE	Phosphatidylethanolamine-binding protein 1 (PEBP-1) (HCNPpp) [Cleaved into: Hippocampal cholinergic neurostimulating peptide (HCNP)]	Pebp1 Pbp Pebp	2	14	14	14	164.83	78	1229200000	9.08962	14751000000	10.1688	1369800000	991440000	1343000000	570070000	1074800000	258170000	1128400000	1094200000	931700000	1291900000	2147300000	2548700000	78	94036000	91186000	77642000	107660000	178940000	212390000	114150000	82620000	111910000	47506000	89563000	21514000	36182000	35440000	30582000	45023000	55332000	57632000	41833000	35471000	38836000	25633000	45231000
P37889	FBLN2_MOUSE	Fibulin-2 (FIBL-2)	Fbln2	1	41	41	41	323.31	79	1188700000	9.07507	66569000000	10.8233	7044800000	7914000000	6432500000	3057800000	5357100000	5155400000	3961800000	4421500000	4500800000	4877200000	5762100000	8084500000	79	70747000	78956000	80371000	87093000	102890000	144370000	125800000	141320000	114870000	54603000	95662000	92060000	123280000	135120000	150750000	173900000	164970000	193470000	206670000	223000000	209070000	139350000	251410000
P14426	HA13_MOUSE	H-2 class I histocompatibility antigen, D-K alpha chain (H-2D(K))	H2-D1	1	11	8	6	120.77	80	1183900000	9.07332	28413000000	10.4535	2942100000	2817600000	2179300000	3222300000	2333200000	1466200000	1054700000	1003600000	1064000000	3298800000	3591000000	3439800000	80	43944000	41819000	44335000	137450000	149620000	143330000	122590000	117400000	90802000	134260000	97218000	61092000	32715000	36554000	32563000	129040000	114030000	72708000	78081000	31020000	91368000	130030000	123500000
P16110	LEG3_MOUSE	Galectin-3 (Gal-3) (35 kDa lectin) (Carbohydrate-binding protein 35) (CBP 35) (Galactose-specific lectin 3) (IgE-binding protein) (L-34 galactoside-binding lectin) (Laminin-binding protein) (Lectin L-29) (Mac-2 antigen)	Lgals3	1	9	9	9	124.02	81	1061500000	9.02592	11676000000	10.0673	1280300000	1278700000	1294600000	1063900000	841510000	623020000	530540000	482410000	448460000	1166600000	1243700000	1419800000	81	48231000	43855000	40769000	106060000	113060000	129070000	116390000	116240000	117690000	96717000	76501000	56638000	17442000	15361000	15878000	43570000	31627000	32090000	37883000	36644000	41391000	37557000	29863000
P55065	PLTP_MOUSE	Phospholipid transfer protein (Lipid transfer protein II)	Pltp	1	22	22	22	220.49	82	1048900000	9.02073	28321000000	10.4521	3890700000	4018200000	3777200000	2063600000	1892800000	1494500000	1029800000	1133200000	958930000	2118200000	2486200000	3458200000	82	38141000	41969000	35516000	78451000	92082000	128080000	144100000	148820000	139900000	76429000	70102000	55350000	31900000	34112000	33637000	69118000	68045000	74815000	108220000	113750000	113770000	84990000	85786000
P27773	PDIA3_MOUSE	Protein disulfide-isomerase A3 (EC 5.3.4.1) (58 kDa glucose-regulated protein) (58 kDa microsomal protein) (p58) (Disulfide isomerase ER-60) (Endoplasmic reticulum resident protein 57) (ER protein 57) (ERp57) (Endoplasmic reticulum resident protein 60) (ER protein 60) (ERp60)	Pdia3 Erp Erp60 Grp58	1	40	40	40	323.31	83	1037300000	9.0159	43567000000	10.6392	3164100000	3291100000	3233500000	5494100000	5037100000	3372200000	2739300000	2884300000	3137000000	2977000000	3584700000	4652000000	83	65222000	68675000	74689000	70880000	85350000	110760000	75337000	78361000	76989000	130810000	119930000	80291000	76901000	79351000	132080000	127540000	121280000	86626000	81635000	77659000	87529000	274590000	278100000
Q00493	CBPE_MOUSE	Carboxypeptidase E (CPE) (EC 3.4.17.10) (Carboxypeptidase H) (CPH) (Enkephalin convertase) (Prohormone-processing carboxypeptidase)	Cpe	1	26	26	26	323.31	84	1000100000	9.00004	30002000000	10.4772	4376400000	4591700000	3931300000	2304500000	2821300000	1654200000	632310000	644340000	693330000	2321700000	2547400000	3483700000	84	21077000	21478000	23111000	77389000	84913000	116120000	145880000	153060000	131040000	76817000	94045000	55140000	24735000	24931000	28230000	58763000	73199000	81651000	119490000	123990000	123440000	96460000	129690000
Q9Z2L7	CRLF3_MOUSE	Cytokine receptor-like factor 3 (Cytokine receptor-like molecule 9) (CREME-9) (Cytokine receptor-related factor 4)	Crlf3 Creme9 Cytor4	1	2	2	2	6.6988	85	996020000	8.99827	25897000000	10.4132	26391000	39269000	0	1875500000	4654800000	3047400000	1823500000	148530000	2455800000	6772500000	2672000000	39784000	85	70135000	5712700	94454000	260480000	102770000	1530200	1015000	1510300	0	72133000	179030000	117210000	66360000	29789000	0	89644000	82323000	15370000	0	0	0	0	0
P10126	EF1A1_MOUSE	Elongation factor 1-alpha 1 (EF-1-alpha-1) (Elongation factor Tu) (EF-Tu) (Eukaryotic elongation factor 1 A-1) (eEF1A-1)	Eef1a1 Eef1a	2	20	20	20	204.08	86	990640000	8.99592	28728000000	10.4583	2530000000	2787900000	2513800000	1507300000	1011800000	625850000	3372000000	3216200000	3095600000	2335000000	2629600000	3034000000	86	116280000	110900000	106750000	80519000	90677000	104620000	87240000	96134000	86684000	51975000	34890000	21581000	109510000	96968000	105280000	73605000	77387000	64431000	62625000	75649000	71257000	66316000	46314000
P10605	CATB_MOUSE	Cathepsin B (EC 3.4.22.1) (Cathepsin B1) [Cleaved into: Cathepsin B light chain; Cathepsin B heavy chain]	Ctsb	1	16	16	16	295.49	87	971750000	8.98755	19435000000	10.2886	2688500000	2287000000	1945500000	584930000	1238700000	351520000	1541900000	1762300000	1556100000	641990000	2054800000	2781700000	87	77094000	88116000	77806000	32099000	102740000	139090000	134420000	114350000	97275000	29246000	61936000	17576000	45062000	52058000	46662000	23056000	56413000	71105000	81642000	66841000	66086000	23463000	52977000
Q3THW5	H2AV_MOUSE	Histone H2A.V (H2A.F/Z)	H2afv H2av	2	6	6	4	47.807	88	949300000	8.9774	7594400000	9.88049	565750000	731200000	717310000	1453100000	914250000	257360000	438690000	494710000	469970000	374550000	467910000	704790000	88	54837000	61839000	58746000	46819000	58489000	88099000	70719000	91400000	89663000	181640000	114280000	32170000	13473000	16460000	16486000	13673000	14215000	16111000	16086000	19000000	21127000	63132000	44305000
Q64523	H2A2C_MOUSE	Histone H2A type 2-C (H2a-613B)	Hist2h2ac Hist2h2ab	16	5	3	2	95.391	89	941320000	8.97374	6589300000	9.81884	589270000	576420000	530870000	1215600000	677680000	183200000	421060000	493280000	374290000	356510000	419220000	711010000	89	60152000	70469000	53471000	50930000	59889000	101570000	84182000	82346000	75839000	173650000	96812000	26171000	0	0	0	17032000	0	0	0	0	0	52174000	0
Q01768	NDKB_MOUSE	Nucleoside diphosphate kinase B (NDK B) (NDP kinase B) (EC 2.7.4.6) (Histidine protein kinase NDKB) (EC 2.7.13.3) (P18) (nm23-M2)	Nme2	1	11	5	5	57.76	90	940430000	8.97333	15047000000	10.1774	1312200000	1304500000	1567200000	403660000	422360000	273250000	1628800000	1657700000	1379600000	865680000	1666200000	2565600000	90	101800000	103610000	86223000	54105000	104140000	160350000	82015000	81530000	97950000	25229000	26397000	17078000	53851000	51796000	50168000	29993000	47430000	58011000	38627000	34392000	42651000	19988000	21872000
Q9QXC1	FETUB_MOUSE	Fetuin-B (Fetuin-like protein IRL685)	Fetub	1	16	16	16	263.71	91	940000000	8.97313	21620000000	10.3349	4390900000	2733800000	3614700000	569880000	2381200000	1568100000	542730000	729020000	568430000	942610000	1422600000	2153800000	91	23597000	31697000	24714000	40983000	61852000	93643000	190910000	118860000	157160000	24777000	103530000	68177000	21403000	24304000	23844000	33965000	39224000	52325000	114720000	72721000	102340000	24672000	117340000
Q05793	PGBM_MOUSE	Basement membrane-specific heparan sulfate proteoglycan core protein (HSPG) [Cleaved into: Endorepellin; LG3 peptide]	Hspg2	1	138	138	138	323.31	92	933420000	8.97008	164280000000	11.2156	18177000000	16933000000	15273000000	12647000000	10822000000	8620500000	9952200000	11100000000	10991000000	13796000000	15292000000	20677000000	92	56547000	63070000	62448000	78384000	86888000	117480000	103280000	96207000	86776000	71859000	61489000	48980000	473490000	371230000	386060000	263730000	638460000	497550000	549550000	484670000	460380000	482830000	493870000
P04117	FABP4_MOUSE	Fatty acid-binding protein, adipocyte (3T3-L1 lipid-binding protein) (Adipocyte lipid-binding protein) (ALBP) (Adipocyte-type fatty acid-binding protein) (A-FABP) (AFABP) (Fatty acid-binding protein 4) (Myelin P2 protein homolog) (P15) (P2 adipocyte protein) (Protein 422)	Fabp4 Ap2	3	12	12	12	99.925	93	929720000	8.96835	11157000000	10.0475	1019500000	940960000	839020000	1270800000	1023500000	985760000	469760000	451520000	341230000	1024100000	1310600000	1477900000	93	39147000	37627000	28436000	85343000	109210000	123160000	84956000	78414000	69919000	105900000	85289000	82147000	14361000	12906000	10973000	33092000	32072000	28730000	31849000	27896000	27687000	55065000	45175000
Q6P1F6	2ABA_MOUSE	Serine/threonine-protein phosphatase 2A 55 kDa regulatory subunit B alpha isoform (PP2A subunit B isoform B55-alpha) (PP2A subunit B isoform PR55-alpha) (PP2A subunit B isoform R2-alpha) (PP2A subunit B isoform alpha)	Ppp2r2a	3	3	3	3	8.07	94	923480000	8.96543	30475000000	10.4839	1860200	3449100000	6546900000	150760000	1058000	801780	14019000000	3844900	3227900	7453700	2941000	6287700000	94	424820000	116510	97815	225870	89121	190540000	56370	104520000	198390000	4568600	32059	24296	334640000	0	0	0	0	235370000	0	0	0	35955000	0
P47955	RLA1_MOUSE	60S acidic ribosomal protein P1	Rplp1	1	3	3	3	43.746	95	907120000	8.95766	3628500000	9.55973	353890000	295500000	305920000	306900000	189550000	136130000	361430000	326840000	345180000	324250000	321270000	361640000	95	90357000	81711000	86294000	81062000	80317000	90409000	88473000	73875000	76480000	76724000	47388000	34033000	10770000	8605700	11340000	13121000	9488000	8157400	8887700	7306600	8373300	15893000	11040000
Q07797	LG3BP_MOUSE	Galectin-3-binding protein (Cyp-C-associated protein) (CyCAP) (Lectin galactoside-binding soluble 3-binding protein) (Protein MAMA)	Lgals3bp Cycap Mama	1	19	19	19	323.31	96	901490000	8.95496	26143000000	10.4174	3359700000	3327500000	2667700000	1021400000	2608900000	1349500000	1368200000	1359500000	1313100000	1868700000	2147000000	3752100000	96	47180000	46880000	45281000	64439000	74035000	129380000	115850000	114740000	91990000	35219000	89961000	46535000	40606000	46596000	45893000	56335000	57786000	80637000	92144000	92134000	77053000	49963000	126460000
O35988	SDC4_MOUSE	Syndecan-4 (SYND4) (Ryudocan core protein)	Sdc4	1	6	6	6	99.08	97	899160000	8.95384	8991600000	9.95384	956910000	1265600000	856360000	844630000	830450000	618170000	359100000	417700000	345990000	526630000	779420000	1190600000	97	35910000	41770000	34599000	52663000	77942000	119060000	95691000	126560000	85636000	84463000	83045000	61817000	13675000	16277000	14817000	19448000	25067000	30584000	31531000	38212000	28723000	28529000	31587000
O35887	CALU_MOUSE	Calumenin (Crocalbin)	Calu	1	25	25	25	323.31	98	882900000	8.94591	16775000000	10.2247	1515700000	1646100000	1067700000	3573900000	1457200000	893250000	881700000	893950000	972620000	599410000	1433800000	1839600000	98	46405000	47050000	51191000	31548000	75463000	96820000	79776000	86638000	56196000	188100000	76695000	47013000	38910000	38453000	42359000	16085000	48323000	46441000	46845000	55350000	44344000	120610000	60891000
Q9Z0F7	SYUG_MOUSE	Gamma-synuclein (Persyn)	Sncg Persyn	1	12	12	12	323.31	99	880760000	8.94486	8807600000	9.94486	811600000	724300000	609660000	796050000	782660000	553710000	386980000	410480000	486200000	1119700000	982110000	1144200000	99	38698000	41048000	48620000	111970000	98211000	114420000	81160000	72430000	60966000	79605000	78266000	55371000	14268000	14903000	17856000	32964000	28581000	29712000	24739000	26356000	24529000	30524000	32033000
Q61553	FSCN1_MOUSE	Fascin (Singed-like protein)	Fscn1 Fan1 Snl	1	30	30	30	323.31	100	863240000	8.93613	31940000000	10.5043	2607600000	2613300000	2741700000	1645800000	1219000000	1007900000	2986200000	2882300000	2908400000	3508500000	3450200000	4368900000	100	80708000	77899000	78605000	94825000	93249000	118080000	70476000	70630000	74099000	44481000	32947000	27242000	87713000	79115000	81195000	122860000	92041000	96054000	71749000	73852000	82997000	87738000	78351000
Q9EQC7	FSTL3_MOUSE	Follistatin-related protein 3 (Follistatin-like protein 3) (Follistatin-related gene protein)	Fstl3 Flrg	1	10	10	10	323.31	101	843760000	8.92622	12656000000	10.1023	2578300000	2276300000	1885400000	1611400000	567640000	480430000	162830000	187450000	138140000	631230000	847360000	1290000000	101	10856000	12496000	9209200	42082000	56491000	85998000	171890000	151750000	125690000	107430000	37842000	32028000	6604000	7515300	7066200	21552000	24406000	28591000	70113000	64129000	57989000	60936000	31437000
P62983	RS27A_MOUSE	Ubiquitin-40S ribosomal protein S27a (Ubiquitin carboxyl extension protein 80) [Cleaved into: Ubiquitin; 40S ribosomal protein S27a]	Rps27a Uba80 Ubcep1	4	6	6	6	95.408	102	838590000	8.92355	11740000000	10.0697	1244500000	980420000	1135900000	310400000	377380000	187370000	1370200000	1328500000	1228500000	511300000	1278200000	1778100000	102	97869000	94890000	87749000	36521000	91299000	127000000	88894000	70030000	81137000	22171000	26956000	13383000	41330000	39724000	41013000	19296000	34683000	36263000	30315000	22213000	30306000	13935000	17904000
Q62433	NDRG1_MOUSE	Protein NDRG1 (N-myc downstream-regulated gene 1 protein) (Protein Ndr1)	Ndrg1 Ndr1 Ndrl Tdd5	1	12	12	12	323.31	103	835050000	8.92171	15866000000	10.2005	1445800000	1443500000	1465400000	1954200000	1154900000	777430000	77194000	143200000	127770000	2059100000	2635900000	2581700000	103	4062800	7536800	6724900	108370000	138730000	135880000	76093000	75975000	77125000	102850000	60786000	40917000	5848400	7170700	6649100	51510000	70625000	51130000	43784000	41079000	43345000	84274000	56545000
Q7TPC1	CDSN_MOUSE	Corneodesmosin	Cdsn	1	13	13	13	194.49	104	829030000	8.91857	17410000000	10.2408	1376800000	1274900000	1283200000	1030700000	798920000	891010000	2260600000	2461100000	2410300000	931800000	1459100000	1231100000	104	107650000	117200000	114780000	44371000	69483000	58624000	65564000	60708000	61105000	49082000	38044000	42429000	70572000	76964000	79824000	31042000	35460000	34303000	48031000	52884000	53884000	35085000	36580000
O08997	ATOX1_MOUSE	Copper transport protein ATOX1 (Metal transport protein ATX1)	Atox1	1	6	6	6	80.192	105	816850000	8.91214	3267400000	9.5142	246450000	273760000	262860000	84433000	125410000	104650000	287220000	361660000	210970000	346020000	394650000	569330000	105	71804000	90414000	52743000	86506000	98662000	142330000	61613000	68441000	65715000	21108000	31353000	26162000	9256600	10114000	7491000	10181000	10068000	12735000	8266400	8412700	9500200	4398700	7073300
Q8K4G1	LTBP4_MOUSE	Latent-transforming growth factor beta-binding protein 4 (LTBP-4)	Ltbp4	1	57	57	57	323.31	106	810830000	8.90893	71353000000	10.8534	9702600000	8897500000	9031700000	4635100000	8449400000	3657300000	1811000000	1970500000	2067300000	5065300000	6730900000	9334100000	106	20580000	22392000	23492000	57560000	76488000	106070000	110260000	101110000	102630000	52672000	96016000	41560000	60598000	65543000	73776000	172460000	182600000	206970000	263870000	239890000	270870000	203350000	401810000
Q9D1R9	RL34_MOUSE	60S ribosomal protein L34	Rpl34	1	2	2	2	3.2898	107	809780000	8.90837	5668500000	9.75347	0	690410000	564130000	3528100	0	1766800	566880000	912120000	797970000	653380000	531190000	947120000	107	80984000	130300000	114000000	93340000	75884000	135300000	0	98629000	80590000	504020	0	252400	22703000	27077000	26832000	23609000	0	0	0	0	0	0	0
P08003	PDIA4_MOUSE	Protein disulfide-isomerase A4 (EC 5.3.4.1) (Endoplasmic reticulum resident protein 72) (ER protein 72) (ERp-72) (ERp72)	Pdia4 Cai Erp72	1	46	46	46	323.31	108	800020000	8.9031	36001000000	10.5563	2467400000	2581800000	2277400000	4847500000	4493200000	3406600000	2441400000	2547100000	2467300000	2260100000	2674000000	3536700000	108	54254000	56602000	54829000	50226000	59423000	78594000	54831000	57373000	50610000	107720000	99849000	75703000	85892000	84584000	98687000	78200000	86057000	80729000	77593000	80623000	90716000	184840000	194610000
P0DP28	CALM3_MOUSE	Calmodulin-3	Calm3 Cam3 Camc	5	7	7	7	312.3	109	764800000	8.88355	6883200000	9.83779	342150000	497980000	329150000	210740000	100340000	138400000	840350000	747100000	798690000	376190000	1311700000	1190500000	109	93372000	83011000	88743000	41799000	145740000	132280000	38016000	55332000	36572000	23416000	11149000	15378000	23928000	23364000	23818000	12825000	32458000	22867000	9741200	13275000	9918300	10834000	8298500
P08121	CO3A1_MOUSE	Collagen alpha-1(III) chain	Col3a1	1	37	37	30	323.31	110	764760000	8.88353	65005000000	10.8129	11425000000	11415000000	9275200000	3774700000	3287700000	2452200000	1350200000	1444400000	1455100000	4882400000	5846900000	8394700000	110	15884000	16993000	17119000	57440000	68787000	98761000	134410000	134300000	109120000	44409000	38679000	28849000	34842000	38471000	41364000	145640000	139160000	158190000	269520000	260710000	239670000	221010000	205070000
Q922R8	PDIA6_MOUSE	Protein disulfide-isomerase A6 (EC 5.3.4.1) (Thioredoxin domain-containing protein 7)	Pdia6 Txndc7	1	18	18	18	323.31	111	753950000	8.87734	19603000000	10.2923	1179900000	1288300000	1367700000	2852400000	2274400000	1875000000	1283600000	1239900000	1498200000	1470200000	1674200000	1599000000	111	49370000	47688000	57622000	56546000	64394000	61498000	45381000	49552000	52605000	109710000	87477000	72117000	42568000	41165000	57202000	51362000	49344000	47239000	32025000	42231000	43783000	112260000	107920000
Q01853	TERA_MOUSE	Transitional endoplasmic reticulum ATPase (TER ATPase) (EC 3.6.4.6) (15S Mg(2+)-ATPase p97 subunit) (Valosin-containing protein) (VCP)	Vcp	1	46	46	46	323.31	112	744720000	8.87199	40960000000	10.6124	3324900000	3432100000	3084200000	2535400000	2484000000	1726500000	3655000000	3456400000	3580700000	3746900000	4746400000	5187400000	112	66454000	62843000	65103000	68125000	86299000	94317000	60454000	62401000	56077000	46098000	45163000	31391000	113360000	110960000	122510000	108990000	126620000	120170000	96970000	96753000	107790000	108470000	112510000
P61979	HNRPK_MOUSE	Heterogeneous nuclear ribonucleoprotein K (hnRNP K)	Hnrnpk Hnrpk	1	23	23	23	323.31	113	744490000	8.87186	21590000000	10.3343	2033800000	1892500000	2066100000	1172200000	961140000	846230000	2157100000	1959300000	2060800000	1817500000	1970400000	2653100000	113	74382000	67563000	71062000	62671000	67944000	91487000	70133000	65260000	71246000	40419000	33143000	29180000	70438000	64075000	71164000	69121000	57247000	59027000	56053000	52750000	60896000	48969000	46956000
P26041	MOES_MOUSE	Moesin (Membrane-organizing extension spike protein)	Msn	1	46	46	31	323.31	114	725790000	8.86081	32661000000	10.514	2886500000	2450100000	2610500000	2299400000	1633800000	1223300000	2666600000	2661400000	2526800000	3128300000	4008700000	4562100000	114	59257000	59143000	56150000	69517000	89083000	101380000	64145000	54447000	58010000	51099000	36306000	27185000	70092000	70458000	66322000	82598000	90509000	87628000	66242000	64725000	71349000	139110000	105330000
Q8CGP2	H2B1P_MOUSE	Histone H2B type 1-P	Hist1h2bp	11	5	5	2	99.766	115	713820000	8.85359	8565800000	9.93277	719040000	910520000	694510000	1180600000	1309700000	372540000	414910000	982180000	468720000	313510000	386380000	781820000	115	34576000	81848000	39060000	26126000	32198000	65152000	59920000	75877000	57876000	98387000	109140000	31045000	13401000	18489000	11752000	20956000	11366000	12566000	18627000	21608000	18730000	64431000	46135000
P62827	RAN_MOUSE	GTP-binding nuclear protein Ran (GTPase Ran) (Ras-like protein TC4) (Ras-related nuclear protein)	Ran Rasl2-8	2	13	13	13	166.49	116	701560000	8.84606	9821900000	9.9922	629790000	657830000	407200000	418430000	322050000	277020000	1420000000	930800000	1199500000	1008100000	1329100000	1221900000	116	101430000	66485000	85677000	72007000	94935000	87277000	44985000	46988000	29086000	29888000	23004000	19787000	35962000	32312000	32899000	33962000	33756000	33564000	22228000	22625000	22863000	16832000	18654000
Q9R1E6	ENPP2_MOUSE	Ectonucleotide pyrophosphatase/phosphodiesterase family member 2 (E-NPP 2) (EC 3.1.4.39) (Autotaxin) (Extracellular lysophospholipase D) (LysoPLD)	Enpp2 Npps2 Pdnp2	1	47	47	47	323.31	117	700050000	8.84513	41303000000	10.616	4907600000	5861800000	4694900000	1269900000	6500600000	3675200000	65534000	52686000	107830000	4238900000	4210800000	5716700000	117	1110800	892980	1827700	71846000	71369000	96894000	83180000	99352000	79575000	21524000	110180000	62291000	2755300	2205300	4713600	102690000	100140000	130120000	155580000	175110000	147180000	53549000	262450000
P70349	HINT1_MOUSE	Histidine triad nucleotide-binding protein 1 (EC 3.-.-.-) (Adenosine 5'-monophosphoramidase) (Protein kinase C inhibitor 1) (Protein kinase C-interacting protein 1) (PKCI-1)	Hint1 Hint Pkci Pkci1 Prkcnh1	1	9	9	9	187.78	118	694730000	8.84182	6252600000	9.79606	541870000	501780000	464640000	378930000	277970000	224650000	511670000	474720000	370130000	772950000	779410000	953860000	118	56852000	52747000	41126000	85883000	86601000	105980000	60208000	55753000	51627000	42103000	30886000	24962000	17641000	15262000	14533000	16224000	22525000	25087000	17083000	15790000	16451000	15103000	12351000
Q9CQV8	1433B_MOUSE	14-3-3 protein beta/alpha (Protein kinase C inhibitor protein 1) (KCIP-1) [Cleaved into: 14-3-3 protein beta/alpha, N-terminally processed]	Ywhab	1	17	12	10	323.31	119	689420000	8.83848	14478000000	10.1607	971760000	718050000	638670000	723980000	914080000	576780000	1552300000	1566400000	1243500000	1694500000	2092400000	1785000000	119	73917000	74588000	59216000	80692000	99637000	84999000	46274000	34193000	30413000	34475000	43528000	27466000	42994000	41465000	40882000	56583000	53498000	42366000	29762000	29812000	31328000	33368000	44697000
P14206	RSSA_MOUSE	40S ribosomal protein SA (37 kDa laminin receptor precursor) (37LRP) (37 kDa oncofetal antigen) (37/67 kDa laminin receptor) (LRP/LR) (67 kDa laminin receptor) (67LR) (Laminin receptor 1) (LamR) (Laminin-binding protein precursor p40) (LBP/p40) (OFA/iLRP)	Rpsa Lamr1 P40-8	1	14	14	14	229.45	120	688700000	8.83803	11708000000	10.0685	870000000	846100000	932310000	426810000	314690000	203720000	2022400000	1821900000	1533100000	798200000	843370000	1094200000	120	118970000	107170000	90184000	46953000	49610000	64363000	51176000	49770000	54842000	25106000	18511000	11984000	61324000	58781000	53287000	26774000	22535000	23248000	25489000	25914000	30541000	21643000	15849000
P60843	IF4A1_MOUSE	Eukaryotic initiation factor 4A-I (eIF-4A-I) (eIF4A-I) (EC 3.6.4.13) (ATP-dependent RNA helicase eIF4A-1)	Eif4a1 Ddx2a Eif4a	1	26	26	13	323.31	121	668700000	8.82523	18724000000	10.2724	1244400000	1332500000	1080600000	549610000	606600000	526810000	2489900000	2482900000	2201300000	1701000000	1882000000	2625900000	121	88925000	88676000	78618000	60748000	67215000	93781000	44444000	47589000	38593000	19629000	21664000	18815000	79302000	77671000	77301000	46031000	53466000	59011000	35465000	35710000	42348000	24213000	28344000
Q9R1Q9	VAS1_MOUSE	V-type proton ATPase subunit S1 (V-ATPase subunit S1) (Protein C7-1) (V-ATPase Ac45 subunit) (V-ATPase S1 accessory protein) (Vacuolar proton pump subunit S1)	Atp6ap1 Atp6ip1 Atp6s1	1	9	9	9	290.55	122	663930000	8.82212	11287000000	10.0526	1839200000	1821600000	1588800000	545420000	834810000	416240000	456800000	512590000	432570000	669470000	877590000	1291100000	122	26871000	30152000	25445000	39380000	51623000	75949000	108190000	107150000	93458000	32083000	49107000	24485000	14759000	16930000	14999000	19167000	23039000	28733000	49938000	49637000	46361000	25344000	39072000
P12023	A4_MOUSE	Amyloid-beta A4 protein (ABPP) (APP) (Alzheimer disease amyloid A4 protein homolog) (Amyloid precursor protein) (Amyloid-beta precursor protein) (Amyloidogenic glycoprotein) (AG) [Cleaved into: N-APP; Soluble APP-alpha (S-APP-alpha); Soluble APP-beta (S-APP-beta); C99 (APP-C99) (Beta-secretase C-terminal fragment) (Beta-CTF); Amyloid-beta protein 42 (Abeta42) (Beta-APP42); Amyloid-beta protein 40…	App	1	26	26	24	323.31	123	663230000	8.82166	31172000000	10.4938	4134100000	4216200000	3643300000	1523200000	2870300000	1440000000	1502900000	1824400000	1540900000	1796400000	2490800000	4188800000	123	31977000	38818000	32785000	38222000	52995000	89124000	87960000	89706000	77516000	32408000	61071000	30639000	47472000	53569000	51485000	58357000	71475000	92778000	112410000	113620000	108920000	62301000	123680000
P24369	PPIB_MOUSE	Peptidyl-prolyl cis-trans isomerase B (PPIase B) (EC 5.2.1.8) (CYP-S1) (Cyclophilin B) (Rotamase B) (S-cyclophilin) (SCYLP)	Ppib	1	15	15	15	234.2	124	656650000	8.81733	11820000000	10.0726	904330000	925510000	776640000	1195200000	1195600000	816980000	895500000	958470000	855570000	585170000	1087000000	1623600000	124	49750000	53248000	47532000	32509000	60391000	90202000	50241000	51417000	43147000	66398000	66423000	45388000	28727000	26863000	29128000	25308000	27550000	33717000	25647000	25585000	24757000	46477000	52692000
P57780	ACTN4_MOUSE	Alpha-actinin-4 (Non-muscle alpha-actinin 4)	Actn4	1	52	52	36	323.31	125	646390000	8.81049	41369000000	10.6167	4078900000	4157600000	3646700000	2083200000	1655000000	1403900000	4149300000	3938200000	4031500000	3222800000	3888900000	5103400000	125	64833000	61534000	62992000	50357000	60764000	79741000	63732000	64962000	56980000	32550000	25860000	21935000	125820000	121020000	129360000	91470000	110020000	116640000	114340000	113340000	111950000	97196000	80425000
Q60605	MYL6_MOUSE	Myosin light polypeptide 6 (17 kDa myosin light chain) (LC17) (Myosin light chain 3) (MLC-3) (Myosin light chain alkali 3) (Myosin light chain A3) (Smooth muscle and nonmuscle myosin light chain alkali 6)	Myl6 Myln	2	8	8	8	133.39	126	639410000	8.80578	8312400000	9.91973	681190000	706610000	695650000	430020000	326350000	263060000	831460000	825650000	749730000	786290000	891140000	1124800000	126	63959000	63511000	57672000	60484000	68549000	86520000	52399000	54355000	53512000	33079000	25104000	20236000	27273000	26848000	26835000	21651000	26457000	25218000	19191000	18479000	20534000	19488000	16279000
P10107	ANXA1_MOUSE	Annexin A1 (Annexin I) (Annexin-1) (Calpactin II) (Calpactin-2) (Chromobindin-9) (Lipocortin I) (Phospholipase A2 inhibitory protein) (p35)	Anxa1 Anx1 Lpc-1 Lpc1	1	31	31	31	323.31	127	637510000	8.80449	20400000000	10.3096	1694600000	1741900000	1738800000	396440000	223720000	165360000	2482800000	2372300000	1847100000	2133700000	2274800000	3294600000	127	77588000	74133000	57722000	66678000	71087000	102960000	52955000	54434000	54336000	12389000	6991100	5167500	74352000	68702000	66391000	88179000	63867000	67492000	41563000	41960000	39582000	24750000	13088000
Q60854	SPB6_MOUSE	Serpin B6 (Placental thrombin inhibitor) (Proteinase inhibitor 6) (PI-6)	Serpinb6 Serpinb6a Spi3	1	21	21	21	323.31	128	632640000	8.80116	17081000000	10.2325	1333300000	1097900000	1323300000	814250000	910140000	875750000	1453500000	1296600000	1114300000	1806300000	2438100000	2617000000	128	53833000	48021000	41269000	66898000	90300000	96928000	49382000	40664000	49013000	30157000	33709000	32435000	45739000	42768000	36649000	46522000	62785000	54013000	38139000	33027000	41234000	45214000	40967000
O08709	PRDX6_MOUSE	Peroxiredoxin-6 (EC 1.11.1.15) (1-Cys peroxiredoxin) (1-Cys PRX) (Acidic calcium-independent phospholipase A2) (aiPLA2) (EC 3.1.1.4) (Antioxidant protein 2) (Non-selenium glutathione peroxidase) (NSGPx)	Prdx6 Aop2 Ltw4 Prdx5	1	16	16	16	147.22	129	621230000	8.79325	11803000000	10.072	1029500000	980070000	932120000	470220000	538370000	322080000	1055900000	966640000	819880000	1136000000	1448900000	2093200000	129	55575000	50876000	43152000	59790000	76256000	110170000	54183000	51583000	49059000	24748000	28335000	16952000	32856000	30864000	28593000	38212000	38909000	43525000	27293000	24851000	27301000	21014000	26614000
Q02788	CO6A2_MOUSE	Collagen alpha-2(VI) chain	Col6a2	1	35	35	35	323.31	130	620130000	8.79248	46510000000	10.6675	3818600000	3656500000	3176500000	2820300000	2141400000	2278300000	4604100000	5310400000	5037400000	3551600000	3795000000	6319700000	130	61388000	70805000	67166000	47354000	50600000	84262000	50915000	48754000	42354000	37604000	28552000	30377000	138540000	161690000	164140000	105410000	107760000	138420000	110830000	112680000	104680000	121390000	97991000
P63158	HMGB1_MOUSE	High mobility group protein B1 (High mobility group protein 1) (HMG-1)	Hmgb1 Hmg-1 Hmg1	1	17	17	17	255.32	131	617570000	8.79069	8028500000	9.90463	609020000	575020000	597320000	456070000	238180000	167050000	1065800000	933340000	894690000	709220000	848360000	934400000	131	81986000	71795000	68822000	54555000	65258000	71877000	46847000	44232000	45948000	35082000	18322000	12850000	34833000	31190000	28139000	21635000	23348000	21885000	18630000	17522000	19233000	18848000	12344000
Q6IRU2	TPM4_MOUSE	Tropomyosin alpha-4 chain (Tropomyosin-4)	Tpm4	1	22	19	19	323.31	132	613720000	8.78797	14729000000	10.1682	1579700000	1587400000	1529900000	1285900000	1008900000	801100000	688260000	702770000	739950000	1229000000	1539900000	2036400000	132	28677000	29282000	30831000	51207000	64162000	84852000	65823000	66141000	63747000	53580000	42036000	33379000	25207000	24565000	27504000	42893000	43866000	44506000	45966000	44556000	48517000	51546000	55020000
P17918	PCNA_MOUSE	Proliferating cell nuclear antigen (PCNA) (Cyclin)	Pcna	1	15	15	15	318.55	133	613570000	8.78786	11658000000	10.0666	723220000	740200000	850270000	405170000	371120000	232180000	1601100000	1425600000	1578200000	1097900000	1291900000	1340900000	133	84269000	75031000	83062000	57785000	67997000	70573000	38064000	38958000	44751000	21325000	19533000	12220000	43059000	39911000	47423000	33400000	29667000	31499000	24541000	25259000	28589000	18274000	18424000
P99024	TBB5_MOUSE	Tubulin beta-5 chain	Tubb5	1	26	6	5	75.598	134	598560000	8.77711	13168000000	10.1195	1059700000	1168900000	1166600000	377280000	314130000	241980000	1823700000	1823900000	1503500000	945740000	1273800000	1465800000	134	82895000	82906000	68340000	42988000	57901000	66629000	48168000	53132000	53026000	17149000	14278000	10999000	57721000	61783000	53376000	29801000	35504000	30597000	27148000	29550000	31689000	17545000	15093000
P68254	1433T_MOUSE	14-3-3 protein theta (14-3-3 protein tau)	Ywhaq	1	19	15	14	323.31	135	598520000	8.77708	12569000000	10.0993	923260000	960420000	944370000	735090000	732090000	628780000	1124500000	1078900000	964050000	1224300000	1495600000	1757500000	135	53547000	51375000	45907000	58300000	71219000	83690000	43965000	45735000	44970000	35004000	34862000	29942000	34558000	35439000	31808000	47560000	40011000	42302000	29082000	31739000	31566000	31358000	33542000
P31786	ACBP_MOUSE	Acyl-CoA-binding protein (ACBP) (Diazepam-binding inhibitor) (DBI) (Endozepine) (EP)	Dbi	1	7	7	7	97.274	136	593130000	8.77315	5338100000	9.72739	483550000	442940000	385700000	155810000	122330000	100240000	427640000	530910000	317100000	419330000	735240000	1217400000	136	47516000	58990000	35233000	46592000	81693000	135260000	53728000	49216000	42855000	17312000	13593000	11138000	13454000	15841000	11183000	10574000	19633000	23466000	15037000	13307000	15088000	7745700	6297900
P62242	RS8_MOUSE	40S ribosomal protein S8	Rps8	1	12	12	12	282.03	137	583300000	8.76589	8749600000	9.94199	592580000	441270000	360330000	323290000	152990000	120780000	1744300000	1714400000	1446900000	502440000	616760000	731870000	137	116290000	114290000	96458000	33496000	41117000	48791000	39505000	29418000	24022000	21553000	10199000	8052100	51669000	51154000	46225000	18725000	15866000	16873000	16565000	15456000	16553000	14487000	9949600
P06797	CATL1_MOUSE	Cathepsin L1 (EC 3.4.22.15) (Cathepsin L) (Major excreted protein) (MEP) (p39 cysteine proteinase) [Cleaved into: Cathepsin L1 heavy chain; Cathepsin L1 light chain]	Ctsl Ctsl1	1	15	15	15	242.51	138	581990000	8.76492	9311900000	9.96904	1023300000	981280000	858150000	275520000	727470000	151910000	791150000	873720000	720280000	478270000	1024100000	1406800000	138	49447000	54607000	45018000	29892000	64006000	87924000	63954000	61330000	53635000	17220000	45467000	9494500	24213000	26711000	24481000	14003000	25407000	28497000	24079000	23827000	22646000	15870000	33852000
P70663	SPRL1_MOUSE	SPARC-like protein 1 (Extracellular matrix protein 2) (Matrix glycoprotein Sc1)	Sparcl1 Ecm2 Sc1	1	33	33	32	323.31	139	577330000	8.76142	23670000000	10.3742	3916300000	4284700000	3245500000	1455000000	2016500000	1147400000	77236000	79415000	108330000	2300000000	1859200000	3180600000	139	1883800	1936900	2642100	56098000	45347000	77577000	95519000	104510000	79159000	35488000	49184000	27986000	3070900	3397100	4790200	75439000	56968000	76977000	109240000	124320000	100580000	65393000	95934000
Q00731	VEGFA_MOUSE	Vascular endothelial growth factor A (VEGF-A) (Vascular permeability factor) (VPF)	Vegfa Vegf	1	5	5	5	103.56	140	577150000	8.76129	6925800000	9.84047	1295300000	1355200000	1275100000	284300000	442610000	221680000	169960000	172120000	204310000	329300000	462080000	713820000	140	14164000	14343000	17026000	27442000	38507000	59485000	107940000	112940000	106260000	23692000	36884000	18473000	4760400	5434000	7246800	8967100	11005000	17634000	42177000	36770000	38286000	11954000	20156000
P58252	EF2_MOUSE	Elongation factor 2 (EF-2)	Eef2	1	50	50	49	323.31	141	575030000	8.75969	35652000000	10.5521	2668600000	2643200000	2593700000	2089100000	1676000000	1306300000	3670700000	3500700000	3022300000	3457700000	3983100000	5029400000	141	59205000	56463000	48746000	55770000	64243000	81120000	43043000	42632000	41834000	33695000	27031000	21070000	119780000	131080000	111030000	115260000	123550000	129290000	76949000	80507000	59949000	63573000	77043000
Q8BMS2	SPON2_MOUSE	Spondin-2 (Mindin)	Spon2	1	10	10	10	116.44	142	566930000	8.75353	10205000000	10.0088	1466500000	1492400000	1138500000	772700000	1349000000	537290000	134190000	130770000	166990000	961830000	796800000	1257800000	142	7454900	7265100	9277100	53435000	44267000	69878000	81472000	82911000	63248000	42928000	74942000	29850000	6424900	7188100	7879300	26407000	24320000	25548000	35375000	45025000	35330000	31231000	56185000
P28798	GRN_MOUSE	Granulins (PC cell-derived growth factor) (PCDGF) (Proepithelin) (PEPI) [Cleaved into: Acrogranin (Progranulin); Granulin-1; Granulin-2; Granulin-3; Granulin-4; Granulin-5; Granulin-6; Granulin-7]	Grn	1	25	25	25	244.21	143	565030000	8.75207	15256000000	10.1834	2759200000	2387000000	2052500000	323860000	1297000000	373720000	498940000	565860000	576670000	771030000	1121200000	2528700000	143	18479000	20958000	21358000	28557000	41524000	93655000	102190000	88407000	76020000	11995000	48039000	13842000	18212000	21754000	20925000	26121000	31294000	50594000	72621000	62947000	58886000	18507000	65418000
Q8BND5	QSOX1_MOUSE	Sulfhydryl oxidase 1 (mSOx) (EC 1.8.3.2) (Quiescin Q6) (Skin sulfhydryl oxidase)	Qsox1 Qscn6 Sox	1	32	32	32	323.31	144	563550000	8.75093	27614000000	10.4411	3395300000	3519300000	2813400000	3103600000	2969400000	1726500000	981960000	1069700000	1091400000	1948400000	2006700000	2988500000	144	20040000	21830000	22274000	39762000	40953000	60989000	69293000	71823000	57416000	63338000	60601000	35236000	31309000	35918000	37837000	65695000	55952000	70122000	100070000	99790000	99391000	126930000	133940000
P06745	G6PI_MOUSE	Glucose-6-phosphate isomerase (GPI) (EC 5.3.1.9) (Autocrine motility factor) (AMF) (Neuroleukin) (NLK) (Phosphoglucose isomerase) (PGI) (Phosphohexose isomerase) (PHI)	Gpi Gpi1	2	25	25	25	323.31	145	559130000	8.74751	22365000000	10.3496	2087000000	2050700000	1997900000	2246300000	1606100000	1261800000	1058600000	1043100000	763220000	2397000000	2785900000	3063000000	145	26465000	26077000	19080000	59926000	69649000	76576000	52175000	51268000	49948000	56157000	40152000	31546000	22716000	21924000	20709000	93696000	49590000	48774000	37094000	35392000	37708000	124500000	97661000
Q9CPU0	LGUL_MOUSE	Lactoylglutathione lyase (EC 4.4.1.5) (Aldoketomutase) (Glyoxalase I) (Glx I) (Ketone-aldehyde mutase) (Methylglyoxalase) (S-D-lactoylglutathione methylglyoxal lyase)	Glo1	1	11	11	11	57.197	146	557590000	8.74631	7806300000	9.89245	790300000	745270000	815170000	166350000	168430000	105210000	635080000	697020000	497110000	427280000	1164000000	1595100000	146	45363000	49787000	35508000	30520000	83146000	113930000	56450000	53233000	58227000	11882000	12031000	7515300	18989000	20545000	16202000	11979000	27500000	29392000	19142000	17644000	20158000	7203800	7536800
Q99LX0	PARK7_MOUSE	Protein/nucleic acid deglycase DJ-1 (EC 3.1.2.-) (EC 3.5.1.-) (EC 3.5.1.124) (Maillard deglycase) (Parkinson disease protein 7 homolog) (Parkinsonism-associated deglycase) (Protein DJ-1) (DJ-1)	Park7	1	12	12	12	175.15	147	551730000	8.74173	7724300000	9.88786	800950000	675810000	608620000	505390000	632240000	292270000	406170000	418870000	449770000	738470000	937630000	1257500000	147	29012000	29919000	32126000	52748000	66974000	89820000	57211000	48272000	43473000	36099000	45160000	20876000	14346000	15663000	15481000	20038000	23965000	24691000	19916000	17052000	16446000	24895000	25830000
P40142	TKT_MOUSE	Transketolase (TK) (EC 2.2.1.1) (P68)	Tkt	1	31	31	31	323.31	148	546870000	8.73788	22422000000	10.3507	1613600000	1648500000	1602500000	1708300000	1332400000	1014500000	2045400000	1934000000	1761700000	2296000000	2543300000	2919800000	148	49887000	47172000	42969000	56000000	62033000	71214000	39357000	40206000	39085000	41666000	32498000	24744000	62006000	61025000	58993000	65591000	69692000	74501000	51165000	58953000	57906000	71624000	61709000
P04223	HA1K_MOUSE	H-2 class I histocompatibility antigen, K-K alpha chain (H-2K(K))	H2-K1 H2-K	1	14	14	6	151.34	149	546320000	8.73745	13112000000	10.1177	1706700000	2161600000	1401000000	1742600000	768840000	553010000	335820000	350050000	442820000	984380000	1319700000	1345300000	149	13993000	14586000	18451000	41016000	54988000	56053000	71112000	90067000	58374000	72609000	32035000	23042000	12466000	13899000	14848000	29325000	30693000	37853000	48865000	59121000	45463000	67305000	39116000
P35762	CD81_MOUSE	CD81 antigen (26 kDa cell surface protein TAPA-1) (Target of the antiproliferative antibody 1) (CD antigen CD81)	Cd81 Tapa1	1	4	4	4	287.51	150	546020000	8.73721	5460200000	9.73721	709460000	676440000	572230000	546460000	186860000	223570000	274500000	468790000	374080000	308530000	449470000	669860000	150	27450000	46879000	37408000	30853000	44947000	66986000	70946000	67644000	57223000	54646000	18686000	22357000	11380000	14586000	12905000	8806900	11954000	13625000	17853000	16847000	15232000	22303000	8865800
P11152	LIPL_MOUSE	Lipoprotein lipase (LPL) (EC 3.1.1.34)	Lpl	1	16	16	16	162.92	151	539500000	8.73199	16185000000	10.2091	2436100000	2148200000	1948300000	1767900000	930870000	1019000000	379440000	397990000	400160000	1330700000	1379000000	2047000000	151	12648000	13266000	13339000	44356000	45967000	68232000	81204000	71606000	64945000	58930000	31029000	33967000	12606000	14592000	13732000	39402000	38551000	49090000	67823000	64268000	62320000	66993000	37867000
Q8BG05	ROA3_MOUSE	Heterogeneous nuclear ribonucleoprotein A3 (hnRNP A3)	Hnrnpa3 Hnrpa3	1	22	22	22	323.31	152	537050000	8.73001	14500000000	10.1614	1166100000	1234500000	1201400000	677770000	503300000	400080000	1814600000	1801900000	1810200000	1278000000	1277100000	1334400000	152	67208000	66737000	67044000	47332000	47299000	49421000	43189000	45723000	44496000	25103000	18641000	14818000	50890000	50340000	57943000	38935000	37061000	32418000	33364000	29905000	33781000	29503000	24249000
Q60817	NACA_MOUSE	Nascent polypeptide-associated complex subunit alpha (Alpha-NAC) (Alpha-NAC/1.9.2)	Naca	2	5	5	5	111.2	153	536820000	8.72983	3757800000	9.57493	269940000	302270000	306670000	97121000	168530000	53076000	435570000	378630000	392380000	364110000	459740000	529740000	153	62225000	54090000	56055000	52015000	65677000	75677000	38562000	43182000	43809000	13874000	24076000	7582200	16383000	13910000	15916000	11035000	12679000	10481000	7894400	6936600	7983200	5013300	7314600
Q9WVA4	TAGL2_MOUSE	Transgelin-2 (SM22-beta)	Tagln2 Kiaa0120	1	13	13	12	211.25	154	536080000	8.72923	8577400000	9.93336	501160000	473490000	457210000	413090000	325380000	269340000	1117500000	1128700000	1009200000	866780000	1016000000	999400000	154	69842000	70543000	63074000	54174000	63499000	62462000	31322000	29593000	28576000	25818000	20336000	16834000	36513000	35336000	32473000	23535000	26023000	25341000	17229000	16770000	19241000	18732000	14586000
P97822	AN32E_MOUSE	Acidic leucine-rich nuclear phosphoprotein 32 family member E (Cerebellar postnatal development protein 1) (LANP-like protein) (LANP-L)	Anp32e Cpd1	1	8	8	8	218.65	155	531520000	8.72552	5315200000	9.72552	361340000	410440000	384730000	290020000	288950000	201300000	558340000	566640000	496270000	402750000	616620000	737800000	155	55834000	56664000	49627000	40275000	61662000	73780000	36134000	41044000	38473000	29002000	28895000	20130000	17229000	17974000	17627000	14203000	18347000	16747000	9496600	11190000	11418000	15520000	13866000
O09131	GSTO1_MOUSE	Glutathione S-transferase omega-1 (GSTO-1) (EC 2.5.1.18) (Glutathione S-transferase omega 1-1) (GSTO 1-1) (Glutathione-dependent dehydroascorbate reductase) (EC 1.8.5.1) (Monomethylarsonic acid reductase) (MMA(V) reductase) (EC 1.20.4.2) (S-(Phenacyl)glutathione reductase) (SPG-R) (p28)	Gsto1 Gstx Gtsttl	2	18	18	18	251.83	156	527260000	8.72202	9490600000	9.97729	639680000	624780000	647130000	255570000	369310000	202070000	1085600000	1096900000	874260000	910960000	1041900000	1742500000	156	60312000	60937000	48570000	50609000	57881000	96806000	35538000	34710000	35952000	14199000	20517000	11226000	34056000	36612000	30708000	30040000	31217000	35623000	17518000	18256000	19030000	13198000	17974000
P62858	RS28_MOUSE	40S ribosomal protein S28	Rps28	1	2	2	2	29.843	157	521530000	8.71728	2607600000	9.41624	273010000	289950000	284460000	73452000	54591000	28756000	461950000	466480000	182320000	84740000	105290000	302640000	157	92390000	93295000	36463000	16948000	21057000	60529000	54602000	57990000	56891000	14690000	10918000	5751100	15052000	15105000	0	0	0	6802900	7454800	7761600	8416600	0	0
P19157	GSTP1_MOUSE	Glutathione S-transferase P 1 (Gst P1) (EC 2.5.1.18) (GST YF-YF) (GST class-pi) (GST-piB) (Preadipocyte growth factor)	Gstp1 Gstpib	2	11	11	11	213.86	158	520600000	8.7165	7288400000	9.86263	537600000	434420000	564480000	306150000	273250000	198580000	675310000	716940000	554880000	752940000	1133900000	1140000000	158	48236000	51210000	39634000	53781000	80995000	81426000	38400000	31030000	40320000	21868000	19518000	14185000	15614000	15310000	13452000	26927000	24067000	23728000	15787000	13245000	16259000	15508000	13525000
Q9CYN9	RENR_MOUSE	Renin receptor (ATPase H(+)-transporting lysosomal accessory protein 2) (ATPase H(+)-transporting lysosomal-interacting protein 2) (Renin/prorenin receptor)	Atp6ap2 Atp6ip2	1	15	15	15	135.15	159	516650000	8.7132	9299700000	9.96847	1341600000	1333100000	1151600000	606810000	775250000	434850000	405400000	413040000	352290000	667860000	696560000	1121300000	159	22522000	22947000	19572000	37103000	38698000	62296000	74536000	74059000	63980000	33712000	43069000	24159000	12560000	13447000	14001000	22062000	20709000	24889000	37412000	37068000	36438000	25699000	33236000
P05017	IGF1_MOUSE	Insulin-like growth factor I (IGF-I) (Somatomedin)	Igf1 Igf-1	1	4	4	4	67.168	160	512900000	8.71003	5129000000	9.71003	774270000	748810000	615320000	309030000	871450000	380730000	0	0	0	490530000	373570000	565250000	160	0	0	0	49053000	37357000	56525000	77427000	74881000	61532000	30903000	87145000	38073000	0	0	0	19106000	11582000	10010000	17341000	18007000	14250000	16594000	46086000
P25785	TIMP2_MOUSE	Metalloproteinase inhibitor 2 (Tissue inhibitor of metalloproteinases 2) (TIMP-2)	Timp2 Timp-2	1	16	16	16	323.31	161	511980000	8.70925	9215700000	9.96453	1206100000	1157600000	861220000	676910000	880270000	374130000	417890000	502510000	421020000	854690000	790880000	1071200000	161	23216000	27917000	23390000	47483000	43938000	59511000	67005000	64312000	47845000	37606000	48904000	20785000	14890000	16004000	13636000	23915000	20699000	24716000	39007000	34098000	28947000	29784000	35575000
Q69Z23	DYH17_MOUSE	Dynein heavy chain 17, axonemal (Axonemal beta dynein heavy chain 17) (Ciliary dynein heavy chain 17)	Dnah17 Dnahc17 Kiaa3028	1	2	2	2	2.3104	162	509410000	8.70707	165050000000	11.2176	20623000000	21051000000	19244000000	2059000000	5314800000	1783000000	17771000000	19031000000	15938000000	4610000000	13608000000	19245000000	162	54848000	58738000	49192000	14228000	41999000	59399000	63651000	64972000	59395000	6354900	16404000	5503100	0	0	0	0	0	0	561360000	0	0	0	0
O70251	EF1B_MOUSE	Elongation factor 1-beta (EF-1-beta)	Eef1b Eef1b2	1	10	9	9	307.87	163	507380000	8.70533	7610700000	9.88142	506860000	540770000	556010000	311430000	259660000	213300000	1052300000	1025400000	923880000	558810000	792450000	869800000	163	70153000	68359000	61592000	37254000	52830000	57987000	33791000	36051000	37068000	20762000	17311000	14220000	32949000	31848000	30164000	18171000	20737000	22008000	16089000	16929000	19638000	14061000	13431000
P19324	SERPH_MOUSE	Serpin H1 (47 kDa heat shock protein) (Collagen-binding protein) (Colligin) (Serine protease inhibitor J6)	Serpinh1 Cbp1 Hsp47	1	20	20	20	322.31	164	494650000	8.6943	14839000000	10.1714	770280000	869520000	890430000	771170000	729700000	674190000	2503900000	2500000000	2766500000	729210000	709970000	924420000	164	83464000	83333000	92216000	24307000	23666000	30814000	25676000	28984000	29681000	25706000	24323000	22473000	78485000	77718000	88565000	24355000	23668000	24698000	27941000	28038000	31666000	41959000	33529000
P62908	RS3_MOUSE	40S ribosomal protein S3 (EC 4.2.99.18)	Rps3	1	15	15	15	117.06	165	492060000	8.69202	10333000000	10.0142	676960000	714820000	736160000	483160000	343120000	250930000	1649200000	1793400000	1413300000	687340000	755850000	829010000	165	78532000	85398000	67302000	32731000	35993000	39477000	32236000	34039000	35055000	23008000	16339000	11949000	52443000	54917000	50301000	21252000	20727000	21064000	21556000	21202000	24850000	21908000	14629000
O08807	PRDX4_MOUSE	Peroxiredoxin-4 (EC 1.11.1.15) (Antioxidant enzyme AOE372) (Peroxiredoxin IV) (Prx-IV) (Thioredoxin peroxidase AO372) (Thioredoxin-dependent peroxide reductase A0372)	Prdx4	1	13	11	11	49.221	166	492050000	8.69201	9348900000	9.97076	705160000	773380000	894430000	753240000	636100000	423460000	655280000	760560000	634860000	765480000	1058100000	1288800000	166	34489000	40029000	33414000	40289000	55691000	67833000	37114000	40704000	47075000	39644000	33479000	22287000	16287000	16811000	20383000	23202000	22451000	19156000	17810000	16840000	21650000	47100000	41413000
Q61171	PRDX2_MOUSE	Peroxiredoxin-2 (EC 1.11.1.15) (Thiol-specific antioxidant protein) (TSA) (Thioredoxin peroxidase 1) (Thioredoxin-dependent peroxide reductase 1)	Prdx2 Tdpx1 Tpx	1	9	9	9	57.66	167	487650000	8.68811	7314700000	9.8642	674820000	641340000	588950000	507400000	402590000	326450000	530470000	514280000	450460000	830250000	760370000	1058400000	167	35365000	34285000	30031000	55350000	50691000	70561000	44988000	42756000	39263000	33826000	26839000	21763000	20504000	19920000	17501000	22492000	21676000	25661000	18380000	19665000	19113000	17354000	18223000
Q8R180	ERO1A_MOUSE	ERO1-like protein alpha (ERO1-L) (ERO1-L-alpha) (EC 1.8.4.-) (Endoplasmic reticulum oxidoreductase alpha) (Endoplasmic reticulum oxidoreductin-1-like protein) (Oxidoreductin-1-L-alpha)	Ero1a Ero1l	2	25	25	25	292.3	168	487500000	8.68797	19500000000	10.29	1417200000	1440000000	1505600000	4023100000	2407400000	2570300000	291140000	288880000	286300000	1528000000	2125500000	1616600000	168	7278400	7222000	7157400	38200000	53139000	40414000	35429000	35999000	37639000	100580000	60184000	64258000	11484000	10960000	12970000	50177000	61984000	43331000	45894000	41841000	54467000	174990000	110210000
Q61599	GDIR2_MOUSE	Rho GDP-dissociation inhibitor 2 (Rho GDI 2) (D4) (Rho-GDI beta)	Arhgdib Gdid4	1	11	11	11	244.92	169	478590000	8.67996	7657500000	9.88409	499730000	503760000	695930000	442760000	351060000	309070000	596890000	640430000	457170000	749700000	1179600000	1231400000	169	37306000	40027000	28573000	46856000	73722000	76965000	31233000	31485000	43496000	27673000	21941000	19317000	20247000	21692000	16640000	19634000	28331000	29787000	17528000	17639000	20402000	19371000	17534000
Q9DAR7	DCPS_MOUSE	m7GpppX diphosphatase (EC 3.6.1.59) (DCS-1) (Decapping scavenger enzyme) (Hint-related 7meGMP-directed hydrolase) (Histidine triad nucleotide-binding protein 5) (Histidine triad protein member 5) (HINT-5) (Scavenger mRNA-decapping enzyme DcpS)	Dcps Dcs1 Hint5	1	11	11	11	176.32	170	474760000	8.67647	11394000000	10.0567	174710000	199770000	115740000	3086500000	2118100000	1669100000	150430000	138770000	85531000	3163700000	196930000	294880000	170	6267700	5782200	3563800	131820000	8205600	12287000	7279700	8323800	4822400	128600000	88253000	69547000	44893000	36547000	33720000	43079000	54139000	53679000	35432000	39337000	33845000	50510000	47719000
Q9R0Q7	TEBP_MOUSE	Prostaglandin E synthase 3 (EC 5.3.99.3) (Cytosolic prostaglandin E2 synthase) (cPGES) (Hsp90 co-chaperone) (Progesterone receptor complex p23) (Sid 3177) (Telomerase-binding protein p23)	Ptges3 Sid3177 Tebp	1	7	7	7	72.525	171	470460000	8.67252	4704600000	9.67252	334630000	355520000	379790000	158070000	168140000	143820000	583390000	546020000	459980000	427810000	523060000	624400000	171	58339000	54602000	45998000	42781000	52306000	62440000	33463000	35552000	37979000	15807000	16814000	14382000	20403000	20277000	18410000	11008000	16401000	15780000	10166000	10117000	11845000	5194100	6242200
P49312	ROA1_MOUSE	Heterogeneous nuclear ribonucleoprotein A1 (hnRNP A1) (HDP-1) (Helix-destabilizing protein) (Single-strand-binding protein) (Topoisomerase-inhibitor suppressed) (hnRNP core protein A1) [Cleaved into: Heterogeneous nuclear ribonucleoprotein A1, N-terminally processed]	Hnrnpa1 Fli-2 Hnrpa1 Tis	1	18	18	18	189.71	172	468370000	8.67059	11241000000	10.0508	665050000	457070000	407310000	584490000	595340000	468360000	1618800000	1269200000	1683600000	1324800000	1279500000	884340000	172	67451000	52884000	70151000	55200000	53314000	36848000	27710000	19045000	16971000	24354000	24806000	19515000	48682000	30001000	56446000	42837000	24344000	19845000	21085000	13001000	14851000	28080000	29448000
P14152	MDHC_MOUSE	Malate dehydrogenase, cytoplasmic (EC 1.1.1.37) (Cytosolic malate dehydrogenase)	Mdh1 Mor2	1	12	12	12	212.83	173	467910000	8.67016	10762000000	10.0319	983780000	933530000	872550000	653540000	585330000	526760000	761100000	729800000	596070000	1101400000	1197300000	1815900000	173	33091000	31730000	25916000	47888000	52056000	78953000	42773000	40588000	37937000	28415000	25449000	22903000	26272000	23530000	21038000	32817000	32740000	37650000	26670000	25269000	26848000	34867000	30800000
Q9Z1P8	ANGL4_MOUSE	Angiopoietin-related protein 4 (425O18-1) (Angiopoietin-like protein 4) (Fasting-induced adipose factor) (Hepatic fibrinogen/angiopoietin-related protein) (HFARP) (Secreted protein Bk89)	Angptl4 Farp Fiaf Ng27	1	16	16	16	323.31	174	467380000	8.66967	10750000000	10.0314	968680000	893020000	953210000	1198600000	580260000	449590000	784500000	758120000	821900000	1103600000	996540000	1241800000	174	34109000	32962000	35735000	47984000	43328000	53990000	42116000	38827000	41444000	52114000	25229000	19547000	21728000	22734000	23607000	29983000	25892000	25275000	29133000	25596000	30423000	45077000	26127000
P24452	CAPG_MOUSE	Macrophage-capping protein (Actin regulatory protein CAP-G) (Actin-capping protein GCAP39) (Myc basic motif homolog 1)	Capg Mbh1	1	10	10	10	248.73	175	466200000	8.66857	8857800000	9.94733	741670000	817090000	742070000	614030000	411680000	334390000	558870000	555070000	419710000	1041300000	1232400000	1389600000	175	29414000	29214000	22090000	54803000	64862000	73134000	39035000	43005000	39056000	32318000	21668000	17600000	19710000	19336000	17496000	29034000	32621000	31804000	20688000	21054000	19340000	29760000	21073000
P09528	FRIH_MOUSE	Ferritin heavy chain (Ferritin H subunit) (EC 1.16.3.1) [Cleaved into: Ferritin heavy chain, N-terminally processed]	Fth1 Fth	1	13	13	13	125.28	176	465390000	8.66782	6980800000	9.84391	328740000	367360000	462020000	128400000	132420000	23363000	703470000	838360000	685450000	188040000	1487400000	1635800000	176	46898000	55891000	45697000	12536000	99160000	109050000	21916000	24491000	30801000	8559800	8828000	1557500	20810000	25976000	22685000	6591500	38509000	34267000	9512800	9370700	14778000	6383200	7212300
P97873	LOXL1_MOUSE	Lysyl oxidase homolog 1 (EC 1.4.3.-) (Lysyl oxidase 2) (Lysyl oxidase-like protein 1)	Loxl1 Lox2 Loxl	1	23	23	23	323.31	177	464590000	8.66707	16725000000	10.2234	2336400000	2101400000	1966900000	1520100000	1875800000	1343000000	281290000	292220000	279590000	1440700000	1289700000	1997900000	177	7813700	8117300	7766400	40019000	35826000	55499000	64900000	58373000	54637000	42224000	52106000	37305000	11960000	13069000	13723000	47853000	38515000	44136000	67522000	62408000	61865000	59803000	79762000
P62315	SMD1_MOUSE	Small nuclear ribonucleoprotein Sm D1 (Sm-D1) (Sm-D autoantigen) (snRNP core protein D1)	Snrpd1	1	5	5	5	61.057	178	463610000	8.66615	2781700000	9.44431	185160000	179310000	156540000	67896000	167300000	179660000	281310000	199110000	316390000	348990000	357960000	342060000	178	46886000	33185000	52732000	58164000	59660000	57010000	30860000	29885000	26090000	11316000	27883000	29943000	8603100	8207200	8331900	8241100	7785000	7707000	6101600	6496100	6419500	6568700	6653200
P45376	ALDR_MOUSE	Aldose reductase (AR) (EC 1.1.1.21) (Aldehyde reductase)	Akr1b1 Akr1b3 Aldor1 Aldr1	1	18	18	18	221.25	179	459730000	8.6625	11493000000	10.0604	989070000	760820000	884790000	735460000	786560000	627920000	795300000	795980000	646060000	1349400000	1291100000	1830900000	179	31812000	31839000	25842000	53976000	51643000	73235000	39563000	30433000	35391000	29418000	31462000	25117000	25558000	24846000	23387000	40955000	35814000	35361000	24923000	22804000	27075000	30637000	35236000
P07901	HS90A_MOUSE	Heat shock protein HSP 90-alpha (Heat shock 86 kDa) (HSP 86) (HSP86) (Tumor-specific transplantation 86 kDa antigen) (TSTA)	Hsp90aa1 Hsp86 Hsp86-1 Hspca	1	51	33	33	323.31	180	459650000	8.66243	22063000000	10.3437	1739900000	1714100000	1649900000	1487900000	1071300000	880690000	1873500000	1972900000	1714200000	2308000000	2522700000	3128100000	180	39032000	41103000	35713000	48083000	52556000	65169000	36249000	35711000	34374000	30998000	22319000	18348000	63156000	65168000	62094000	74398000	71497000	70520000	51482000	52760000	55227000	60021000	49738000
O35215	DOPD_MOUSE	D-dopachrome decarboxylase (EC 4.1.1.84) (D-dopachrome tautomerase)	Ddt	1	10	10	10	154.48	181	458910000	8.66173	4589100000	9.66173	364510000	344270000	378140000	185080000	285450000	157770000	265180000	249450000	251930000	476390000	853760000	776860000	181	26518000	24945000	25193000	47639000	85376000	77686000	36451000	34427000	37814000	18508000	28545000	15777000	7875200	7200600	7768300	16221000	19510000	19486000	11684000	10822000	13245000	9718700	15179000
P30412	PPIC_MOUSE	Peptidyl-prolyl cis-trans isomerase C (PPIase C) (EC 5.2.1.8) (Cyclophilin C) (Rotamase C)	Ppic Cypc	1	10	10	10	235.13	182	458540000	8.66138	7336700000	9.8655	685360000	764310000	751000000	142290000	481510000	157880000	610460000	671810000	636300000	375570000	721720000	1338500000	182	38154000	41988000	39769000	23473000	45107000	83657000	42835000	47769000	46937000	8893200	30094000	9867300	19069000	20776000	22813000	12261000	20901000	28158000	17665000	18903000	21544000	7407300	25335000
P63168	DYL1_MOUSE	Dynein light chain 1, cytoplasmic (8 kDa dynein light chain) (DLC8) (Dynein light chain LC8-type 1) (Protein inhibitor of neuronal nitric oxide synthase) (PIN) (mPIN)	Dynll1 Dlc1 Dncl1 Dnclc1	1	6	6	3	323.31	183	451640000	8.65479	2709800000	9.43294	295120000	313560000	295800000	162710000	107160000	97452000	210490000	169450000	187850000	198050000	265940000	406280000	183	35081000	28241000	31308000	33008000	44323000	67713000	49187000	52259000	49300000	27118000	17860000	16242000	6066200	5468600	5869100	10511000	7111100	7703300	7800300	7912700	7606500	7377900	6480600
Q05816	FABP5_MOUSE	Fatty acid-binding protein 5 (Epidermal-type fatty acid-binding protein) (E-FABP) (Fatty acid-binding protein, epidermal) (Keratinocyte lipid-binding protein) (Psoriasis-associated fatty acid-binding protein homolog) (PA-FABP)	Fabp5 Fabpe Klbp Mal1	1	9	9	9	323.31	184	448040000	8.65132	5376500000	9.7305	488430000	439710000	354830000	505120000	307600000	291590000	216250000	228180000	186080000	642600000	764780000	951310000	184	18021000	19015000	15506000	53550000	63731000	79276000	40702000	36642000	29569000	42094000	25634000	24299000	8909000	9045400	7737000	16064000	19249000	19092000	17076000	13501000	15160000	19175000	15695000
P21956	MFGM_MOUSE	Lactadherin (MFGM) (Milk fat globule-EGF factor 8) (MFG-E8) (SED1) (Sperm surface protein SP47) (MP47)	Mfge8	1	18	18	18	323.31	185	445980000	8.64932	12933000000	10.1117	952870000	757040000	801830000	912620000	1271100000	449040000	1467200000	1268000000	1495300000	1169700000	975050000	1413700000	185	50595000	43723000	51563000	40335000	33622000	48748000	32858000	26105000	27649000	31470000	43830000	15484000	40328000	41175000	50754000	35376000	27797000	36978000	30104000	28700000	33615000	36516000	55765000
P60867	RS20_MOUSE	40S ribosomal protein S20	Rps20	1	4	4	4	33.535	186	445330000	8.64868	2672000000	9.42684	215380000	194860000	239550000	118330000	61237000	57061000	394210000	414730000	308750000	207700000	198090000	262100000	186	65702000	69122000	51458000	34617000	33015000	43684000	35897000	32476000	39925000	19721000	10206000	9510200	12929000	13480000	10875000	6104200	5630800	5671400	6062800	5256400	6633000	6304900	3740700
P61957	SUMO2_MOUSE	Small ubiquitin-related modifier 2 (SUMO-2) (SMT3 homolog 2) (Ubiquitin-like protein SMT3B) (Smt3B)	Sumo2 Smt3b Smt3h2	1	3	3	2	46.409	187	444430000	8.6478	2666600000	9.42596	209780000	208840000	199320000	172920000	173560000	99600000	258350000	245280000	245930000	265540000	267040000	320450000	187	43058000	40880000	40988000	44257000	44506000	53408000	34963000	34807000	33221000	28820000	28927000	16600000	6960700	6486000	7643100	11624000	6114100	6545100	5870600	5645800	5365700	7831400	7915600
Q9R1P1	PSB3_MOUSE	Proteasome subunit beta type-3 (EC 3.4.25.1) (Proteasome chain 13) (Proteasome component C10-II) (Proteasome theta chain)	Psmb3	1	9	9	9	156.36	188	443080000	8.64648	3987700000	9.60072	279430000	344370000	271230000	269440000	229100000	172120000	370690000	354940000	361180000	362380000	449950000	520920000	188	41188000	39438000	40131000	40265000	49994000	57880000	31048000	38263000	30137000	29938000	25456000	19125000	9764800	9716300	11023000	11322000	14477000	11810000	8701900	9288400	9197200	15413000	10196000
P68040	RACK1_MOUSE	Receptor of activated protein C kinase 1 (12-3) (Guanine nucleotide-binding protein subunit beta-2-like 1) (Receptor for activated C kinase) (Receptor of activated protein kinase C 1) (p205) [Cleaved into: Receptor of activated protein C kinase 1, N-terminally processed (Guanine nucleotide-binding protein subunit beta-2-like 1, N-terminally processed)]	Rack1 Gnb2-rs1 Gnb2l1	1	15	15	15	198.81	189	442570000	8.64598	9736500000	9.9884	701580000	677020000	635710000	410260000	246390000	188420000	1691100000	1574800000	1446100000	769280000	671760000	711520000	189	76866000	71584000	65733000	34967000	30534000	32342000	31890000	30774000	28896000	18648000	11200000	8564700	45093000	38835000	45369000	26142000	18586000	19939000	19182000	19965000	22579000	19705000	13131000
P61089	UBE2N_MOUSE	Ubiquitin-conjugating enzyme E2 N (EC 2.3.2.23) (Bendless-like ubiquitin-conjugating enzyme) (E2 ubiquitin-conjugating enzyme N) (Ubc13) (Ubiquitin carrier protein N) (Ubiquitin-protein ligase N)	Ube2n Blu	2	10	10	10	35.287	190	441950000	8.64537	4861500000	9.68677	364850000	268520000	283620000	270420000	262400000	179500000	470630000	501160000	427510000	505950000	644570000	682340000	190	42785000	45560000	38864000	45996000	58598000	62031000	33168000	24411000	25784000	24583000	23854000	16318000	15095000	14261000	13206000	16110000	16925000	15139000	11123000	9548100	12386000	12267000	11632000
Q61937	NPM_MOUSE	Nucleophosmin (NPM) (Nucleolar phosphoprotein B23) (Nucleolar protein NO38) (Numatrin)	Npm1	1	9	9	9	268.04	191	441940000	8.64536	8396800000	9.92411	794730000	615150000	735570000	705990000	421370000	280390000	776360000	931500000	854630000	925920000	669780000	681250000	191	40861000	49027000	44980000	48733000	35251000	35855000	41828000	32376000	38714000	37157000	22177000	14758000	25445000	29457000	27609000	22807000	19668000	15905000	23290000	19803000	23053000	31373000	21516000
P26350	PTMA_MOUSE	Prothymosin alpha [Cleaved into: Prothymosin alpha, N-terminally processed; Thymosin alpha]	Ptma	1	6	6	6	57.869	192	439840000	8.64329	1759400000	9.24536	59151000	64759000	67988000	195610000	111950000	199650000	209070000	192050000	185930000	156880000	184480000	131130000	192	52268000	48012000	46483000	39219000	46119000	32783000	14788000	16190000	16997000	48903000	27986000	49913000	0	0	0	3876800	0	0	0	0	0	11165000	3932600
Q9Z2U0	PSA7_MOUSE	Proteasome subunit alpha type-7 (EC 3.4.25.1) (Proteasome subunit RC6-1)	Psma7	1	16	16	11	313.5	193	436660000	8.64014	9606500000	9.98257	936150000	956260000	931210000	575120000	431140000	410030000	769850000	828590000	672890000	745800000	945360000	1403600000	193	34993000	37663000	30586000	33900000	42971000	63798000	42552000	43466000	42328000	26142000	19597000	18638000	23564000	23896000	22848000	26011000	28170000	32366000	28980000	28500000	29785000	25394000	23838000
P63276	RS17_MOUSE	40S ribosomal protein S17	Rps17	1	7	7	7	204.34	194	435300000	8.63879	3482400000	9.54188	233870000	267720000	259520000	180290000	119630000	70103000	491770000	555700000	404040000	298100000	277580000	324110000	194	61471000	69462000	50506000	37262000	34697000	40514000	29233000	33465000	32440000	22536000	14954000	8762900	16581000	18323000	14274000	7394800	7836800	8069000	6935700	7303700	7564400	7177500	5256500
P62889	RL30_MOUSE	60S ribosomal protein L30	Rpl30	1	5	5	5	42.999	195	432830000	8.63632	3895400000	9.59055	279650000	277970000	267820000	162470000	95423000	61307000	665440000	666830000	587920000	243350000	228790000	358470000	195	73938000	74092000	65325000	27039000	25421000	39830000	31072000	30885000	29758000	18052000	10603000	6811900	20266000	21186000	19346000	8594200	6806200	8033800	7269500	7132600	7599800	7400200	4664300
Q64433	CH10_MOUSE	10 kDa heat shock protein, mitochondrial (Hsp10) (10 kDa chaperonin) (Chaperonin 10) (CPN10)	Hspe1	1	7	7	7	19.659	196	430910000	8.63439	4740000000	9.67578	282030000	269680000	510200000	449240000	683210000	230820000	428030000	337350000	418290000	305060000	373460000	452630000	196	38912000	30668000	38026000	27733000	33951000	41148000	25639000	24516000	46382000	40840000	62110000	20983000	15358000	13338000	15842000	11476000	12076000	12038000	10018000	8677800	8670200	21146000	25792000
P09405	NUCL_MOUSE	Nucleolin (Protein C23)	Ncl Nuc	1	29	29	29	323.31	197	429880000	8.63335	24074000000	10.3815	2030900000	1746500000	1783700000	1409000000	1165900000	703570000	2838200000	2702000000	3155100000	1960100000	2147900000	2402400000	197	50682000	48249000	56341000	35002000	38354000	42900000	36266000	31187000	31852000	25161000	20820000	12564000	92774000	84260000	107570000	60380000	60041000	56533000	57008000	55157000	61657000	59200000	56309000
P51859	HDGF_MOUSE	Hepatoma-derived growth factor (HDGF)	Hdgf Tdrm1	2	13	13	11	101.51	198	425100000	8.62849	7651800000	9.88376	763670000	611520000	671120000	467880000	462990000	297340000	568090000	573470000	514150000	681770000	844290000	1195600000	198	31560000	31859000	28564000	37876000	46905000	66420000	42426000	33973000	37284000	25994000	25721000	16519000	18694000	18418000	18441000	22346000	24356000	25679000	22234000	18284000	19799000	23084000	21330000
P57776	EF1D_MOUSE	Elongation factor 1-delta (EF-1-delta)	Eef1d	1	12	12	11	312.27	199	424180000	8.62755	10180000000	10.0077	914020000	733970000	827460000	594680000	477430000	340970000	965470000	802640000	820470000	1061100000	1204300000	1437800000	199	40228000	33443000	34186000	44211000	50180000	59907000	38084000	30582000	34477000	24778000	19893000	14207000	32290000	27216000	30641000	30043000	33518000	28300000	25570000	17576000	23337000	24617000	23466000
P62264	RS14_MOUSE	40S ribosomal protein S14	Rps14	1	11	11	11	49.657	200	422610000	8.62594	2958300000	9.47104	200460000	155250000	175490000	155860000	95369000	59431000	501720000	492660000	354400000	273910000	251760000	241970000	200	71675000	70380000	50629000	39130000	35966000	34567000	28637000	22179000	25071000	22265000	13624000	8490100	14033000	14346000	10360000	7435300	7099300	6763000	9222100	5804900	7588100	6525200	4596100
Q61598	GDIB_MOUSE	Rab GDP dissociation inhibitor beta (Rab GDI beta) (GDI-3) (Guanosine diphosphate dissociation inhibitor 2) (GDI-2)	Gdi2 Gdi3	1	35	35	28	323.31	201	421250000	8.62454	13059000000	10.1159	980100000	920990000	849740000	648530000	488540000	437640000	1365600000	1316300000	1088000000	1348400000	1609000000	2005900000	201	44051000	42460000	35097000	43497000	51904000	64705000	31616000	29709000	27411000	20920000	15759000	14117000	41444000	39494000	37082000	40756000	41718000	41478000	29522000	30935000	30295000	27814000	26252000
P08249	MDHM_MOUSE	Malate dehydrogenase, mitochondrial (EC 1.1.1.37)	Mdh2 Mor1	1	16	16	16	152.56	202	420800000	8.62408	10520000000	10.022	561450000	613890000	582820000	1384600000	1122700000	682930000	959590000	890190000	985220000	769650000	936360000	1024100000	202	38384000	35608000	39409000	30786000	37454000	40965000	22458000	24555000	23313000	55384000	44907000	27317000	29374000	28511000	36367000	26097000	26849000	26154000	19332000	20541000	19649000	56171000	52772000
Q62426	CYTB_MOUSE	Cystatin-B (Stefin-B)	Cstb Cst6 Stfb	1	5	5	5	55.765	203	416270000	8.61938	4162700000	9.61938	303360000	263880000	272340000	248940000	245820000	182010000	264630000	230440000	212210000	608270000	620730000	710090000	203	26463000	23044000	21221000	60827000	62073000	71009000	30336000	26388000	27234000	24894000	24582000	18201000	8628200	7792900	7254400	21403000	17094000	14899000	8552900	8365700	8576400	11690000	11641000
P47962	RL5_MOUSE	60S ribosomal protein L5	Rpl5	1	15	15	15	109.05	204	415080000	8.61813	8716600000	9.94035	879490000	831420000	780870000	400030000	374840000	274660000	1023800000	1001500000	1000800000	625580000	690340000	833180000	204	48752000	47693000	47657000	29790000	32874000	39675000	41881000	39592000	37184000	19049000	17850000	13079000	33931000	33704000	36155000	16609000	20273000	19197000	26280000	24682000	24110000	15734000	16081000
P48678	LMNA_MOUSE	Prelamin-A/C [Cleaved into: Lamin-A/C]	Lmna Lmn1	1	46	46	45	323.31	205	413400000	8.61637	22324000000	10.3488	1721700000	1555200000	1416100000	2407200000	1810000000	1395700000	2262600000	2309100000	2424500000	1424800000	1744000000	1850400000	205	41900000	42761000	44899000	26385000	32297000	34266000	31884000	28799000	26224000	44578000	33519000	25846000	66325000	68405000	73884000	45268000	43354000	41738000	50338000	47882000	50242000	129470000	74598000
P84078	ARF1_MOUSE	ADP-ribosylation factor 1	Arf1	3	9	9	4	85.89	206	410750000	8.61358	5750500000	9.75971	559680000	653540000	519250000	332630000	198560000	271950000	464790000	508040000	449170000	422590000	655780000	714540000	206	33199000	36288000	32083000	30185000	46841000	51039000	39977000	46681000	37089000	23759000	14183000	19425000	15557000	15737000	15298000	13597000	17611000	17273000	14219000	17306000	14791000	14599000	14504000
Q9CQR2	RS21_MOUSE	40S ribosomal protein S21	Rps21	1	5	5	5	23.614	207	410410000	8.61322	3283300000	9.51631	260440000	280510000	243330000	142000000	66901000	36591000	596360000	546440000	365420000	234530000	232290000	276290000	207	74544000	68306000	45677000	29317000	29036000	34536000	32555000	35064000	30416000	17750000	8362600	4573900	17509000	15572000	15016000	5264400	6971700	6127500	7377400	7197700	6743400	6867100	4956100
P35979	RL12_MOUSE	60S ribosomal protein L12	Rpl12	1	7	7	7	323.31	208	410230000	8.61303	4922700000	9.6922	371530000	349300000	363310000	361130000	170180000	94569000	804170000	753640000	672260000	313060000	274860000	393340000	208	67014000	62803000	56022000	26088000	22905000	32778000	30961000	29108000	30276000	30094000	14182000	7880800	24830000	24418000	22875000	9966900	8275000	9347300	10830000	10271000	11057000	16215000	8344600
P63001	RAC1_MOUSE	Ras-related C3 botulinum toxin substrate 1 (p21-Rac1)	Rac1	3	12	12	11	41.135	209	401980000	8.6042	4823700000	9.68338	550970000	459040000	506800000	253510000	182510000	115280000	360460000	397390000	304350000	410390000	549600000	733430000	209	30038000	33116000	25363000	34200000	45800000	61119000	45914000	38253000	42233000	21125000	15209000	9606300	11432000	12498000	10770000	13494000	15886000	16649000	14688000	12708000	15660000	10409000	9078200
Q68FD5	CLH1_MOUSE	Clathrin heavy chain 1	Cltc	1	85	85	85	323.31	210	401580000	8.60377	45379000000	10.6569	4309700000	4324700000	3775300000	2789800000	2667000000	2206800000	3226600000	3218500000	2971300000	4150800000	5457400000	6280800000	210	28554000	28482000	26294000	36733000	48295000	55582000	38139000	38272000	33410000	24689000	23601000	19530000	99218000	103580000	103480000	129430000	140860000	137620000	121230000	130720000	124000000	122210000	125060000
Q9D0F9	PGM1_MOUSE	Phosphoglucomutase-1 (PGM 1) (EC 5.4.2.2) (Glucose phosphomutase 1) (Phosphoglucomutase-2)	Pgm1 Pgm2	1	33	33	33	232.21	211	401060000	8.60321	17246000000	10.2367	1790000000	1563300000	1653400000	2022100000	1393300000	1246700000	102720000	182490000	86278000	1982500000	2651200000	2562100000	211	2388700	4244100	2006500	46104000	61655000	59583000	41627000	36357000	38451000	47026000	32403000	28993000	3851600	5859100	4845200	66592000	76530000	55993000	39698000	36990000	30374000	88346000	71827000
P97297	ADML_MOUSE	ADM [Cleaved into: Adrenomedullin (AM); Proadrenomedullin N-20 terminal peptide (ProAM N-terminal 20 peptide) (PAMP) (ProAM-N20)]	Adm	1	4	4	4	51.202	212	399470000	8.60148	3994700000	9.60148	1142000000	1084300000	795020000	93903000	170010000	70598000	22447000	30031000	20625000	133220000	148270000	284270000	212	2244700	3003100	2062500	13322000	14827000	28427000	114200000	108430000	79502000	9390300	17001000	7059800	1597400	1259300	1583600	3363200	4876200	7277600	34632000	24731000	19793000	5152500	9365800
P62855	RS26_MOUSE	40S ribosomal protein S26	Rps26	1	4	4	4	59.222	213	397510000	8.59935	2782600000	9.44445	232400000	246700000	247350000	91691000	62064000	42281000	402260000	486310000	323610000	170110000	191020000	286790000	213	57466000	69473000	46231000	24301000	27288000	40970000	33200000	35243000	35336000	13099000	8866300	6040100	13124000	14322000	11296000	5681300	5466100	6181500	5696800	6168700	6516000	4951200	3651200
P63323	RS12_MOUSE	40S ribosomal protein S12	Rps12	1	5	5	5	74.551	214	394500000	8.59605	3550500000	9.55029	299200000	302570000	270940000	164490000	120010000	75284000	560670000	538130000	463700000	251360000	248260000	255910000	214	62296000	59793000	51523000	27929000	27585000	28435000	33245000	33618000	30104000	18276000	13335000	8364900	18217000	16717000	15973000	7604900	6719100	6450400	8393700	8055400	9107800	7572600	5947100
P61982	1433G_MOUSE	14-3-3 protein gamma [Cleaved into: 14-3-3 protein gamma, N-terminally processed]	Ywhag	1	14	9	9	81.362	215	381720000	8.58174	8016100000	9.90396	688850000	701210000	661350000	732510000	685830000	448850000	444970000	456750000	291030000	924720000	843060000	1134900000	215	21189000	21750000	13858000	44034000	40146000	54044000	32802000	33391000	31493000	34881000	32658000	21374000	14468000	15646000	13054000	32748000	23732000	25881000	19321000	18130000	19400000	30860000	33714000
P12970	RL7A_MOUSE	60S ribosomal protein L7a (Surfeit locus protein 3)	Rpl7a Surf-3 Surf3	1	20	20	20	205.46	216	380470000	8.58032	7229000000	9.85908	394480000	401260000	435290000	302050000	166250000	111330000	1359100000	1377600000	1336600000	478070000	418740000	448140000	216	71534000	72505000	70346000	25162000	22039000	23587000	20762000	21119000	22910000	15897000	8749900	5859200	41510000	40432000	40800000	15385000	12829000	13226000	14600000	15631000	17383000	12363000	7910000
Q99K85	SERC_MOUSE	Phosphoserine aminotransferase (PSAT) (EC 2.6.1.52) (Endometrial progesterone-induced protein) (EPIP) (Phosphohydroxythreonine aminotransferase)	Psat1 Psa Psat	1	18	18	18	218.8	217	373650000	8.57246	11583000000	10.0638	751480000	667060000	879090000	538890000	491030000	333380000	1453700000	1452000000	1129600000	1001700000	1229800000	1655400000	217	46895000	46838000	36438000	32312000	39671000	53399000	24241000	21518000	28358000	17384000	15840000	10754000	46571000	44912000	41425000	33661000	35982000	36232000	21428000	20593000	23766000	24243000	24791000
P68510	1433F_MOUSE	14-3-3 protein eta	Ywhah	1	17	15	14	126.31	218	372850000	8.57153	7457000000	9.87256	358930000	381380000	310540000	623200000	621520000	443490000	762300000	681820000	627760000	819070000	1190500000	636560000	218	38115000	34091000	31388000	40954000	59523000	31828000	17946000	19069000	15527000	31160000	31076000	22175000	20621000	20085000	18872000	28008000	27536000	22887000	16084000	16414000	19198000	24772000	26287000
Q99JR5	TINAL_MOUSE	Tubulointerstitial nephritis antigen-like (Adrenocortical zonation factor 1) (AZ-1) (Androgen-regulated gene 1 protein) (Tubulointerstitial nephritis antigen-related protein) (TARP)	Tinagl1 Arg1 Lcn7 Tinagl	1	17	17	17	323.31	219	372070000	8.57062	10046000000	10.002	1135900000	1268200000	946300000	830210000	794170000	553090000	594510000	507510000	571040000	518400000	959680000	1354000000	219	22019000	18797000	21150000	19200000	35544000	50147000	42071000	46971000	35048000	30748000	29414000	20485000	19264000	18352000	21061000	17651000	22327000	29000000	38999000	31989000	27357000	37318000	38221000
P07356	ANXA2_MOUSE	Annexin A2 (Annexin II) (Annexin-2) (Calpactin I heavy chain) (Calpactin-1 heavy chain) (Chromobindin-8) (Lipocortin II) (Placental anticoagulant protein IV) (PAP-IV) (Protein I) (p36)	Anxa2 Anx2 Cal1h	1	25	25	25	323.31	220	371210000	8.56962	10765000000	10.032	1356600000	1310400000	1087100000	1079300000	353480000	532130000	462850000	675840000	622630000	793830000	1067700000	1331300000	220	15960000	23305000	21470000	27374000	36818000	45907000	46778000	45188000	37488000	37216000	12189000	18349000	15940000	19064000	22751000	23416000	27334000	27895000	35421000	37555000	37122000	39499000	18430000
P12850	GROA_MOUSE	Growth-regulated alpha protein (C-X-C motif chemokine 1) (Platelet-derived growth factor-inducible protein KC) (Secretory protein N51) [Cleaved into: KC(5-72) (Hematopoietic synergistic factor) (HSF) (KC-T)]	Cxcl1 Gro Gro1 Mgsa Scyb1	1	3	3	3	45.698	221	369950000	8.56814	2589700000	9.41325	385570000	165440000	310250000	93256000	563830000	103600000	77423000	89508000	86243000	269260000	225670000	219600000	221	11060000	12787000	12320000	38466000	32239000	31371000	55081000	23634000	44322000	13322000	80548000	14800000	2587200	3064100	2993800	7918800	6429900	8541700	9968200	7637500	8829900	5020600	22284000
O88200	CLC11_MOUSE	C-type lectin domain family 11 member A (Lymphocyte secreted C-type lectin) (Osteolectin) (Stem cell growth factor)	Clec11a Scgf	1	11	11	11	174.13	222	367390000	8.56513	7347700000	9.86615	692670000	477620000	392580000	288490000	704310000	179430000	526440000	658490000	584700000	709640000	704320000	1429100000	222	26322000	32924000	29235000	35482000	35216000	71453000	34634000	23881000	19629000	14425000	35216000	8971600	18373000	22368000	21192000	21759000	20077000	28468000	15093000	15576000	13829000	14893000	36584000
Q6ZWN5	RS9_MOUSE	40S ribosomal protein S9	Rps9	1	14	14	14	32.938	223	365800000	8.56324	6950300000	9.842	416240000	416310000	443610000	256370000	141890000	122880000	1291400000	1271400000	1161000000	543440000	392140000	493630000	223	67966000	66915000	61107000	28602000	20639000	25980000	21907000	21911000	23348000	13493000	7467900	6467200	36985000	38592000	35311000	16026000	13918000	13946000	14252000	14035000	16898000	12529000	8432200
Q6P069	SORCN_MOUSE	Sorcin	Sri	1	10	10	10	74.221	224	364580000	8.56179	4739600000	9.67574	354420000	334190000	314890000	391930000	365170000	244290000	310990000	362700000	277900000	545930000	547280000	689320000	224	23923000	27900000	21377000	41994000	42099000	53024000	27263000	25707000	24222000	30148000	28090000	18791000	10187000	11358000	9694400	15036000	15089000	15628000	10979000	11954000	12054000	14533000	13496000
P56565	S10A1_MOUSE	Protein S100-A1 (S-100 protein alpha chain) (S-100 protein subunit alpha) (S100 calcium-binding protein A1)	S100a1	1	4	4	4	46.236	225	364010000	8.56111	1820000000	9.26007	80566000	119110000	95375000	117120000	117410000	105590000	159840000	168820000	151810000	190420000	261450000	252520000	225	31967000	33765000	30363000	38083000	52290000	50504000	16113000	23823000	19075000	23424000	23482000	21119000	4725700	5034400	4604400	6934800	6292600	3390800	1793100	2497500	2413600	5046500	5472600
Q8R015	BL1S5_MOUSE	Biogenesis of lysosome-related organelles complex 1 subunit 5 (BLOC-1 subunit 5) (Protein Muted homolog)	Bloc1s5 Mu Muted	1	2	2	2	2.5832	226	363630000	8.56066	4727200000	9.6746	533170000	671740000	692300000	511360000	424680000	285580000	208590000	193590000	220830000	144730000	327840000	512820000	226	16046000	14891000	16987000	11133000	25219000	39448000	41013000	51672000	53253000	39335000	32668000	21968000	0	0	7250400	0	0	0	0	17912000	21013000	0	0
Q6GU68	ISLR_MOUSE	Immunoglobulin superfamily containing leucine-rich repeat protein	Islr	1	13	13	13	245.24	227	361440000	8.55804	7228800000	9.85907	1052900000	1049400000	917230000	385960000	550980000	267860000	227680000	235720000	276720000	552570000	656190000	1004100000	227	11384000	11786000	13836000	27628000	32809000	50204000	52644000	52470000	45861000	19298000	27549000	13393000	8117500	8775900	10189000	18535000	18894000	22307000	28138000	28690000	27375000	17806000	26772000
P48024	EIF1_MOUSE	Eukaryotic translation initiation factor 1 (eIF1) (Protein translation factor SUI1 homolog)	Eif1 Sui1 Sui1-rs1	2	11	11	11	175.76	228	360400000	8.55678	2162400000	9.33494	116980000	149170000	180480000	23146000	107140000	23536000	297550000	313980000	213410000	210200000	217310000	309480000	228	49591000	52329000	35569000	35033000	36219000	51581000	19496000	24862000	30080000	3857600	17857000	3922700	8113800	9641300	7592400	6912800	6252200	6298900	3401400	4786800	5074200	2223300	5597000
Q9CXI5	MANF_MOUSE	Mesencephalic astrocyte-derived neurotrophic factor (Arginine-rich protein) (Protein ARMET)	Manf Armet	1	12	12	12	68.974	229	358840000	8.5549	5382600000	9.73099	397880000	375350000	291270000	793460000	649980000	370400000	382120000	381430000	378440000	412940000	376650000	572640000	229	25475000	25429000	25229000	27530000	25110000	38176000	26525000	25023000	19418000	52897000	43332000	24693000	12853000	12974000	14647000	14740000	12141000	14281000	12931000	12095000	12243000	30420000	28177000
Q3THE2	ML12B_MOUSE	Myosin regulatory light chain 12B (Myosin regulatory light chain 2-B, smooth muscle isoform) (Myosin regulatory light chain 20 kDa) (MLC20) (Myosin regulatory light chain MRLC2)	Myl12b Mrlc2 Mylc2b	2	9	9	9	201.92	230	358700000	8.55473	3945700000	9.59612	319010000	324320000	374540000	201810000	161890000	115450000	424370000	450160000	343300000	278180000	421280000	531340000	230	38579000	40924000	31210000	25289000	38298000	48304000	29001000	29484000	34049000	18347000	14717000	10496000	12402000	14291000	12405000	9117700	11756000	12095000	9318700	9689500	11142000	8846700	7320600
Q9QUM9	PSA6_MOUSE	Proteasome subunit alpha type-6 (EC 3.4.25.1) (Macropain iota chain) (Multicatalytic endopeptidase complex iota chain) (Proteasome iota chain)	Psma6	1	13	13	13	142.3	231	354090000	8.54911	6373600000	9.80438	521880000	473520000	502290000	511850000	414740000	320440000	384020000	380540000	403320000	784210000	762600000	904430000	231	21334000	21141000	22407000	43567000	42366000	50246000	28993000	26307000	27905000	28436000	23041000	17802000	14576000	14015000	14204000	28562000	17510000	18876000	14960000	13821000	14625000	24677000	21740000
P62960	YBOX1_MOUSE	Nuclease-sensitive element-binding protein 1 (CCAAT-binding transcription factor I subunit A) (CBF-A) (DNA-binding protein B) (DBPB) (Enhancer factor I subunit A) (EFI-A) (Y-box transcription factor) (Y-box-binding protein 1) (YB-1)	Ybx1 Msy-1 Msy1 Nsep1 Yb1	1	13	13	8	323.31	232	350580000	8.54479	7362300000	9.86701	621090000	641500000	612090000	296410000	282030000	151930000	1063100000	1041800000	1107100000	506620000	461640000	576920000	232	50623000	49610000	52720000	24125000	21983000	27473000	29576000	30548000	29147000	14115000	13430000	7234600	29879000	34360000	35493000	15344000	12558000	13715000	17338000	18749000	18776000	13537000	13283000
P22777	PAI1_MOUSE	Plasminogen activator inhibitor 1 (PAI) (PAI-1) (Endothelial plasminogen activator inhibitor) (Serpin E1)	Serpine1 Mr1 Pai1 Planh1	1	22	22	22	194.59	233	348820000	8.5426	10116000000	10.005	2066000000	1827000000	1482400000	1387300000	337600000	332120000	290840000	287000000	206800000	392560000	551900000	954140000	233	10029000	9896700	7131000	13537000	19031000	32901000	71242000	63002000	51119000	47839000	11641000	11452000	10015000	9935500	8665900	9615200	15886000	18569000	49478000	52431000	46916000	63579000	18140000
O08553	DPYL2_MOUSE	Dihydropyrimidinase-related protein 2 (DRP-2) (Unc-33-like phosphoprotein 2) (ULIP-2)	Dpysl2 Crmp2 Ulip2	3	26	26	26	323.31	234	347380000	8.5408	13201000000	10.1206	1099300000	1120100000	1051100000	965950000	716350000	613190000	1023100000	912140000	859410000	1445800000	1481800000	1912200000	234	26923000	24004000	22616000	38046000	38996000	50322000	28930000	29477000	27661000	25420000	18851000	16137000	33012000	31059000	31367000	40447000	42129000	42006000	31321000	30505000	30350000	40564000	34836000
Q9Z2U1	PSA5_MOUSE	Proteasome subunit alpha type-5 (EC 3.4.25.1) (Macropain zeta chain) (Multicatalytic endopeptidase complex zeta chain) (Proteasome zeta chain)	Psma5	1	13	13	13	245.12	235	346930000	8.54024	5550800000	9.74436	419010000	385150000	420610000	374440000	301470000	240050000	486120000	492240000	454080000	524580000	667690000	785400000	235	30382000	30765000	28380000	32786000	41730000	49088000	26188000	24072000	26288000	23403000	18842000	15003000	15663000	15390000	15185000	16319000	17817000	16475000	12913000	11983000	15818000	16307000	14899000
P39061	COIA1_MOUSE	Collagen alpha-1(XVIII) chain [Cleaved into: Endostatin; Non-collagenous domain 1 (NC1)]	Col18a1	1	28	28	28	323.31	236	343510000	8.53594	30229000000	10.4804	3221500000	3403000000	2798400000	3393600000	1475800000	1176100000	2542000000	2447400000	2353100000	2169400000	2321300000	2918000000	236	28887000	27812000	26739000	24653000	26379000	33159000	36607000	38670000	31799000	38563000	16771000	13365000	69079000	74397000	75218000	65257000	65359000	73058000	100300000	98612000	97592000	150780000	74996000
Q9D8N0	EF1G_MOUSE	Elongation factor 1-gamma (EF-1-gamma) (eEF-1B gamma)	Eef1g	1	19	19	19	200.88	237	342740000	8.53496	9596800000	9.98213	697520000	644880000	675580000	457790000	352100000	311610000	1207500000	1099300000	966480000	998500000	1037600000	1146800000	237	43127000	39259000	34517000	35661000	37059000	40957000	24911000	23031000	24128000	16350000	12575000	11129000	39218000	33725000	34380000	33764000	29649000	23624000	19902000	19183000	24090000	20188000	18102000
P62082	RS7_MOUSE	40S ribosomal protein S7	Rps7	1	9	9	9	50.036	238	339910000	8.53136	4418800000	9.6453	264800000	306370000	255780000	207160000	105570000	80104000	776840000	763940000	553590000	242570000	395400000	466720000	238	59757000	58765000	42584000	18660000	30415000	35902000	20369000	23567000	19675000	15935000	8120600	6161900	18784000	20578000	15807000	7174700	9170500	8057800	7437500	8454900	7116800	7656900	4820100
P62702	RS4X_MOUSE	40S ribosomal protein S4, X isoform	Rps4x Rps4	1	18	18	18	170.14	239	339380000	8.53069	8145100000	9.9109	628540000	514250000	596320000	298110000	218150000	147630000	1404200000	1461800000	1137200000	504600000	570760000	663460000	239	58509000	60909000	47385000	21025000	23782000	27644000	26189000	21427000	24847000	12421000	9089700	6151100	40551000	43453000	35877000	18203000	17945000	18597000	18105000	16465000	21213000	14845000	9973400
P62281	RS11_MOUSE	40S ribosomal protein S11	Rps11	1	12	12	12	39.412	240	337610000	8.52842	4388900000	9.64236	245250000	325700000	340230000	200930000	129780000	94111000	743080000	649340000	665410000	331560000	325240000	338290000	240	57160000	49950000	51185000	25504000	25019000	26022000	18866000	25054000	26172000	15456000	9983400	7239300	22552000	21490000	18925000	11060000	8788500	9680500	9515100	10818000	12000000	8167700	5891300
P35980	RL18_MOUSE	60S ribosomal protein L18	Rpl18	1	8	8	8	54.937	241	337320000	8.52804	3710500000	9.56943	237050000	213440000	247940000	149770000	101180000	54027000	684120000	660040000	607200000	236500000	242030000	277250000	241	62193000	60004000	55200000	21500000	22002000	25204000	21550000	19404000	22540000	13616000	9198000	4911600	21668000	20005000	19325000	8330400	6426800	6752200	7206300	6988200	8831600	6834400	4925500
O35206	COFA1_MOUSE	Collagen alpha-1(XV) chain [Cleaved into: Restin (Endostatin-XV)]	Col15a1	1	25	25	25	317.63	242	335870000	8.52617	17465000000	10.2422	2504700000	2673700000	2280700000	2080300000	1099800000	885110000	422830000	431310000	494850000	1060900000	1452300000	2078500000	242	8131300	8294400	9516300	20401000	27929000	39972000	48166000	51416000	43860000	40006000	21151000	17021000	14559000	14520000	17839000	37683000	42065000	45518000	66638000	69894000	65758000	92863000	53170000
Q99L47	F10A1_MOUSE	Hsc70-interacting protein (Hip) (Protein FAM10A1) (Protein ST13 homolog)	St13 Fam10a1 Hip	1	10	10	10	107.66	243	333120000	8.5226	6995600000	9.84482	708760000	689170000	663080000	340810000	346970000	253630000	558950000	576870000	517900000	546410000	811040000	981950000	243	26617000	27470000	24662000	26020000	38621000	46760000	33751000	32818000	31575000	16229000	16523000	12078000	15400000	16275000	16511000	15413000	23208000	22465000	17023000	15712000	18058000	15973000	17891000
P14148	RL7_MOUSE	60S ribosomal protein L7	Rpl7	1	24	24	24	104.98	244	330530000	8.51921	6610600000	9.82024	507810000	365610000	429500000	240330000	160610000	102100000	1244600000	1253500000	1122700000	375660000	376210000	431930000	244	62229000	62675000	56137000	18783000	18810000	21597000	25390000	18280000	21475000	12017000	8030300	5104800	34736000	34469000	33353000	14066000	11932000	12510000	14471000	13940000	15418000	11113000	8926300
P62897	CYC_MOUSE	Cytochrome c, somatic	Cycs	2	6	6	6	178.08	245	329330000	8.51763	2964000000	9.47188	205140000	206610000	117110000	181440000	237120000	179470000	234140000	239370000	221280000	288950000	318430000	534850000	245	26016000	26596000	24587000	32105000	35381000	59428000	22793000	22957000	13012000	20160000	26347000	19942000	7143800	8564000	6977500	9474100	8962900	12876000	9284200	5503200	4229300	7877100	9684700
Q9D1A2	CNDP2_MOUSE	Cytosolic non-specific dipeptidase (EC 3.4.13.18) (CNDP dipeptidase 2) (Glutamate carboxypeptidase-like protein 1)	Cndp2 Cn2	1	27	27	27	286.26	246	328720000	8.51683	9533000000	9.97923	650040000	655720000	821720000	657710000	514360000	358810000	538440000	639850000	534600000	984000000	1531700000	1646000000	246	18567000	22064000	18435000	33931000	52818000	56760000	22415000	22611000	28335000	22680000	17737000	12373000	19000000	20746000	17999000	26594000	36608000	35945000	22787000	21925000	25183000	29662000	27633000
P62852	RS25_MOUSE	40S ribosomal protein S25	Rps25	1	4	4	4	25.646	247	328610000	8.51668	2957500000	9.47092	176560000	222320000	259400000	92960000	79672000	57689000	449090000	475810000	397450000	227270000	239510000	279760000	247	49899000	52867000	44161000	25252000	26612000	31084000	19618000	24702000	28822000	10329000	8852500	6409900	13592000	14781000	13737000	7303600	6416700	5505300	5272500	5965400	6712700	5582500	4997500
P62270	RS18_MOUSE	40S ribosomal protein S18 (Ke-3) (Ke3)	Rps18	1	12	12	12	62.281	248	327860000	8.51569	4590000000	9.66181	227240000	218320000	243850000	219940000	140900000	100690000	803720000	826010000	764800000	441870000	273000000	329200000	248	57408000	59001000	54628000	31562000	19500000	23514000	16232000	15594000	17418000	15710000	10064000	7191800	18731000	19374000	20291000	9985200	9230300	7553400	7571300	6879300	8050400	8870600	5827300
P14869	RLA0_MOUSE	60S acidic ribosomal protein P0 (60S ribosomal protein L10E)	Rplp0 Arbp	1	14	14	14	210.16	249	325450000	8.51248	6183500000	9.79123	332720000	338950000	323590000	369360000	199560000	128290000	1091400000	1150800000	1102300000	315100000	476290000	354940000	249	57442000	60568000	58017000	16584000	25068000	18681000	17512000	17839000	17031000	19440000	10503000	6752300	32595000	33713000	33550000	11757000	12153000	10492000	11810000	11466000	13645000	17653000	9631600
Q9EQU5	SET_MOUSE	Protein SET (Phosphatase 2A inhibitor I2PP2A) (I-2PP2A) (Template-activating factor I) (TAF-I)	Set	1	13	13	13	195.55	250	322510000	8.50854	4192700000	9.62249	217850000	199300000	178450000	119300000	47776000	31138000	1020300000	970280000	830910000	173600000	163520000	240250000	250	78484000	74637000	63916000	13354000	12578000	18481000	16757000	15331000	13727000	9177300	3675100	2395200	27758000	30373000	25874000	8149100	6194300	6472200	6694400	6297000	6522900	6818700	3319900
P23198	CBX3_MOUSE	Chromobox protein homolog 3 (Heterochromatin protein 1 homolog gamma) (HP1 gamma) (M32) (Modifier 2 protein)	Cbx3	1	6	5	4	105.61	251	320260000	8.5055	4483700000	9.65164	425290000	415480000	363740000	269880000	216190000	147200000	430940000	424530000	458350000	365080000	415140000	551860000	251	30781000	30323000	32739000	26077000	29653000	39419000	30378000	29677000	25981000	19277000	15442000	10514000	15153000	13374000	15206000	12586000	11085000	12019000	11746000	11667000	10941000	12510000	11814000
O89086	RBM3_MOUSE	RNA-binding protein 3 (RNA-binding motif protein 3)	Rbm3	1	6	6	6	42.991	252	318150000	8.50263	3181500000	9.50263	248180000	283910000	245410000	78540000	135720000	88393000	370370000	397410000	387400000	293370000	312820000	339970000	252	37037000	39741000	38740000	29337000	31282000	33997000	24818000	28391000	24541000	7854000	13572000	8839300	12275000	13049000	12394000	6748600	8179900	7894600	8042800	7206000	8573600	3383800	6583100
P09602	HMGN2_MOUSE	Non-histone chromosomal protein HMG-17 (High mobility group nucleosome-binding domain-containing protein 2)	Hmgn2 Hmg-17 Hmg17	1	3	3	3	10.498	253	314930000	8.49821	2204500000	9.34331	291470000	234550000	245590000	131700000	86757000	55071000	163730000	177550000	172400000	167860000	204620000	272290000	253	23391000	25365000	24629000	23981000	29232000	38898000	41638000	33507000	35084000	18814000	12394000	7867300	5586500	5104700	6429900	4814100	6196400	8187300	8581400	7061700	7658900	5017100	3798500
Q9Z1Q5	CLIC1_MOUSE	Chloride intracellular channel protein 1 (Nuclear chloride ion channel 27) (NCC27)	Clic1	1	14	14	14	323.31	254	314100000	8.49707	5339800000	9.72752	338080000	322700000	316070000	294430000	236230000	198920000	583440000	547730000	461150000	583330000	660000000	797700000	254	34320000	32219000	27127000	34314000	38823000	46923000	19887000	18983000	18592000	17320000	13896000	11701000	18831000	17689000	15811000	21666000	19615000	17100000	10206000	9139500	10657000	12746000	11562000
P68037	UB2L3_MOUSE	Ubiquitin-conjugating enzyme E2 L3 (EC 2.3.2.23) (E2 ubiquitin-conjugating enzyme L3) (UbcM4) (Ubiquitin carrier protein L3) (Ubiquitin-protein ligase L3)	Ube2l3 Ubce7	1	8	8	8	61.111	255	311110000	8.49291	2800000000	9.44716	207450000	271760000	209980000	153740000	115730000	91953000	225700000	270300000	197360000	276760000	325300000	454010000	255	25078000	30033000	21929000	30751000	36144000	50445000	23051000	30195000	23331000	17082000	12859000	10217000	8009000	8030100	7603600	8373700	9139000	10335000	6252000	7313000	6442900	6679400	6309700
Q9R1P0	PSA4_MOUSE	Proteasome subunit alpha type-4 (EC 3.4.25.1) (Macropain subunit C9) (Multicatalytic endopeptidase complex subunit C9) (Proteasome component C9) (Proteasome subunit L)	Psma4	1	11	11	11	233.23	256	306020000	8.48575	4896300000	9.68987	406040000	508630000	429130000	331550000	287670000	232070000	354760000	376410000	321040000	424210000	460990000	762720000	256	22173000	23525000	20065000	26513000	28812000	47670000	25377000	31790000	26821000	20722000	17979000	14505000	13613000	12227000	12455000	14827000	14677000	15877000	12246000	12514000	12232000	13980000	13328000
P58771	TPM1_MOUSE	Tropomyosin alpha-1 chain (Alpha-tropomyosin) (Tropomyosin-1)	Tpm1 Tpm-1 Tpma	1	30	30	16	190.18	257	304890000	8.48414	9146600000	9.96126	656210000	578300000	622030000	820660000	552360000	501280000	613810000	602550000	647040000	1306500000	731920000	791610000	257	20460000	20085000	21568000	43549000	24397000	26387000	21874000	19277000	20734000	27355000	18412000	16709000	16345000	13540000	12459000	21631000	13625000	16743000	17539000	16195000	16704000	25999000	21694000
O88342	WDR1_MOUSE	WD repeat-containing protein 1 (Actin-interacting protein 1) (AIP1)	Wdr1	1	27	27	27	323.31	258	304820000	8.48404	11888000000	10.0751	1052100000	1052500000	1038300000	650890000	551330000	418160000	1100200000	1096300000	934420000	1026100000	1294400000	1673300000	258	28210000	28110000	23959000	26310000	33190000	42905000	26976000	26988000	26624000	16690000	14137000	10722000	34103000	32516000	30375000	36328000	35053000	38123000	29839000	28142000	29835000	31885000	30518000
P70195	PSB7_MOUSE	Proteasome subunit beta type-7 (EC 3.4.25.1) (Macropain chain Z) (Multicatalytic endopeptidase complex chain Z) (Proteasome subunit Z)	Psmb7 Mmc14	1	10	10	10	126	259	304220000	8.48319	4259000000	9.62931	589500000	597050000	412430000	205710000	207300000	138590000	367380000	298260000	276290000	300320000	331260000	534140000	259	26242000	21304000	19735000	21452000	23662000	38153000	42107000	42646000	29459000	14693000	14807000	9899500	9958700	11280000	10838000	7548100	9381000	14268000	13775000	13334000	16633000	8174800	9713800
Q8BHN3	GANAB_MOUSE	Neutral alpha-glucosidase AB (EC 3.2.1.84) (Alpha-glucosidase 2) (Glucosidase II subunit alpha)	Ganab G2an Kiaa0088	1	47	47	47	323.31	260	303080000	8.48156	17579000000	10.245	1922300000	2026300000	1950800000	2229000000	1804800000	1374600000	630040000	620990000	783440000	876380000	1368500000	1991400000	260	10863000	10707000	13508000	15110000	23596000	34334000	33143000	34937000	33634000	38431000	31117000	23700000	24418000	24829000	30124000	32523000	40691000	44502000	51553000	50840000	57142000	96233000	82446000
P22935	RABP2_MOUSE	Cellular retinoic acid-binding protein 2 (Cellular retinoic acid-binding protein II) (CRABP-II)	Crabp2	2	9	9	9	252.57	261	300720000	8.47816	4210100000	9.62429	371170000	292670000	357200000	214150000	165540000	159980000	285370000	334050000	254720000	474630000	573120000	727530000	261	20383000	23861000	18194000	33902000	40937000	51967000	26512000	20905000	25514000	15297000	11825000	11427000	9694400	9851100	8905100	15659000	14481000	15958000	11408000	7741700	11113000	10536000	8989500
O88398	AVIL_MOUSE	Advillin (Actin-binding protein DOC6) (p92)	Avil Advil	1	36	36	36	323.31	262	300660000	8.47808	17438000000	10.2415	1700200000	1491500000	1554600000	890500000	853950000	630220000	1101300000	1174700000	1108200000	2120400000	2210600000	2600800000	262	18988000	20253000	19107000	36558000	38114000	44842000	29313000	25716000	26804000	15353000	14723000	10866000	39605000	42576000	43219000	65442000	57688000	58302000	50434000	44971000	48651000	37661000	38534000
O35188	X3CL1_MOUSE	Fractalkine (C-X3-C motif chemokine 1) (CX3C membrane-anchored chemokine) (Neurotactin) (Small-inducible cytokine D1) [Cleaved into: Processed fractalkine]	Cx3cl1 Cx3c Fkn Scyd1	1	10	10	10	257.82	263	300200000	8.47741	5403700000	9.73269	418590000	493540000	375820000	150360000	1109700000	308880000	82365000	51221000	81795000	886580000	872120000	572640000	263	4575800	2845600	4544100	49255000	48451000	31814000	23255000	27419000	20879000	8353400	61652000	17160000	4536200	0	4159900	24206000	19140000	18797000	18298000	19686000	17599000	7971400	42158000
P62320	SMD3_MOUSE	Small nuclear ribonucleoprotein Sm D3 (Sm-D3) (snRNP core protein D3)	Snrpd3	1	5	5	5	186.5	264	299730000	8.47673	2997300000	9.47673	313860000	315310000	305340000	224600000	201080000	109710000	199400000	216080000	205180000	231810000	277160000	397790000	264	19940000	21608000	20518000	23181000	27716000	39779000	31386000	31531000	30534000	22460000	20108000	10971000	6874300	7464900	7506200	8401300	8845500	7951500	7705800	7918400	9606400	9019000	9201100
Q9CZM2	RL15_MOUSE	60S ribosomal protein L15	Rpl15	1	9	9	9	26.005	265	298220000	8.47454	4771500000	9.67865	431480000	384550000	385190000	114160000	99636000	60738000	817820000	848720000	691550000	301350000	288040000	347210000	265	51114000	53045000	43222000	18834000	18002000	21701000	26968000	24035000	24074000	7134800	6227300	3796100	25976000	26325000	25403000	10247000	8574800	8106800	9645300	9023000	10535000	8544900	5205300
P97351	RS3A_MOUSE	40S ribosomal protein S3a (Protein TU-11)	Rps3a Rps3a1	1	16	16	16	150.91	266	294460000	8.46903	7361500000	9.86697	505330000	289860000	439210000	258510000	154680000	128850000	1390300000	1480900000	1212100000	370730000	621480000	508810000	266	55610000	59235000	48485000	14829000	24859000	20352000	20213000	11595000	17568000	10341000	6187200	5153900	39774000	40202000	37890000	15565000	15563000	13327000	14337000	14601000	18482000	11940000	9217200
O54962	BAF_MOUSE	Barrier-to-autointegration factor (Breakpoint cluster region protein 1) (LAP2-binding protein 1) [Cleaved into: Barrier-to-autointegration factor, N-terminally processed]	Banf1 Baf Bcrp1 L2bp1	1	4	4	4	22.765	267	293400000	8.46746	2347200000	9.37055	205400000	173560000	148180000	186060000	139480000	81746000	283850000	253470000	175270000	134120000	270660000	295410000	267	35481000	31684000	21909000	16765000	33833000	36927000	25675000	21695000	18523000	23257000	17435000	10218000	8525300	8042800	7191400	3861900	7017300	6556500	5257800	5006600	4567500	7076000	7052000
P28656	NP1L1_MOUSE	Nucleosome assembly protein 1-like 1 (Brain protein DN38) (NAP-1-related protein)	Nap1l1 Nrp	1	14	14	12	323.31	268	290870000	8.4637	5235700000	9.71897	288890000	330470000	331230000	158490000	100880000	65526000	1111300000	1087600000	902450000	200030000	327090000	331730000	268	61740000	60422000	50136000	11113000	18172000	18429000	16049000	18359000	18402000	8804800	5604600	3640300	34315000	33012000	30575000	8320700	9723300	7825800	8287500	9342200	9801500	6752400	5973000
Q8K482	EMIL2_MOUSE	EMILIN-2 (Basilin) (Elastin microfibril interface-located protein 2) (Elastin microfibril interfacer 2)	Emilin2	1	36	36	36	323.31	269	290800000	8.46359	20065000000	10.3024	1522600000	1467700000	1244200000	928440000	3074100000	1023800000	1428100000	1577100000	1546700000	1701100000	1942500000	2609100000	269	20698000	22856000	22416000	24654000	28153000	37813000	22066000	21270000	18032000	13456000	44552000	14838000	43909000	47070000	50069000	55129000	53817000	59590000	48054000	49896000	45587000	39522000	131120000
P20334	TNR9_MOUSE	Tumor necrosis factor receptor superfamily member 9 (4-1BB ligand receptor) (T-cell antigen 4-1BB) (CD antigen CD137)	Tnfrsf9 Cd137 Ila Ly63	1	7	7	7	199.89	270	290560000	8.46324	3777300000	9.57718	482330000	631850000	465400000	671440000	86518000	209420000	0	0	0	281780000	377600000	570930000	270	0	0	0	21675000	29046000	43918000	37103000	48604000	35800000	51649000	6655200	16109000	0	0	0	9885600	11674000	12949000	16162000	22463000	15471000	20802000	5381300
Q9R1P3	PSB2_MOUSE	Proteasome subunit beta type-2 (EC 3.4.25.1) (Macropain subunit C7-I) (Multicatalytic endopeptidase complex subunit C7-I) (Proteasome component C7-I)	Psmb2	1	15	15	15	69.616	271	289310000	8.46136	3761000000	9.5753	352730000	346820000	329340000	274350000	224770000	184550000	261200000	222140000	258160000	405560000	421620000	479780000	271	20093000	17088000	19858000	31197000	32432000	36906000	27133000	26678000	25333000	21104000	17290000	14196000	8259800	7386700	9054700	13150000	11001000	11494000	9446500	8688300	9612500	11438000	11297000
Q9Z1N5	DX39B_MOUSE	Spliceosome RNA helicase Ddx39b (EC 3.6.4.13) (56 kDa U2AF65-associated protein) (DEAD box protein UAP56) (HLA-B-associated transcript 1 protein)	Ddx39b Bat1 Bat1a Uap56	1	19	19	9	132.83	272	287700000	8.45894	8343400000	9.92134	714960000	871270000	757230000	376640000	403740000	307870000	841280000	767920000	865830000	643000000	782390000	1011300000	272	29010000	26480000	29856000	22173000	26979000	34871000	24654000	30044000	26111000	12987000	13922000	10616000	24974000	23804000	29509000	21451000	22676000	22100000	21215000	23947000	23767000	18278000	20117000
Q91VI7	RINI_MOUSE	Ribonuclease inhibitor (Ribonuclease/angiogenin inhibitor 1)	Rnh1 Rnh	1	25	25	25	323.31	273	286200000	8.45667	8013500000	9.90382	630890000	738610000	589630000	434150000	406810000	224110000	726100000	695880000	566050000	844300000	953090000	1203900000	273	25932000	24853000	20216000	30153000	34039000	42995000	22532000	26379000	21058000	15505000	14529000	8004100	23428000	22766000	19166000	25096000	25042000	25974000	19551000	20207000	20175000	20278000	22082000
Q8VDD5	MYH9_MOUSE	Myosin-9 (Cellular myosin heavy chain, type A) (Myosin heavy chain 9) (Myosin heavy chain, non-muscle IIa) (Non-muscle myosin heavy chain A) (NMMHC-A) (Non-muscle myosin heavy chain IIa) (NMMHC II-a) (NMMHC-IIA)	Myh9	1	129	129	106	323.31	274	285390000	8.45544	45091000000	10.6541	3200800000	3425100000	3409800000	1992400000	1533500000	1410400000	5353100000	5303200000	4839100000	4467800000	4902200000	5243800000	274	33881000	33565000	30627000	28277000	31027000	33189000	20258000	21678000	21581000	12610000	9705900	8926600	113570000	165820000	157330000	171850000	91343000	137300000	107120000	113290000	122320000	115170000	50349000
Q8VHB5	CAH9_MOUSE	Carbonic anhydrase 9 (EC 4.2.1.1) (Carbonate dehydratase IX) (Carbonic anhydrase IX) (CA-IX) (CAIX) (Membrane antigen MN homolog)	Ca9 Car9	1	8	8	8	44.653	275	285050000	8.45492	3705700000	9.56887	722430000	734680000	580430000	433700000	313670000	224630000	0	0	8437000	130440000	246430000	310870000	275	0	0	649000	10034000	18956000	23913000	55572000	56514000	44648000	33361000	24128000	17279000	0	0	646960	3900800	6903500	5930100	18283000	19212000	13970000	22230000	15517000
P56959	FUS_MOUSE	RNA-binding protein FUS (Protein pigpen)	Fus	1	12	12	12	134.9	276	282160000	8.4505	6771800000	9.8307	602920000	587540000	607220000	410830000	450970000	336330000	502310000	491670000	619450000	608610000	746720000	807180000	276	20930000	20486000	25811000	25359000	31113000	33633000	25122000	24481000	25301000	17118000	18790000	14014000	17892000	18802000	21834000	20170000	20351000	18589000	18248000	15179000	17744000	17077000	18537000
P62317	SMD2_MOUSE	Small nuclear ribonucleoprotein Sm D2 (Sm-D2) (snRNP core protein D2)	Snrpd2	1	9	9	9	170.54	277	281720000	8.44982	2253800000	9.35292	160490000	188690000	193670000	155640000	167150000	119550000	182860000	184360000	157780000	236800000	246530000	251740000	277	22857000	23045000	19722000	29600000	30816000	31467000	20061000	23586000	24208000	19455000	20893000	14944000	5518600	5488600	5916800	7278600	6430000	6031100	5462300	5318800	8079100	6892000	7776000
P42208	SEPT2_MOUSE	Septin-2 (Neural precursor cell expressed developmentally down-regulated protein 5) (NEDD-5)	Sept2 Nedd-5 Nedd5	1	17	16	16	323.31	278	279320000	8.4461	6703600000	9.82631	596800000	550980000	481040000	425420000	325640000	277810000	621300000	568170000	539380000	638340000	836740000	841670000	278	25887000	23674000	22474000	26598000	34864000	35070000	24866000	22957000	20043000	17726000	13568000	11575000	17548000	17125000	18637000	19199000	23083000	21310000	17591000	17268000	16826000	18460000	16210000
Q9R1P4	PSA1_MOUSE	Proteasome subunit alpha type-1 (EC 3.4.25.1) (Macropain subunit C2) (Multicatalytic endopeptidase complex subunit C2) (Proteasome component C2) (Proteasome nu chain)	Psma1	1	14	14	14	111.35	279	275730000	8.44048	5790400000	9.76271	447580000	534570000	507530000	400210000	328240000	273880000	403720000	405350000	402150000	480430000	741950000	855570000	279	19225000	19303000	19150000	22878000	35331000	40742000	21313000	25456000	24168000	19058000	15630000	13042000	13055000	13231000	14292000	17328000	18842000	17482000	12821000	13686000	14205000	19566000	17757000
Q8QZR4	OAF_MOUSE	Out at first protein homolog	Oaf D9Ucla1	1	12	12	12	107.14	280	275220000	8.43968	4403500000	9.6438	548490000	546190000	463770000	293570000	330300000	133240000	285700000	359700000	309220000	255900000	343910000	533170000	280	17857000	22481000	19326000	15993000	21495000	33323000	34280000	34137000	28986000	18348000	20644000	8327400	9570600	11072000	10880000	9969700	10810000	12620000	14349000	14736000	12875000	13772000	15003000
P80314	TCPB_MOUSE	T-complex protein 1 subunit beta (TCP-1-beta) (CCT-beta)	Cct2 Cctb	1	35	35	35	320.55	281	274700000	8.43886	11263000000	10.0517	1097200000	1080000000	956030000	602650000	621700000	417660000	1037900000	663980000	731390000	1087500000	1264100000	1702500000	281	25314000	16195000	17839000	26524000	30832000	41525000	26761000	26342000	23318000	14699000	15163000	10187000	31559000	29438000	33915000	31568000	35058000	32654000	29270000	27263000	31279000	30803000	23929000
Q91ZJ9	HYAL1_MOUSE	Hyaluronidase-1 (Hyal-1) (EC 3.2.1.35) (Hyaluronoglucosaminidase-1)	Hyal1	1	5	5	5	112.09	282	274250000	8.43815	4936500000	9.69342	941970000	1167300000	830280000	475890000	239900000	183370000	31980000	23077000	24260000	160650000	382880000	474920000	282	1776700	1282100	1347800	8925200	21271000	26384000	52332000	64851000	46127000	26439000	13328000	10187000	961200	777430	1025100	6214600	11145000	10899000	18467000	30167000	24594000	22507000	13970000
P61358	RL27_MOUSE	60S ribosomal protein L27	Rpl27	1	7	7	7	18.646	283	274000000	8.43775	2740000000	9.43775	192600000	181160000	210420000	106950000	56446000	50737000	474500000	464650000	460900000	148760000	171700000	221180000	283	47450000	46465000	46090000	14876000	17170000	22118000	19260000	18116000	21042000	10695000	5644600	5073700	16652000	14459000	16398000	4744400	4945100	4963900	4358700	5235800	6288500	4319600	3548900
Q8CG14	CS1A_MOUSE	Complement C1s-A subcomponent (EC 3.4.21.42) (C1 esterase) (Complement component 1 subcomponent s-A) [Cleaved into: Complement C1s-A subcomponent heavy chain; Complement C1s-A subcomponent light chain]	C1sa C1s	2	25	25	25	323.31	284	271390000	8.43359	8141600000	9.91071	1081100000	1159000000	796420000	1659200000	789640000	562470000	0	0	0	576640000	567000000	950060000	284	0	0	0	19221000	18900000	31669000	36037000	38633000	26547000	55308000	26321000	18749000	0	0	0	19857000	19107000	22253000	30330000	36256000	28017000	65996000	35659000
P62830	RL23_MOUSE	60S ribosomal protein L23	Rpl23	1	8	8	8	55.167	285	269530000	8.43061	2425800000	9.38485	236160000	206690000	262740000	82575000	69251000	48776000	312070000	333160000	255470000	148790000	199640000	270450000	285	34675000	37018000	28385000	16533000	22182000	30050000	26240000	22965000	29193000	9175000	7694500	5419500	9334200	9970900	9181800	5542500	5575900	5508100	5819100	6050300	6859400	4564400	4110200
P12032	TIMP1_MOUSE	Metalloproteinase inhibitor 1 (Collagenase inhibitor 16C8 fibroblast) (Erythroid-potentiating activity) (EPA) (TPA-S1) (TPA-induced protein) (Tissue inhibitor of metalloproteinases 1) (TIMP-1)	Timp1 Timp Timp-1	1	6	6	6	37.332	286	268020000	8.42817	3484300000	9.54212	489870000	360430000	393560000	116130000	186920000	33507000	353370000	341980000	366420000	210590000	223560000	407920000	286	27182000	26306000	28186000	16199000	17197000	31378000	37682000	27726000	30274000	8932900	14378000	2577500	10841000	11104000	11032000	7422400	6534500	9878900	12338000	10287000	11037000	6940600	9128900
P24472	GSTA4_MOUSE	Glutathione S-transferase A4 (EC 2.5.1.18) (GST A4-4) (GSTA4-4) (GST class-alpha member 4) (Glutathione S-transferase 5.7) (GST 5.7)	Gsta4 Gsta	1	9	9	7	33.341	287	266810000	8.4262	3468600000	9.54015	212390000	203430000	185520000	207860000	160590000	135770000	327860000	318560000	285490000	412360000	502820000	515930000	287	25220000	24504000	21961000	31720000	38678000	39687000	16338000	15648000	14271000	15989000	12353000	10444000	8986500	9505500	9012500	13244000	11804000	12636000	7307000	6496100	8148000	9209900	7711500
Q9WVJ9	FBLN4_MOUSE	EGF-containing fibulin-like extracellular matrix protein 2 (Fibulin-4) (FIBL-4) (Mutant p53-binding protein 1)	Efemp2 Fbln4 Mbp1	1	15	15	15	314.24	288	265070000	8.42336	6891900000	9.83834	733220000	774570000	700720000	696580000	676480000	412160000	243700000	244070000	287060000	566500000	622710000	934080000	288	9373100	9387200	11041000	21789000	23950000	35926000	28201000	29791000	26951000	26791000	26018000	15852000	10470000	11561000	13018000	18305000	17671000	22417000	22433000	22649000	23949000	25206000	28972000
Q99P91	GPNMB_MOUSE	Transmembrane glycoprotein NMB (DC-HIL) (Dendritic cell-associated transmembrane protein) (Osteoactivin)	Gpnmb Dchil Hgfin Nmb	1	16	16	16	323.31	289	264980000	8.42321	7154500000	9.85458	852460000	935330000	777730000	414000000	1361400000	623750000	115970000	107880000	114920000	389870000	612950000	848310000	289	4295200	3995600	4256300	14439000	22702000	31419000	31573000	34642000	28805000	15334000	50421000	23102000	4401200	4136800	4835700	10941000	17222000	21221000	26726000	28273000	25599000	16693000	56750000
Q61024	ASNS_MOUSE	Asparagine synthetase [glutamine-hydrolyzing] (EC 6.3.5.4) (Glutamine-dependent asparagine synthetase)	Asns	1	26	26	26	199.55	290	264460000	8.42236	11372000000	10.0558	687010000	593250000	546520000	354500000	327850000	264220000	1706300000	1551300000	1262500000	1159400000	1376700000	1542000000	290	39680000	36076000	29361000	26964000	32017000	35860000	15977000	13796000	12710000	8244100	7624500	6144600	49264000	48522000	44106000	36207000	35481000	34470000	20271000	18120000	19461000	16260000	15547000
P84089	ERH_MOUSE	Enhancer of rudimentary homolog (Mer)	Erh	1	5	5	5	224.36	291	263590000	8.42093	1581500000	9.19907	155460000	126850000	110320000	147980000	161690000	102630000	125520000	101330000	81387000	182710000	125740000	159920000	291	20920000	16889000	13565000	30452000	20957000	26653000	25910000	21142000	18387000	24663000	26949000	17105000	4272800	3177800	4211200	4665700	4155000	3664000	4754200	3442200	0	5891500	7893400
Q9CZ44	NSF1C_MOUSE	NSFL1 cofactor p47 (p97 cofactor p47)	Nsfl1c	1	18	18	18	315.71	292	262920000	8.41982	7624600000	9.88222	660650000	512600000	593190000	385380000	357870000	226460000	663720000	724410000	658620000	837430000	901850000	1102400000	292	22887000	24980000	22711000	28877000	31098000	38014000	22781000	17676000	20455000	13289000	12340000	7809000	19864000	22327000	20148000	27211000	24974000	24364000	19651000	15194000	18926000	18267000	17604000
P62774	MTPN_MOUSE	Myotrophin (Granule cell differentiation protein) (Protein V-1)	Mtpn Gcdp	1	7	7	7	167.83	293	262910000	8.41981	2629100000	9.41981	200670000	229640000	225430000	156470000	111990000	56008000	225880000	220590000	167300000	336370000	303990000	394810000	293	22588000	22059000	16730000	33637000	30399000	39481000	20067000	22964000	22543000	15647000	11199000	5600800	6491800	6690100	4883700	10586000	7808100	8383100	7689500	7162800	7659500	6724800	6216300
Q91VW3	SH3L3_MOUSE	SH3 domain-binding glutamic acid-rich-like protein 3	Sh3bgrl3	1	3	3	3	46.241	294	260690000	8.41612	1564100000	9.19426	106540000	84297000	109080000	64810000	125290000	77457000	133510000	92752000	63885000	170270000	279300000	256930000	294	22251000	15459000	10647000	28378000	46551000	42822000	17757000	14049000	18181000	10802000	20882000	12910000	4166300	4482700	3346400	3205600	6588700	5452900	4214100	3495400	4514500	3709100	4272000
P99026	PSB4_MOUSE	Proteasome subunit beta type-4 (EC 3.4.25.1) (Low molecular mass protein 3) (Macropain beta chain) (Multicatalytic endopeptidase complex beta chain) (Proteasome beta chain) (Proteasome chain 3)	Psmb4 Lmp3	1	8	8	8	186.01	295	260400000	8.41564	3906100000	9.59174	268140000	268210000	337030000	249310000	240920000	186590000	359300000	331350000	331060000	432850000	445920000	455380000	295	23953000	22090000	22071000	28857000	29728000	30359000	17876000	17881000	22469000	16621000	16061000	12440000	10197000	8860000	9952300	9875900	12636000	13206000	8346400	9181800	10335000	11848000	12225000
Q9CZX8	RS19_MOUSE	40S ribosomal protein S19	Rps19	1	8	8	8	26.568	296	260270000	8.41542	3643800000	9.56155	266280000	222230000	197590000	194980000	93700000	47175000	606310000	649020000	443800000	275830000	279540000	367320000	296	43308000	46359000	31700000	19702000	19967000	26237000	19020000	15874000	14114000	13927000	6692900	3369600	19072000	20717000	14781000	9182900	7478500	8078400	7374000	6482400	7012500	8890200	5180500
P11031	TCP4_MOUSE	Activated RNA polymerase II transcriptional coactivator p15 (Positive cofactor 4) (PC4) (SUB1 homolog) (Single-stranded DNA-binding protein p9) (p14)	Sub1 Pc4 Rpo2tc1	1	7	7	7	80.232	297	258590000	8.41261	2844400000	9.45399	213450000	208550000	197800000	260060000	197470000	130160000	237150000	253110000	141190000	188420000	389320000	427750000	297	21559000	23010000	12836000	17129000	35393000	38887000	19405000	18959000	17982000	23642000	17952000	11833000	7855200	7988800	6391200	5778100	10291000	10329000	6343200	6358900	6529500	10384000	8756100
P84104	SRSF3_MOUSE	Serine/arginine-rich splicing factor 3 (Pre-mRNA-splicing factor SRP20) (Protein X16) (Splicing factor, arginine/serine-rich 3)	Srsf3 Sfrs3 Srp20 X16	1	8	8	7	39.461	298	258130000	8.41184	3097500000	9.49101	262890000	261400000	266700000	134180000	195410000	110510000	299500000	289580000	234760000	345520000	334860000	362080000	298	24958000	24131000	19563000	28793000	27905000	30173000	21908000	21784000	22225000	11182000	16284000	9209000	7213000	8348500	7539700	9048800	8751300	5792500	5486100	5744000	8849700	7734400	11148000
P25444	RS2_MOUSE	40S ribosomal protein S2 (40S ribosomal protein S4) (Protein LLRep3)	Rps2 Llrep3 Rps4	1	13	13	13	68.948	299	257620000	8.41098	6183000000	9.7912	404980000	410720000	419380000	243380000	143270000	101330000	1069900000	1016200000	1003100000	380020000	449960000	540750000	299	44579000	42341000	41795000	15834000	18748000	22531000	16874000	17113000	17474000	10141000	5969400	4221900	31845000	30919000	32795000	12550000	12652000	11365000	11148000	11251000	12883000	11077000	8568100
P17563	SBP1_MOUSE	Methanethiol oxidase (MTO) (EC 1.8.3.4) (56 kDa selenium-binding protein) (SBP56) (SP56) (Selenium-binding protein 1)	Selenbp1 Lpsb	2	29	29	29	274.88	300	256330000	8.4088	8202600000	9.91395	928440000	843150000	876360000	750200000	506020000	406540000	51937000	67946000	33670000	1103100000	1365100000	1217600000	300	1623000	2123300	1052200	34471000	42660000	38050000	29014000	26349000	27386000	23444000	15813000	12704000	2214100	3427600	2438900	34105000	38170000	27291000	22555000	20740000	24850000	41419000	20641000
P62751	RL23A_MOUSE	60S ribosomal protein L23a	Rpl23a	1	6	6	6	30.604	301	255260000	8.40698	2552600000	9.40698	194840000	185100000	167350000	108710000	75302000	54995000	387570000	397190000	326680000	189250000	211190000	245680000	301	38757000	39719000	32668000	18925000	21119000	24568000	19484000	18510000	16735000	10871000	7530200	5499500	11414000	12292000	9906800	7380400	6523000	4999400	6059500	4752900	4928600	5503600	4199700
Q8VHY0	CSPG4_MOUSE	Chondroitin sulfate proteoglycan 4 (Chondroitin sulfate proteoglycan NG2) (Proteoglycan AN2)	Cspg4 An2 Kiaa4232 Ng2	1	66	66	66	323.31	302	253720000	8.40435	24865000000	10.3956	3063400000	3002800000	2358200000	1321400000	2301200000	953840000	1933000000	1912600000	1878600000	1551200000	1915900000	2671300000	302	19725000	19516000	19170000	15829000	19550000	27258000	31259000	30641000	24063000	13484000	23481000	9733100	62090000	64188000	68777000	56135000	53854000	61009000	77614000	79384000	70190000	58424000	107890000
P35505	FAAA_MOUSE	Fumarylacetoacetase (FAA) (EC 3.7.1.2) (Beta-diketonase) (Fumarylacetoacetate hydrolase)	Fah	1	17	17	17	116.57	303	251770000	8.401	6294100000	9.79893	562330000	638610000	440330000	389980000	328870000	303750000	438080000	388850000	403540000	527980000	873930000	997890000	303	17523000	15554000	16141000	21119000	34957000	39916000	22493000	25544000	17613000	15599000	13155000	12150000	15185000	13824000	11623000	17493000	21781000	23321000	16535000	17513000	15502000	16669000	16954000
P05063	ALDOC_MOUSE	Fructose-bisphosphate aldolase C (EC 4.1.2.13) (Aldolase 3) (Brain-type aldolase) (Scrapie-responsive protein 2) (Zebrin II)	Aldoc Aldo3 Scrg2	1	24	22	22	307.31	304	251210000	8.40004	6782500000	9.83139	664150000	742160000	592630000	826350000	334550000	292200000	40511000	76034000	30816000	881430000	1066000000	1229300000	304	1500400	2816100	1141300	32646000	39480000	45531000	24598000	27487000	21949000	30605000	12391000	10822000	1964100	3826100	1504500	31038000	29045000	27891000	20809000	20706000	20673000	31872000	15164000
Q61316	HSP74_MOUSE	Heat shock 70 kDa protein 4 (Heat shock 70-related protein APG-2)	Hspa4 Apg2 Hsp110	1	39	39	37	323.31	305	250910000	8.39952	15305000000	10.1848	1352400000	1287100000	1286100000	796650000	828240000	526410000	1427100000	1359800000	1170700000	1233100000	1789700000	2247900000	305	23395000	22291000	19192000	20215000	29340000	36850000	22170000	21100000	21084000	13060000	13578000	8629700	45497000	45421000	41542000	41763000	46603000	46092000	38441000	36651000	40418000	34672000	36667000
P58022	LOXL2_MOUSE	Lysyl oxidase homolog 2 (EC 1.4.3.13) (Lysyl oxidase-like protein 2)	Loxl2	1	23	23	23	323.31	306	250740000	8.39922	12035000000	10.0804	1823000000	1824800000	1501300000	903800000	631250000	513950000	233570000	217600000	257070000	1148800000	1340100000	1640200000	306	4866100	4533300	5355600	23932000	27919000	34171000	37980000	38017000	31277000	18829000	13151000	10707000	7733100	7108300	8292200	30309000	29437000	34665000	52125000	50597000	48349000	28154000	23020000
Q9CR75	TNR12_MOUSE	Tumor necrosis factor receptor superfamily member 12A (Fibroblast growth factor-inducible immediate-early response protein 14) (FGF-inducible 14) (Fibroblast growth factor-regulated protein 2) (Tweak-receptor) (TweakR) (CD antigen CD266)	Tnfrsf12a Fgfrp2 Fn14	1	2	2	2	21.761	307	241080000	8.38216	1687500000	9.22724	240450000	271150000	223860000	102920000	88796000	33166000	131910000	186600000	147460000	32638000	0	228600000	307	18844000	26657000	21065000	4662600	0	32656000	34349000	38736000	31980000	14703000	12685000	4738000	0	5955600	4990800	0	0	5867900	6509900	6952700	6406500	4640000	3881200
P26638	SYSC_MOUSE	Serine--tRNA ligase, cytoplasmic (EC 6.1.1.11) (Seryl-tRNA synthetase) (SerRS) (Seryl-tRNA(Ser/Sec) synthetase)	Sars Sars1 Sers	2	26	26	26	225.15	308	239900000	8.38003	9836000000	9.99282	825850000	815650000	785380000	504040000	320060000	298500000	808290000	807670000	659740000	1152900000	1260900000	1597000000	308	19714000	19699000	16091000	28119000	30755000	38952000	20143000	19894000	19156000	12294000	7806400	7280500	26621000	26865000	23665000	36879000	34685000	33956000	22387000	22616000	24467000	25475000	17933000
P62309	RUXG_MOUSE	Small nuclear ribonucleoprotein G (snRNP-G) (Sm protein G) (Sm-G) (SmG)	Snrpg	1	3	3	3	14.02	309	239550000	8.3794	958190000	8.98145	38574000	42667000	36222000	78797000	82864000	50835000	124640000	100650000	108280000	95354000	136160000	62965000	309	31161000	25162000	27071000	23839000	34041000	15741000	9643500	10667000	9055500	19699000	20716000	12709000	3519600	2839800	3247200	2524200	3476500	3159300	2416200	2654000	2257500	2542100	2959900
P80318	TCPG_MOUSE	T-complex protein 1 subunit gamma (TCP-1-gamma) (CCT-gamma) (Matricin) (mTRiC-P5)	Cct3 Cctg	1	33	33	33	244	310	238790000	8.37802	10507000000	10.0215	847030000	858560000	730790000	579560000	407310000	294950000	1384300000	1781200000	643200000	800580000	1053300000	1126000000	310	31462000	40482000	14618000	18195000	23939000	25592000	19251000	19513000	16609000	13172000	9257000	6703300	29064000	26386000	28520000	26977000	33960000	29668000	26828000	27306000	27901000	30390000	24505000
P63028	TCTP_MOUSE	Translationally-controlled tumor protein (TCTP) (21 kDa polypeptide) (p21) (p23)	Tpt1 Trt	1	4	4	4	56.38	311	238630000	8.37773	1909100000	9.28083	102640000	114060000	170280000	90586000	69573000	66394000	270180000	244210000	198190000	204180000	199890000	178890000	311	33772000	30527000	24774000	25522000	24987000	22362000	12830000	14258000	21285000	11323000	8696600	8299300	9144400	8205900	7740000	5282000	5592800	4923000	4328600	3457400	4202100	4491200	3345800
P47911	RL6_MOUSE	60S ribosomal protein L6 (TAX-responsive enhancer element-binding protein 107) (TAXREB107)	Rpl6	1	13	13	13	281.36	312	237210000	8.37513	5693000000	9.75534	356380000	284090000	435910000	193230000	105040000	62882000	1196000000	1118300000	908170000	255360000	301570000	476150000	312	49832000	46595000	37841000	10640000	12566000	19839000	14849000	11837000	18163000	8051300	4376800	2620100	34129000	34344000	30648000	10080000	9758800	10717000	10918000	10011000	11531000	10236000	6021400
Q9DCD0	6PGD_MOUSE	6-phosphogluconate dehydrogenase, decarboxylating (EC 1.1.1.44)	Pgd	1	26	26	26	239.47	313	237020000	8.37478	8295900000	9.91886	566660000	575040000	560140000	455030000	351600000	297940000	805750000	807140000	659740000	892390000	1054200000	1270000000	313	23022000	23061000	18850000	25497000	30121000	36286000	16190000	16430000	16004000	13001000	10046000	8512500	25188000	25181000	22476000	27972000	29823000	29614000	17961000	17714000	19007000	20395000	18460000
Q99K41	EMIL1_MOUSE	EMILIN-1 (Elastin microfibril interface-located protein 1) (Elastin microfibril interfacer 1)	Emilin1	1	38	38	38	323.31	314	236700000	8.3742	14675000000	10.1666	1910100000	1820900000	1634800000	475660000	1397600000	629760000	396530000	587560000	531620000	1280500000	1518100000	2490800000	314	6395700	9476700	8574500	20653000	24485000	40174000	30808000	29369000	26368000	7672000	22542000	10157000	15998000	19311000	20549000	42729000	39103000	53272000	50417000	49493000	47105000	22817000	55222000
Q99020	ROAA_MOUSE	Heterogeneous nuclear ribonucleoprotein A/B (hnRNP A/B) (CArG-binding factor-A) (CBF-A)	Hnrnpab Cbf-a Cgbfa Hnrpab	1	11	11	11	110.54	315	235780000	8.37251	4479900000	9.65127	331620000	430060000	321080000	157020000	164000000	137060000	576070000	599630000	578730000	210690000	497850000	476080000	315	30319000	31559000	30460000	11089000	26203000	25057000	17454000	22635000	16899000	8264100	8631700	7213500	17073000	17187000	19488000	11578000	13096000	11101000	9971100	11307000	9955600	8151800	9293200
O09061	PSB1_MOUSE	Proteasome subunit beta type-1 (EC 3.4.25.1) (Macropain subunit C5) (Multicatalytic endopeptidase complex subunit C5) (Proteasome component C5) (Proteasome gamma chain)	Psmb1	1	7	7	7	46.401	316	235500000	8.37199	3768000000	9.57611	395860000	392000000	422220000	231990000	214510000	150670000	258010000	251450000	206470000	298650000	324310000	621870000	316	16125000	15716000	12904000	18666000	20269000	38867000	24741000	24500000	26389000	14500000	13407000	9416800	8565800	7997700	7701100	9104900	9538000	12109000	9327000	10131000	10979000	12377000	11330000
Q920E5	FPPS_MOUSE	Farnesyl pyrophosphate synthase (FPP synthase) (FPS) (EC 2.5.1.10) ((2E,6E)-farnesyl diphosphate synthase) (Cholesterol-regulated 39 kDa protein) (CR 39) (Dimethylallyltranstransferase) (EC 2.5.1.1) (Farnesyl diphosphate synthase) (Geranyltranstransferase)	Fdps	1	11	11	11	179.31	317	233180000	8.36769	4896800000	9.68991	294050000	268550000	324450000	236890000	134210000	127270000	603400000	664460000	467520000	478920000	608210000	688850000	317	28733000	31641000	22263000	22806000	28963000	32803000	14002000	12788000	15450000	11280000	6390700	6060500	17912000	18397000	16515000	13879000	16479000	14853000	9432400	9701200	11057000	9307900	6003600
P14131	RS16_MOUSE	40S ribosomal protein S16	Rps16	1	8	8	8	27.233	318	231470000	8.36449	3240600000	9.51063	261190000	249920000	258060000	145650000	56612000	40272000	582230000	543510000	499740000	156670000	207010000	239710000	318	41588000	38822000	35696000	11191000	14787000	17122000	18657000	17851000	18433000	10404000	4043700	2876600	16496000	16018000	16570000	6758400	5518900	5748300	6548300	6229600	6928900	6397400	3926600
P62245	RS15A_MOUSE	40S ribosomal protein S15a	Rps15a	1	6	6	6	42.062	319	229430000	8.36065	2753100000	9.43982	188380000	207420000	222220000	135890000	82195000	63733000	416530000	462540000	326930000	172850000	217490000	256940000	319	34711000	38545000	27244000	14404000	18124000	21412000	15699000	17285000	18518000	11324000	6849600	5311100	13232000	14787000	11410000	5876300	6243600	5578700	5320000	5682300	6709300	6579500	4143900
Q62465	VAT1_MOUSE	Synaptic vesicle membrane protein VAT-1 homolog (EC 1.-.-.-)	Vat1 Vat-1	1	20	20	20	129.86	320	227910000	8.35776	5014100000	9.70019	770030000	576810000	529550000	358950000	246250000	266510000	178200000	142560000	140060000	433540000	571430000	800190000	320	8100100	6479800	6366400	19706000	25974000	36372000	35001000	26219000	24071000	16316000	11193000	12114000	7292900	7787000	7275600	13914000	15741000	14714000	15493000	14413000	15074000	13135000	12483000
O08746	MATN2_MOUSE	Matrilin-2	Matn2	1	31	31	31	323.31	321	227800000	8.35755	12757000000	10.1057	1222400000	1372500000	1265300000	879060000	608720000	626730000	802460000	942680000	913660000	967770000	1351700000	1803500000	321	14330000	16834000	16315000	17282000	24137000	32205000	21828000	24509000	22595000	15697000	10870000	11192000	27337000	29634000	31570000	33557000	38007000	41445000	35701000	38768000	38619000	37069000	31546000
Q6PDM2	SRSF1_MOUSE	Serine/arginine-rich splicing factor 1 (ASF/SF2) (Pre-mRNA-splicing factor SRp30a) (Splicing factor, arginine/serine-rich 1)	Srsf1 Sfrs1	1	12	12	11	58.887	322	227720000	8.3574	4782000000	9.67961	317930000	285540000	300340000	342480000	377290000	270750000	450410000	358220000	529220000	572460000	557520000	419850000	322	21448000	17058000	25201000	27260000	26549000	19993000	15139000	13597000	14302000	16309000	17966000	12893000	13275000	12771000	15411000	14885000	12721000	13265000	15271000	13541000	15823000	11141000	15718000
P47963	RL13_MOUSE	60S ribosomal protein L13 (A52)	Rpl13	1	9	9	9	64.945	323	225980000	8.35407	4293600000	9.63282	213710000	206590000	244670000	137860000	98820000	63136000	886590000	896090000	819120000	236740000	238260000	251980000	323	46663000	47162000	43111000	12460000	12540000	13262000	11248000	10873000	12877000	7255800	5201100	3322900	24543000	24821000	25048000	6805100	7730200	7398300	8417900	7393300	8952700	5380400	4302200
Q9QYB1	CLIC4_MOUSE	Chloride intracellular channel protein 4 (mc3s5/mtCLIC)	Clic4	1	17	17	17	323.31	324	225440000	8.35303	4283400000	9.63179	211250000	170240000	251450000	262920000	212870000	167060000	501900000	405330000	416650000	596100000	566010000	521600000	324	26416000	21333000	21929000	31374000	29790000	27453000	11119000	8960000	13234000	13838000	11204000	8792500	14267000	12440000	13335000	12126000	13113000	13314000	8236700	8750200	8298500	10879000	9080700
Q91W90	TXND5_MOUSE	Thioredoxin domain-containing protein 5 (Endoplasmic reticulum resident protein 46) (ER protein 46) (ERp46) (Plasma cell-specific thioredoxin-related protein) (PC-TRP) (Thioredoxin-like protein p46)	Txndc5 Tlp46	1	14	14	14	251.41	325	225160000	8.35249	6079200000	9.78385	462220000	470660000	512330000	783280000	847980000	503280000	321330000	381940000	373580000	391580000	416430000	614620000	325	11901000	14146000	13836000	14503000	15423000	22764000	17119000	17432000	18975000	29010000	31407000	18640000	11866000	12265000	13943000	12702000	13205000	14376000	13706000	14289000	16126000	33939000	39457000
P62911	RL32_MOUSE	60S ribosomal protein L32	Rpl32	2	8	8	8	43.005	326	224630000	8.35147	2695600000	9.43066	170890000	213530000	219650000	76117000	63965000	32548000	456820000	481060000	434410000	119970000	164010000	262630000	326	38069000	40088000	36201000	9997600	13668000	21886000	14241000	17794000	18305000	6343000	5330400	2712400	13408000	15185000	12596000	6871200	5062800	5468100	4910800	5792700	6972700	3984800	3435300
Q9Z2X1	HNRPF_MOUSE	Heterogeneous nuclear ribonucleoprotein F (hnRNP F) [Cleaved into: Heterogeneous nuclear ribonucleoprotein F, N-terminally processed]	Hnrnpf Hnrpf	1	12	10	10	155.52	327	223410000	8.3491	5585200000	9.74704	551110000	528550000	411550000	358660000	375910000	196390000	437290000	505260000	488530000	521060000	586420000	624510000	327	17491000	20210000	19541000	20842000	23457000	24980000	22044000	21142000	16462000	14346000	15036000	7855500	15955000	18187000	18078000	14885000	15602000	15242000	16161000	15841000	15602000	12927000	15348000
P50247	SAHH_MOUSE	Adenosylhomocysteinase (AdoHcyase) (EC 3.3.1.1) (CUBP) (Liver copper-binding protein) (S-adenosyl-L-homocysteine hydrolase)	Ahcy	1	20	20	20	184.91	328	223250000	8.34879	6474100000	9.81118	417270000	423610000	415950000	259620000	222060000	139950000	918610000	907620000	829890000	588190000	619300000	731740000	328	31676000	31297000	28617000	20282000	21355000	25232000	14389000	14607000	14343000	8952500	7657200	4825800	28338000	28674000	27304000	20357000	17700000	17098000	12732000	12393000	13477000	11657000	11577000
P10404	ENV1_MOUSE	MLV-related proviral Env polyprotein [Cleaved into: Surface protein (SU); Transmembrane protein (TM)]		1	16	16	13	323.31	329	221590000	8.34555	7977200000	9.90185	706160000	686960000	505970000	173050000	322960000	156170000	1306900000	1389100000	1209700000	405680000	488580000	625030000	329	36303000	38585000	33604000	11269000	13572000	17362000	19615000	19082000	14055000	4807000	8971000	4337900	42745000	47355000	42742000	13070000	15325000	16128000	17557000	18534000	14421000	6844800	13289000
P50580	PA2G4_MOUSE	Proliferation-associated protein 2G4 (IRES-specific cellular trans-acting factor 45 kDa) (ITAF45) (Mpp1) (Proliferation-associated protein 1) (Protein p38-2G4)	Pa2g4 Ebp1 Plfap	1	21	21	21	175.47	330	221550000	8.34547	6203400000	9.79263	487240000	380140000	396220000	176240000	126250000	105410000	887030000	851680000	790960000	586060000	718990000	695960000	330	31680000	30417000	28249000	20931000	25678000	24856000	17401000	13577000	14151000	6294400	4508900	3764500	25579000	24900000	22974000	19806000	18374000	17513000	13541000	13396000	15530000	10477000	6909200
P53026	RL10A_MOUSE	60S ribosomal protein L10a (CSA-19) (Neural precursor cell expressed developmentally down-regulated protein 6) (NEDD-6)	Rpl10a Nedd-6 Nedd6	1	9	9	9	41.134	331	220620000	8.34364	3529900000	9.54776	230510000	267030000	240830000	240970000	150410000	68283000	628130000	572770000	484940000	164640000	192340000	289100000	331	39258000	35798000	30309000	10290000	12021000	18069000	14407000	16690000	15052000	15060000	9400600	4267700	15990000	15242000	18100000	6577700	5977000	6869800	8227600	8044500	9064100	10587000	6494100
Q8CDN6	TXNL1_MOUSE	Thioredoxin-like protein 1 (32 kDa thioredoxin-related protein)	Txnl1 Trp32 Txnl	1	11	11	11	165.26	332	220520000	8.34345	3969400000	9.59872	259590000	338320000	271650000	162820000	164730000	83389000	416070000	367520000	383700000	400970000	512380000	608290000	332	23115000	20418000	21317000	22276000	28466000	33794000	14421000	18795000	15091000	9045800	9151600	4632700	12959000	13521000	12735000	12528000	13325000	12551000	8166800	8247500	9224400	7545600	7361500
P62838	UB2D2_MOUSE	Ubiquitin-conjugating enzyme E2 D2 (EC 2.3.2.23) ((E3-independent) E2 ubiquitin-conjugating enzyme D2) (EC 2.3.2.24) (E2 ubiquitin-conjugating enzyme D2) (Ubiquitin carrier protein D2) (Ubiquitin-conjugating enzyme E2(17)KB 2) (Ubiquitin-conjugating enzyme E2-17 kDa 2) (Ubiquitin-protein ligase D2)	Ube2d2 Ubc4 Ubch4 Ubch5b Ube2d2a	4	3	3	3	51.628	333	219880000	8.34219	1319300000	9.12034	76172000	64053000	80432000	85372000	63037000	68415000	136400000	138060000	125980000	131060000	136040000	214290000	333	22734000	23010000	20997000	21843000	22673000	35715000	12695000	10676000	13405000	14229000	10506000	11403000	4188800	4382400	4879100	4374300	3565200	5013800	2074400	2136800	2271200	3984100	2913100
Q8BGQ7	SYAC_MOUSE	Alanine--tRNA ligase, cytoplasmic (EC 6.1.1.7) (Alanyl-tRNA synthetase) (AlaRS) (Protein sticky) (Sti)	Aars	1	36	36	36	323.31	334	219100000	8.34064	15337000000	10.1857	962790000	828190000	1038400000	689960000	487160000	512000000	1872900000	1777000000	1403200000	1890300000	1755200000	2109800000	334	26755000	25386000	20046000	27004000	25074000	30139000	13754000	11831000	14835000	9856600	6959400	7314200	57799000	54966000	61988000	54248000	52623000	47877000	31010000	28774000	34129000	23234000	18289000
O55135	IF6_MOUSE	Eukaryotic translation initiation factor 6 (eIF-6) (B4 integrin interactor) (CAB) (p27(BBP))	Eif6 Itgb4bp	1	8	8	8	208.51	335	218830000	8.34011	2625900000	9.41928	273380000	174340000	260680000	120540000	147930000	62773000	221150000	188690000	194660000	294210000	330870000	346360000	335	18429000	15724000	16222000	24517000	27572000	28864000	22782000	14528000	21724000	10045000	12328000	5231100	6985400	6299300	7130500	9810700	8485700	8435500	6358900	5740400	7004200	5621600	7080600
P62301	RS13_MOUSE	40S ribosomal protein S13	Rps13	1	7	7	7	21.924	336	217730000	8.33792	2830500000	9.45186	199850000	245780000	214850000	113000000	69285000	50000000	484300000	488550000	333080000	173380000	201570000	256890000	336	37254000	37581000	25622000	13337000	15505000	19761000	15373000	18906000	16527000	8692500	5329600	3846100	15087000	15142000	12467000	5999100	5866000	5616100	5193200	6576900	6409100	5596400	4110400
P62754	RS6_MOUSE	40S ribosomal protein S6 (Phosphoprotein NP33)	Rps6	1	8	8	8	30.294	337	216690000	8.33584	4767100000	9.67825	297820000	237020000	234970000	132950000	121850000	43573000	944630000	973090000	835570000	246490000	272130000	426710000	337	42938000	44231000	37980000	11204000	12370000	19396000	13537000	10773000	10681000	6043300	5538600	1980600	26475000	27301000	24593000	11233000	9140000	9218700	9700100	8892700	8351400	7887000	5665000
Q9JHW2	NIT2_MOUSE	Omega-amidase NIT2 (EC 3.5.1.3) (Nitrilase homolog 2)	Nit2 D16Ertd502e	1	6	6	6	31.136	338	215620000	8.33369	4527900000	9.6559	907500000	786990000	787990000	153410000	251150000	115640000	89365000	75745000	79957000	244280000	404620000	631300000	338	4255500	3606900	3807500	11632000	19268000	30062000	43214000	37476000	37523000	7305200	11960000	5506600	0	5173900	5317400	0	8084400	12145000	0	0	0	0	0
O35737	HNRH1_MOUSE	Heterogeneous nuclear ribonucleoprotein H (hnRNP H) [Cleaved into: Heterogeneous nuclear ribonucleoprotein H, N-terminally processed]	Hnrnph1 Hnrph Hnrph1	2	13	13	11	119.5	339	215560000	8.33357	6251300000	9.79597	643200000	552000000	584180000	260730000	243130000	230290000	630730000	585330000	621280000	573560000	547950000	778920000	339	21749000	20184000	21423000	19778000	18895000	26859000	22179000	19035000	20144000	8990700	8383600	7941100	18912000	17710000	20215000	18357000	14904000	17380000	19777000	17993000	20623000	12529000	12714000
P70168	IMB1_MOUSE	Importin subunit beta-1 (Karyopherin subunit beta-1) (Nuclear factor p97) (Pore targeting complex 97 kDa subunit) (PTAC97) (SCG)	Kpnb1 Impnb	1	30	30	30	314.91	340	214230000	8.33088	10283000000	10.0121	840550000	709990000	756870000	569730000	505320000	381050000	1049900000	1108900000	917240000	814270000	1216400000	1412200000	340	21873000	23102000	19109000	16964000	25342000	29420000	17511000	14792000	15768000	11869000	10527000	7938600	33329000	33805000	30429000	26793000	33777000	29398000	23556000	23574000	27287000	25481000	24025000
Q61166	MARE1_MOUSE	Microtubule-associated protein RP/EB family member 1 (APC-binding protein EB1) (End-binding protein 1) (EB1)	Mapre1	2	11	11	11	67.927	341	211420000	8.32515	4228500000	9.62619	386740000	340070000	316620000	167690000	136160000	123560000	455090000	410890000	428300000	396140000	449380000	617850000	341	22754000	20545000	21415000	19807000	22469000	30892000	19337000	17004000	15831000	8384400	6808100	6178100	13695000	13100000	13988000	12197000	12188000	12918000	10327000	10484000	10440000	7073500	6716000
Q62165	DAG1_MOUSE	Dystroglycan (Dystrophin-associated glycoprotein 1) [Cleaved into: Alpha-dystroglycan (Alpha-DG); Beta-dystroglycan (Beta-DG)]	Dag1 Dag-1	1	18	18	18	318.27	342	210970000	8.32422	10548000000	10.0232	1961700000	1770400000	1334300000	435830000	836560000	347690000	292570000	380120000	304730000	686790000	773170000	1424600000	342	5851500	7602400	6094600	13736000	15463000	28491000	39235000	35408000	26686000	8716600	16731000	6953900	12635000	13551000	12940000	23946000	24130000	29632000	48226000	43389000	39994000	19234000	37262000
Q02053	UBA1_MOUSE	Ubiquitin-like modifier-activating enzyme 1 (EC 6.2.1.45) (Ubiquitin-activating enzyme E1) (Ubiquitin-activating enzyme E1 X) (Ubiquitin-like modifier-activating enzyme 1 X)	Uba1 Sbx Ube1 Ube1ax Ube1x	2	41	41	41	323.31	343	210940000	8.32416	13922000000	10.1437	966850000	898140000	861250000	728310000	570430000	468070000	1494900000	1511700000	1380100000	1602100000	1718700000	1717400000	343	22649000	22905000	20910000	24274000	26040000	26022000	14649000	13608000	13049000	11035000	8642800	7092000	48255000	46270000	46106000	46870000	43247000	39331000	30386000	27397000	31631000	31564000	29259000
Q9WUU7	CATZ_MOUSE	Cathepsin Z (EC 3.4.18.1)	Ctsz	1	12	12	12	145.93	344	210520000	8.32329	3157800000	9.49938	421220000	330490000	326490000	68064000	154610000	50446000	289500000	373990000	320310000	134830000	261650000	426250000	344	19300000	24933000	21354000	8988900	17443000	28417000	28081000	22033000	21766000	4537600	10307000	3363100	9555900	12508000	10295000	4883900	7336700	9423200	12048000	8807900	10176000	3573900	6853300
Q9DCT8	CRIP2_MOUSE	Cysteine-rich protein 2 (CRP-2) (Heart LIM protein)	Crip2 Crp2 Hlp	1	4	4	4	154.82	345	209420000	8.32102	3141300000	9.49711	234630000	231800000	231200000	160430000	173130000	103630000	324750000	300850000	239000000	429460000	310140000	402230000	345	21650000	20057000	15933000	28630000	20676000	26816000	15642000	15453000	15413000	10695000	11542000	6908900	10288000	9277500	8515400	11986000	8768000	9355100	6929800	6770900	7408100	7914200	8982000
Q923D2	BLVRB_MOUSE	Flavin reductase (NADPH) (FR) (EC 1.5.1.30) (Biliverdin reductase B) (BVR-B) (EC 1.3.1.24) (Biliverdin-IX beta-reductase) (NADPH-dependent diaphorase) (NADPH-flavin reductase) (FLR)	Blvrb	1	9	9	9	161.76	346	208990000	8.32013	2716900000	9.43407	148900000	195830000	213760000	188330000	106360000	105800000	224150000	260360000	195680000	271460000	342740000	463480000	346	17242000	20028000	15053000	20881000	26365000	35653000	11454000	15064000	16443000	14487000	8181700	8138700	7362100	10270000	7684900	7465500	9202500	10638000	5290700	5873000	6373300	5726500	4712400
P11983	TCPA_MOUSE	T-complex protein 1 subunit alpha (TCP-1-alpha) (CCT-alpha) (Tailless complex polypeptide 1A) (TCP-1-A) (Tailless complex polypeptide 1B) (TCP-1-B)	Tcp1 Cct1 Ccta	1	29	29	29	213.95	347	208800000	8.31973	8143300000	9.9108	688890000	777090000	630810000	568060000	379930000	315350000	735290000	708770000	754420000	688860000	865080000	1028800000	347	18854000	18174000	19344000	17663000	22182000	26379000	17664000	19925000	16175000	14566000	9741700	8086000	24464000	23077000	26109000	22675000	24819000	23955000	20613000	22428000	20770000	23173000	17956000
P15864	H12_MOUSE	Histone H1.2 (H1 VAR.1) (H1c)	Hist1h1c H1f2	2	9	9	2	42.278	348	208640000	8.3194	2921000000	9.46553	267930000	289590000	273340000	388680000	411330000	96551000	191160000	224130000	197780000	140260000	187270000	249280000	348	13654000	16009000	14127000	10018000	13376000	17805000	19138000	20685000	19525000	27763000	29381000	6896500	5873500	6826700	6691300	6250100	4549400	5323600	7893500	7728000	7190900	20578000	15334000
P05201	AATC_MOUSE	Aspartate aminotransferase, cytoplasmic (cAspAT) (EC 2.6.1.1) (EC 2.6.1.3) (Cysteine aminotransferase, cytoplasmic) (Cysteine transaminase, cytoplasmic) (cCAT) (Glutamate oxaloacetate transaminase 1) (Transaminase A)	Got1	1	19	19	19	148.48	349	207540000	8.3171	6433700000	9.80846	592350000	540320000	541340000	198300000	300940000	126180000	435150000	459950000	373920000	715710000	891890000	1256800000	349	14037000	14837000	12062000	23087000	28771000	40541000	19108000	17430000	17462000	6396900	9707700	4070200	14050000	14917000	13866000	23310000	22214000	26344000	16862000	15933000	17498000	10144000	14892000
Q60715	P4HA1_MOUSE	Prolyl 4-hydroxylase subunit alpha-1 (4-PH alpha-1) (EC 1.14.11.2) (Procollagen-proline,2-oxoglutarate-4-dioxygenase subunit alpha-1)	P4ha1	1	29	29	29	323.31	350	206280000	8.31446	7013700000	9.84595	464730000	338160000	300760000	1627400000	1007500000	884010000	177480000	254960000	219480000	506140000	587120000	645920000	350	5220000	7498900	6455300	14887000	17268000	18998000	13669000	9945800	8845900	47864000	29633000	26000000	10458000	10243000	10062000	20304000	19931000	16999000	15589000	14766000	16535000	61142000	43181000
Q8BTM8	FLNA_MOUSE	Filamin-A (FLN-A) (Actin-binding protein 280) (ABP-280) (Alpha-filamin) (Endothelial actin-binding protein) (Filamin-1) (Non-muscle filamin)	Flna Fln Fln1	1	109	101	99	323.31	351	206180000	8.31425	32783000000	10.5156	2922500000	2623200000	2816200000	1266100000	1166700000	953010000	3735100000	3606400000	3584300000	2924700000	3431200000	3753200000	351	23491000	22682000	22543000	18394000	21580000	23605000	18380000	16498000	17712000	7963200	7337800	5993800	109860000	102780000	114100000	101430000	95905000	88725000	84948000	79676000	86518000	63944000	64910000
P60766	CDC42_MOUSE	Cell division control protein 42 homolog (G25K GTP-binding protein)	Cdc42	4	7	6	6	32.305	352	204290000	8.31025	2042900000	9.31025	178120000	154530000	165800000	135030000	103900000	72862000	147060000	158810000	130510000	259350000	229020000	307920000	352	14706000	15881000	13051000	25935000	22902000	30792000	17812000	15453000	16580000	13503000	10390000	7286200	5167500	5930300	4956000	7394800	7172300	7239700	4971200	4773600	5437100	4447900	3946000
Q6ZWU9	RS27_MOUSE	40S ribosomal protein S27	Rps27	1	5	5	3	43.838	353	203820000	8.30925	1222900000	9.08739	81333000	76356000	83641000	68428000	44790000	30980000	146660000	181970000	124590000	146480000	120740000	116960000	353	24443000	30329000	20765000	24414000	20123000	19494000	13555000	12726000	13940000	11405000	7465000	5163300	6197300	7550500	5680900	2978100	2490700	3086100	2833800	2647600	3182000	1790700	1232600
P48428	TBCA_MOUSE	Tubulin-specific chaperone A (TCP1-chaperonin cofactor A) (Tubulin-folding cofactor A) (CFA)	Tbca	1	14	14	14	133.33	354	203620000	8.30882	2036200000	9.30882	91568000	116760000	102470000	70632000	74115000	47183000	244410000	286170000	180660000	164290000	323680000	333260000	354	24441000	28617000	18066000	16429000	32368000	33326000	9156800	11676000	10247000	7063200	7411500	4718300	7422700	7982400	6312300	5590000	6177300	6675800	4054300	4510100	4646900	3204400	4178100
P18242	CATD_MOUSE	Cathepsin D (EC 3.4.23.5)	Ctsd	1	15	15	15	146.58	355	202980000	8.30745	4871500000	9.68766	395130000	386110000	306240000	293340000	747110000	293950000	370700000	396930000	416130000	290470000	351270000	615990000	355	15446000	16539000	17339000	12103000	14636000	25666000	16464000	16088000	12760000	12222000	31130000	12248000	13321000	12836000	15347000	6793300	10869000	14328000	10736000	10586000	9974200	12045000	33491000
P83940	ELOC_MOUSE	Elongin-C (EloC) (Elongin 15 kDa subunit) (RNA polymerase II transcription factor SIII subunit C) (SIII p15) (Stromal membrane-associated protein SMAP1B homolog) (Transcription elongation factor B polypeptide 1)	Eloc Tceb1	1	6	6	6	151.03	356	202400000	8.30621	1619200000	9.2093	82360000	89016000	75121000	100230000	115010000	76069000	173560000	138980000	163000000	235370000	236510000	133980000	356	21695000	17372000	20375000	29421000	29563000	16748000	10295000	11127000	9390200	12529000	14376000	9508600	4682800	4595800	4757000	5220200	5857300	5199700	3824600	4119200	3762600	3870100	4863200
P21107	TPM3_MOUSE	Tropomyosin alpha-3 chain (Gamma-tropomyosin) (Tropomyosin-3)	Tpm3 Tpm-5 Tpm5	1	21	10	10	60.996	357	202000000	8.30535	6060000000	9.78247	599960000	376020000	551900000	244220000	315330000	292970000	503190000	481870000	440220000	587380000	697490000	929260000	357	16773000	16062000	14674000	19579000	23250000	30975000	19999000	12534000	18397000	8140600	10511000	9765500	14437000	14936000	15139000	17813000	15839000	14719000	12187000	12298000	14436000	15205000	20854000
Q9CY58	PAIRB_MOUSE	Plasminogen activator inhibitor 1 RNA-binding protein (PAI1 RNA-binding protein 1) (PAI-RBP1) (SERPINE1 mRNA-binding protein 1)	Serbp1 Pairbp1	1	18	18	18	102.98	358	201650000	8.3046	5444500000	9.73596	403420000	357340000	421540000	272090000	163330000	120640000	746860000	777620000	686060000	434490000	571990000	489120000	358	27662000	28801000	25410000	16092000	21185000	18116000	14941000	13235000	15612000	10077000	6049400	4468100	22919000	21358000	20483000	16163000	14470000	12325000	11482000	11042000	11757000	13356000	8814000
P62307	RUXF_MOUSE	Small nuclear ribonucleoprotein F (snRNP-F) (Sm protein F) (Sm-F) (SmF)	Snrpf	1	5	5	5	39.068	359	200580000	8.30229	1203500000	9.08045	144310000	67360000	107140000	85412000	58451000	52155000	110430000	61734000	119820000	63888000	137600000	195170000	359	18404000	10289000	19971000	10648000	22933000	32529000	24051000	11227000	17856000	14235000	9741800	8692400	3837000	2067000	3420800	1558700	3289400	3706900	3841800	1543000	3205200	3952000	2249000
Q9D8E6	RL4_MOUSE	60S ribosomal protein L4	Rpl4	1	24	24	24	139.16	360	200320000	8.30172	6610500000	9.82023	378900000	344030000	366730000	297600000	159050000	114040000	1289100000	1264300000	1125500000	419550000	457080000	393610000	360	39063000	38311000	34106000	12714000	13851000	11928000	11482000	10425000	11113000	9018200	4819500	3455600	39017000	35460000	38218000	12695000	13256000	10065000	13369000	11096000	14196000	12199000	8335100
Q99JY9	ARP3_MOUSE	Actin-related protein 3 (Actin-like protein 3)	Actr3 Arp3	2	21	21	21	209.73	361	199920000	8.30086	4798100000	9.68107	373000000	346090000	365640000	354240000	319140000	224350000	348830000	334850000	289490000	444750000	593420000	804320000	361	14535000	13952000	12062000	18531000	24726000	33514000	15542000	14420000	15235000	14760000	13297000	9347900	12377000	13006000	11112000	15617000	14072000	14525000	12258000	12442000	14802000	12974000	13221000
Q9CR51	VATG1_MOUSE	V-type proton ATPase subunit G 1 (V-ATPase subunit G 1) (V-ATPase 13 kDa subunit 1) (Vacuolar proton pump subunit G 1)	Atp6v1g1 Atp6g1	1	5	5	5	236.11	362	198840000	8.2985	1391900000	9.14361	116190000	112130000	67353000	180920000	70038000	86713000	70135000	88277000	62473000	176580000	176830000	184250000	362	10019000	12611000	8924700	25226000	25261000	26321000	16599000	16019000	9621900	25846000	10005000	12388000	3468700	2931100	4113600	5988300	5333200	4240900	2732800	3551300	3457600	4585200	3711600
Q6ZWV7	RL35_MOUSE	60S ribosomal protein L35	Rpl35	1	4	4	4	19.908	363	198650000	8.29809	1390600000	9.1432	119210000	106570000	126350000	34055000	28589000	23013000	206520000	201880000	185770000	111110000	106860000	140640000	363	29502000	28839000	26538000	15873000	15266000	20092000	17031000	15225000	18050000	4865000	4084200	3287600	7087800	5823000	6859600	4254200	2974800	3212600	2879200	2897500	3465600	1969700	1330400
Q62446	FKBP3_MOUSE	Peptidyl-prolyl cis-trans isomerase FKBP3 (PPIase FKBP3) (EC 5.2.1.8) (25 kDa FK506-binding protein) (25 kDa FKBP) (FKBP-25) (FK506-binding protein 3) (FKBP-3) (Immunophilin FKBP25) (Rapamycin-selective 25 kDa immunophilin) (Rotamase)	Fkbp3 Fkbp25	1	12	12	12	111.52	364	197200000	8.29491	3746900000	9.57367	345570000	307900000	367130000	249950000	224770000	128330000	250180000	223810000	206970000	469780000	450560000	521940000	364	13168000	11779000	10893000	24725000	23714000	27471000	18188000	16205000	19323000	13155000	11830000	6754100	7330500	8070500	6679800	13444000	11961000	13270000	11309000	10616000	11722000	10204000	9544400
O35381	AN32A_MOUSE	Acidic leucine-rich nuclear phosphoprotein 32 family member A (Acidic nuclear phosphoprotein pp32) (Leucine-rich acidic nuclear protein) (LANP) (Potent heat-stable protein phosphatase 2A inhibitor I1PP2A)	Anp32a Anp32 Lanp	2	11	11	9	32.715	365	196500000	8.29336	3144000000	9.49748	231630000	172410000	133170000	470170000	361690000	290270000	138610000	41151000	184500000	542310000	371430000	201770000	365	8663300	2571900	11531000	33894000	23215000	12610000	14477000	10776000	8323400	29385000	22606000	18142000	6515800	5355500	9563900	11246000	9934200	9167000	9521000	7470200	9077700	15741000	13436000
P12382	PFKAL_MOUSE	ATP-dependent 6-phosphofructokinase, liver type (ATP-PFK) (PFK-L) (EC 2.7.1.11) (6-phosphofructokinase type B) (Phosphofructo-1-kinase isozyme B) (PFK-B) (Phosphohexokinase)	Pfkl Pfk-l Pfkb	1	28	28	23	323.31	366	194180000	8.2882	8932200000	9.95096	974100000	1101200000	963820000	998430000	662090000	637620000	96521000	109530000	93313000	1005800000	1240400000	1048000000	366	2098300	2381100	2028500	21865000	26964000	22783000	21176000	23939000	20953000	21705000	14393000	13861000	5987200	5723200	4935100	30827000	34344000	25421000	28155000	31579000	31056000	39860000	29469000
P62627	DLRB1_MOUSE	Dynein light chain roadblock-type 1 (Dynein light chain 2A, cytoplasmic)	Dynlrb1 Dncl2a Dnlc2a	1	5	5	5	27.424	367	193880000	8.28753	1357100000	9.13261	140200000	125950000	110240000	80552000	55914000	36802000	118780000	135060000	103960000	95223000	146130000	208330000	367	16968000	19294000	14851000	13603000	20875000	29762000	20028000	17993000	15749000	11507000	7987700	5257400	3858600	3969300	3208700	3011600	3879300	3966700	3147500	3721400	4090600	3852000	2796800
Q64674	SPEE_MOUSE	Spermidine synthase (SPDSY) (EC 2.5.1.16) (Putrescine aminopropyltransferase)	Srm	1	19	19	19	323.31	368	193790000	8.28733	3682100000	9.5661	190320000	216440000	220140000	138940000	147130000	108200000	485790000	495570000	386570000	322480000	400870000	569610000	368	25568000	26083000	20346000	16973000	21098000	29979000	10017000	11392000	11586000	7312800	7743900	5694600	13904000	14019000	11838000	10068000	11701000	12179000	6725400	7343800	7741800	7352900	7994200
P21180	CO2_MOUSE	Complement C2 (EC 3.4.21.43) (C3/C5 convertase) [Cleaved into: Complement C2b fragment; Complement C2a fragment]	C2	1	35	35	35	323.31	369	191930000	8.28314	9020900000	9.95525	1280700000	1552000000	1104200000	871630000	924180000	330280000	101580000	99673000	85624000	615760000	774990000	1280300000	369	2161200	2120700	1821800	13101000	16489000	27239000	27250000	33021000	23494000	18545000	19663000	7027200	5244200	5552100	5991600	19180000	22627000	26363000	34173000	41335000	32641000	38143000	37667000
O08795	GLU2B_MOUSE	Glucosidase 2 subunit beta (80K-H protein) (Glucosidase II subunit beta) (Protein kinase C substrate 60.1 kDa protein heavy chain) (PKCSH)	Prkcsh	1	15	15	15	224.31	370	190900000	8.28081	4963400000	9.69578	346850000	304520000	340380000	775230000	714810000	475950000	269960000	280320000	298270000	317110000	410800000	429190000	370	10383000	10781000	11472000	12197000	15800000	16507000	13340000	11712000	13092000	29817000	27493000	18306000	8669100	9251200	10633000	11420000	11513000	13152000	11797000	11163000	13549000	30881000	30810000
P54227	STMN1_MOUSE	Stathmin (Leukemia-associated gene protein) (Leukemia-associated phosphoprotein p18) (Metablastin) (Oncoprotein 18) (Op18) (Phosphoprotein p19) (pp19) (Prosolin) (Protein Pr22) (pp17)	Stmn1 Lag Lap18 Pr22	1	6	6	4	73.951	371	190760000	8.28049	2670600000	9.42661	187190000	204490000	189400000	113480000	60803000	42464000	329120000	304470000	306790000	310400000	290090000	331910000	371	23509000	21748000	21914000	22172000	20720000	23708000	13370000	14606000	13528000	8106000	4343100	3033100	10161000	9524900	10147000	8573000	7451000	7819500	6135600	6126900	6493300	4432700	5292100
P01899	HA11_MOUSE	H-2 class I histocompatibility antigen, D-B alpha chain (H-2D(B))	H2-D1	6	5	3	2	51.471	372	190600000	8.28012	4764900000	9.67805	771790000	864370000	672560000	525000000	234210000	159720000	120100000	136570000	131140000	269650000	331180000	545190000	372	4804100	5462700	5245700	10786000	13247000	21808000	30871000	34575000	26902000	21000000	9368300	6388900	3990400	4338600	4549400	6850600	10151000	12489000	20904000	23436000	19249000	24211000	11876000
P62267	RS23_MOUSE	40S ribosomal protein S23	Rps23	1	8	8	8	45.347	373	187630000	8.2733	1688600000	9.22753	82262000	89419000	93278000	182250000	90750000	42694000	229240000	208160000	223440000	237520000	93670000	115810000	373	25471000	23129000	24827000	26391000	10408000	12868000	9140300	9935400	10364000	20249000	10083000	4743800	8627000	9048500	7787900	5298200	3099900	3538100	3725600	4205200	4568900	4390900	2362600
P17095	HMGA1_MOUSE	High mobility group protein HMG-I/HMG-Y (HMG-I(Y)) (High mobility group AT-hook protein 1) (High mobility group protein A1)	Hmga1 Hmgi Hmgiy	1	4	4	4	25.384	374	186220000	8.27003	1303500000	9.11511	126170000	163180000	74594000	136510000	160720000	80850000	32132000	36173000	72701000	126310000	163250000	130950000	374	4590300	5167600	10386000	18044000	23321000	18707000	18024000	23312000	10656000	19502000	22960000	11550000	2123700	1629400	2031100	4207400	4358600	3260000	3018400	3591100	3092100	5959700	6911400
P27659	RL3_MOUSE	60S ribosomal protein L3 (J1 protein)	Rpl3	1	19	19	19	161.05	375	183810000	8.26437	5514400000	9.7415	269490000	275030000	210650000	230560000	108640000	93549000	1139600000	1016400000	1163400000	256350000	395620000	355170000	375	37986000	33879000	38779000	8545100	13187000	11839000	8983100	9167800	7021800	7685400	3621300	3118300	31072000	30601000	32950000	10288000	10776000	9310100	9966100	9966900	11457000	10115000	6630100
P61255	RL26_MOUSE	60S ribosomal protein L26 (Silica-induced gene 20 protein) (SIG-20)	Rpl26	1	9	9	9	31.581	376	183510000	8.26366	2018600000	9.30505	182350000	148080000	130590000	71160000	56602000	35715000	341930000	339100000	284030000	127680000	137470000	161390000	376	31084000	30827000	25821000	11607000	12497000	14672000	16577000	13462000	11872000	6469100	5145700	3246800	9758700	9303500	8757400	4071900	3460600	3513400	4048500	3319900	3851300	2109800	2234500
O08543	EFNA5_MOUSE	Ephrin-A5 (AL-1) (EPH-related receptor tyrosine kinase ligand 7) (LERK-7)	Efna5 Epl7 Eplg7 Lerk7	1	7	7	7	88.531	377	182900000	8.26221	2743500000	9.4383	403530000	410850000	330100000	173800000	225320000	98871000	121990000	183740000	150700000	133440000	190850000	320280000	377	8133000	12249000	10046000	8895800	12723000	21352000	26902000	27390000	22007000	11587000	15022000	6591400	2983600	4119000	3994900	3567100	4502500	6414500	8445700	8607800	7772200	6129600	7529200
Q6ZWX6	IF2A_MOUSE	Eukaryotic translation initiation factor 2 subunit 1 (Eukaryotic translation initiation factor 2 subunit alpha) (eIF-2-alpha) (eIF-2A) (eIF-2alpha)	Eif2s1 Eif2a	1	21	21	21	217.18	378	182500000	8.26126	4197600000	9.623	325600000	326770000	387100000	230070000	145790000	138430000	402380000	428250000	393910000	389400000	486850000	542990000	378	17495000	18620000	17126000	16930000	21168000	23608000	14157000	14208000	16831000	10003000	6338800	6018700	12987000	14777000	13911000	9860000	13873000	12125000	10049000	9692300	11787000	8879600	9748100
Q3U0V1	FUBP2_MOUSE	Far upstream element-binding protein 2 (FUSE-binding protein 2) (KH type-splicing regulatory protein) (KSRP)	Khsrp Fubp2	1	31	31	29	323.31	379	181230000	8.25823	7611600000	9.88148	814070000	716130000	656120000	480070000	478980000	388600000	599840000	548290000	534430000	652650000	731160000	1011300000	379	14282000	13055000	12725000	15539000	17409000	24078000	19383000	17051000	15622000	11430000	11404000	9252400	20020000	19359000	20504000	22345000	21217000	21142000	21020000	19064000	20774000	21128000	22793000
Q64449	MRC2_MOUSE	C-type mannose receptor 2 (Lectin lambda) (Macrophage mannose receptor 2) (CD antigen CD280)	Mrc2 Kiaa0709	1	45	45	45	323.31	380	180400000	8.25624	13891000000	10.1427	1778200000	2035200000	1256800000	3152200000	1589800000	754050000	236520000	209000000	264080000	691910000	771660000	1151200000	380	3071700	2714300	3429600	8985800	10021000	14950000	23093000	26431000	16322000	40938000	20647000	9792800	11722000	11494000	12107000	24010000	24135000	31137000	49629000	59016000	42612000	123840000	74362000
O89051	ITM2B_MOUSE	Integral membrane protein 2B (Immature BRI2) (imBRI2) (Protein E25B) (Transmembrane protein BRI) (Bri) [Cleaved into: BRI2, membrane form (Mature BRI2) (mBRI2); BRI2 intracellular domain (BRI2 ICD); BRI2C, soluble form; Bri23 peptide (Bri2-23) (ABri23) (C-terminal peptide) (P23 peptide)]	Itm2b	1	9	9	9	56.569	381	179010000	8.25288	2864100000	9.45699	410420000	449290000	307730000	98462000	314920000	137380000	44087000	49039000	91517000	242740000	277620000	440890000	381	2755500	3064900	5719800	15171000	17351000	27556000	25651000	28081000	19233000	6153900	19682000	8586200	2970400	3212900	4445500	6721400	7633700	9083700	8637200	9771300	7897700	5948700	15493000
Q61112	CAB45_MOUSE	45 kDa calcium-binding protein (Cab45) (Stromal cell-derived factor 4) (SDF-4)	Sdf4 Cab45	1	18	18	18	158.83	382	178580000	8.25183	4285800000	9.63203	515100000	484720000	379680000	786310000	336050000	192830000	115450000	159810000	157030000	195120000	424270000	539340000	382	4810500	6658800	6543100	8130000	17678000	22472000	21462000	20196000	15820000	32763000	14002000	8034500	5672200	4833300	6144000	5719100	10014000	11821000	13498000	12865000	11277000	27633000	18021000
P08122	CO4A2_MOUSE	Collagen alpha-2(IV) chain [Cleaved into: Canstatin]	Col4a2	1	27	27	27	323.31	383	177430000	8.24903	17920000000	10.2533	1387100000	1408400000	1145700000	545180000	603860000	344030000	2271200000	2415800000	2310200000	1338100000	1701600000	2449300000	383	22487000	23919000	22873000	13248000	16847000	24251000	13733000	13945000	11343000	5397800	5978800	3406200	55835000	54186000	60963000	35197000	35825000	49014000	59143000	58425000	50363000	25112000	30733000
Q6ZWV3	RL10_MOUSE	60S ribosomal protein L10 (Protein QM homolog) (Ribosomal protein L10)	Rpl10 Qm	2	9	9	9	72.404	384	177340000	8.24881	3192100000	9.50408	240050000	183280000	197720000	114350000	80885000	55637000	564100000	548110000	557150000	169100000	222450000	259230000	384	31339000	30451000	30953000	9394600	12358000	14402000	13336000	10182000	10985000	6352600	4493600	3090900	17318000	18423000	18411000	5203500	6093600	5970400	6490500	6411400	7212900	4736100	3814100
Q9WVJ3	CBPQ_MOUSE	Carboxypeptidase Q (EC 3.4.17.-) (Hematopoietic lineage switch 2) (Plasma glutamate carboxypeptidase)	Cpq Hls2 Pgcp	1	12	12	12	279.46	385	176880000	8.24768	4598900000	9.66265	646060000	767940000	634110000	344600000	318360000	297650000	84602000	75471000	70443000	193120000	441400000	725120000	385	3253900	2902700	2709400	7427500	16977000	27889000	24848000	29536000	24389000	13254000	12245000	11448000	3723900	3562400	4020500	8068100	12722000	14801000	15492000	19227000	16768000	15471000	15729000
Q9CWJ9	PUR9_MOUSE	Bifunctional purine biosynthesis protein PURH [Includes: Phosphoribosylaminoimidazolecarboxamide formyltransferase (EC 2.1.2.3) (5-aminoimidazole-4-carboxamide ribonucleotide formyltransferase) (AICAR transformylase); IMP cyclohydrolase (EC 3.5.4.10) (ATIC) (IMP synthase) (Inosinicase)]	Atic Purh	1	32	32	32	323.31	386	176840000	8.24758	7427100000	9.87082	548290000	470060000	598110000	368990000	291290000	187570000	903500000	813260000	774490000	658730000	733970000	1078900000	386	21512000	19363000	18440000	15684000	17476000	25687000	13054000	11192000	14241000	8785500	6935400	4466000	27489000	26719000	25077000	20707000	22629000	23976000	17507000	15530000	20251000	14882000	12776000
Q01721	GAS1_MOUSE	Growth arrest-specific protein 1 (GAS-1)	Gas1 Gas-1	1	11	11	11	100.9	387	176240000	8.2461	3701100000	9.56833	379600000	530900000	511230000	198590000	412740000	152610000	77328000	127950000	102510000	232280000	304760000	670640000	387	3682300	6092800	4881200	11061000	14513000	31935000	18076000	25281000	24344000	9456800	19654000	7267300	3332400	4583700	3873000	10211000	9478000	12634000	11778000	12242000	13243000	11555000	18101000
Q9R0E1	PLOD3_MOUSE	Multifunctional procollagen lysine hydroxylase and glycosyltransferase LH3 [Includes: Procollagen-lysine,2-oxoglutarate 5-dioxygenase 3 (EC 1.14.11.4) (Lysyl hydroxylase 3) (LH3); Procollagen glycosyltransferase (EC 2.4.1.50) (EC 2.4.1.66) (Galactosylhydroxylysine-glucosyltransferase) (Procollagen galactosyltransferase) (Procollagen glucosyltransferase)]	Plod3	1	29	27	27	278.38	388	174710000	8.24232	8385900000	9.92355	810300000	1184000000	835790000	1047200000	701460000	379340000	271980000	399500000	405130000	538750000	744330000	1068100000	388	5666400	8323000	8440100	11224000	15507000	22252000	16881000	24667000	17412000	21816000	14614000	7902900	13030000	13425000	15299000	18047000	19160000	23076000	24172000	29192000	24107000	44651000	31725000
P62717	RL18A_MOUSE	60S ribosomal protein L18a	Rpl18a	1	7	7	7	34.775	389	173940000	8.2404	2609100000	9.41649	182740000	59942000	111500000	80410000	45118000	59472000	570750000	362370000	541380000	188420000	196180000	210850000	389	38050000	24158000	36092000	12562000	13079000	14056000	12183000	3996200	7433600	5360700	3007900	3964800	15332000	14734000	14980000	5659500	4997400	4312600	4941300	4492700	4178000	4919600	3243500
Q62093	SRSF2_MOUSE	Serine/arginine-rich splicing factor 2 (Protein PR264) (Putative myelin regulatory factor 1) (MRF-1) (Splicing component, 35 kDa) (Splicing factor SC35) (SC-35) (Splicing factor, arginine/serine-rich 2)	Srsf2 Pr264 Sfrs10 Sfrs2	1	4	4	4	164.85	390	173430000	8.23912	2428000000	9.38525	204580000	238830000	219060000	139550000	148430000	88632000	206030000	178660000	254610000	267570000	218310000	263730000	390	14716000	12761000	18186000	19112000	15594000	18838000	14613000	17059000	15647000	9968000	10602000	6330900	6787200	5855600	7753500	6538500	6082800	6079500	5694100	6672000	6665300	7406900	8078800
P48036	ANXA5_MOUSE	Annexin A5 (Anchorin CII) (Annexin V) (Annexin-5) (Calphobindin I) (CBP-I) (Endonexin II) (Lipocortin V) (Placental anticoagulant protein 4) (PP4) (Placental anticoagulant protein I) (PAP-I) (Thromboplastin inhibitor) (Vascular anticoagulant-alpha) (VAC-alpha)	Anxa5 Anx5	1	19	19	19	323.31	391	173150000	8.23842	4848200000	9.68558	530490000	745430000	512090000	382960000	274040000	163620000	177370000	236490000	234870000	408560000	505340000	676640000	391	6334700	8446100	8388100	14591000	18048000	24166000	18946000	26622000	18289000	13677000	9787200	5843700	6051200	8924600	8142100	14714000	13407000	15947000	14288000	21849000	17014000	15532000	12345000
Q61792	LASP1_MOUSE	LIM and SH3 domain protein 1 (LASP-1) (Metastatic lymph node gene 50 protein) (MLN 50)	Lasp1 Mln50	2	15	15	15	131.65	392	172940000	8.2379	2939900000	9.46833	216740000	167710000	97235000	279330000	261910000	219820000	193450000	178540000	199520000	421250000	305540000	398880000	392	11380000	10502000	11737000	24779000	17973000	23463000	12749000	9865500	5719700	16431000	15407000	12931000	8045000	8515900	7386200	9987700	8002400	11870000	9044400	5421800	5003000	9702000	10041000
P45377	ALD2_MOUSE	Aldose reductase-related protein 2 (AR) (EC 1.1.1.21) (Aldehyde reductase) (Fibroblast growth factor-regulated protein) (Protein FR-1)	Akr1b8 Fgfrp	1	13	13	9	92.317	393	170640000	8.23208	4436600000	9.64705	366220000	289920000	178470000	278700000	223340000	184720000	394650000	397390000	325630000	523830000	536450000	737260000	393	15179000	15284000	12524000	20147000	20633000	28356000	14085000	11151000	6864300	10719000	8590100	7104400	10932000	10057000	10280000	16167000	14039000	15232000	9679800	8907000	7868000	9994200	8730800
P99029	PRDX5_MOUSE	Peroxiredoxin-5, mitochondrial (EC 1.11.1.15) (Antioxidant enzyme B166) (AOEB166) (Liver tissue 2D-page spot 2D-0014IV) (PLP) (Peroxiredoxin V) (Prx-V) (Peroxisomal antioxidant enzyme) (Thioredoxin peroxidase PMP20)	Prdx5 Prdx6	1	10	10	10	34.258	394	169780000	8.22989	2716500000	9.43401	221020000	261590000	273040000	329450000	288270000	212340000	92981000	97077000	79644000	252120000	272300000	336700000	394	5811300	6067300	4977800	15757000	17019000	21044000	13814000	16350000	17065000	20590000	18017000	13271000	3447800	3874700	2863500	9900800	8684000	8307600	6752400	7599600	8491600	13705000	11841000
P60335	PCBP1_MOUSE	Poly(rC)-binding protein 1 (Alpha-CP1) (Heterogeneous nuclear ribonucleoprotein E1) (hnRNP E1)	Pcbp1	1	13	13	10	188.27	395	169720000	8.22973	4073400000	9.60996	294150000	193670000	271720000	230400000	182880000	158580000	449180000	407840000	484270000	414390000	447700000	535980000	395	18716000	16993000	20178000	17266000	18654000	22333000	12256000	8069500	11321000	9600100	7619800	6607300	12926000	12717000	14138000	13016000	12634000	13594000	9212100	8214800	10038000	10084000	8127600
Q7TPR4	ACTN1_MOUSE	Alpha-actinin-1 (Alpha-actinin cytoskeletal isoform) (F-actin cross-linking protein) (Non-muscle alpha-actinin-1)	Actn1	1	50	35	31	323.31	396	169040000	8.22799	10818000000	10.0341	1108000000	948460000	805040000	691160000	577620000	434270000	907360000	933000000	822960000	854750000	1283200000	1449700000	396	14178000	14578000	12859000	13355000	20050000	22651000	17312000	14820000	12579000	10799000	9025300	6785400	32269000	30194000	28491000	24674000	31279000	30290000	30242000	28834000	28936000	25384000	30909000
P61161	ARP2_MOUSE	Actin-related protein 2 (Actin-like protein 2)	Actr2 Arp2	1	16	16	16	205.94	397	169000000	8.22789	4225100000	9.62584	392430000	295080000	303980000	300220000	277950000	213790000	335980000	287930000	309590000	354950000	532650000	595110000	397	13439000	11517000	12383000	14198000	21306000	23804000	15697000	11803000	12159000	12009000	11118000	8551600	10791000	9801400	10026000	10866000	12051000	11862000	10814000	10086000	10499000	11792000	11263000
P99025	GFRP_MOUSE	GTP cyclohydrolase 1 feedback regulatory protein (GFRP) (GTP cyclohydrolase I feedback regulatory protein) (p35)	Gchfr Gfrp	1	5	5	5	36.998	398	168500000	8.2266	842520000	8.92558	98436000	83807000	64661000	50140000	58664000	31359000	61749000	71186000	9445800	26425000	106080000	180570000	398	12350000	14237000	1889200	5284900	21216000	36115000	19687000	16761000	12932000	10028000	11733000	6271800	0	0	0	0	0	3828700	0	2469300	0	0	0
P61971	NTF2_MOUSE	Nuclear transport factor 2 (NTF-2)	Nutf2 Ntf2	1	3	3	3	43.422	399	168440000	8.22645	1347500000	9.12953	31306000	56361000	35969000	76893000	75566000	62357000	67500000	143300000	117000000	179640000	217980000	283680000	399	8437500	17912000	14625000	22455000	27247000	35459000	3913200	7045100	4496100	9611600	9445800	7794700	4423400	4043500	3959800	4864200	5597400	4385600	0	3019700	0	3907700	3555900
O88207	CO5A1_MOUSE	Collagen alpha-1(V) chain	Col5a1	2	26	26	26	323.31	400	167030000	8.22279	17037000000	10.2314	2384100000	2483800000	1927300000	1231500000	1026500000	629760000	940340000	1015800000	982720000	1065300000	1418900000	1923900000	400	9219000	9958400	9634500	10444000	13910000	18862000	23373000	24351000	18895000	12073000	10064000	6174100	28623000	31509000	33254000	33481000	42879000	45126000	66558000	66809000	53561000	54404000	47143000
Q9D7S7	RL22L_MOUSE	60S ribosomal protein L22-like 1	Rpl22l1	1	2	2	2	39.071	401	166870000	8.22238	1168100000	9.06748	110340000	109240000	117080000	48411000	41612000	25941000	129340000	126760000	110650000	125320000	118160000	105230000	401	18477000	18108000	15807000	17903000	16880000	15033000	15763000	15606000	16725000	6915800	5944600	3705900	3772900	3939900	3248100	4376100	3372800	2543800	2996000	3160300	3572700	2949400	2198900
Q60692	PSB6_MOUSE	Proteasome subunit beta type-6 (EC 3.4.25.1) (Low molecular mass protein 19) (Macropain delta chain) (Multicatalytic endopeptidase complex delta chain) (Proteasome delta chain) (Proteasome subunit Y)	Psmb6 Lmp19	1	10	10	10	31.838	402	166130000	8.22045	2159700000	9.33439	181260000	203990000	187780000	130360000	162270000	94389000	159750000	148130000	130330000	258740000	206900000	295800000	402	12289000	11395000	10026000	19903000	15915000	22754000	13943000	15691000	14444000	10028000	12482000	7260700	6123800	5587500	5876100	7099800	6677600	7056200	5610200	6261900	6173400	5477300	6151600
P62849	RS24_MOUSE	40S ribosomal protein S24	Rps24	1	3	3	3	13.196	403	165010000	8.21751	1485100000	9.17176	99612000	101240000	103080000	58237000	37307000	24745000	293720000	268040000	230490000	62358000	114340000	91897000	403	32636000	29782000	25610000	6928600	12705000	10211000	11068000	11248000	11453000	6470700	4145200	2749500	10069000	8821100	7626900	1961400	3093400	2657100	2848300	2571100	2967000	2555100	1903300
Q62059	CSPG2_MOUSE	Versican core protein (Chondroitin sulfate proteoglycan core protein 2) (Chondroitin sulfate proteoglycan 2) (Large fibroblast proteoglycan) (PG-M)	Vcan Cspg2	1	43	43	43	323.31	404	164440000	8.21601	24666000000	10.3921	2833900000	2939300000	2588300000	1016700000	3141600000	1508200000	1056700000	1122800000	1057900000	1832200000	2179500000	3388500000	404	7044400	7485500	7052900	12214000	14530000	22590000	18893000	19595000	17255000	6777700	20944000	10054000	31997000	36302000	39317000	56568000	58447000	70727000	74759000	72445000	69764000	44324000	142790000
P53996	CNBP_MOUSE	Cellular nucleic acid-binding protein (CNBP) (Zinc finger protein 9)	Cnbp Cnbp1 Znf9	1	6	6	6	130.57	405	163430000	8.21333	2615000000	9.41747	231780000	200930000	231890000	50304000	79624000	59855000	266630000	257630000	245390000	284070000	284110000	422750000	405	16664000	16102000	15337000	17754000	17757000	26422000	14486000	12558000	14493000	3144000	4976500	3740900	8220000	6616400	7215500	9924300	6151400	9008600	10477000	7262400	7352400	2376100	3765000
Q9CZY3	UB2V1_MOUSE	Ubiquitin-conjugating enzyme E2 variant 1 (UEV-1) (CROC-1)	Ube2v1 Croc1	1	7	7	2	22.144	406	162920000	8.21197	2280800000	9.35809	188070000	203850000	226660000	104010000	87400000	87164000	186000000	182430000	136990000	246400000	257470000	374390000	406	13286000	13031000	9785300	17600000	18391000	26742000	13433000	14561000	16190000	7429600	6242900	6226000	5667700	5687600	5114600	6973300	7551000	8606900	5052200	5284100	6524500	5746800	5499800
Q9CPR4	RL17_MOUSE	60S ribosomal protein L17	Rpl17	1	9	9	9	75.826	407	162730000	8.21147	2441000000	9.38757	158740000	146590000	148200000	94791000	29983000	41925000	442940000	472130000	447510000	87502000	173150000	197530000	407	29529000	31476000	29834000	5833500	11544000	13168000	10583000	9772600	9879900	6319400	1998900	2795000	13743000	14263000	14178000	3030800	5316300	4543000	5182600	4802800	5170700	4084000	2391800
Q05186	RCN1_MOUSE	Reticulocalbin-1	Rcn1 Rca1 Rcn	1	17	17	17	293.66	408	162660000	8.21128	2765200000	9.44173	142140000	200230000	188360000	311030000	288980000	178970000	183360000	189610000	226470000	146320000	292090000	417680000	408	10786000	11153000	13322000	8606900	17182000	24569000	8360900	11778000	11080000	18296000	16999000	10527000	8446900	7679400	8530800	5197300	8120300	8668800	5828500	7530500	7348600	10608000	10945000
O70435	PSA3_MOUSE	Proteasome subunit alpha type-3 (EC 3.4.25.1) (Macropain subunit C8) (Multicatalytic endopeptidase complex subunit C8) (Proteasome component C8) (Proteasome subunit K)	Psma3	1	10	10	10	52.326	409	161910000	8.20927	3238200000	9.5103	260010000	257690000	271390000	258530000	145680000	163530000	182550000	232060000	220520000	366550000	373450000	502760000	409	9127400	11603000	11026000	18327000	18672000	25138000	13000000	12884000	13570000	12927000	7283800	8176400	8382700	7474500	7407800	8375700	10668000	10508000	7649400	7773600	9429200	10609000	8955800
P62918	RL8_MOUSE	60S ribosomal protein L8	Rpl8	1	8	8	8	83.599	410	161660000	8.2086	2748200000	9.43905	148790000	115360000	24788000	157070000	47054000	29347000	632080000	535720000	528620000	160030000	194850000	174320000	410	37181000	31513000	31095000	9413400	11462000	10254000	8752500	6785700	1458100	9239600	2767900	1726300	17459000	17832000	14662000	6070500	5049300	5903200	4811700	4500800	0	6475300	4016700
P81117	NUCB2_MOUSE	Nucleobindin-2 (DNA-binding protein NEFA) (Prepronesfatin) [Cleaved into: Nesfatin-1]	Nucb2 Nefa	1	23	23	23	323.31	411	160930000	8.20664	5149800000	9.71179	607400000	582540000	433410000	724470000	455610000	261970000	260980000	264350000	254570000	289990000	384960000	629570000	411	8155600	8260900	7955400	9062200	12030000	19674000	18981000	18204000	13544000	22640000	14238000	8186600	10090000	9585000	10342000	10183000	11871000	12567000	15417000	14804000	14171000	27776000	20037000
Q8VIJ6	SFPQ_MOUSE	Splicing factor, proline- and glutamine-rich (DNA-binding p52/p100 complex, 100 kDa subunit) (Polypyrimidine tract-binding protein-associated-splicing factor) (PSF) (PTB-associated-splicing factor)	Sfpq Psf	1	23	23	22	271.95	412	159300000	8.20222	6849800000	9.83568	757930000	514480000	555120000	311850000	288100000	223720000	716810000	708340000	739390000	422780000	710520000	900620000	412	16670000	16473000	17195000	9832000	16524000	20945000	17626000	11965000	12910000	7252400	6700000	5202700	20841000	20052000	23274000	15513000	19087000	19081000	21526000	15906000	19592000	14019000	15754000
P47757	CAPZB_MOUSE	F-actin-capping protein subunit beta (CapZ beta)	Capzb Cappb1	1	11	11	11	145.73	413	158970000	8.20132	3338300000	9.52353	329160000	274450000	337410000	231810000	153240000	123490000	249600000	250270000	245990000	307190000	391830000	442130000	413	11886000	11917000	11714000	14628000	18658000	21054000	15674000	13069000	16067000	11038000	7296900	5880400	8569500	7986600	7737000	11315000	10006000	8867100	8475300	7887000	8278800	10241000	8252100
P98064	MASP1_MOUSE	Mannan-binding lectin serine protease 1 (EC 3.4.21.-) (Complement factor MASP-3) (Complement-activating component of Ra-reactive factor) (Mannose-binding lectin-associated serine protease 1) (MASP-1) (Mannose-binding protein-associated serine protease) (Ra-reactive factor serine protease p100) (RaRF) (Serine protease 5) [Cleaved into: Mannan-binding lectin serine protease 1 heavy chain; Mannan-bi…	Masp1 Crarf Masp3	1	16	16	16	126.17	414	158230000	8.19929	6170900000	9.79035	759270000	832700000	616010000	807520000	855040000	493980000	69063000	74990000	82303000	387390000	474250000	717970000	414	1770900	1922800	2110300	9933100	12160000	18410000	19468000	21351000	15795000	20706000	21924000	12666000	3192200	3726100	3430800	14726000	14905000	16979000	22039000	22958000	19954000	34321000	38513000
Q9QZF2	GPC1_MOUSE	Glypican-1 [Cleaved into: Secreted glypican-1]	Gpc1	1	20	20	20	135.01	415	157770000	8.19802	6310800000	9.80008	429490000	374830000	363500000	452210000	366950000	173450000	814040000	1010100000	928120000	313070000	398900000	686140000	415	20351000	25253000	23203000	7826800	9972400	17153000	10737000	9370800	9087500	11305000	9173700	4336300	28634000	31766000	30663000	12130000	11883000	15468000	12368000	12375000	12790000	18092000	16621000
Q93092	TALDO_MOUSE	Transaldolase (EC 2.2.1.2)	Taldo1 Tal Taldo	1	13	13	13	82.635	416	157730000	8.19791	4258600000	9.62927	215630000	259240000	219460000	357630000	282750000	220750000	378160000	356840000	262960000	522920000	537720000	644540000	416	14006000	13216000	9739400	19368000	19916000	23872000	7986400	9601600	8128200	13246000	10472000	8176000	12188000	10802000	11239000	11311000	13431000	14339000	9131900	10354000	10183000	15692000	12608000
P62305	RUXE_MOUSE	Small nuclear ribonucleoprotein E (snRNP-E) (Sm protein E) (Sm-E) (SmE)	Snrpe	1	3	3	3	26.791	417	157730000	8.19791	946390000	8.97607	63231000	100840000	61731000	62124000	42300000	50299000	87273000	83213000	99389000	76281000	83183000	136520000	417	14546000	13869000	16565000	12714000	13864000	22754000	10538000	16807000	10288000	10354000	7050000	8383200	2505900	1902700	2648800	1675400	2469600	2055100	1574100	2405300	1423600	3213100	2212100
Q9CZT5	VASN_MOUSE	Vasorin (Protein slit-like 2)	Vasn Slitl2	1	8	8	8	323.31	418	156650000	8.19493	5169500000	9.71345	706560000	772570000	517840000	462890000	413510000	185420000	148160000	150630000	180590000	413340000	492720000	725290000	418	4489600	4564500	5472400	12525000	14931000	21978000	21411000	23411000	15692000	14027000	12531000	5618900	5166700	6805000	6871600	14193000	13522000	15509000	19950000	18494000	18709000	19447000	19604000
P52927	HMGA2_MOUSE	High mobility group protein HMGI-C (High mobility group AT-hook protein 2)	Hmga2 Hmgic	1	3	3	3	22.897	419	156250000	8.19382	781260000	8.8928	83985000	76980000	74927000	59919000	83516000	15932000	50712000	39722000	56175000	58308000	82740000	98345000	419	10142000	7944300	11235000	11662000	16548000	19669000	16797000	15396000	14985000	11984000	16703000	3186400	1667500	1622000	2158800	2077300	2391700	2083900	2337700	1999600	2395600	2315000	3302100
Q8C1B7	SEP11_MOUSE	Septin-11	Sept11 D5Ertd606e	1	19	19	11	323.31	420	155770000	8.19248	5296000000	9.72395	474040000	485870000	406590000	331920000	259070000	211340000	526620000	436040000	429970000	465990000	609580000	658980000	420	15489000	12825000	12646000	13706000	17929000	19382000	13942000	14290000	11959000	9762500	7619600	6215800	16152000	14775000	15066000	16458000	17612000	15867000	13048000	13500000	14736000	12998000	12358000
P23506	PIMT_MOUSE	Protein-L-isoaspartate(D-aspartate) O-methyltransferase (PIMT) (EC 2.1.1.77) (L-isoaspartyl protein carboxyl methyltransferase) (Protein L-isoaspartyl/D-aspartyl methyltransferase) (Protein-beta-aspartate methyltransferase)	Pcmt1	1	11	11	11	153.72	421	155000000	8.19033	2169900000	9.33644	198510000	172980000	234400000	117330000	113470000	81638000	191970000	160910000	126500000	184100000	173380000	414740000	421	13712000	11493000	9035900	13150000	12384000	29624000	14180000	12356000	16743000	8381000	8105100	5831300	5668000	5408600	4741800	4939600	4716900	7650600	6438100	5724100	7229500	5506400	5246600
Q99K51	PLST_MOUSE	Plastin-3 (T-plastin)	Pls3	3	33	33	33	322.31	422	154850000	8.18991	6968100000	9.84311	581870000	659300000	529100000	406000000	342920000	306520000	616020000	617940000	481600000	623180000	782160000	1021500000	422	13689000	13732000	10702000	13848000	17381000	22700000	12930000	14651000	11758000	9022100	7620500	6811500	19223000	18992000	19080000	19835000	23505000	21331000	17141000	17496000	17543000	17120000	15253000
P05213	TBA1B_MOUSE	Tubulin alpha-1B chain (Alpha-tubulin 2) (Alpha-tubulin isotype M-alpha-2) (Tubulin alpha-2 chain) [Cleaved into: Detyrosinated tubulin alpha-1B chain]	Tuba1b Tuba2	1	26	2	0	72.428	423	154830000	8.18986	3715900000	9.57006	267220000	310210000	270890000	127930000	81787000	82159000	602390000	571100000	455530000	267850000	319790000	359060000	423	25100000	23796000	18980000	11161000	13325000	14961000	11134000	12925000	11287000	5330300	3407800	3423300	19757000	18557000	16234000	9350600	9113900	8037400	7181400	8040700	7853900	5959500	4068400
P80316	TCPE_MOUSE	T-complex protein 1 subunit epsilon (TCP-1-epsilon) (CCT-epsilon)	Cct5 Ccte Kiaa0098	1	30	30	30	203.89	424	154240000	8.1882	6323700000	9.80097	460620000	499600000	426480000	511030000	320840000	301470000	546010000	517120000	497550000	556720000	863260000	822970000	424	13317000	12613000	12135000	13578000	21055000	20072000	11235000	12185000	10402000	12464000	7825400	7352800	16798000	15466000	16339000	16101000	18642000	16524000	16546000	16129000	16791000	18999000	14589000
Q9WV32	ARC1B_MOUSE	Actin-related protein 2/3 complex subunit 1B (Arp2/3 complex 41 kDa subunit) (p41-ARC)	Arpc1b	2	12	12	12	159.8	425	152790000	8.18409	3667000000	9.56431	313300000	236070000	341450000	263700000	256840000	185480000	260330000	276720000	270180000	305610000	410720000	546560000	425	10847000	11530000	11258000	12734000	17113000	22774000	13054000	9836200	14227000	10987000	10702000	7728200	8825900	8925700	9646700	11877000	10574000	10760000	7961300	8247700	9805600	9946700	10525000
Q91Z53	GRHPR_MOUSE	Glyoxylate reductase/hydroxypyruvate reductase (EC 1.1.1.79) (EC 1.1.1.81)	Grhpr Glxr	1	10	10	10	259.57	426	151320000	8.1799	2421100000	9.38401	255850000	240920000	272810000	213960000	160840000	151760000	81628000	84739000	76314000	227410000	274790000	380080000	426	5101800	5296200	4769600	14213000	17174000	23755000	15991000	15057000	17050000	13372000	10053000	9484900	2949600	2986800	3453400	8487800	8636100	8065200	6420000	6778700	7532000	9428100	7908200
Q9JK53	PRELP_MOUSE	Prolargin (Proline-arginine-rich end leucine-rich repeat protein)	Prelp	1	15	15	15	106.63	427	151000000	8.17898	3926100000	9.59396	633550000	613010000	560140000	398380000	281210000	191960000	74867000	88149000	81338000	247050000	322010000	434390000	427	2879500	3390300	3128400	9502100	12385000	16707000	24367000	23577000	21544000	15322000	10816000	7382900	3156300	3526000	3403200	8800900	8595000	10319000	18123000	17444000	16409000	16041000	11954000
Q9EPL2	CSTN1_MOUSE	Calsyntenin-1 (Alcadein-alpha) (Alc-alpha) [Cleaved into: Soluble Alc-alpha (SAlc-alpha); CTF1-alpha (C-terminal fragment 1-alpha)]	Clstn1 Cs1 Cstn1 Kiaa0911	1	30	30	30	323.31	428	150430000	8.17733	7521500000	9.8763	1010900000	985880000	745350000	506010000	493650000	322650000	426300000	438140000	464000000	578070000	580680000	969790000	428	8526100	8762700	9280000	11561000	11614000	19396000	20219000	19718000	14907000	10120000	9873000	6453100	13355000	14623000	15359000	18176000	17475000	21285000	26650000	26576000	25749000	17623000	26523000
Q3UHX2	HAP28_MOUSE	28 kDa heat- and acid-stable phosphoprotein (PDGF-associated protein) (PAP) (PDGFA-associated protein 1) (PAP1)	Pdap1	1	7	7	7	62.38	429	149260000	8.17394	2089600000	9.32006	169930000	200430000	180570000	89271000	124030000	86078000	223100000	202020000	125180000	171880000	176840000	340300000	429	15936000	14430000	8941800	12277000	12631000	24307000	12138000	14316000	12898000	6376500	8859200	6148400	5583400	6147000	5357400	7638900	6083300	6172600	5571500	5105900	5166200	4716600	5866800
P42932	TCPQ_MOUSE	T-complex protein 1 subunit theta (TCP-1-theta) (CCT-theta)	Cct8 Cctq	1	27	27	27	176.6	430	148800000	8.1726	6398300000	9.80606	533020000	543700000	553790000	447090000	294380000	237870000	603800000	553300000	516410000	597650000	749580000	748750000	430	14042000	12867000	12009000	13899000	17432000	17413000	12396000	12644000	12879000	10397000	6846000	5532000	18213000	18057000	18298000	19504000	19776000	18166000	16842000	16059000	20194000	18030000	13596000
Q08093	CNN2_MOUSE	Calponin-2 (Calponin H2, smooth muscle) (Neutral calponin)	Cnn2	1	12	12	11	174.98	431	148070000	8.17047	2813300000	9.44922	312970000	233260000	241500000	147040000	125260000	137160000	270540000	240620000	241420000	221480000	293610000	343690000	431	14239000	12664000	12706000	11657000	15453000	18089000	16472000	12277000	12710000	7739100	6592800	7218700	8250000	7983100	8050500	6322000	8043200	7999700	8024500	7734200	7712400	7274600	6752200
P80317	TCPZ_MOUSE	T-complex protein 1 subunit zeta (TCP-1-zeta) (CCT-zeta-1)	Cct6a Cct6 Cctz Cctz1	2	25	25	25	292.91	432	147610000	8.16912	5313800000	9.72541	384960000	320880000	381530000	442520000	266780000	190270000	475490000	488270000	517000000	592070000	729220000	524860000	432	13208000	13563000	14361000	16446000	20256000	14579000	10693000	8913200	10598000	12292000	7410500	5285200	15419000	13603000	14833000	17544000	16135000	15178000	13619000	13927000	15542000	16914000	12823000
Q9JKR6	HYOU1_MOUSE	Hypoxia up-regulated protein 1 (GRP-170) (140 kDa Ca(2+)-binding protein) (CBP-140)	Hyou1 Grp170	1	36	36	36	323.31	433	147440000	8.16862	9730800000	9.98815	718630000	727800000	573790000	1290900000	1089900000	760960000	713030000	725820000	697400000	608360000	831770000	992540000	433	10803000	10997000	10567000	9217600	12603000	15038000	10888000	11027000	8693700	19559000	16513000	11530000	21769000	24061000	26114000	19978000	23572000	23563000	22303000	22461000	22264000	54959000	49333000
P14115	RL27A_MOUSE	60S ribosomal protein L27a (L29)	Rpl27a	1	6	6	6	20.211	434	147260000	8.16808	1914400000	9.28203	101140000	96222000	111920000	62870000	45788000	25272000	381680000	370160000	352920000	130210000	100190000	136070000	434	29360000	28473000	27147000	10016000	7707100	10467000	7780100	7401700	8609500	4836200	3522200	1944000	11475000	10450000	12123000	5110900	2864500	2718100	2404100	3124800	3369500	3942700	2913000
Q9CR16	PPID_MOUSE	Peptidyl-prolyl cis-trans isomerase D (PPIase D) (EC 5.2.1.8) (40 kDa peptidyl-prolyl cis-trans isomerase) (Cyclophilin-40) (CYP-40) (Rotamase D)	Ppid	1	20	20	20	138.57	435	146730000	8.16652	4255300000	9.62893	331430000	242930000	242720000	126120000	134750000	82644000	553770000	541830000	435070000	380260000	552630000	631120000	435	19096000	18684000	15003000	13112000	19056000	21763000	11429000	8376800	8369800	4349100	4646500	2849800	14353000	14338000	13956000	11788000	13267000	12702000	8640100	7718000	8895000	6369800	6469900
P56395	CYB5_MOUSE	Cytochrome b5	Cyb5a Cyb5	1	5	5	5	26.844	436	146360000	8.16542	1170900000	9.06852	128350000	136060000	126100000	69734000	79900000	61303000	57202000	41924000	63086000	123490000	135730000	148010000	436	7150200	5240500	7885800	15436000	16967000	18501000	16043000	17008000	15762000	8716800	9987500	7662900	1755700	2001300	2209500	3696800	4078700	3445500	3478600	3430900	3775600	3077700	4305600
Q9D8B3	CHM4B_MOUSE	Charged multivesicular body protein 4b (Chromatin-modifying protein 4b) (CHMP4b)	Chmp4b	2	10	10	10	206.97	437	146170000	8.16486	2338800000	9.36899	227480000	186470000	226200000	133450000	82288000	49937000	228850000	225190000	218130000	197630000	269410000	293730000	437	14303000	14074000	13633000	12352000	16838000	18358000	14218000	11655000	14137000	8340300	5143000	3121100	5974000	6223300	6212800	6897700	7588900	6973700	6195300	5988900	7515300	6292500	4997800
P97352	S10AD_MOUSE	Protein S100-A13 (S100 calcium-binding protein A13)	S100a13	1	5	5	5	68.073	438	144860000	8.16095	1158900000	9.06405	101100000	141960000	107330000	27546000	65777000	29962000	95103000	99845000	121210000	88428000	155150000	125450000	438	11888000	12481000	15151000	11054000	19394000	15682000	12637000	17746000	13417000	3443300	8222100	3745200	3321200	3024000	4306600	3161500	3974200	2834800	3238900	3499400	3534900	2005900	2979700
P62843	RS15_MOUSE	40S ribosomal protein S15 (RIG protein)	Rps15 Rig	1	5	5	5	38.263	439	143760000	8.15764	1437600000	9.15764	103200000	78602000	87637000	51226000	22952000	33408000	284060000	213470000	283310000	39623000	117680000	122350000	439	28406000	21347000	28331000	3962300	11768000	12235000	10320000	7860200	8763700	5122600	2295200	3340800	7082800	8077500	7634800	1837900	2962300	2623800	2833300	3148100	3153400	2934400	1641700
Q3UV17	K22O_MOUSE	Keratin, type II cytoskeletal 2 oral (Keratin-76) (K76) (Type-II keratin Kb9)	Krt76	1	15	2	2	9.3841	440	142880000	8.15497	6429700000	9.80819	0	0	0	349670000	549450000	192810000	481320000	0	583680000	327970000	0	0	440	10696000	0	12971000	7288100	0	0	0	0	0	7770500	12210000	4284700	0	0	11394000	0	0	0	0	0	0	0	0
Q9JI75	NQO2_MOUSE	Ribosyldihydronicotinamide dehydrogenase [quinone] (EC 1.10.5.1) (NRH dehydrogenase [quinone] 2) (NRH:quinone oxidoreductase 2) (Quinone reductase 2) (QR2)	Nqo2 Nmor2	1	13	13	13	110	441	142860000	8.15491	2142800000	9.33098	183500000	147360000	157470000	45730000	81452000	56269000	199580000	217180000	137110000	219050000	303300000	394840000	441	13305000	14479000	9140400	14603000	20220000	26323000	12234000	9824300	10498000	3048700	5430100	3751300	6060500	6358000	6014800	6977500	8233500	7893100	4981100	4820000	5433000	2340300	4708400
P29391	FRIL1_MOUSE	Ferritin light chain 1 (Ferritin L subunit 1)	Ftl1 Ftl Ftl-1	2	10	10	10	142.28	442	140480000	8.14761	2107200000	9.32371	67299000	109410000	124350000	45756000	11125000	0	255340000	220320000	164480000	20604000	529150000	559330000	442	17023000	14688000	10965000	1373600	35277000	37289000	4486600	7293900	8289800	3050400	741640	0	7564800	6968600	5341000	1552800	16686000	10680000	2337100	2818800	4109800	2169500	948760
Q91X72	HEMO_MOUSE	Hemopexin	Hpx Hpxn	1	5	5	5	14.67	443	140350000	8.14721	4771900000	9.67869	453510000	709580000	446550000	113640000	144620000	74259000	323740000	280640000	255470000	180690000	249390000	312210000	443	9521600	8254200	7513800	5314400	7335100	9182600	13339000	20870000	13134000	3342300	4253500	2184100	12814000	12615000	15125000	7352900	9436400	8152800	18876000	22741000	16125000	6092200	9091500
O55131	SEPT7_MOUSE	Septin-7 (CDC10 protein homolog)	Sept7 Cdc10	2	19	19	17	108.29	444	140090000	8.14641	4482800000	9.65155	355000000	368040000	409830000	297730000	212290000	151110000	396960000	349120000	315830000	488500000	545990000	592250000	444	12405000	10910000	9869600	15266000	17062000	18508000	11094000	11501000	12807000	9304100	6634200	4722100	12325000	12064000	11446000	13187000	14496000	13698000	11065000	11909000	12628000	10034000	7720200
Q76MZ3	2AAA_MOUSE	Serine/threonine-protein phosphatase 2A 65 kDa regulatory subunit A alpha isoform (PP2A subunit A isoform PR65-alpha) (PP2A subunit A isoform R1-alpha)	Ppp2r1a	1	24	24	20	182.3	445	140020000	8.14619	6020900000	9.77966	476380000	493110000	465670000	293420000	255700000	199790000	602360000	616070000	561890000	595460000	684120000	776910000	445	14008000	14327000	13067000	13848000	15910000	18068000	11079000	11468000	10829000	6823800	5946500	4646400	20371000	20483000	19218000	17932000	19120000	19760000	14008000	13888000	15633000	11855000	12509000
Q9CXW3	CYBP_MOUSE	Calcyclin-binding protein (CacyBP) (Siah-interacting protein)	Cacybp Sip	1	13	13	13	76.405	446	139210000	8.14367	2784100000	9.44468	189220000	144630000	190490000	99377000	87140000	64979000	399010000	372960000	334840000	216780000	301050000	383650000	446	19951000	18648000	16742000	10839000	15052000	19183000	9461200	7231400	9524400	4968900	4357000	3249000	12929000	12961000	10613000	5893800	7454700	9070100	6288600	5221600	5969600	4804600	4405700
P16043	SLIB_MOUSE	Somatoliberin (Growth hormone-releasing factor) (GRF) (Growth hormone-releasing hormone) (GHRH)	Ghrh	1	5	5	5	37.073	447	139000000	8.14301	1112000000	9.0461	279710000	305890000	212690000	145190000	13654000	17674000	0	0	0	14023000	52336000	70807000	447	0	0	0	1752900	6542000	8850900	34963000	38237000	26587000	18149000	1706800	2209200	0	0	0	657010	1806400	1268000	7184600	7769100	6188200	6676100	850070
P56376	ACYP1_MOUSE	Acylphosphatase-1 (EC 3.6.1.7) (Acylphosphatase, organ-common type isozyme) (Acylphosphate phosphohydrolase 1)	Acyp1 Acype	1	7	7	7	66.715	448	138690000	8.14205	1248200000	9.09628	141130000	122420000	114990000	107980000	76074000	52989000	64278000	57128000	50607000	120940000	150700000	189000000	448	7142000	6347500	5623000	13438000	16744000	21000000	15681000	13603000	12777000	11998000	8452600	5887700	2103200	2102800	1953200	3676400	4495800	4466700	4046800	3619800	3747100	4289300	3313300
O70492	SNX3_MOUSE	Sorting nexin-3 (SDP3 protein)	Snx3	1	11	11	9	53.509	449	138680000	8.14201	1941600000	9.28816	178930000	153700000	205440000	70389000	123950000	86900000	132910000	151670000	131090000	194540000	224520000	287550000	449	9493500	10834000	9363400	13895000	16037000	20540000	12781000	10978000	14674000	5027800	8853600	6207200	4434200	4892300	4273700	7243000	5974500	6679600	5117600	4829200	5570000	3117200	6711600
P19096	FAS_MOUSE	Fatty acid synthase (EC 2.3.1.85) [Includes: [Acyl-carrier-protein] S-acetyltransferase (EC 2.3.1.38); [Acyl-carrier-protein] S-malonyltransferase (EC 2.3.1.39); 3-oxoacyl-[acyl-carrier-protein] synthase (EC 2.3.1.41); 3-oxoacyl-[acyl-carrier-protein] reductase (EC 1.1.1.100); 3-hydroxyacyl-[acyl-carrier-protein] dehydratase (EC 4.2.1.59); Enoyl-[acyl-carrier-protein] reductase (EC 1.3.1.39); Ole…	Fasn	1	88	88	88	323.31	450	138500000	8.14145	20636000000	10.3146	1464000000	1485600000	1497300000	610720000	678410000	598590000	2569000000	2602600000	2135900000	1810800000	2258800000	2924200000	450	17242000	17467000	14335000	12153000	15160000	19626000	9825600	9970800	10049000	4098800	4553100	4017400	77829000	80607000	71982000	60723000	63066000	62549000	43770000	44172000	47639000	32775000	36447000
P49722	PSA2_MOUSE	Proteasome subunit alpha type-2 (EC 3.4.25.1) (Macropain subunit C3) (Multicatalytic endopeptidase complex subunit C3) (Proteasome component C3)	Psma2 Lmpc3	1	12	12	12	70.534	451	138500000	8.14145	2493000000	9.39672	193680000	146190000	109820000	239230000	197880000	152100000	203020000	176060000	151070000	345900000	331630000	244970000	451	11279000	9780900	8392700	19216000	18424000	13609000	10760000	8121500	6101300	13290000	10993000	8450200	6502500	6168100	5659700	9400100	7513500	6450600	6815300	7542800	7567700	8825200	7154900
Q9DBG3	AP2B1_MOUSE	AP-2 complex subunit beta (AP105B) (Adaptor protein complex AP-2 subunit beta) (Adaptor-related protein complex 2 subunit beta) (Beta-2-adaptin) (Beta-adaptin) (Clathrin assembly protein complex 2 beta large chain) (Plasma membrane adaptor HA2/AP2 adaptin beta subunit)	Ap2b1 Clapb1	1	38	38	24	241.71	452	138280000	8.14076	7190500000	9.85676	708460000	688520000	1380200000	375440000	355090000	305580000	375500000	408960000	447680000	574390000	776960000	750050000	452	7221100	7864700	8609200	11046000	14942000	14424000	13624000	13241000	26543000	7219900	6828600	5876500	15484000	16752000	16797000	19795000	20402000	19617000	22626000	22896000	23927000	18380000	17827000
Q9ET01	PYGL_MOUSE	Glycogen phosphorylase, liver form (EC 2.4.1.1)	Pygl	1	40	40	35	323.31	453	137680000	8.13887	8398200000	9.92419	903880000	952500000	807000000	896730000	553690000	547070000	81250000	90693000	88428000	942130000	1262700000	1265500000	453	1332000	1486800	1449600	15445000	20700000	20747000	14818000	15615000	13230000	14700000	9076900	8968400	3502200	3062500	4441100	26681000	32698000	24881000	25939000	25748000	28536000	44827000	23362000
P62862	RS30_MOUSE	40S ribosomal protein S30	Fau	1	3	3	3	5.3415	454	137300000	8.13767	686520000	8.83665	49580000	46218000	53745000	19390000	13220000	8296800	122850000	114790000	96615000	39782000	54093000	67941000	454	24570000	22958000	19323000	7956300	10819000	13588000	9915900	9243500	10749000	3878000	2643900	1659400	0	0	2706900	2170400	0	0	0	0	0	0	0
P80315	TCPD_MOUSE	T-complex protein 1 subunit delta (TCP-1-delta) (A45) (CCT-delta)	Cct4 Cctd	1	27	27	27	323.31	455	136050000	8.1337	5578100000	9.74649	496400000	467590000	428990000	406850000	233840000	245560000	490710000	420640000	425420000	549460000	709560000	703100000	455	11968000	10260000	10376000	13401000	17306000	17149000	12107000	11405000	10463000	9923300	5703500	5989300	15353000	14375000	15176000	17215000	18076000	16363000	14143000	14495000	15855000	17031000	12337000
P62900	RL31_MOUSE	60S ribosomal protein L31	Rpl31	1	6	6	6	45.265	456	135720000	8.13264	1357200000	9.13264	112670000	87831000	103820000	51805000	41571000	27504000	209910000	230900000	174660000	94247000	103240000	119060000	456	20991000	23090000	17466000	9424700	10324000	11906000	11267000	8783100	10382000	5180500	4157100	2750400	6657400	7470000	6356400	3254600	2929900	2670900	3070300	2979800	3211300	2006500	2299700
Q60972	RBBP4_MOUSE	Histone-binding protein RBBP4 (Chromatin assembly factor 1 subunit C) (CAF-1 subunit C) (Chromatin assembly factor I p48 subunit) (CAF-I 48 kDa subunit) (CAF-I p48) (Nucleosome-remodeling factor subunit RBAP48) (Retinoblastoma-binding protein 4) (RBBP-4) (Retinoblastoma-binding protein p48)	Rbbp4 Rbap48	1	12	12	8	132.84	457	135330000	8.13139	2436000000	9.38668	255400000	237020000	220460000	118260000	100500000	78272000	229020000	312820000	318070000	119440000	225680000	221050000	457	12723000	17379000	17671000	6635600	12538000	12281000	14189000	13168000	12248000	6570000	5583600	4348500	8789000	9000700	10586000	3715700	6129600	6333300	6836900	6828000	7168500	4981800	5447200
Q3TW96	UAP1L_MOUSE	UDP-N-acetylhexosamine pyrophosphorylase-like protein 1 (EC 2.7.7.-)	Uap1l1	2	23	23	23	79.421	458	135140000	8.13078	5000300000	9.699	410820000	362760000	323020000	286960000	255010000	174750000	330650000	384840000	272690000	633280000	721040000	844440000	458	8936500	10401000	7370000	17116000	19487000	22823000	11103000	9804400	8730200	7755600	6892200	4723000	12554000	13454000	10726000	16988000	18607000	19744000	10985000	11568000	11793000	11221000	11388000
Q99KQ4	NAMPT_MOUSE	Nicotinamide phosphoribosyltransferase (NAmPRTase) (Nampt) (EC 2.4.2.12) (Pre-B-cell colony-enhancing factor 1 homolog) (PBEF) (Visfatin)	Nampt Pbef1	1	25	25	25	160.74	459	135080000	8.13059	4728000000	9.67468	463870000	452950000	430400000	383230000	287220000	192210000	215760000	146900000	158180000	484350000	713280000	799640000	459	6164500	4197200	4519300	13839000	20379000	22847000	13253000	12941000	12297000	10949000	8206200	5491600	6889000	7248800	7386700	16965000	18067000	16375000	12247000	11797000	13291000	16639000	13611000
P30681	HMGB2_MOUSE	High mobility group protein B2 (High mobility group protein 2) (HMG-2)	Hmgb2 Hmg2	1	10	10	10	53.538	460	134660000	8.12924	2019900000	9.30533	139410000	152410000	163450000	71036000	14069000	23264000	313010000	296720000	288990000	117260000	236960000	203320000	460	20867000	19781000	19266000	7817100	15798000	13555000	9293900	10161000	10897000	4735700	937950	1551000	8879800	8887800	9916900	5909000	5247000	3796600	4159300	4822900	4832900	3995200	1511300
P34022	RANG_MOUSE	Ran-specific GTPase-activating protein (HpaII tiny fragments locus 9a protein) (Ran-binding protein 1) (RANBP1)	Ranbp1 Htf9-a Htf9a	1	6	6	6	35.986	461	133780000	8.12639	1872900000	9.27251	156460000	177310000	154060000	82440000	61236000	35259000	180160000	200170000	194640000	212350000	213520000	205250000	461	12869000	14298000	13903000	15168000	15251000	14661000	11176000	12665000	11004000	5888600	4374000	2518500	7326600	6538500	6298900	6447500	5752900	5452700	3976000	4962100	5355300	3227000	2500500
Q9QUI0	RHOA_MOUSE	Transforming protein RhoA	Rhoa Arha Arha2	2	9	9	2	151.5	462	133740000	8.12626	2139900000	9.33039	174770000	169940000	200640000	180640000	140760000	90843000	172240000	158610000	138020000	217780000	257390000	238270000	462	10765000	9913000	8626200	13611000	16087000	14892000	10923000	10621000	12540000	11290000	8797700	5677700	5440600	5604500	5494500	4667900	6987800	6048600	5716200	5759900	6899800	6711300	5299000
Q9CQU0	TXD12_MOUSE	Thioredoxin domain-containing protein 12 (EC 1.8.4.2) (Endoplasmic reticulum resident protein 19) (ER protein 19) (ERp19) (Thioredoxin-like protein p19)	Txndc12 Tlp19	1	9	9	9	20.457	463	133200000	8.1245	1864800000	9.27063	110720000	114630000	137700000	284150000	234060000	161550000	70122000	68272000	97577000	98494000	205380000	282160000	463	5008700	4876500	6969800	7035300	14670000	20155000	7908400	8187900	9836100	20296000	16718000	11539000	2792900	3403700	3926400	5589300	5303100	5632300	4111300	3526900	4771100	11467000	10801000
P29341	PABP1_MOUSE	Polyadenylate-binding protein 1 (PABP-1) (Poly(A)-binding protein 1)	Pabpc1 Pabp1	1	28	28	28	323.31	464	132520000	8.12228	7288800000	9.86266	724330000	782920000	618840000	405220000	358750000	283210000	737220000	667950000	733710000	557230000	595000000	824370000	464	13404000	12145000	13340000	10131000	10818000	14989000	13170000	14235000	11252000	7367700	6522800	5149300	23045000	24520000	24303000	17476000	18554000	17633000	17940000	19942000	18112000	18800000	17182000
Q9CVB6	ARPC2_MOUSE	Actin-related protein 2/3 complex subunit 2 (Arp2/3 complex 34 kDa subunit) (p34-ARC)	Arpc2	1	18	18	18	125.44	465	132130000	8.121	3567500000	9.55236	293520000	288680000	287490000	260210000	217780000	190270000	248380000	251300000	251420000	334180000	439560000	504720000	465	9199300	9307500	9311700	12377000	16280000	18693000	10871000	10692000	10648000	9637500	8066100	7047200	8969400	9267100	9543900	11896000	10649000	9877100	7865900	8620400	9421200	11564000	11460000
Q9WU78	PDC6I_MOUSE	Programmed cell death 6-interacting protein (ALG-2-interacting protein 1) (ALG-2-interacting protein X) (E2F1-inducible protein) (Eig2)	Pdcd6ip Aip1 Alix	1	44	44	44	300.57	466	131910000	8.12028	8838000000	9.94635	875140000	839230000	817920000	557960000	312690000	294860000	743900000	769580000	693740000	817180000	971520000	1142600000	466	11103000	11486000	10354000	12197000	14500000	17054000	13062000	12526000	12208000	8327800	4667000	4400900	22648000	26482000	24654000	25563000	25089000	25770000	26310000	24479000	26814000	24353000	17558000
Q9EST5	AN32B_MOUSE	Acidic leucine-rich nuclear phosphoprotein 32 family member B (Proliferation-related acidic leucine-rich protein PAL31)	Anp32b Pal31	1	7	5	5	43.248	467	131210000	8.11797	1968100000	9.29405	111040000	133020000	168190000	113680000	98726000	48192000	264100000	212630000	213860000	123140000	193120000	288430000	467	17606000	14175000	14258000	8209500	12875000	19228000	7402400	8867700	11213000	7579000	6581700	3212800	7058700	6723700	6291500	6203900	5142800	5363700	2829400	4858800	5154900	4078000	4643300
P27046	MA2A1_MOUSE	Alpha-mannosidase 2 (EC 3.2.1.114) (Golgi alpha-mannosidase II) (AMan II) (Man II) (Mannosidase alpha class 2A member 1) (Mannosyl-oligosaccharide 1,3-1,6-alpha-mannosidase)	Man2a1 Mana2	1	45	45	44	323.31	468	130400000	8.11528	9649700000	9.98451	1646600000	1780000000	1339300000	844740000	1070400000	836250000	194740000	228940000	155800000	321920000	478260000	752850000	468	2631600	3093800	2105400	4350300	6463000	10174000	22251000	24054000	18098000	11415000	14465000	11301000	9067300	10446000	9286600	14702000	16416000	19616000	42940000	46408000	37268000	35104000	45233000
Q80X90	FLNB_MOUSE	Filamin-B (FLN-B) (ABP-280-like protein) (Actin-binding-like protein) (Beta-filamin)	Flnb	1	113	113	101	323.31	469	130230000	8.11471	21227000000	10.3269	2321000000	2204100000	1932400000	1491100000	1198800000	987190000	1647500000	1416900000	1419000000	1925500000	2049900000	2628900000	469	10108000	8692400	8705800	11813000	12576000	16128000	14239000	13522000	11855000	9148200	7354500	6056400	52125000	48262000	53706000	61100000	56438000	57430000	67329000	61241000	62724000	63307000	57651000
Q61753	SERA_MOUSE	D-3-phosphoglycerate dehydrogenase (3-PGDH) (EC 1.1.1.95) (A10)	Phgdh	1	20	20	20	108.44	470	130230000	8.11471	3646600000	9.56189	360470000	351530000	357430000	183980000	117690000	87798000	415140000	409330000	331160000	340730000	361940000	329370000	470	14826000	14619000	11827000	12169000	12926000	11763000	12874000	12555000	12765000	6570800	4203000	3135700	11748000	12367000	11013000	10827000	9395000	8687900	9730400	10287000	12491000	9201300	6861600
P80313	TCPH_MOUSE	T-complex protein 1 subunit eta (TCP-1-eta) (CCT-eta)	Cct7 Ccth	1	23	23	23	219.77	471	130170000	8.11451	4816200000	9.6827	377740000	389830000	384540000	350640000	234140000	208360000	436800000	414440000	401390000	487830000	482490000	642370000	471	11805000	11201000	10849000	13184000	13040000	17361000	10209000	10536000	10393000	9476700	6328100	5631300	13828000	12679000	13811000	14047000	15956000	14914000	10947000	14433000	12346000	14256000	10776000
Q7TQI3	OTUB1_MOUSE	Ubiquitin thioesterase OTUB1 (EC 3.4.19.12) (Deubiquitinating enzyme OTUB1) (OTU domain-containing ubiquitin aldehyde-binding protein 1) (Otubain-1) (Ubiquitin-specific-processing protease OTUB1)	Otub1	1	11	11	11	109.96	472	129030000	8.11069	2322600000	9.36597	179430000	167350000	181270000	132690000	113010000	94322000	216070000	197930000	157520000	228650000	280710000	373600000	472	12004000	10996000	8751300	12703000	15595000	20756000	9968500	9297300	10070000	7371900	6278600	5240100	6436800	7113100	6297600	7093500	8648900	8232200	5617300	5400200	6009000	5158700	5365300
Q9JII6	AK1A1_MOUSE	Alcohol dehydrogenase [NADP(+)] (EC 1.1.1.2) (Aldehyde reductase) (Aldo-keto reductase family 1 member A1)	Akr1a1 Akr1a4	1	18	18	18	181.74	473	128890000	8.11022	3480000000	9.54158	263970000	320940000	290550000	221710000	209640000	150880000	246090000	266570000	236820000	337920000	375720000	559130000	473	9114400	9873000	8771200	12516000	13916000	20709000	9776800	11887000	10761000	8211600	7764500	5588200	8868200	9488400	8637200	11081000	10638000	13360000	8576500	8779200	7978600	8628600	9890700
P63038	CH60_MOUSE	60 kDa heat shock protein, mitochondrial (EC 3.6.4.9) (60 kDa chaperonin) (Chaperonin 60) (CPN60) (HSP-65) (Heat shock protein 60) (HSP-60) (Hsp60) (Mitochondrial matrix protein P1)	Hspd1 Hsp60	1	28	28	28	323.31	474	128830000	8.11002	5153000000	9.71206	239120000	264720000	236730000	710500000	599520000	555230000	300810000	282380000	389150000	436040000	471280000	667560000	474	7520200	7059400	9728800	10901000	11782000	16689000	5977900	6618000	5918200	17763000	14988000	13881000	11134000	12591000	15464000	14153000	15440000	16993000	9127100	10973000	9547200	28843000	25483000
P05977	MYL1_MOUSE	Myosin light chain 1/3, skeletal muscle isoform (MLC1/MLC3) (MLC1F/MLC3F) (Myosin light chain alkali 1/2) (Myosin light chain A1/A2)	Myl1 Mylf	1	15	15	11	65.763	475	127490000	8.10548	1912300000	9.28156	127220000	109210000	89613000	105250000	79796000	100930000	101740000	205830000	88015000	87685000	145770000	232100000	475	6782800	13722000	5867600	5845700	9717700	15473000	8481200	7280400	5974200	7016900	5319800	6728900	2841100	5852300	2781700	1005400	1208400	5907200	4416800	0	0	0	0
P30416	FKBP4_MOUSE	Peptidyl-prolyl cis-trans isomerase FKBP4 (PPIase FKBP4) (EC 5.2.1.8) (52 kDa FK506-binding protein) (52 kDa FKBP) (FKBP-52) (59 kDa immunophilin) (p59) (FK506-binding protein 4) (FKBP-4) (FKBP59) (HSP-binding immunophilin) (HBI) (Immunophilin FKBP52) (Rotamase) [Cleaved into: Peptidyl-prolyl cis-trans isomerase FKBP4, N-terminally processed]	Fkbp4 Fkpb52	1	27	27	27	210.06	476	127360000	8.10503	4839900000	9.68484	390450000	303690000	288750000	164400000	109260000	130900000	685250000	593900000	547790000	366510000	476520000	782010000	476	18033000	15629000	14416000	9645100	12540000	20579000	10275000	7991900	7598600	4326400	2875400	3444700	19635000	18114000	18022000	12039000	12789000	15353000	10718000	8905800	10397000	7952100	7909000
P61961	UFM1_MOUSE	Ubiquitin-fold modifier 1	Ufm1	1	4	4	4	37	477	127350000	8.105	636740000	8.80396	65808000	46764000	40134000	32162000	35748000	27210000	62610000	57057000	45895000	76802000	72144000	74411000	477	12522000	11411000	9179000	15360000	14429000	14882000	13162000	9352800	8026700	6432500	7149500	5442100	1814500	1601500	1313600	3101100	1585000	1998600	1821900	1549600	1729000	1458500	1643500
P08228	SODC_MOUSE	Superoxide dismutase [Cu-Zn] (EC 1.15.1.1)	Sod1	1	4	4	4	67.702	478	127100000	8.10415	1398100000	9.14554	53044000	34971000	76078000	7597200	22907000	16022000	184420000	272980000	140010000	18460000	277400000	294190000	478	16765000	24817000	12728000	1678200	25218000	26745000	4822200	3179200	6916100	690650	2082400	1456500	5758000	8326800	5349700	1059800	8661600	6234800	1268700	1023200	1885900	0	1435900
Q61990	PCBP2_MOUSE	Poly(rC)-binding protein 2 (Alpha-CP2) (CTBP) (CBP) (Putative heterogeneous nuclear ribonucleoprotein X) (hnRNP X)	Pcbp2 Cbp Hnrnpx Hnrpx	3	12	9	9	84.538	479	127050000	8.10397	2795200000	9.44641	278850000	216180000	264460000	139950000	92805000	66217000	330800000	326100000	300920000	166900000	273720000	338290000	479	15036000	14823000	13678000	7586200	12442000	15377000	12675000	9826500	12021000	6361500	4218400	3009900	10387000	9836400	10079000	8246000	7474800	7329500	7116200	6005700	7493300	5588800	4735600
P17710	HXK1_MOUSE	Hexokinase-1 (EC 2.7.1.1) (Hexokinase type I) (HK I) (Hexokinase, tumor isozyme)	Hk1	1	42	42	36	323.31	480	126430000	8.10185	8470900000	9.92793	841260000	868380000	883000000	913670000	935920000	689850000	127960000	127610000	179860000	754190000	1198900000	950140000	480	1909800	1904600	2684500	11257000	17894000	14181000	12556000	12961000	13179000	13637000	13969000	10296000	7812400	7643000	10776000	26935000	30884000	26338000	27068000	26561000	27807000	36422000	37244000
O08992	SDCB1_MOUSE	Syntenin-1 (Scaffold protein Pbp1) (Syndecan-binding protein 1)	Sdcbp	1	10	10	10	223.17	481	126120000	8.10078	2017900000	9.3049	233600000	203850000	223380000	172980000	56962000	62372000	204960000	254370000	211620000	75904000	114490000	203380000	481	12810000	15898000	13226000	4744000	7155600	12712000	14600000	12741000	13961000	10812000	3560100	3898300	5118200	5390200	5524500	2937200	3341900	3156200	4871900	4389200	3954200	5813500	2769100
Q9QXT0	CNPY2_MOUSE	Protein canopy homolog 2 (MIR-interacting saposin-like protein) (Putative secreted protein ZSIG9) (Transmembrane protein 4)	Cnpy2 Msap Tmem4 Zsig9	1	11	11	11	62.86	482	125890000	8.09999	1636600000	9.21394	107960000	144240000	133620000	262240000	209300000	137080000	25186000	79184000	89553000	86110000	157690000	204400000	482	1937400	6091100	6888700	6623900	12130000	15723000	8304400	11096000	10279000	20172000	16100000	10545000	1992600	2751100	2863800	3747200	4422900	3993000	3255100	4319800	3809500	9243200	11634000
O09167	RL21_MOUSE	60S ribosomal protein L21	Rpl21	1	5	5	5	33.818	483	125520000	8.09871	1882800000	9.2748	104820000	106710000	78178000	53459000	27613000	24499000	395860000	329010000	339030000	132240000	156670000	134720000	483	26391000	21934000	22602000	8816000	10445000	8981400	6987900	7114200	5211900	3563900	1840900	1633300	10614000	9049500	9215300	3271800	3693200	3299800	3156200	3292800	3807400	2848000	2437800
P08207	S10AA_MOUSE	Protein S100-A10 (Calpactin I light chain) (Calpactin-1 light chain) (Cellular ligand of annexin II) (S100 calcium-binding protein A10) (p10 protein) (p11)	S100a10 Cal1l	1	3	3	3	159.14	484	125440000	8.09844	1003500000	9.00152	83802000	86131000	7892800	231910000	198990000	160510000	14107000	27297000	0	60394000	29078000	103420000	484	1763300	3412100	0	7549200	3634800	12928000	10475000	10766000	986600	28989000	24874000	20064000	0	0	0	10100000	0	0	0	0	0	8409400	7385400
P63005	LIS1_MOUSE	Platelet-activating factor acetylhydrolase IB subunit alpha (Lissencephaly-1 protein) (LIS-1) (PAF acetylhydrolase 45 kDa subunit) (PAF-AH 45 kDa subunit) (PAF-AH alpha) (PAFAH alpha)	Pafah1b1 Lis-1 Lis1 Pafaha	1	19	19	19	145.15	485	124610000	8.09555	3987400000	9.60069	352650000	320570000	373670000	241560000	168070000	124050000	268900000	318130000	249610000	451680000	448530000	667370000	485	8403100	9941500	7800200	14115000	14017000	20855000	11020000	10018000	11677000	7548700	5252200	3876600	10177000	10622000	9404900	12445000	12555000	13418000	10680000	9240200	11321000	8940000	8265500
P62075	TIM13_MOUSE	Mitochondrial import inner membrane translocase subunit Tim13	Timm13 Tim13a Timm13a	1	6	6	6	26.664	486	124530000	8.09527	871700000	8.94037	40720000	22699000	20200000	135720000	118230000	54403000	77685000	84609000	67638000	92765000	78602000	78426000	486	11098000	12087000	9662600	13252000	11229000	11204000	5817100	3242700	2885700	19389000	16890000	7771800	2999000	2638800	3079500	3058900	3475800	1813200	1473500	0	1969200	4582100	4391800
Q9WTM5	RUVB2_MOUSE	RuvB-like 2 (EC 3.6.4.12) (p47 protein)	Ruvbl2	1	24	24	24	168.7	487	123810000	8.09276	3961800000	9.59789	325920000	359260000	350590000	156480000	172940000	129120000	312500000	331370000	359660000	328300000	509090000	626610000	487	9765600	10355000	11239000	10259000	15909000	19582000	10185000	11227000	10956000	4890000	5404500	4034900	10538000	10236000	12530000	11594000	12458000	12037000	8960900	9432200	11462000	7801800	10264000
P02463	CO4A1_MOUSE	Collagen alpha-1(IV) chain [Cleaved into: Arresten]	Col4a1	1	9	9	9	194.37	488	123780000	8.09265	11016000000	10.042	1622100000	1708500000	1313600000	343810000	388400000	206490000	799160000	992220000	939050000	738520000	892390000	1072000000	488	8979400	11149000	10551000	8298000	10027000	12045000	18226000	19197000	14759000	3863100	4364100	2320100	20906000	25423000	26792000	28503000	25263000	36123000	44713000	45609000	39522000	17211000	20363000
P51670	CCL9_MOUSE	C-C motif chemokine 9 (CCF18) (Macrophage inflammatory protein 1-gamma) (MIP-1-gamma) (Macrophage inflammatory protein-related protein 2) (MRP-2) (Small-inducible cytokine A9) [Cleaved into: CCL9(29-101); CCL9(30-101); CCL9(31-101)]	Ccl9 Mrp2 Scya10 Scya9	1	4	4	4	17.492	489	122860000	8.08941	982910000	8.99251	151750000	176400000	133200000	65985000	64487000	32480000	21637000	19727000	36251000	93558000	86056000	101380000	489	2704700	2465900	4531400	11695000	10757000	12673000	18969000	22050000	16650000	8248200	8060900	4060000	1071900	1345400	1113500	2428800	1772000	3072000	4286500	4400300	3494800	3910500	2692100
Q5XJY5	COPD_MOUSE	Coatomer subunit delta (Archain) (Delta-coat protein) (Delta-COP)	Arcn1 Copd	1	26	26	26	180.07	490	122500000	8.08814	4164900000	9.6196	319220000	257910000	328990000	212640000	209650000	139020000	429070000	392230000	338020000	405630000	498760000	633770000	490	12620000	11536000	9941700	11930000	14669000	18640000	9388900	7585700	9676200	6254200	6166300	4088800	12763000	12791000	11825000	12352000	12650000	12803000	10095000	9734300	12356000	8466400	9301000
P26369	U2AF2_MOUSE	Splicing factor U2AF 65 kDa subunit (U2 auxiliary factor 65 kDa subunit) (U2 snRNP auxiliary factor large subunit)	U2af2 U2af65	1	13	13	13	202.54	491	122480000	8.08807	2817000000	9.44979	272800000	262370000	271190000	164510000	194840000	147640000	186720000	281820000	230570000	188980000	276770000	338790000	491	8118500	12253000	10025000	8216300	12034000	14730000	11861000	11408000	11791000	7152700	8471400	6419100	8898200	8480500	9085900	4453500	7676200	7786700	7570400	7547100	8293600	6398500	8312100
Q9ESY9	GILT_MOUSE	Gamma-interferon-inducible lysosomal thiol reductase (EC 1.8.-.-) (Gamma-interferon-inducible protein IP-30) (Lysosomal thiol reductase IP30)	Ifi30 Gilt Ip30	1	7	7	7	51.433	492	122280000	8.08736	1711900000	9.23348	150840000	188640000	159450000	71634000	156280000	79321000	166580000	154710000	171010000	85749000	106580000	221110000	492	11899000	11051000	12215000	6124900	7612800	15793000	10775000	13474000	11390000	5116700	11163000	5665800	4830900	4972600	5705900	2998700	3758200	4623700	3944300	5123900	5815300	3845600	7092900
Q9CXW4	RL11_MOUSE	60S ribosomal protein L11	Rpl11	1	7	7	7	31.78	493	122070000	8.08661	1831100000	9.26271	123640000	106280000	126390000	87600000	77175000	54025000	293300000	247360000	256830000	145190000	171510000	141800000	493	19553000	16490000	17122000	9679000	11434000	9453600	8242900	7085100	8425700	5840000	5145000	3601700	8093200	7524300	7632800	4901600	4735300	4508400	4475500	4004600	4773900	3871600	3746000
O55234	PSB5_MOUSE	Proteasome subunit beta type-5 (EC 3.4.25.1) (Macropain epsilon chain) (Multicatalytic endopeptidase complex epsilon chain) (Proteasome chain 6) (Proteasome epsilon chain) (Proteasome subunit X)	Psmb5	1	11	11	11	60.923	494	121540000	8.08472	2187700000	9.33999	143780000	128810000	118040000	108640000	58902000	68588000	242440000	236270000	231150000	234090000	288200000	328800000	494	13469000	13126000	12842000	13005000	16011000	18267000	7987600	7156300	6558000	6035500	3272300	3810400	6892200	6489300	7556900	8199800	7302400	6531000	4950700	5249000	5107000	4683800	4584200
Q9CWZ3	RBM8A_MOUSE	RNA-binding protein 8A (RNA-binding motif protein 8A) (Ribonucleoprotein RBM8A)	Rbm8a Rbm8	1	3	3	3	63.645	495	121460000	8.08443	1093100000	9.03866	119160000	99832000	99476000	51550000	70311000	47622000	93807000	104630000	110510000	47749000	120070000	128420000	495	10423000	11626000	12279000	5305400	13341000	14268000	13240000	11092000	11053000	5727800	7812300	5291300	3072200	3240600	3844300	1980100	3635900	2884500	3258000	2542400	2658200	2772100	3639800
O70326	GREM1_MOUSE	Gremlin-1 (Cysteine knot superfamily 1, BMP antagonist 1) (Down-regulated in Mos-transformed cells protein)	Grem1 Cktsf1b1 Drm	2	8	8	8	37.379	496	121380000	8.08415	1335200000	9.12555	62688000	16758000	6170700	110610000	27489000	43448000	320820000	293010000	278190000	54542000	68510000	52996000	496	29165000	26637000	25290000	4958400	6228200	4817800	5698900	1523400	560970	10056000	2499000	3949800	7509200	9857300	8804500	3511500	2348500	1813500	0	0	0	3723000	3017700
Q8CG16	C1RA_MOUSE	Complement C1r-A subcomponent (EC 3.4.21.41) (Complement component 1 subcomponent r-A) [Cleaved into: Complement C1r-A subcomponent heavy chain; Complement C1r-A subcomponent light chain]	C1ra C1r	2	25	25	23	323.31	497	120540000	8.08113	5183300000	9.71461	834780000	846400000	602420000	383370000	646070000	241680000	66672000	113590000	75091000	337550000	340700000	695020000	497	1550500	2641600	1746300	7849900	7923400	16163000	19413000	19684000	14010000	8915600	15025000	5620400	3353600	5296600	3988700	12190000	13245000	14639000	22282000	21136000	17060000	16344000	24206000
Q9WTX5	SKP1_MOUSE	S-phase kinase-associated protein 1 (Cyclin-A/CDK2-associated protein p19) (S-phase kinase-associated protein 1A) (p19A) (p19skp1)	Skp1 Skp1a	1	11	11	11	98.562	498	120350000	8.08045	1685000000	9.2266	165680000	160960000	166540000	79676000	67220000	32512000	130240000	148090000	118940000	170230000	189310000	255560000	498	9302900	10578000	8495800	12159000	13522000	18255000	11834000	11497000	11896000	5691100	4801400	2322300	4278000	4498300	5203000	5044500	5153400	4883200	4018200	4420200	4247100	4030100	3813000
Q9Z175	LOXL3_MOUSE	Lysyl oxidase homolog 3 (EC 1.4.3.-) (EC 1.4.3.13) (Lysyl oxidase-like protein 3) (Lysyl oxidase-related protein 2)	Loxl3 Lor2	1	24	24	24	323.01	499	120230000	8.08001	5891400000	9.77022	590840000	641150000	441950000	162220000	345100000	104060000	431870000	432270000	489730000	571320000	591550000	1089300000	499	8813600	8821900	9994500	11660000	12072000	22231000	12058000	13085000	9019400	3310600	7042800	2123600	13784000	15679000	15664000	18497000	15620000	23610000	16222000	17478000	15958000	7895900	15929000
Q61205	PA1B3_MOUSE	Platelet-activating factor acetylhydrolase IB subunit gamma (EC 3.1.1.47) (PAF acetylhydrolase 29 kDa subunit) (PAF-AH 29 kDa subunit) (PAF-AH subunit gamma) (PAFAH subunit gamma)	Pafah1b3 Pafahg	1	12	12	12	59.631	500	120220000	8.07998	2163900000	9.33524	222520000	215690000	232080000	192010000	148170000	107590000	50350000	45989000	53352000	276710000	250550000	368860000	500	2797200	2555000	2964000	15373000	13919000	20492000	12362000	11983000	12893000	10667000	8231500	5977300	2084200	2136400	2379900	8661800	6549600	6345600	5742700	5657200	6202100	7925700	6575800
P62869	ELOB_MOUSE	Elongin-B (EloB) (Elongin 18 kDa subunit) (RNA polymerase II transcription factor SIII subunit B) (SIII p18) (Transcription elongation factor B polypeptide 2)	Elob Tceb2	1	6	6	6	55.935	501	120120000	8.07962	1321400000	9.12103	147570000	77347000	113020000	73648000	106340000	50796000	129390000	84395000	80842000	135650000	188420000	133960000	501	11762000	7672300	7349300	12332000	17129000	12178000	13415000	7031500	10274000	6695300	9667000	4617800	3333800	2740300	2961100	4449000	3474500	3871500	4489100	5079700	3929300	3464500	3386100
Q8BG32	PSD11_MOUSE	26S proteasome non-ATPase regulatory subunit 11 (26S proteasome regulatory subunit RPN6) (26S proteasome regulatory subunit S9) (26S proteasome regulatory subunit p44.5)	Psmd11	1	24	24	24	128.18	502	119700000	8.07809	3950200000	9.59662	367440000	312250000	361010000	176130000	165190000	153330000	405920000	361740000	362600000	323260000	403440000	557930000	502	12301000	10962000	10988000	9795700	12226000	16907000	11135000	9462200	10940000	5337300	5005700	4646200	12359000	11456000	11827000	9363100	12044000	12397000	10248000	8943400	10476000	8216000	9833000
P00493	HPRT_MOUSE	Hypoxanthine-guanine phosphoribosyltransferase (HGPRT) (HGPRTase) (EC 2.4.2.8) (HPRT B)	Hprt1 Hprt	1	8	8	8	52.037	503	119700000	8.07809	1795500000	9.25419	140320000	169460000	195380000	122720000	94934000	86234000	133090000	102740000	102790000	163660000	242120000	242020000	503	8872700	6849400	6852500	10911000	16141000	16135000	9354800	11297000	13025000	8181700	6329000	5748900	3980200	4472900	4361300	5283800	6871800	6013700	4345400	4560200	5688000	4889900	4875000
Q07813	BAX_MOUSE	Apoptosis regulator BAX	Bax	1	5	5	5	76.016	504	119630000	8.07784	1435500000	9.157	139950000	78050000	118850000	61003000	71438000	31847000	134990000	141370000	122100000	146060000	183160000	206720000	504	11249000	11781000	10175000	12172000	15263000	17227000	11662000	6504200	9904000	5083600	5953200	2654000	4122900	4778600	4785900	3897500	4828000	4185900	3195600	2825900	3106000	2656500	3640400
Q9WUM3	COR1B_MOUSE	Coronin-1B (Coronin-2)	Coro1b	1	14	14	14	121.2	505	118980000	8.07547	3093500000	9.49045	296590000	312540000	253890000	197870000	168940000	156010000	182720000	211940000	178640000	327750000	416980000	389640000	505	7027800	8151600	6870700	12606000	16038000	14986000	11407000	12021000	9765000	7610200	6497800	6000400	5367100	6125100	6008200	11074000	10793000	9666800	8618300	8787200	8774400	8673100	8650900
Q9JIF0	ANM1_MOUSE	Protein arginine N-methyltransferase 1 (EC 2.1.1.319) (Histone-arginine N-methyltransferase PRMT1)	Prmt1 Hrmt1l2 Mrmt1	2	19	19	19	76.084	506	118970000	8.07544	2736400000	9.43718	232930000	221650000	249000000	58182000	118780000	73627000	296620000	323660000	305290000	247670000	272690000	334440000	506	12897000	14072000	13274000	10768000	11856000	14541000	10127000	9637100	10826000	2529700	5164200	3201200	8882100	9297800	9528600	8652000	7594800	7183000	7150800	7065300	7309000	3863000	5837200
Q9JKB1	UCHL3_MOUSE	Ubiquitin carboxyl-terminal hydrolase isozyme L3 (UCH-L3) (EC 3.4.19.12) (Ubiquitin thioesterase L3)	Uchl3	2	10	10	10	92.395	507	118940000	8.07533	2022000000	9.30578	189190000	157340000	198680000	69772000	79383000	53191000	184100000	182910000	172380000	196950000	218750000	319270000	507	10829000	10759000	10140000	11585000	12868000	18780000	11129000	9255200	11687000	4104200	4669600	3128900	6370100	6463600	5351800	5939000	6143600	7097000	5604100	4887700	5890600	3295900	4058800
P62141	PP1B_MOUSE	Serine/threonine-protein phosphatase PP1-beta catalytic subunit (PP-1B) (EC 3.1.3.16) (EC 3.1.3.53)	Ppp1cb	1	15	15	6	224.89	508	118870000	8.07507	2496300000	9.3973	255180000	253920000	256620000	124640000	54109000	43893000	228200000	241500000	227820000	237070000	256810000	316550000	508	10867000	11500000	10848000	11289000	12229000	15074000	12152000	12091000	12220000	5935100	2576600	2090200	6683700	7129400	7351800	7307500	7244200	7282400	6412500	6375700	6554300	5310500	4999000
Q6P5F9	XPO1_MOUSE	Exportin-1 (Exp1) (Chromosome region maintenance 1 protein homolog)	Xpo1 Crm1	1	33	33	33	276.74	509	118180000	8.07254	7563300000	9.87871	608200000	645820000	620800000	327440000	312780000	262510000	757020000	716790000	632770000	663500000	863470000	1152200000	509	11828000	11200000	9887000	10367000	13492000	18004000	9503200	10091000	9700000	5116200	4887200	4101700	23424000	22072000	21953000	21276000	24415000	23403000	17285000	18948000	17972000	17515000	16884000
P31938	MP2K1_MOUSE	Dual specificity mitogen-activated protein kinase kinase 1 (MAP kinase kinase 1) (MAPKK 1) (EC 2.7.12.2) (ERK activator kinase 1) (MAPK/ERK kinase 1) (MEK 1)	Map2k1 Mek1 Prkmk1	2	15	15	15	163.88	510	117730000	8.07089	2825600000	9.45111	588130000	120380000	537840000	116220000	116020000	81620000	56436000	55490000	32055000	209320000	330700000	581370000	510	2351500	2312100	1335600	8721600	13779000	24224000	24505000	5015900	22410000	4842500	4834100	3400800	3636300	4378600	3305200	10515000	11271000	9310800	5599000	6412300	6969800	6978000	6814400
Q9Z0N1	IF2G_MOUSE	Eukaryotic translation initiation factor 2 subunit 3, X-linked (Eukaryotic translation initiation factor 2 subunit gamma, X-linked) (eIF-2-gamma X)	Eif2s3x	2	20	20	20	119.29	511	117200000	8.06893	4688100000	9.671	384660000	345290000	352000000	318150000	264960000	196750000	417620000	405110000	395820000	466180000	515060000	626500000	511	10440000	10128000	9895400	11655000	12876000	15662000	9616600	8632300	8800000	7953700	6623900	4918700	12932000	12664000	12561000	15504000	14383000	14430000	13418000	12009000	12452000	13533000	11567000
P19253	RL13A_MOUSE	60S ribosomal protein L13a (Transplantation antigen P198) (Tum-P198 antigen)	Rpl13a P198 Tstap198-7	1	6	6	6	42.021	512	117160000	8.06878	2108900000	9.32406	146480000	140180000	147510000	75288000	44960000	29285000	379110000	378920000	342690000	114860000	134330000	175310000	512	21062000	21051000	19038000	6381300	7462700	9739400	8137700	7788000	8195200	4182700	2497800	1626900	10721000	11824000	12549000	4837000	4033000	3712000	3909400	3653400	4242800	3483000	2881100
Q62376	RU17_MOUSE	U1 small nuclear ribonucleoprotein 70 kDa (U1 snRNP 70 kDa) (U1-70K) (snRNP70)	Snrnp70 Snrp70	1	12	12	12	103.15	513	117060000	8.06841	2575400000	9.41084	243930000	241030000	231790000	172340000	211160000	118980000	165250000	151390000	188500000	262100000	300420000	288520000	513	7511500	6881500	8568100	11914000	13655000	13115000	11088000	10956000	10536000	7833600	9598200	5408300	4900100	5119400	6200500	7288700	6749200	7091000	7932900	7002700	8236000	6590600	7525900
P05202	AATM_MOUSE	Aspartate aminotransferase, mitochondrial (mAspAT) (EC 2.6.1.1) (EC 2.6.1.7) (Fatty acid-binding protein) (FABP-1) (Glutamate oxaloacetate transaminase 2) (Kynurenine aminotransferase 4) (Kynurenine aminotransferase IV) (Kynurenine--oxoglutarate transaminase 4) (Kynurenine--oxoglutarate transaminase IV) (Plasma membrane-associated fatty acid-binding protein) (FABPpm) (Transaminase A)	Got2 Got-2	1	17	17	17	138.33	514	115580000	8.06288	4276400000	9.63108	307510000	335830000	220920000	329680000	504680000	222090000	356830000	393570000	420890000	239510000	373400000	569420000	514	9644000	10637000	11375000	6473300	10092000	15390000	8311100	9076500	5970700	8910200	13640000	6002300	10871000	11658000	13029000	9602600	10295000	11658000	8150800	8242800	8879400	13574000	26743000
O88958	GNPI1_MOUSE	Glucosamine-6-phosphate isomerase 1 (EC 3.5.99.6) (Glucosamine-6-phosphate deaminase 1) (GNPDA 1) (GlcN6P deaminase 1) (Oscillin)	Gnpda1 Gnpi	1	14	14	12	108.69	515	115440000	8.06236	2077900000	9.31762	155390000	198170000	152510000	154630000	154560000	107090000	86014000	53361000	54979000	221820000	314140000	424520000	515	4778500	2964500	3054400	12324000	17452000	23585000	8632600	11009000	8472700	8590700	8586700	5949600	3874000	3111200	2954400	5333500	7467900	8240700	4832300	6240500	4893000	7032200	6450000
P84099	RL19_MOUSE	60S ribosomal protein L19	Rpl19	1	6	6	6	114.04	516	114820000	8.06002	1722300000	9.23611	71581000	115810000	123870000	51320000	27227000	27151000	342500000	296470000	277900000	105120000	146520000	136830000	516	22834000	19765000	18527000	7008100	9767900	9121700	4772100	7720800	8258000	3421300	1815100	1810000	9483700	9660100	7841600	3898700	3825300	4076300	3680100	3504200	3305400	2510500	1788300
Q61805	LBP_MOUSE	Lipopolysaccharide-binding protein (LBP)	Lbp	1	9	9	9	72.966	517	114320000	8.05812	2857900000	9.45605	339290000	396810000	311390000	314920000	229760000	84189000	40834000	22695000	33487000	183640000	297590000	603300000	517	1633300	907800	1339500	7345800	11904000	24132000	13572000	15872000	12456000	12597000	9190500	3367600	1453200	1286700	1616900	7817200	8766800	14182000	9059500	11054000	8670500	10514000	12327000
Q78PY7	SND1_MOUSE	Staphylococcal nuclease domain-containing protein 1 (EC 3.1.31.1) (100 kDa coactivator) (p100 co-activator)	Snd1	1	42	42	42	323.31	518	114070000	8.05717	8212800000	9.91449	612630000	595770000	584900000	281550000	258320000	195050000	1007100000	1082400000	1000400000	806890000	834260000	953570000	518	13987000	15033000	13895000	11207000	11587000	13244000	8508700	8274500	8123600	3910400	3587700	2709000	29737000	28508000	30466000	25663000	21649000	22381000	18511000	19330000	20147000	13347000	13300000
Q9WTP6	KAD2_MOUSE	Adenylate kinase 2, mitochondrial (AK 2) (EC 2.7.4.3) (ATP-AMP transphosphorylase 2) (ATP:AMP phosphotransferase) (Adenylate monophosphate kinase)	Ak2	1	12	12	12	75.344	519	113910000	8.05656	2050500000	9.31186	72591000	83791000	60121000	227570000	213450000	140050000	208270000	130870000	239140000	116550000	284780000	273290000	519	11570000	7270600	13285000	6475200	15821000	15183000	4032800	4655100	3340100	12643000	11858000	7780500	6730500	6021300	7920600	6164900	6018900	5455900	3267300	2740700	2743200	9695900	9120400
Q8VE43	METRL_MOUSE	Meteorin-like protein (Subfatin)	Metrnl	1	8	8	8	63.213	520	113720000	8.05584	1933300000	9.2863	220280000	189060000	204260000	126280000	209820000	68996000	86245000	81128000	85251000	144820000	148350000	278330000	520	5073200	4772200	5014800	8518700	8726400	16372000	12958000	11121000	12016000	7428000	12342000	4058600	2852700	2961100	3425900	4998600	4100500	6414400	7937400	5846800	6165600	4810000	8375700
O88844	IDHC_MOUSE	Isocitrate dehydrogenase [NADP] cytoplasmic (IDH) (EC 1.1.1.42) (Cytosolic NADP-isocitrate dehydrogenase) (IDP) (NADP(+)-specific ICDH) (Oxalosuccinate decarboxylase)	Idh1	1	19	19	18	165.05	521	112930000	8.05281	4065400000	9.6091	304480000	278480000	279800000	283590000	195520000	183080000	282550000	316460000	235530000	446810000	625330000	632690000	521	7848600	8790500	6542500	12411000	17370000	17575000	8457700	7735400	7772100	7877600	5431200	5085700	9138100	10009000	9632500	10711000	16635000	15654000	10500000	9942700	10218000	10998000	8824600
Q9R062	GLYG_MOUSE	Glycogenin-1 (GN-1) (GN1) (EC 2.4.1.186)	Gyg1 Gyg	1	9	9	9	53.306	522	111520000	8.04735	1338300000	9.12655	135660000	117560000	115190000	108950000	75365000	85092000	63585000	53890000	57547000	130230000	176490000	218730000	522	5298800	4490800	4795600	10853000	14708000	18228000	11305000	9796300	9599200	9078800	6280400	7091000	2462400	2586600	2237200	3046400	4054400	3488300	3333700	3298900	3889000	3804200	4056700
Q9D0R2	SYTC_MOUSE	Threonine--tRNA ligase, cytoplasmic (EC 6.1.1.3) (Threonyl-tRNA synthetase) (ThrRS)	Tars	2	32	32	32	162.67	523	111490000	8.04724	6355100000	9.80312	455880000	449060000	439670000	145700000	156120000	87607000	921330000	899260000	737360000	612530000	671990000	776580000	523	16164000	15777000	12936000	10746000	11789000	13624000	7997900	7878200	7713600	2556200	2738900	1537000	27731000	27122000	25523000	16536000	18587000	19103000	12966000	14177000	13680000	8700700	9885500
Q9CPW4	ARPC5_MOUSE	Actin-related protein 2/3 complex subunit 5 (Arp2/3 complex 16 kDa subunit) (p16-ARC)	Arpc5	1	6	6	6	112.8	524	111340000	8.04665	1558700000	9.19276	75001000	135560000	141710000	100950000	107990000	89116000	121020000	119850000	103750000	169090000	187480000	207180000	524	8644600	8561000	7410400	12078000	13391000	14799000	5357200	9683000	10122000	7210500	7713600	6365400	3829600	3754500	3460500	5421600	4949500	4603000	4095300	3732300	4380000	5028400	5013600
Q9EQH3	VPS35_MOUSE	Vacuolar protein sorting-associated protein 35 (Maternal-embryonic 3) (Vesicle protein sorting 35)	Vps35 Mem3	1	31	31	31	323.31	525	111110000	8.04575	5666500000	9.75331	563500000	578830000	523450000	265960000	276930000	246560000	398450000	402760000	351940000	501630000	677720000	878780000	525	7812800	7897200	6900800	9836000	13289000	17231000	11049000	11350000	10264000	5214800	5429900	4834500	13086000	14173000	13297000	17876000	18387000	18089000	14743000	14808000	15487000	13700000	14839000
Q8BK67	RCC2_MOUSE	Protein RCC2	Rcc2 Kiaa1470	1	24	24	24	282.57	526	110640000	8.04391	3872500000	9.58799	295080000	238360000	204640000	219170000	138610000	133090000	398910000	346160000	338500000	540100000	486080000	533740000	526	11398000	9890400	9671400	15431000	13888000	15250000	8431000	6810200	5847000	6261900	3960400	3802700	13582000	11676000	12806000	14393000	12339000	13188000	8685600	8055900	8185800	8732300	7270800
P28474	ADHX_MOUSE	Alcohol dehydrogenase class-3 (EC 1.1.1.1) (Alcohol dehydrogenase 2) (Alcohol dehydrogenase 5) (Alcohol dehydrogenase B2) (ADH-B2) (Alcohol dehydrogenase class-III) (Glutathione-dependent formaldehyde dehydrogenase) (FALDH) (FDH) (GSH-FDH) (EC 1.1.1.-) (S-(hydroxymethyl)glutathione dehydrogenase) (EC 1.1.1.284)	Adh5 Adh-2 Adh2	1	17	17	15	186.49	527	110470000	8.04324	2651200000	9.42344	169920000	191550000	147920000	201390000	119690000	132990000	160790000	156860000	155860000	333140000	383290000	497820000	527	6699600	6535700	6494000	13881000	15971000	20743000	7079800	7981100	6163200	8391100	4986900	5541400	6461400	5975700	6126300	10042000	9942900	10354000	6074800	5845900	5513600	7655000	7369100
Q9CR57	RL14_MOUSE	60S ribosomal protein L14	Rpl14	1	7	7	7	56.961	528	110250000	8.04238	2204900000	9.34339	109090000	132670000	110660000	91920000	47759000	31044000	430660000	444430000	389290000	154270000	121070000	142050000	528	21533000	22221000	19465000	7713300	6053600	7102600	5454300	6633400	5532900	4596000	2388000	1552200	12380000	12561000	11508000	5113900	4060300	3954600	4915500	4292100	4121900	4780200	2508000
Q4KML4	ABRAL_MOUSE	Costars family protein ABRACL (ABRA C-terminal-like protein)	Abracl	1	3	3	3	18.692	529	110180000	8.0421	550880000	8.74106	29432000	52371000	37273000	24057000	29981000	22881000	56862000	50276000	42786000	53454000	63304000	88199000	529	11372000	10055000	8557100	10691000	12661000	17640000	5886300	10474000	7454700	4811300	5996200	4576200	1741500	1527700	1419300	1745100	1798900	2006900	906440	1406900	1175000	1085600	1359800
Q9CZD3	GARS_MOUSE	Glycine--tRNA ligase (EC 3.6.1.17) (EC 6.1.1.14) (Diadenosine tetraphosphate synthetase) (AP-4-A synthetase) (Glycyl-tRNA synthetase) (GlyRS)	Gars	1	27	27	27	147.24	530	109310000	8.03866	6339700000	9.80207	308210000	329970000	330150000	269560000	231470000	187220000	844440000	799540000	683460000	690770000	897790000	767140000	530	14559000	13785000	11784000	11910000	15479000	13227000	5314100	5689200	5692300	4647600	3990800	3227900	24121000	23018000	22717000	21436000	20846000	18978000	13467000	12634000	14734000	11854000	10772000
P51410	RL9_MOUSE	60S ribosomal protein L9	Rpl9	1	6	6	6	53.958	531	108940000	8.03719	1416300000	9.15116	96385000	81820000	139160000	78697000	57079000	35234000	190710000	213900000	177210000	102870000	140540000	99730000	531	14670000	16454000	13631000	7913000	10811000	7671500	7414200	6293900	10704000	6053600	4390700	2710300	5752900	5850900	5612700	2886700	3492900	3870900	4023900	3389900	4485600	2916700	2508400
Q9DCH4	EIF3F_MOUSE	Eukaryotic translation initiation factor 3 subunit F (eIF3f) (Deubiquitinating enzyme eIF3f) (EC 3.4.19.12) (Eukaryotic translation initiation factor 3 subunit 5) (eIF-3-epsilon) (eIF3 p47)	Eif3f Eif3s5	1	10	10	10	77.084	532	108840000	8.03679	1741500000	9.24092	74894000	105840000	108900000	67433000	85161000	46010000	210030000	244130000	203720000	223710000	226660000	144980000	532	13127000	15258000	12732000	13982000	14166000	9061200	4680900	6615200	6806200	4214500	5322600	2875600	6804600	7367400	6783200	4281400	5634700	4689800	2995900	3657700	5292500	3473600	3810500
C0HKG6	RNT2B_MOUSE	Ribonuclease T2-B (EC 3.1.27.-) (Ribonuclease 6-B)	Rnaset2b	2	6	6	6	156.54	533	108670000	8.03611	1847500000	9.26658	266540000	256660000	203830000	71963000	69776000	20771000	165080000	207200000	172400000	102970000	105630000	204630000	533	9710400	12188000	10141000	6057000	6213500	12037000	15679000	15098000	11990000	4233100	4104400	1221800	5152300	6848500	5980200	3724700	3200700	4603300	6629500	6646400	6572300	3272900	3425800
P54728	RD23B_MOUSE	UV excision repair protein RAD23 homolog B (HR23B) (mHR23B) (XP-C repair-complementing complex 58 kDa protein) (p58)	Rad23b Mhr23b	1	11	11	9	25.68	534	107900000	8.03302	1834400000	9.26349	127920000	119290000	130030000	141140000	151680000	91573000	140830000	135550000	147730000	214460000	223700000	210480000	534	8284400	7973600	8689900	12615000	13159000	12381000	7524900	7017000	7648600	8302100	8922100	5386700	5097600	5155200	5191800	6919500	5989800	5123200	4904500	4158500	4841300	5226500	6179000
Q62348	TSN_MOUSE	Translin (EC 3.1.-.-) (Component 3 of promoter of RISC) (C3PO) (Testis/brain RNA-binding protein) (TB-RBP)	Tsn	1	13	13	13	83.594	535	107620000	8.03189	1937100000	9.28715	146020000	191840000	152110000	188670000	129780000	109780000	160470000	147370000	145010000	137570000	180480000	247990000	535	8914900	8187300	8056100	7643000	10026000	13777000	8112100	10658000	8450400	10482000	7210100	6099000	4957900	4203900	5178500	4682100	6765300	6694100	4800400	6017100	5705200	6512600	4970000
Q9JJU8	SH3L1_MOUSE	SH3 domain-binding glutamic acid-rich-like protein	Sh3bgrl	1	6	6	6	21.052	536	106810000	8.02861	961330000	8.98287	81768000	98151000	67275000	36391000	57475000	22370000	75144000	65948000	62071000	93501000	101490000	189530000	536	8349300	7327500	6896800	10389000	11276000	21059000	9085300	10906000	7475000	4043500	6386100	2485500	2349900	2304600	2079200	3022200	2947500	3669400	2578100	2581500	2227400	2020800	2511400
Q9WVJ2	PSD13_MOUSE	26S proteasome non-ATPase regulatory subunit 13 (26S proteasome regulatory subunit RPN9) (26S proteasome regulatory subunit S11) (26S proteasome regulatory subunit p40.5)	Psmd13	1	20	20	20	125.84	537	106340000	8.0267	3083900000	9.4891	281000000	269380000	251910000	132220000	138250000	116760000	271910000	283400000	280520000	308810000	344290000	405390000	537	9376200	9772400	9673100	10649000	11872000	13979000	9689600	9289000	8686600	4559400	4767400	4026300	8310900	8788600	8648700	9093200	9464100	9487800	8617000	8848100	8674500	6874800	6820200
Q62422	OSTF1_MOUSE	Osteoclast-stimulating factor 1 (SH3 domain protein 3)	Ostf1 Sh3d3 Sh3p2	1	9	9	9	110.42	538	106280000	8.02645	1487900000	9.17257	161120000	160950000	140670000	58770000	52285000	38767000	91514000	117140000	77430000	156910000	178800000	253570000	538	6536700	8367500	5530700	11208000	12771000	18112000	11509000	11497000	10048000	4197900	3734600	2769100	3453000	3500400	2753200	4866300	6018900	4928400	3994500	3915500	4050600	3422700	3182900
Q9DBP5	KCY_MOUSE	UMP-CMP kinase (EC 2.7.4.14) (Deoxycytidylate kinase) (CK) (dCMP kinase) (Nucleoside-diphosphate kinase) (EC 2.7.4.6) (Uridine monophosphate/cytidine monophosphate kinase) (UMP/CMP kinase) (UMP/CMPK)	Cmpk1 Cmk Cmpk Uck Umk Umpk	1	7	7	7	51.407	539	106150000	8.02592	1698400000	9.23004	121340000	125670000	130550000	74878000	73064000	41971000	174610000	176720000	146670000	155590000	214400000	262940000	539	10913000	11045000	9166900	9724100	13400000	16434000	7583800	7854500	8159200	4679900	4566500	2623200	5439100	5475900	4869200	5422400	5746300	6238100	3534200	3799300	4181200	3418500	3286600
Q3TWW8	SRSF6_MOUSE	Serine/arginine-rich splicing factor 6 (Pre-mRNA-splicing factor SRP55) (Splicing factor, arginine/serine-rich 6)	Srsf6 Sfrs6 Srp55	2	11	11	10	49.598	540	106130000	8.02584	2334900000	9.36827	209180000	195270000	191670000	94387000	175150000	106510000	234710000	241890000	264110000	241410000	211150000	169440000	540	10669000	10995000	12005000	10973000	9597800	7701800	9508300	8876000	8712200	4290300	7961500	4841200	7975500	7295500	9270600	6454100	5425400	5252800	5409600	4607300	6087000	4307600	5875500
P32067	LA_MOUSE	Lupus La protein homolog (La autoantigen homolog) (La ribonucleoprotein)	Ssb Ss-b	1	25	25	25	216.31	541	105610000	8.02371	3590800000	9.55519	294630000	276120000	306600000	145380000	141250000	114130000	310660000	345820000	336280000	393630000	413730000	512620000	541	9137100	10171000	9890700	11577000	12168000	15077000	8665600	8121200	9017500	4275800	4154300	3356700	10911000	10840000	11993000	11731000	11661000	11319000	8424500	8088600	9665300	6865200	7155600
P47754	CAZA2_MOUSE	F-actin-capping protein subunit alpha-2 (CapZ alpha-2)	Capza2 Cappa2	1	11	7	7	69.628	542	105210000	8.02206	2209500000	9.34429	204240000	219120000	204960000	226810000	32800000	28314000	136050000	130760000	103690000	259220000	295040000	368450000	542	6478300	6226400	4937600	12344000	14050000	17545000	9725800	10434000	9760100	10800000	1561900	1348300	5164900	5131000	4172600	7618200	8159100	7359000	5074900	6240000	5104500	6598500	4091700
P16675	PPGB_MOUSE	Lysosomal protective protein (EC 3.4.16.5) (Carboxypeptidase C) (Carboxypeptidase L) (Cathepsin A) (Protective protein cathepsin A) (PPCA) (Protective protein for beta-galactosidase) [Cleaved into: Lysosomal protective protein 32 kDa chain; Lysosomal protective protein 20 kDa chain]	Ctsa Ppgb	1	13	13	13	93.617	543	105160000	8.02185	2629000000	9.41979	186780000	272500000	181430000	187850000	429600000	124160000	160080000	120680000	133090000	186060000	283970000	357240000	543	6403100	4827100	5323500	7442300	11359000	14290000	7471100	10900000	7257300	7513800	17184000	4966400	5557700	4480800	6095000	5060100	7543100	9465400	6582100	8301300	7773800	7865800	16537000
O09010	LFNG_MOUSE	Beta-1,3-N-acetylglucosaminyltransferase lunatic fringe (EC 2.4.1.222) (O-fucosylpeptide 3-beta-N-acetylglucosaminyltransferase)	Lfng	1	12	12	12	58.878	544	104890000	8.02073	2727200000	9.43572	231690000	299970000	219000000	129240000	276880000	89732000	98583000	92625000	108370000	298950000	320660000	560350000	544	3791700	3562500	4168200	11498000	12333000	21552000	8911100	11537000	8422900	4970900	10649000	3451200	4109400	5611300	4943900	9092900	8443100	10352000	6641100	7940400	7996300	5405100	10941000
P61924	COPZ1_MOUSE	Coatomer subunit zeta-1 (Zeta-1-coat protein) (Zeta-1 COP)	Copz1 Copz	1	5	5	5	65.294	545	104190000	8.01783	729340000	8.86293	43700000	67224000	85891000	16881000	0	22945000	79580000	79485000	65732000	57477000	84813000	125610000	545	11369000	11355000	9390300	8211000	12116000	17944000	6242800	9603400	12270000	2411500	0	3277800	2261200	2454600	2244700	2491600	2400300	2440800	2032200	1646600	2096400	0	0
P50516	VATA_MOUSE	V-type proton ATPase catalytic subunit A (V-ATPase subunit A) (EC 7.1.2.2) (V-ATPase 69 kDa subunit) (Vacuolar proton pump subunit alpha)	Atp6v1a Atp6a1 Atp6a2 Atp6v1a1	1	31	31	31	190.08	546	103720000	8.01586	4459900000	9.64933	396560000	407320000	378280000	321400000	161430000	187670000	254480000	217170000	220880000	491410000	654540000	768800000	546	5918100	5050400	5136800	11428000	15222000	17879000	9222300	9472600	8797300	7474400	3754200	4364300	8578200	9046000	9237100	13255000	16680000	16030000	11267000	11892000	11473000	13914000	9908600
Q9D0I9	SYRC_MOUSE	Arginine--tRNA ligase, cytoplasmic (EC 6.1.1.19) (Arginyl-tRNA synthetase) (ArgRS)	Rars	1	37	37	37	226.78	547	103200000	8.01368	4953700000	9.69493	381650000	391960000	325780000	341430000	239850000	173660000	406080000	368350000	466240000	483430000	663410000	711890000	547	8460100	7673900	9713400	10071000	13821000	14831000	7951100	8165800	6787100	7113100	4996900	3617900	13619000	14127000	14432000	15166000	16627000	15958000	11769000	12190000	12386000	13334000	11707000
P54923	ADPRH_MOUSE	[Protein ADP-ribosylarginine] hydrolase (ADP-ribosylarginine hydrolase) (EC 3.2.2.19) (ADP-ribose-L-arginine cleaving enzyme)	Adprh Arh1	1	13	13	13	178.97	548	102860000	8.01225	2571600000	9.4102	341860000	340160000	322610000	219470000	243750000	147640000	77825000	72927000	55828000	179670000	250000000	319850000	548	3113000	2917100	2233100	7186900	10000000	12794000	13674000	13606000	12904000	8779000	9749900	5905600	3340600	3327300	2433100	6058900	6421700	6647800	9080600	9050200	9733000	10309000	11658000
P60122	RUVB1_MOUSE	RuvB-like 1 (EC 3.6.4.12) (49 kDa TATA box-binding protein-interacting protein) (49 kDa TBP-interacting protein) (DNA helicase p50) (Pontin 52) (TIP49a)	Ruvbl1 Tip49 Tip49a	1	17	17	17	323.31	549	102580000	8.01106	3077300000	9.48817	197240000	218320000	270830000	169420000	171050000	112350000	300410000	328300000	277570000	271220000	364930000	395670000	549	10014000	10943000	9252400	9040600	12164000	13189000	6574600	7277300	9027600	5647300	5701600	3744900	8940000	9323500	9790400	9990800	9420300	9142700	7653800	7172400	7973100	7409300	8127500
O35685	NUDC_MOUSE	Nuclear migration protein nudC (Nuclear distribution protein C homolog) (Silica-induced gene 92 protein) (SIG-92)	Nudc	1	19	19	19	71.174	550	102180000	8.00937	2656600000	9.42433	203050000	181540000	137550000	128730000	105230000	60768000	305880000	304260000	229460000	246690000	350740000	402680000	550	11765000	11702000	8825400	9487900	13490000	15488000	7809800	6982400	5290400	4951000	4047400	2337200	8878000	8890800	9158100	7502200	7608700	6449200	5245000	5064100	6271100	4704200	5148600
P63325	RS10_MOUSE	40S ribosomal protein S10	Rps10	1	7	7	7	22.546	551	101790000	8.00771	1730400000	9.23815	155650000	115000000	71735000	86962000	39647000	43919000	234170000	318840000	211120000	131250000	141950000	180200000	551	13775000	18756000	12419000	7720500	8349800	10600000	9156100	6764700	4219700	5115400	2332200	2583500	8598400	9338000	6717000	3992600	3634700	3816800	3182500	3635700	3416100	3074200	2305100
P97467	AMD_MOUSE	Peptidyl-glycine alpha-amidating monooxygenase (PAM) [Includes: Peptidylglycine alpha-hydroxylating monooxygenase (PHM) (EC 1.14.17.3); Peptidyl-alpha-hydroxyglycine alpha-amidating lyase (EC 4.3.2.5) (Peptidylamidoglycolate lyase) (PAL)]	Pam	1	30	30	30	170.32	552	99987000	7.99994	6099200000	9.78527	871790000	756360000	666710000	330960000	799880000	391320000	104310000	115550000	109360000	523820000	595240000	833880000	552	1710100	1894300	1792800	8587300	9758000	13670000	14292000	12399000	10930000	5425600	13113000	6415000	5039200	5221200	5434800	15616000	15741000	19195000	22336000	25743000	21215000	16367000	35325000
P02468	LAMC1_MOUSE	Laminin subunit gamma-1 (Laminin B2 chain) (Laminin-1 subunit gamma) (Laminin-10 subunit gamma) (Laminin-11 subunit gamma) (Laminin-2 subunit gamma) (Laminin-3 subunit gamma) (Laminin-4 subunit gamma) (Laminin-6 subunit gamma) (Laminin-7 subunit gamma) (Laminin-8 subunit gamma) (Laminin-9 subunit gamma) (S-laminin subunit gamma) (S-LAM gamma)	Lamc1 Lamb-2 Lamc-1	1	46	46	46	323.31	553	99333000	7.99709	10033000000	10.0014	973310000	909450000	723310000	537170000	479920000	310950000	1003800000	1035500000	1000600000	617890000	1092100000	1348700000	553	9938200	10252000	9906700	6117700	10813000	13353000	9636700	9004400	7161500	5318500	4751700	3078700	28614000	32177000	29615000	22029000	28280000	30580000	28045000	30168000	27449000	26255000	22639000
P56399	UBP5_MOUSE	Ubiquitin carboxyl-terminal hydrolase 5 (EC 3.4.19.12) (Deubiquitinating enzyme 5) (Isopeptidase T) (Ubiquitin thioesterase 5) (Ubiquitin-specific-processing protease 5)	Usp5 Isot	1	32	32	31	190.13	554	99223000	7.99661	4961100000	9.69558	354100000	373340000	309150000	315740000	293740000	252590000	423880000	445870000	344050000	488250000	603290000	757100000	554	8477500	8917400	6880900	9764900	12066000	15142000	7081900	7466800	6183100	6314800	5874700	5051700	13245000	14537000	13288000	15961000	16317000	16566000	11286000	11956000	12497000	13941000	13730000
Q8JZQ9	EIF3B_MOUSE	Eukaryotic translation initiation factor 3 subunit B (eIF3b) (Eukaryotic translation initiation factor 3 subunit 9) (eIF-3-eta) (eIF3 p116)	Eif3b Eif3s9	1	26	26	26	262.08	555	98878000	7.9951	4943900000	9.69407	365300000	403740000	412670000	159820000	173440000	113260000	657490000	591020000	556180000	389000000	505700000	616260000	555	13150000	11820000	11124000	7780100	10114000	12325000	7305900	8074900	8253400	3196500	3468700	2265200	18688000	18617000	17885000	13048000	13073000	12977000	12957000	11800000	13406000	9228500	9123500
Q8K1L5	PP1RB_MOUSE	E3 ubiquitin-protein ligase PPP1R11 (EC 2.3.2.27) (Protein phosphatase 1 regulatory subunit 11) (T-complex testis expressed protein 5) (Tctex-5)	Ppp1r11 Tctex5	1	3	3	3	18.616	556	97139000	7.98739	388560000	8.58946	0	3026900	27843000	25681000	30466000	19098000	32175000	52528000	33120000	44879000	60021000	59720000	556	8043700	13132000	8280000	11220000	15005000	14930000	0	756730	6960800	6420300	7616500	4774400	1251600	1235600	1325400	1515200	1558000	1316900	0	0	0	1270700	1343700
Q8VCN5	CGL_MOUSE	Cystathionine gamma-lyase (EC 4.4.1.1) (Cysteine-protein sulfhydrase) (Gamma-cystathionase)	Cth	1	16	16	16	238.49	557	96947000	7.98653	2423700000	9.38448	179690000	178270000	158320000	101510000	114560000	69339000	206680000	211550000	192420000	201420000	351960000	457960000	557	8267200	8462000	7696800	8056600	14078000	18319000	7187700	7130900	6332800	4060500	4582200	2773600	6398900	6978600	6383400	7584900	8160000	9042600	5486400	5196700	6324700	4698500	5693700
P46935	NEDD4_MOUSE	E3 ubiquitin-protein ligase NEDD4 (EC 2.3.2.26) (HECT-type E3 ubiquitin transferase NEDD4) (Neural precursor cell expressed developmentally down-regulated protein 4) (NEDD-4)	Nedd4 Kiaa0093 Nedd-4 Nedd4-1 Nedd4a	1	34	34	31	262.93	558	96229000	7.98331	5196400000	9.7157	359850000	323990000	342780000	233000000	315190000	187490000	540960000	536810000	489720000	564370000	565820000	713180000	558	10018000	9941000	9069000	10451000	10478000	13207000	6663800	5999800	6347800	4314900	5836900	3472100	17035000	17378000	16985000	16583000	15940000	16929000	10688000	11323000	12950000	10547000	13466000
Q9R0B9	PLOD2_MOUSE	Procollagen-lysine,2-oxoglutarate 5-dioxygenase 2 (EC 1.14.11.4) (Lysyl hydroxylase 2) (LH2)	Plod2	1	27	27	27	178.5	559	96055000	7.98252	4994900000	9.69853	562210000	613370000	597690000	988780000	417810000	422630000	10038000	14493000	17008000	294040000	493250000	563530000	559	193050	278710	327080	5654700	9485700	10837000	10812000	11796000	11494000	19015000	8034800	8127400	311620	519520	569270	7224800	16561000	12360000	17757000	19907000	19203000	36643000	14651000
P63330	PP2AA_MOUSE	Serine/threonine-protein phosphatase 2A catalytic subunit alpha isoform (PP2A-alpha) (EC 3.1.3.16)	Ppp2ca	1	13	13	1	238.39	560	95386000	7.97948	2003100000	9.3017	171200000	185550000	145760000	94754000	69749000	71146000	249020000	207980000	199350000	126710000	214130000	267760000	560	11858000	9904000	9493000	6033600	10197000	12750000	8152300	8835700	6941000	4512100	3321400	3387900	7078800	6387200	7014200	5257200	5926000	5729600	4693900	4222300	3883600	4113100	4326800
Q99KV1	DJB11_MOUSE	DnaJ homolog subfamily B member 11 (APOBEC1-binding protein 2) (ABBP-2) (ER-associated DNAJ) (ER-associated Hsp40 co-chaperone) (Endoplasmic reticulum DNA J domain-containing protein 3) (ER-resident protein ERdj3) (ERdj3) (ERj3p)	Dnajb11	1	14	14	14	122.51	561	95126000	7.9783	2092800000	9.32073	158940000	144890000	172300000	238640000	203080000	145150000	178660000	162720000	166290000	120600000	180830000	220670000	561	8120900	7396300	7558600	5481900	8219400	10030000	7224700	6585700	7831700	10847000	9230900	6597600	5570400	5735800	5830800	4722400	5427100	4977500	5115400	4654200	5472700	9226700	9087100
Q9D1X0	NOL3_MOUSE	Nucleolar protein 3 (Apoptosis repressor with CARD)	Nol3 Arc	1	4	4	4	18.32	562	94930000	7.9774	949300000	8.9774	71156000	102570000	73894000	90026000	80044000	67848000	41852000	42380000	46158000	69150000	105160000	159060000	562	4185200	4238000	4615800	6915000	10516000	15906000	7115600	10257000	7389400	9002600	8004400	6784800	2297300	1830200	2110500	2612300	3466400	4043800	1817900	2666300	2174000	3259100	3428900
P51150	RAB7A_MOUSE	Ras-related protein Rab-7a	Rab7a Rab7	1	9	9	9	146.1	563	94877000	7.97716	1707800000	9.23244	241660000	252480000	186650000	60148000	123480000	71932000	63452000	66557000	67621000	142440000	160330000	271040000	563	3525100	3697600	3756700	7913200	8907200	15058000	13426000	14027000	10370000	3341600	6859900	3996200	2792400	2835000	2872800	5041700	4518300	5550900	6010900	5885900	5457200	2883200	5805000
Q9QUR6	PPCE_MOUSE	Prolyl endopeptidase (PE) (EC 3.4.21.26) (Post-proline cleaving enzyme)	Prep Pep	1	30	30	30	193.49	564	94725000	7.97646	4925700000	9.69247	283760000	268710000	239130000	119170000	112350000	96235000	684490000	711020000	462240000	472620000	754290000	721680000	564	13163000	13673000	8889200	9088900	14506000	13878000	5456900	5167400	4598600	2291800	2160500	1850700	18431000	19373000	16048000	14858000	17821000	15715000	10366000	8964500	10789000	6624100	6909500
Q9WVH9	FBLN5_MOUSE	Fibulin-5 (FIBL-5) (Developmental arteries and neural crest EGF-like protein) (Dance)	Fbln5 Dance	1	11	11	11	138.97	565	94467000	7.97528	2172700000	9.337	321110000	327080000	247750000	302510000	117420000	139060000	69756000	30932000	38389000	109200000	154780000	314740000	565	3032900	1344900	1669100	4748000	6729500	13685000	13961000	14221000	10772000	13153000	5105200	6045900	2068300	1512200	1774800	4891800	5135600	7291700	8667500	7669400	7770400	11550000	6345700
Q99K48	NONO_MOUSE	Non-POU domain-containing octamer-binding protein (NonO protein)	Nono	1	20	19	19	199.74	566	94400000	7.97497	3304000000	9.51904	253770000	183790000	289550000	124400000	143170000	116540000	494290000	440250000	460970000	272430000	227340000	297490000	566	14122000	12578000	13171000	7783600	6495300	8499700	7250400	5251300	8272900	3554400	4090600	3329900	12165000	11053000	13369000	9214200	8950400	8872200	8938500	6578000	8207100	6875600	7565800
Q9Z2W0	DNPEP_MOUSE	Aspartyl aminopeptidase (EC 3.4.11.21)	Dnpep	1	16	16	16	69.635	567	93351000	7.97012	2707200000	9.43252	231380000	291750000	250820000	171870000	110590000	99976000	176810000	165980000	146540000	257080000	341520000	462870000	567	6096800	5723500	5053000	8864800	11777000	15961000	7978500	10060000	8649000	5926400	3813400	3447400	6951200	5800000	6143200	8009300	9013900	9356800	6580600	6801200	6954400	7175900	6762400
Q8R081	HNRPL_MOUSE	Heterogeneous nuclear ribonucleoprotein L (hnRNP L)	Hnrnpl Hnrpl	1	16	16	16	109.49	568	93035000	7.96865	2605000000	9.41581	277760000	220360000	208960000	121180000	62991000	43331000	331810000	353830000	337930000	230330000	181860000	234620000	568	11850000	12637000	12069000	8226000	6495100	8379400	9920100	7870000	7462900	4327900	2249700	1547500	10303000	10201000	10456000	7378000	5641800	5257800	7634800	6367600	8265400	5205100	4054200
Q8BP92	RCN2_MOUSE	Reticulocalbin-2 (Taipoxin-associated calcium-binding protein 49) (TCBP-49)	Rcn2	1	14	14	14	138.13	569	93000000	7.96848	1674000000	9.22376	57949000	82732000	77687000	500070000	286030000	177070000	87876000	68218000	56521000	42884000	120610000	115360000	569	4882000	3789900	3140100	2382400	6700500	6408600	3219400	4596200	4315900	27781000	15891000	9837100	3823500	3600100	4049800	1995000	4536700	4433800	3614700	3914700	3854400	13673000	11134000
P59999	ARPC4_MOUSE	Actin-related protein 2/3 complex subunit 4 (Arp2/3 complex 20 kDa subunit) (p20-ARC)	Arpc4 Arc20	1	7	7	7	27.843	570	92925000	7.96813	1486800000	9.17225	108790000	158400000	128480000	117320000	95448000	84679000	137070000	98230000	89567000	115960000	136320000	216550000	570	8566600	6139400	5597900	7247700	8520000	13534000	6799600	9900100	8029800	7332300	5965500	5292500	4539700	3369100	3731800	4578300	3677600	4516400	3034100	4487000	4843800	4598500	3899900
Q99JI4	PSMD6_MOUSE	26S proteasome non-ATPase regulatory subunit 6 (26S proteasome regulatory subunit RPN7) (26S proteasome regulatory subunit S10) (p42A)	Psmd6	1	21	21	21	76.816	571	92808000	7.96759	2877100000	9.45895	290020000	276300000	255980000	144390000	143990000	106090000	247970000	225220000	218790000	261250000	289770000	417290000	571	7999100	7265100	7057700	8427400	9347500	13461000	9355300	8912800	8257300	4657800	4644800	3422100	8388300	8824500	8277300	7644400	8637300	8868400	7353300	7638400	7269200	6301000	7356200
Q9JJH1	RNAS4_MOUSE	Ribonuclease 4 (RNase 4) (EC 3.1.27.-)	Rnase4	1	7	7	7	94.557	572	92221000	7.96483	1014400000	9.00621	94519000	125150000	112660000	216110000	192270000	72790000	17585000	5324000	14538000	50961000	17207000	95314000	572	1598600	484000	1321700	4632800	1564300	8664900	8592600	11377000	10242000	19646000	17479000	6617300	1175700	0	764830	1819800	1070200	2216600	2718400	2939600	4211100	9464400	6661100
P47753	CAZA1_MOUSE	F-actin-capping protein subunit alpha-1 (CapZ alpha-1)	Capza1 Cappa1	1	12	12	8	70.463	573	91921000	7.96341	2022300000	9.30585	124830000	133340000	136990000	120360000	97670000	75848000	210410000	172590000	179110000	245130000	232020000	293970000	573	9564300	7845000	8141600	11142000	10546000	13362000	5674200	6060900	6226700	5470700	4439500	3447600	5552400	5394100	5638600	7011300	6743800	6338900	5467300	4818000	5250000	4846500	4958600
Q8BP67	RL24_MOUSE	60S ribosomal protein L24	Rpl24	1	5	5	5	17.722	574	91257000	7.96027	912570000	8.96027	43931000	45431000	49074000	15530000	37399000	13515000	159720000	154210000	136870000	57471000	96265000	103160000	574	15972000	15421000	13687000	5747100	9626500	10316000	4393100	4543100	4907400	1553000	3739900	1351500	5442100	5342600	5165600	1795100	1633000	1398400	1797400	1804300	2160600	923760	937070
Q9WVA2	TIM8A_MOUSE	Mitochondrial import inner membrane translocase subunit Tim8 A (Deafness dystonia protein 1 homolog)	Timm8a1 Ddp1 Tim8a Timm8a	1	4	4	4	48.654	575	91180000	7.9599	547080000	8.73805	11000000	43396000	36035000	62295000	70297000	30265000	52173000	33960000	57031000	42910000	42923000	64794000	575	8695500	5660000	9505200	7151600	7153800	10799000	1833300	7232700	6005900	10382000	11716000	5044200	1528200	1660400	1616200	1720200	1877000	1598100	0	1162400	1008500	2706600	3053700
Q6ZQ38	CAND1_MOUSE	Cullin-associated NEDD8-dissociated protein 1 (Cullin-associated and neddylation-dissociated protein 1) (p120 CAND1)	Cand1 D10Ertd516e Kiaa0829	2	41	41	41	215.06	576	90910000	7.95861	6909100000	9.83942	503810000	607120000	529800000	486520000	390090000	310440000	619900000	596780000	536320000	683640000	759590000	885110000	576	8156600	7852400	7056800	8995200	9994700	11646000	6629100	7988400	6971100	6401500	5132800	4084800	19668000	19438000	18657000	21417000	20530000	21484000	16624000	19415000	17973000	19711000	17056000
Q9QZD9	EIF3I_MOUSE	Eukaryotic translation initiation factor 3 subunit I (eIF3i) (Eukaryotic translation initiation factor 3 subunit 2) (TGF-beta receptor-interacting protein 1) (TRIP-1) (eIF-3-beta) (eIF3 p36)	Eif3i Eif3s2 Trip1	1	12	12	12	168.68	577	90490000	7.9566	2081300000	9.31833	210300000	176490000	169340000	50590000	58080000	25852000	294480000	186090000	291840000	206040000	235750000	176410000	577	12804000	8091000	12689000	8958200	10250000	7669900	9143400	7673400	7362700	2199600	2525200	1124000	7266200	7712400	7916300	5480700	5443600	5245900	5820600	4734500	5765300	3218300	3346700
Q61468	MSLN_MOUSE	Mesothelin (Pre-pro-megakaryocyte-potentiating factor) [Cleaved into: Megakaryocyte-potentiating factor (MPF); Mesothelin, cleaved form]	Msln Mes Mpf	1	15	15	15	115.47	578	90161000	7.95502	3155600000	9.49908	589410000	579140000	480190000	315240000	186780000	173890000	11972000	15159000	23319000	183600000	244550000	352380000	578	342070	433110	666250	5245700	6987000	10068000	16840000	16547000	13720000	9006700	5336600	4968200	561580	984520	1314400	6309000	6792900	8401200	18885000	16573000	14587000	13488000	6467100
O55029	COPB2_MOUSE	Coatomer subunit beta' (Beta'-coat protein) (Beta'-COP) (p102)	Copb2	1	32	32	32	126.4	579	90081000	7.95463	5044500000	9.70282	373830000	382140000	445490000	228870000	226430000	169920000	436350000	547200000	439490000	477490000	639550000	677770000	579	7792000	9771400	7848100	8526600	11421000	12103000	6675600	6824000	7955100	4086900	4043400	3034300	13684000	14632000	14797000	14878000	15979000	13686000	11116000	10688000	12708000	11746000	13177000
Q922B2	SYDC_MOUSE	Aspartate--tRNA ligase, cytoplasmic (EC 6.1.1.12) (Aspartyl-tRNA synthetase) (AspRS)	Dars	1	24	24	24	171.21	580	90015000	7.95431	3780600000	9.57756	354740000	368820000	466210000	405850000	270850000	257460000	62440000	78702000	141530000	337950000	518260000	517830000	580	1486700	1873900	3369700	8046500	12339000	12329000	8446200	8781400	11100000	9663000	6448800	6130000	4783200	6037400	6109400	12482000	13111000	11950000	11251000	10766000	11944000	15780000	12132000
P60229	EIF3E_MOUSE	Eukaryotic translation initiation factor 3 subunit E (eIF3e) (Eukaryotic translation initiation factor 3 subunit 6) (MMTV integration site 6) (Mammary tumor-associated protein INT-6) (Viral integration site protein INT-6) (eIF-3 p48)	Eif3e Eif3s6 Int6	1	21	21	21	175.12	581	89871000	7.95362	2965700000	9.47213	205120000	118960000	246720000	114820000	108060000	74075000	430790000	407100000	386490000	228900000	299930000	344770000	581	13054000	12336000	11712000	6936500	9088700	10448000	6215900	3604800	7476500	3479400	3274500	2244700	12037000	11786000	12826000	7396700	7842900	7460000	7026600	7134200	7498300	5245900	5433200
Q99MN1	SYK_MOUSE	Lysine--tRNA ligase (EC 2.7.7.-) (EC 6.1.1.6) (Lysyl-tRNA synthetase) (LysRS)	Kars	1	23	23	23	267.57	582	89670000	7.95265	3228100000	9.50895	231070000	202510000	207260000	166210000	148060000	119970000	378330000	360940000	372910000	286280000	360160000	394440000	582	10509000	10026000	10359000	7952100	10005000	10957000	6418600	5625100	5757200	4617000	4112800	3332500	10786000	11263000	11629000	9168100	10640000	9655000	6523100	7197200	8000500	6979900	7022500
O88968	TCO2_MOUSE	Transcobalamin-2 (TC-2) (Transcobalamin II) (TC II) (TCII)	Tcn2	1	14	14	14	217.06	583	89558000	7.9521	2328500000	9.36708	396650000	381190000	336860000	91851000	203500000	62230000	31400000	6645700	19604000	203440000	246660000	348490000	583	1207700	255600	754000	7824700	9486900	13404000	15256000	14661000	12956000	3532700	7826800	2393500	1358900	0	1856500	5954800	6399300	7673500	11150000	11071000	12021000	4212300	8375900
Q8BK62	OLFL3_MOUSE	Olfactomedin-like protein 3	Olfml3	1	13	13	13	323.31	584	89425000	7.95146	1967400000	9.29389	285100000	294960000	197240000	270450000	41619000	59962000	136130000	157280000	131780000	102160000	105540000	185160000	584	6187700	7149100	5990100	4643600	4797100	8416200	12959000	13407000	8965300	12293000	1891800	2725600	4851300	5433900	5580800	4420100	4003900	4969300	6786000	7264100	6158700	9783000	2509000
P46638	RB11B_MOUSE	Ras-related protein Rab-11B	Rab11b	2	11	11	11	101.07	585	89330000	7.951	1697300000	9.22976	140020000	158450000	162530000	128900000	112520000	92532000	127720000	124580000	118870000	150850000	174240000	206050000	585	6722300	6556900	6256200	7939400	9170500	10845000	7369500	8339400	8554200	6784300	5922300	4870100	5091800	3809600	4217100	4526300	5247800	4571100	4450900	5389400	6592400	4809400	4404600
P70274	SEPP1_MOUSE	Selenoprotein P (SeP) (Plasma selenoprotein P)	Selenop Selp Sepp1	1	4	4	4	84.625	586	89206000	7.95039	2141000000	9.33062	237840000	279450000	233920000	81868000	100760000	43060000	235510000	283410000	155660000	107620000	123660000	247370000	586	9812900	11809000	6485700	4484200	5152600	10307000	9909900	11644000	9746600	3411200	4198300	1794200	0	0	0	0	0	5618500	7252500	7827400	5689200	0	0
P16254	SRP14_MOUSE	Signal recognition particle 14 kDa protein (SRP14)	Srp14	1	4	4	4	38.291	587	89027000	7.94952	623190000	8.79462	28954000	40643000	27738000	35342000	30560000	26122000	91283000	103040000	86223000	42518000	64740000	46029000	587	13040000	14720000	12318000	6073900	9248600	6575500	4136400	5806200	3962500	5048900	4365800	3731700	2240100	2948000	2646100	1412500	1653700	875020	1832200	2103600	1853600	1097600	1455600
P13609	SRGN_MOUSE	Serglycin (Mastocytoma proteoglycan core protein) (Secretory granule proteoglycan core protein) (gp600)	Srgn Prg Prg1	1	3	3	3	19.208	588	88301000	7.94597	529810000	8.72412	32603000	35417000	17103000	82434000	85273000	46968000	14795000	18158000	19437000	45123000	68837000	63661000	588	2465800	3026400	3239500	7520500	11473000	10610000	5433800	5902900	2850600	13739000	14212000	7827900	0	0	913370	1467400	1868600	1873200	0	1170900	0	3543300	3804000
Q9QYR9	ACOT2_MOUSE	Acyl-coenzyme A thioesterase 2, mitochondrial (Acyl-CoA thioesterase 2) (EC 3.1.2.2) (Acyl coenzyme A thioester hydrolase) (MTE-I) (Very-long-chain acyl-CoA thioesterase)	Acot2 Mte1	6	14	14	14	61.554	589	88263000	7.94578	2559600000	9.40817	163320000	189760000	185450000	307790000	325080000	192210000	120670000	110810000	154420000	219510000	254010000	336590000	589	4161000	3821000	5324800	7569100	8758900	11607000	5631800	6543400	6395000	10613000	11210000	6627800	4748400	4421900	5311700	7417400	7244100	8612700	5591100	6105000	6117200	12561000	14220000
P49962	SRP09_MOUSE	Signal recognition particle 9 kDa protein (SRP9)	Srp9	1	5	5	5	24.029	590	87980000	7.94438	703840000	8.84747	42196000	50888000	23189000	44469000	44958000	22907000	60050000	149590000	103140000	52316000	43993000	66145000	590	7506200	18699000	12893000	6539500	5499200	8268100	5274500	6361000	2898600	5558600	5619800	2863400	2631100	3204200	2420900	1618400	1786700	2334100	0	2387600	0	2235100	2090800
Q62318	TIF1B_MOUSE	Transcription intermediary factor 1-beta (TIF1-beta) (E3 SUMO-protein ligase TRIM28) (EC 2.3.2.27) (KRAB-A-interacting protein) (KRIP-1) (RING-type E3 ubiquitin transferase TIF1-beta) (Tripartite motif-containing protein 28)	Trim28 Kap1 Krip1 Tif1b	1	24	24	24	252.53	591	87594000	7.94247	3766500000	9.57594	367570000	325920000	313760000	224380000	297670000	205540000	312980000	278220000	339040000	296010000	332700000	472740000	591	7278600	6470100	7884700	6884000	7737200	10994000	8548200	7579500	7296800	5218200	6922500	4780000	12360000	10276000	12984000	9056100	11057000	10914000	9938600	9546400	10604000	8815200	11372000
Q61206	PA1B2_MOUSE	Platelet-activating factor acetylhydrolase IB subunit beta (EC 3.1.1.47) (PAF acetylhydrolase 30 kDa subunit) (PAF-AH 30 kDa subunit) (PAF-AH subunit beta) (PAFAH subunit beta)	Pafah1b2 Pafahb	1	8	8	8	134.74	592	86835000	7.93869	1215700000	9.08483	101330000	90561000	100330000	67524000	72311000	58930000	83212000	99703000	75383000	108440000	145550000	212420000	592	5943700	7121700	5384500	7745500	10396000	15173000	7237900	6468700	7166300	4823100	5165100	4209300	3326300	3164000	2566900	3867600	3936400	4259600	3243500	3119300	3114800	3223600	3207200
P02469	LAMB1_MOUSE	Laminin subunit beta-1 (Laminin B1 chain) (Laminin-1 subunit beta) (Laminin-10 subunit beta) (Laminin-12 subunit beta) (Laminin-2 subunit beta) (Laminin-6 subunit beta) (Laminin-8 subunit beta)	Lamb1 Lamb-1 Lamb1-1	1	51	51	51	323.31	593	86192000	7.93547	9222600000	9.96485	733420000	727420000	706330000	643460000	553300000	334080000	807090000	856220000	885230000	701620000	989330000	1285100000	593	7542900	8002100	8273200	6557200	9246100	12010000	6854400	6798300	6601200	6013700	5171000	3122200	25836000	29858000	29479000	21067000	24268000	28002000	22484000	25498000	24729000	28399000	23896000
Q8BJU0	SGTA_MOUSE	Small glutamine-rich tetratricopeptide repeat-containing protein alpha (Alpha-SGT)	Sgta Sgt	1	7	7	7	27.263	594	86061000	7.93481	1290900000	9.11089	113860000	91296000	80716000	35086000	65887000	25797000	114100000	146430000	132050000	106000000	174330000	205370000	594	7606600	9761800	8803100	7066900	11622000	13691000	7590400	6086400	5381100	2339000	4392500	1719800	2983600	2961000	3568800	5055000	4085100	4357100	2436800	2442300	2609300	3759500	4441500
Q7TQK5	CCD93_MOUSE	Coiled-coil domain-containing protein 93	Ccdc93	1	3	3	3	2.111	595	85898000	7.93398	4380800000	9.64155	695230000	652830000	597280000	93843000	144130000	60566000	348370000	418470000	374150000	191470000	272710000	531700000	595	6830800	8205300	7336200	3754200	5347300	10425000	13632000	12801000	11711000	1840100	2826200	1187600	0	0	0	0	0	11952000	0	0	0	0	0
Q9D1J3	SARNP_MOUSE	SAP domain-containing ribonucleoprotein (Nuclear protein Hcc-1)	Sarnp Hcc1	1	6	6	6	77.334	596	85682000	7.93289	1456600000	9.16334	136970000	146550000	158390000	77546000	52066000	55335000	137910000	120750000	122660000	132470000	145640000	170310000	596	8112400	7103100	7215100	7792100	8567200	10018000	8057000	8620600	9317200	4561500	3062700	3255000	4161200	4131800	4403100	4158800	4386100	3760200	3895700	3791800	4573300	3567400	3369100
Q9D0K2	SCOT1_MOUSE	Succinyl-CoA:3-ketoacid coenzyme A transferase 1, mitochondrial (EC 2.8.3.5) (3-oxoacid CoA-transferase 1) (Somatic-type succinyl-CoA:3-oxoacid CoA-transferase) (SCOT-s)	Oxct1 Oxct Scot	1	16	16	16	284.76	597	85519000	7.93206	2736600000	9.43721	125450000	97826000	79821000	456300000	373320000	276890000	194990000	202100000	253720000	178050000	192670000	305500000	597	6093600	6315500	7928600	5564000	6020900	9546800	3920200	3057100	2494400	14259000	11666000	8652900	6955800	6988600	8524300	6297200	7381900	7447500	4951700	5071700	4388400	16291000	14757000
Q9CX86	ROA0_MOUSE	Heterogeneous nuclear ribonucleoprotein A0 (hnRNP A0)	Hnrnpa0 Hnrpa0	1	5	5	5	16.645	598	85270000	7.9308	1449600000	9.16125	146990000	181360000	151150000	55830000	68269000	49162000	126950000	135110000	125420000	98590000	146820000	163940000	598	7467900	7947400	7377800	5799400	8636400	9643400	8646400	10668000	8891400	3284100	4015800	2891900	3784100	4153200	4071600	2921800	3916100	3532800	3453600	3777500	3359200	2086200	2837300
Q9Z1E4	GYS1_MOUSE	Glycogen [starch] synthase, muscle (EC 2.4.1.11)	Gys1 Gys Gys3	2	28	28	28	169.12	599	85218000	7.93053	3920000000	9.59329	426720000	493160000	422500000	314450000	308310000	204250000	59523000	112440000	96323000	364140000	532060000	586190000	599	1294000	2444300	2094000	7916000	11567000	12743000	9276400	10721000	9184700	6835800	6702300	4440100	4271500	4866500	4610600	13127000	13672000	11417000	10953000	11963000	10624000	15223000	15052000
O70475	UGDH_MOUSE	UDP-glucose 6-dehydrogenase (UDP-Glc dehydrogenase) (UDP-GlcDH) (UDPGDH) (EC 1.1.1.22)	Ugdh	1	20	20	20	98.472	600	85010000	7.92947	3145400000	9.49768	403510000	458540000	413880000	212610000	97820000	107290000	199750000	169310000	163340000	292410000	326830000	300080000	600	5398700	4575900	4414600	7902800	8833300	8110200	10906000	12393000	11186000	5746300	2643800	2899700	6938100	7379500	6324600	8577300	9312600	7606100	11427000	11129000	12304000	8139800	6224500
Q91V92	ACLY_MOUSE	ATP-citrate synthase (EC 2.3.3.8) (ATP-citrate (pro-S-)-lyase) (Citrate cleavage enzyme)	Acly	1	30	30	30	299.05	601	84943000	7.92913	6030900000	9.78038	667680000	571650000	632950000	274890000	237220000	163180000	545550000	533350000	468720000	447810000	696310000	791640000	601	7683800	7511900	6601600	6307200	9807200	11150000	9403900	8051400	8914800	3871700	3341200	2298300	16841000	17271000	17805000	16557000	17773000	17024000	17269000	16916000	17379000	13551000	12425000
Q9Z0J0	NPC2_MOUSE	NPC intracellular cholesterol transporter 2 (Epididymal secretory protein E1) (mE1) (Niemann Pick type C2 protein homolog)	Npc2	1	3	3	3	13.755	602	84926000	7.92904	934190000	8.97044	31874000	32456000	21319000	14336000	21678000	5651400	91419000	178150000	195760000	31792000	133790000	172940000	602	8310800	16195000	17796000	2890100	12163000	15722000	2897700	2950600	1938100	1303200	1970800	513770	3742900	5538700	6012000	770790	3101100	3989900	1888500	1617000	0	571820	913640
Q61001	LAMA5_MOUSE	Laminin subunit alpha-5 (Laminin-10 subunit alpha) (Laminin-11 subunit alpha) (Laminin-15 subunit alpha)	Lama5	1	81	81	81	323.31	603	84283000	7.92574	16604000000	10.2202	1771800000	1675900000	1352100000	1044000000	715340000	586360000	1298900000	1443700000	1348200000	1331100000	1804100000	2224800000	603	6593600	7328700	6843800	6756900	9157700	11293000	8994100	8507200	6863400	5299400	3631200	2976400	43765000	45685000	46937000	41211000	45661000	49560000	46208000	47929000	45205000	48099000	36506000
P14685	PSMD3_MOUSE	26S proteasome non-ATPase regulatory subunit 3 (26S proteasome regulatory subunit RPN3) (26S proteasome regulatory subunit S3) (Proteasome subunit p58) (Transplantation antigen P91A) (Tum-P91A antigen)	Psmd3 P91a Tstap91a	1	27	27	27	96.619	604	84080000	7.92469	3783600000	9.57791	389390000	357270000	310890000	147970000	140580000	116460000	329370000	331760000	341750000	339670000	453150000	525330000	604	7319400	7372500	7594400	7548300	10070000	11674000	8653000	7939400	6908600	3288300	3124000	2588000	11186000	11447000	11860000	11027000	11382000	10311000	8921600	10273000	10253000	7967100	7727300
Q9ERK4	XPO2_MOUSE	Exportin-2 (Exp2) (Chromosome segregation 1-like protein) (Importin-alpha re-exporter)	Cse1l Xpo2	1	33	33	33	323.31	605	83824000	7.92337	5197100000	9.71576	258050000	299320000	255270000	869800000	125930000	120800000	440110000	432990000	660860000	541370000	720800000	471790000	605	7098500	6983700	10659000	8731700	11626000	7609500	4162000	4827800	4117300	14029000	2031100	1948400	19794000	19456000	17867000	16562000	15994000	15225000	13321000	13283000	13488000	9692000	9031200
P97855	G3BP1_MOUSE	Ras GTPase-activating protein-binding protein 1 (G3BP-1) (EC 3.6.4.12) (EC 3.6.4.13) (ATP-dependent DNA helicase VIII) (GAP SH3 domain-binding protein 1) (HDH-VIII)	G3bp1 G3bp	1	15	15	14	55.241	606	83432000	7.92133	2503000000	9.39846	199420000	171550000	205430000	80598000	112930000	67511000	316910000	289140000	300140000	199720000	247530000	311790000	606	10564000	9637900	10005000	6657300	8250900	10393000	6647300	5718500	6847800	2686600	3764200	2250400	9613100	9123700	9209100	6009200	6623300	6153300	5033400	5396600	5399500	4519200	5047100
P24288	BCAT1_MOUSE	Branched-chain-amino-acid aminotransferase, cytosolic (BCAT(c)) (EC 2.6.1.42) (Protein ECA39)	Bcat1 Eca39	1	10	10	10	170.58	607	83223000	7.92024	1664500000	9.22128	53436000	43467000	117320000	2604200	0	6401100	359500000	363880000	287390000	21293000	233720000	175100000	607	17975000	18194000	14369000	1064600	11686000	8754900	2671800	2173400	5865900	130210	0	320050	10020000	9358100	8870500	1282400	6191600	4902100	2791200	2103900	3770800	0	0
Q9CQM5	TXD17_MOUSE	Thioredoxin domain-containing protein 17 (14 kDa thioredoxin-related protein) (TRP14) (Protein 42-9-9) (Thioredoxin-like protein 5)	Txndc17 Txnl5	1	4	4	4	15.091	608	82981000	7.91898	829810000	8.91898	68334000	73858000	63427000	48445000	65513000	31960000	74455000	64904000	50486000	55261000	94698000	138470000	608	7445500	6490400	5048600	5526100	9469800	13847000	6833400	7385800	6342700	4844500	6551300	3196000	2492600	2177000	1835600	2485000	2914800	2670400	1914700	1882100	1932800	2080800	2870000
P11627	L1CAM_MOUSE	Neural cell adhesion molecule L1 (N-CAM-L1) (NCAM-L1) (CD antigen CD171)	L1cam Caml1	1	30	30	30	323.31	609	82905000	7.91858	6300800000	9.7994	992090000	923260000	631140000	323380000	615120000	333270000	112850000	81886000	91901000	451890000	703190000	1040800000	609	1484900	1077400	1209200	5945900	9252500	13695000	13054000	12148000	8304400	4255000	8093700	4385100	5090000	4001100	4774300	14516000	17837000	22721000	27235000	29372000	23240000	12989000	25309000
Q922B9	SSFA2_MOUSE	Protein ITPRID2 (ITPR-interacting domain-containing protein 2) (Ki-ras-induced actin-interacting protein) (Sperm-specific antigen 2 homolog)	Itprid2 Kiaa1927 Krap Ssfa2	1	2	2	2	-2	610	82463000	7.91626	6102300000	9.78549	0	0	0	0	7693400	2528600	0	0	0	10875000	0	0	610	0	0	0	146960	0	0	0	0	0	0	103970	34171	0	0	0	394950	0	0	0	0	0	0	0
Q9CQH7	BT3L4_MOUSE	Transcription factor BTF3 homolog 4 (Basic transcription factor 3-like 4)	Btf3l4	1	6	6	6	52.525	611	82371000	7.91577	906080000	8.95717	69186000	111210000	55184000	32511000	63353000	41560000	48185000	18846000	75200000	121990000	129110000	139760000	611	4380400	1713300	6836400	11090000	11737000	12705000	6289600	10110000	5016800	2955600	5759300	3778200	1974800	2252200	2130300	3494900	3479400	2264300	2405000	2276000	2747400	2201700	2734700
Q91V64	ISOC1_MOUSE	Isochorismatase domain-containing protein 1	Isoc1	1	8	8	8	49.146	612	82342000	7.91562	1482200000	9.17091	185850000	161160000	170240000	115330000	83326000	75776000	58327000	66975000	66954000	143660000	141770000	212790000	612	3240400	3720800	3719700	7981300	7876300	11821000	10325000	8953400	9457800	6407000	4629200	4209800	2486600	2981900	3089900	4123900	4569300	4844100	5221900	4340500	5131700	4150100	4257900
Q99LS3	SERB_MOUSE	Phosphoserine phosphatase (PSP) (PSPase) (EC 3.1.3.3) (O-phosphoserine phosphohydrolase)	Psph	1	9	9	9	62.114	613	82146000	7.91459	1314300000	9.11869	98416000	66518000	75036000	42654000	45455000	24731000	186900000	189870000	148470000	111890000	117970000	206430000	613	11681000	11867000	9279400	6993000	7373100	12902000	6151000	4157400	4689800	2665900	2840900	1545700	4743200	5320100	4508900	3549700	3169400	4125500	2380900	2189100	2295400	2480100	2039600
P62821	RAB1A_MOUSE	Ras-related protein Rab-1A (YPT1-related protein)	Rab1A Rab1	1	8	8	4	65.344	614	81843000	7.91298	1473200000	9.16826	162070000	118720000	138460000	92371000	88533000	99157000	93479000	115840000	91618000	138290000	174620000	160030000	614	5193300	6435300	5089900	7682700	9701200	8890400	9003900	6595700	7692000	5131700	4918500	5508700	3504600	3294800	3680800	4241100	4790700	4177000	5546100	4346000	4924100	3696300	4013300
Q9WV91	FPRP_MOUSE	Prostaglandin F2 receptor negative regulator (Prostaglandin F2-alpha receptor regulatory protein) (Prostaglandin F2-alpha receptor-associated protein) (CD antigen CD315)	Ptgfrn Fprp	1	32	32	32	305.66	615	81751000	7.91249	4986800000	9.69782	631510000	575820000	458990000	824790000	308190000	354910000	173930000	186520000	202840000	328680000	429400000	511190000	615	2851300	3057800	3325300	5388200	7039300	8380200	10353000	9439600	7524500	13521000	5052400	5818300	7446000	10288000	9368200	10922000	11508000	13096000	19020000	21220000	15895000	28940000	12422000
Q6PB93	GALT2_MOUSE	Polypeptide N-acetylgalactosaminyltransferase 2 (EC 2.4.1.41) (Polypeptide GalNAc transferase 2) (GalNAc-T2) (pp-GaNTase 2) (Protein-UDP acetylgalactosaminyltransferase 2) (UDP-GalNAc:polypeptide N-acetylgalactosaminyltransferase 2) [Cleaved into: Polypeptide N-acetylgalactosaminyltransferase 2 soluble form]	Galnt2	1	22	22	21	151.57	616	81687000	7.91215	3349100000	9.52493	511140000	561370000	409450000	281960000	289120000	155920000	82548000	142560000	155490000	136010000	255780000	365280000	616	2013400	3477100	3792500	3317200	6238600	8909300	12467000	13692000	9986700	6877000	7051800	3802900	4432400	4392900	4866100	5430900	6373800	7399400	14475000	15661000	10755000	12704000	14015000
Q91VU0	FAM3C_MOUSE	Protein FAM3C (Interleukin-like EMT inducer)	Fam3c D6Wsu176e Ilei	1	9	9	9	116.2	617	81506000	7.91119	1548600000	9.18994	240090000	195650000	178100000	152480000	92101000	74646000	86133000	139340000	102360000	49795000	110000000	127910000	617	4533300	7333700	5387400	2620800	5789500	6732300	12636000	10297000	9373800	8025400	4847400	3928800	3376500	3616000	3320300	2501000	3508400	3733100	5976100	5936200	6420000	5855600	4457300
Q8BJ71	NUP93_MOUSE	Nuclear pore complex protein Nup93 (93 kDa nucleoporin) (CBP-interacting protein 4) (Nucleoporin Nup93)	Nup93 Cip4 Kiaa0095	1	6	6	6	6.9629	618	81446000	7.91087	5049700000	9.70327	355360000	282510000	270100000	15686000	130840000	12787000	585070000	550100000	356000000	42995000	250350000	280540000	618	9436600	8872600	5741900	693470	4037900	4524800	5731500	4556700	4356500	253000	2110300	206250	7333200	6415600	5054600	2100600	0	0	0	0	0	1473300	5434900
Q9CPT4	MYDGF_MOUSE	Myeloid-derived growth factor (MYDGF)	Mydgf D17Wsu104e	1	5	5	5	37.219	619	81015000	7.90857	972180000	8.98775	63978000	81713000	69363000	69599000	156050000	15767000	60543000	89561000	72812000	88051000	109490000	95245000	619	5045300	7463400	6067700	7337500	9124500	7937100	5331500	6809400	5780200	5799900	13005000	1313900	2513800	2531900	3475500	2457300	2683800	2425600	2501000	3181500	2721600	2153400	5495800
Q9D819	IPYR_MOUSE	Inorganic pyrophosphatase (EC 3.6.1.1) (Pyrophosphate phospho-hydrolase) (PPase)	Ppa1 Pp Pyp	1	10	10	10	34.441	620	80972000	7.90833	1943300000	9.28854	172050000	123750000	144080000	49873000	197730000	26039000	262350000	288990000	202090000	104640000	173220000	198510000	620	10931000	12041000	8420400	4360000	7217400	8271200	7168600	5156400	6003400	2078000	8238700	1085000	10465000	9473400	9711600	3525600	5868500	5033200	3562100	4306800	3718500	2948900	3044000
Q99LT0	DPY30_MOUSE	Protein dpy-30 homolog (Dpy-30-like protein) (Dpy-30L)	Dpy30	1	5	5	5	19.979	621	80570000	7.90617	563990000	8.75127	25382000	33730000	23321000	19163000	22319000	36297000	22144000	39053000	34764000	101500000	104930000	101390000	621	3163400	5579100	4966200	14500000	14990000	14484000	3626000	4818500	3331600	2737600	3188400	5185300	580610	758180	995350	4862900	1795700	1933800	1641200	0	0	1557300	1844000
P62196	PRS8_MOUSE	26S proteasome regulatory subunit 8 (26S proteasome AAA-ATPase subunit RPT6) (Proteasome 26S subunit ATPase 5) (Proteasome subunit p45) (p45/SUG) (mSUG1)	Psmc5 Sug1	1	14	14	14	132.42	622	80246000	7.90442	2888900000	9.46073	195800000	165930000	691380000	66158000	78319000	33408000	313610000	307910000	453450000	163360000	159760000	259780000	622	8711400	8553000	12596000	4537800	4437700	7216100	5438800	4609100	19205000	1837700	2175500	928000	10083000	8211500	7778700	9619100	7902900	8579600	6854100	6739100	7943400	4804700	5746400
P62814	VATB2_MOUSE	V-type proton ATPase subunit B, brain isoform (V-ATPase subunit B 2) (Endomembrane proton pump 58 kDa subunit) (Vacuolar proton pump subunit B 2)	Atp6v1b2 Atp6b2 Vat2	1	21	21	21	169.75	623	80220000	7.90428	2486800000	9.39564	201560000	167070000	145240000	250620000	208090000	158560000	109750000	75063000	94066000	304300000	372200000	400280000	623	3540400	2421400	3034400	9816100	12006000	12912000	6502000	5389400	4685100	8084700	6712500	5114800	5176400	5671400	4865600	7748100	9250700	8477000	6326500	7423600	6270800	8527500	7571400
Q64105	SPRE_MOUSE	Sepiapterin reductase (SPR) (EC 1.1.1.153)	Spr	1	10	10	10	57.032	624	79818000	7.9021	1356900000	9.13255	119140000	89370000	120560000	69120000	78238000	143730000	101410000	88158000	66003000	156380000	148970000	175820000	624	5965100	5185800	3882500	9199100	8763100	10342000	7008200	5257100	7091900	4065900	4602300	8454600	3429700	3178600	2617300	5007000	4584800	4165200	4055800	3500800	4964600	4128000	4051700
O08583	THOC4_MOUSE	THO complex subunit 4 (Tho4) (Ally of AML-1 and LEF-1) (Aly/REF export factor) (REF1-I) (RNA and export factor-binding protein 1) (Transcriptional coactivator Aly/REF)	Alyref Aly Ref1 Refbp1 THOC4	2	5	5	5	116.85	625	79809000	7.90205	1516400000	9.18081	183080000	168920000	186700000	94823000	106690000	78328000	82200000	83535000	80229000	107970000	137030000	206860000	625	4326300	4396600	4222600	5682800	7212000	10887000	9635900	8890400	9826400	4990700	5615500	4122500	3011200	2699100	3092500	4128300	4328700	4275500	4902400	3748900	5225500	4745800	5058300
P41105	RL28_MOUSE	60S ribosomal protein L28	Rpl28	1	5	5	5	31.855	626	79432000	7.9	953180000	8.97917	20510000	15691000	19340000	44817000	35738000	20389000	208930000	181240000	196140000	107250000	83854000	19284000	626	17411000	15103000	16345000	8937400	6987900	1607000	1709200	1307600	1611700	3734800	2978100	1699000	7887800	6213700	7419600	2306000	1665300	0	0	0	0	1838600	1216000
P54775	PRS6B_MOUSE	26S proteasome regulatory subunit 6B (26S proteasome AAA-ATPase subunit RPT3) (CIP21) (MB67-interacting protein) (MIP224) (Proteasome 26S subunit ATPase 4) (Tat-binding protein 7) (TBP-7)	Psmc4 Tbp7	1	15	15	15	150.34	627	78988000	7.89756	2132700000	9.32893	223280000	192490000	202520000	86341000	79708000	61615000	164700000	162800000	140700000	225750000	239450000	353350000	627	6099800	6029700	5211000	8361100	8868400	13087000	8269600	7129100	7500600	3197800	2952100	2282000	6517200	6259400	6232900	7551700	6259900	6140600	5777900	4989400	6228500	3724400	4445000
O09043	NAPSA_MOUSE	Napsin-A (EC 3.4.23.-) (KDAP-1) (Kidney-derived aspartic protease-like protein) (KAP)	Napsa Kdap Nap	1	5	5	5	31.23	628	78535000	7.89506	1335100000	9.12551	158260000	194400000	147610000	67550000	70381000	59832000	90153000	97599000	64233000	92252000	105730000	187100000	628	5303100	5741100	3778400	5426600	6219400	11006000	9309100	11435000	8683000	3973500	4140100	3519500	2864400	3049300	2468000	3152300	2646400	3669300	3706800	4538000	4019600	3124500	3487900
P98063	BMP1_MOUSE	Bone morphogenetic protein 1 (BMP-1) (EC 3.4.24.19) (Mammalian tolloid protein) (mTld) (Procollagen C-proteinase) (PCP)	Bmp1	2	34	34	31	234.88	629	78419000	7.89442	5724600000	9.75775	579100000	557410000	467540000	78911000	332830000	116660000	397240000	454790000	423550000	615270000	650630000	1050600000	629	5441600	6230000	5802000	8428300	8912800	14392000	7932900	7635800	6404700	1081000	4559300	1598100	11505000	13649000	14729000	17747000	15888000	24299000	17000000	17344000	16484000	5219000	15122000
P62137	PP1A_MOUSE	Serine/threonine-protein phosphatase PP1-alpha catalytic subunit (PP-1A) (EC 3.1.3.16)	Ppp1ca Ppp1a	1	13	5	4	28.811	630	78229000	7.89337	1642800000	9.21558	400150000	59167000	39246000	121630000	102010000	85838000	130030000	149690000	131590000	136280000	225120000	61467000	630	6192000	7127900	6266200	6489600	10720000	2927000	19055000	2817500	1868900	5791900	4857400	4087500	5234900	5734600	5950900	4022100	4476600	4441000	4803500	4146500	3945200	4415200	3633700
Q9WV54	ASAH1_MOUSE	Acid ceramidase (AC) (ACDase) (Acid CDase) (EC 3.5.1.23) (Acylsphingosine deacylase) (N-acylsphingosine amidohydrolase) [Cleaved into: Acid ceramidase subunit alpha; Acid ceramidase subunit beta]	Asah1 Asah	1	13	13	13	78.998	631	78225000	7.89335	2190300000	9.3405	220130000	227120000	198250000	150510000	209290000	117200000	129150000	152750000	134250000	146540000	221340000	283770000	631	4612700	5455400	4794500	5233500	7904800	10135000	7861900	8111400	7080200	5375400	7474800	4185600	5159100	5334800	5563600	3734700	5488900	7085100	6812600	6495200	6167500	6124200	10152000
Q9R0N0	GALK1_MOUSE	Galactokinase (EC 2.7.1.6) (Galactose kinase)	Galk1 Galk Glk	1	14	14	14	123.09	632	78033000	7.89228	1482600000	9.17102	127950000	98677000	129710000	107900000	83917000	63370000	75129000	90509000	64960000	182990000	220450000	237060000	632	3954100	4763700	3418900	9630900	11603000	12477000	6734000	5193500	6826900	5679100	4416700	3335200	3293500	3993700	3159400	4962700	5262400	4936400	4386100	4148500	4655500	3888400	3251200
P97798	NEO1_MOUSE	Neogenin	Neo1 Ngn	1	29	29	29	323.31	633	77834000	7.89117	5993200000	9.77766	652150000	783650000	471470000	462820000	1136700000	399900000	193850000	187190000	178390000	442870000	510010000	574190000	633	2517600	2431000	2316800	5751600	6623600	7457100	8469500	10177000	6123000	6010600	14763000	5193500	8433700	9294500	9167800	15240000	13522000	15554000	19221000	21472000	15609000	17939000	46520000
Q8VDM4	PSMD2_MOUSE	26S proteasome non-ATPase regulatory subunit 2 (26S proteasome regulatory subunit RPN1) (26S proteasome regulatory subunit S2) (26S proteasome subunit p97)	Psmd2	1	30	30	30	210.02	634	77594000	7.88983	4655600000	9.66798	402920000	433960000	499760000	184970000	192910000	142800000	437210000	394640000	365080000	377940000	539910000	683510000	634	7286900	6577300	6084700	6298900	8998600	11392000	6715400	7232600	8329400	3082900	3215200	2380100	13330000	13050000	13240000	12190000	14258000	14114000	13367000	12559000	14443000	8804800	10095000
P27048	RSMB_MOUSE	Small nuclear ribonucleoprotein-associated protein B (snRNP-B) (snRPB) (Sm protein B) (Sm-B) (SmB)	Snrpb	2	9	9	9	28.842	635	77492000	7.88926	1317400000	9.11972	84226000	128640000	94828000	117580000	96429000	68582000	88877000	93552000	74637000	156070000	148500000	165430000	635	5228000	5503100	4390400	9180400	8735300	9731400	4954400	7567200	5578100	6916500	5672300	4034300	3342500	3242800	3478100	3595400	4332900	3557200	2940000	3615600	3799400	4096200	4007300
Q60864	STIP1_MOUSE	Stress-induced-phosphoprotein 1 (STI1) (mSTI1) (Hsc70/Hsp90-organizing protein) (Hop)	Stip1	1	23	23	23	197.02	636	77491000	7.88925	3797100000	9.57945	325340000	316110000	301250000	125460000	77987000	39229000	486070000	525220000	385590000	332650000	395290000	483200000	636	9919800	10719000	7869200	6788800	8067100	9861200	6639500	6451200	6148100	2560400	1591600	800590	14281000	14773000	12965000	11067000	9720400	9382300	8941800	10023000	9930700	5632400	4708000
P70444	BID_MOUSE	BH3-interacting domain death agonist (p22 BID) (BID) [Cleaved into: BH3-interacting domain death agonist p15 (p15 BID); BH3-interacting domain death agonist p13 (p13 BID); BH3-interacting domain death agonist p11 (p11 BID)]	Bid	1	6	6	6	177.61	637	77482000	7.8892	1007300000	9.00316	46499000	41842000	65864000	16690000	74203000	32468000	72748000	93491000	81691000	64016000	168410000	249340000	637	5596000	7191600	6284000	4924300	12955000	19180000	3576800	3218700	5066500	1283800	5707900	2497500	3098700	2517300	2974400	2812500	2946800	3292200	0	0	2237500	1542300	2970900
Q8R361	RFIP5_MOUSE	Rab11 family-interacting protein 5 (Rab11-FIP5) (Rab11-interacting protein Rip11)	Rab11fip5 D6Ertd32e Rip11	1	2	2	2	1.8983	638	77389000	7.88868	3482500000	9.54189	91025000	102640000	57788000	1252700000	1015300000	866950000	20576000	10481000	1629300	3424900	2526700	57442000	638	457230	232920	36207	76109	56148	1276500	2022800	2280800	1284200	27838000	22563000	19266000	0	0	0	0	0	0	0	0	0	57978000	0
Q9DBZ5	EIF3K_MOUSE	Eukaryotic translation initiation factor 3 subunit K (eIF3k) (Eukaryotic translation initiation factor 3 subunit 12) (eIF-3 p25)	Eif3k Eif3s12	1	6	6	6	22.764	639	77297000	7.88816	1082200000	9.03431	72464000	96353000	119690000	42940000	32563000	12414000	141280000	113200000	132390000	82132000	100320000	136410000	639	10091000	8085700	9456300	5866600	7166000	9743300	5176000	6882400	8549600	3067200	2325900	886720	3902400	3694200	3948800	3096200	2819500	2822700	2240400	2525000	3313500	2333200	1692800
P48758	CBR1_MOUSE	Carbonyl reductase [NADPH] 1 (EC 1.1.1.184) (15-hydroxyprostaglandin dehydrogenase [NADP(+)]) (EC 1.1.1.197) (NADPH-dependent carbonyl reductase 1) (Prostaglandin 9-ketoreductase) (Prostaglandin-E(2) 9-reductase) (EC 1.1.1.189)	Cbr1 Cbr	1	14	14	14	64.021	640	77179000	7.8875	1697900000	9.22991	105000000	87670000	89375000	137580000	122290000	98051000	116300000	105270000	89334000	228230000	236860000	281990000	640	5286300	4785200	4060600	10374000	10766000	12818000	4772600	3985000	4062500	6253600	5558600	4456900	5202300	4448000	4296700	6366600	6523800	6737000	3600800	3204800	3520100	4443200	5370500
P62880	GBB2_MOUSE	Guanine nucleotide-binding protein G(I)/G(S)/G(T) subunit beta-2 (G protein subunit beta-2) (Transducin beta chain 2)	Gnb2	3	10	10	5	111.46	641	77169000	7.88744	1389000000	9.1427	162970000	143590000	122610000	87977000	84041000	53943000	159220000	133600000	166220000	96247000	86555000	92075000	641	8845600	7422200	9234300	5347100	4808600	5115300	9053700	7977000	6811800	4887600	4668900	2996800	5186700	4644000	4743300	3467000	2663100	2769300	4612100	4385300	4040700	3819500	3772400
O35593	PSDE_MOUSE	26S proteasome non-ATPase regulatory subunit 14 (EC 3.4.19.-) (26S proteasome regulatory subunit RPN11) (MAD1)	Psmd14 Pad1	1	11	11	11	60.6	642	77126000	7.8872	1311100000	9.11764	148310000	108770000	95973000	100700000	78163000	53074000	112910000	67945000	75679000	118140000	147780000	203700000	642	6641700	3996700	4451700	6949500	8692700	11983000	8724100	6398000	5645500	5923600	4597800	3122000	3658400	3135500	3135600	3369900	3792800	4569200	3756700	3885900	4025600	3137800	3554700
P15535	B4GT1_MOUSE	Beta-1,4-galactosyltransferase 1 (Beta-1,4-GalTase 1) (Beta4Gal-T1) (b4Gal-T1) (EC 2.4.1.-) (Beta-N-acetylglucosaminyl-glycolipid beta-1,4-galactosyltransferase) (Beta-N-acetylglucosaminylglycopeptide beta-1,4-galactosyltransferase) (EC 2.4.1.38) (Lactose synthase A protein) (EC 2.4.1.22) (N-acetyllactosamine synthase) (EC 2.4.1.90) (Nal synthase) (UDP-Gal:beta-GlcNAc beta-1,4-galactosyltransfera…	B4galt1 Ggtb Ggtb2	1	9	9	9	159	643	76870000	7.88576	1921800000	9.28371	197380000	231730000	152440000	147690000	258600000	99701000	92590000	118830000	92664000	148390000	207710000	174040000	643	3703600	4753100	3706500	5935600	8308400	6961600	7895200	9269400	6097800	5907500	10344000	3988000	2789100	3295000	3789100	3787500	4563300	5220800	7916700	9106200	6847800	4663300	8805000
Q01405	SC23A_MOUSE	Protein transport protein Sec23A (SEC23-related protein A)	Sec23a Sec23 Sec23r	1	28	28	25	303.04	644	76756000	7.88511	3607500000	9.55721	399730000	242380000	279750000	310400000	267880000	208140000	218740000	212100000	195760000	345200000	335990000	591450000	644	4654000	4512700	4165200	7344700	7148800	12584000	8504800	5157000	5952100	6604200	5699600	4428400	8116500	8004500	7656400	9311500	10265000	12266000	11225000	10884000	11463000	10464000	11729000
Q9Z1Z0	USO1_MOUSE	General vesicular transport factor p115 (Protein USO1 homolog) (Transcytosis-associated protein) (TAP) (Vesicle-docking protein)	Uso1 Vdp	1	32	32	32	323.31	645	76749000	7.88507	4528200000	9.65593	493740000	454860000	438810000	211400000	251040000	182990000	264990000	309660000	228140000	385350000	596910000	710300000	645	4491400	5248400	3866800	6531400	10117000	12039000	8368400	7709400	7437400	3583000	4254900	3101500	9069800	10051000	9645000	13387000	15206000	13528000	13188000	12106000	13418000	10943000	12231000
O70591	PFD2_MOUSE	Prefoldin subunit 2	Pfdn2 Pfd2	1	5	5	5	51.166	646	76638000	7.88444	1072900000	9.03056	75335000	90980000	89648000	70180000	50510000	21575000	86240000	86724000	69242000	139110000	143680000	149710000	646	6160000	6194500	4945800	9936400	10263000	10694000	5381000	6498600	6403400	5012800	3607900	1541100	2633700	2644000	2255000	4842000	3187400	3151500	2494700	2484300	2238000	3850200	2988400
P10518	HEM2_MOUSE	Delta-aminolevulinic acid dehydratase (ALADH) (EC 4.2.1.24) (Porphobilinogen synthase)	Alad Lv	1	12	12	12	49.937	647	76615000	7.88431	1532300000	9.18534	87072000	79271000	91010000	122070000	95626000	91552000	151310000	128290000	150990000	201410000	185430000	148270000	647	7565600	6414600	7549600	10071000	9271400	7413300	4353600	3963500	4550500	6103400	4781300	4577600	5396300	4676300	5298300	3786900	4836600	5335200	3227000	3083100	4503600	4730700	3760700
P83882	RL36A_MOUSE	60S ribosomal protein L36a (60S ribosomal protein L44)	Rpl36a Rpl44	1	3	3	3	15.421	648	76446000	7.88335	688020000	8.8376	0	0	0	31690000	26742000	17475000	180520000	111520000	170440000	69520000	80112000	0	648	20058000	12391000	18938000	7724400	8901300	0	0	0	0	3521200	2971400	1941700	6894200	4554800	4162900	2146900	2045000	0	0	0	0	1916100	1410900
P26516	PSMD7_MOUSE	26S proteasome non-ATPase regulatory subunit 7 (26S proteasome regulatory subunit RPN8) (26S proteasome regulatory subunit S12) (Mov34 protein) (Proteasome subunit p40)	Psmd7 Mov-34 Mov34	1	9	9	9	58.573	649	76162000	7.88174	1751700000	9.24346	139040000	111580000	116180000	139550000	120260000	91701000	154840000	143590000	138460000	172500000	218120000	205920000	649	6732000	6243100	6019900	7500000	9483400	8953200	6045200	4851200	5051400	6067200	5228700	3987000	5353500	4750000	5495700	4382600	5615800	5033800	4822300	3927000	4072600	4210900	4464500
P28352	APEX1_MOUSE	DNA-(apurinic or apyrimidinic site) lyase (EC 3.1.-.-) (EC 4.2.99.18) (APEX nuclease) (APEN) (Apurinic-apyrimidinic endonuclease 1) (AP endonuclease 1) (REF-1) (Redox factor-1) [Cleaved into: DNA-(apurinic or apyrimidinic site) lyase, mitochondrial]	Apex1 Ape Apex Ref1	1	11	11	11	92.342	650	76050000	7.8811	1749200000	9.24284	163660000	152300000	146770000	99213000	82608000	66734000	172340000	113450000	144820000	171650000	176070000	259540000	650	7493100	4932800	6296400	7462900	7655000	11285000	7115700	6621600	6381500	4313600	3591600	2901500	5399500	4742800	4872400	5740800	4719000	5594900	4427000	4207100	4545500	4901800	4294400
O35598	ADA10_MOUSE	Disintegrin and metalloproteinase domain-containing protein 10 (ADAM 10) (EC 3.4.24.81) (Kuzbanian protein homolog) (Mammalian disintegrin-metalloprotease) (CD antigen CD156c)	Adam10 Kuz Madm	1	12	12	12	190.21	651	75807000	7.87971	3942000000	9.59572	632060000	503070000	523690000	82096000	344820000	139510000	146060000	160410000	173290000	324550000	333640000	578790000	651	2808900	3084800	3332400	6241300	6416100	11131000	12155000	9674400	10071000	1578800	6631200	2682800	5343900	6885400	6264800	10586000	8197100	12558000	17136000	16106000	14553000	6524700	13789000
Q9CQ60	6PGL_MOUSE	6-phosphogluconolactonase (6PGL) (EC 3.1.1.31)	Pgls	1	8	8	8	63.538	652	75726000	7.87925	1211600000	9.08336	83124000	70456000	54080000	50066000	33764000	38186000	132450000	129660000	98160000	170400000	159180000	192100000	652	8278100	8103700	6135000	10650000	9948500	12006000	5195200	4403500	3380000	3129100	2110300	2386600	3951600	3562500	3545200	3747300	4305600	4018800	2421900	2341900	3098500	2621700	2453300
Q9Z0J7	GDF15_MOUSE	Growth/differentiation factor 15 (GDF-15) (Macrophage inhibitory cytokine 1) (MIC-1)	Gdf15 Mic1 Sbf	1	8	8	8	63.992	653	75560000	7.87829	1813400000	9.25849	212920000	166700000	176760000	290050000	282110000	181090000	38503000	44208000	52183000	110350000	109080000	149470000	653	1604300	1842000	2174300	4597800	4544800	6228000	8871900	6946000	7365000	12086000	11755000	7545400	2324100	2229100	2074300	3644000	3474400	3359500	6960800	6457000	6697600	11333000	10957000
Q9JLV1	BAG3_MOUSE	BAG family molecular chaperone regulator 3 (BAG-3) (Bcl-2-associated athanogene 3) (Bcl-2-binding protein Bis)	Bag3 Bis MNCb-2243	1	24	24	24	131.37	654	75387000	7.8773	3317000000	9.52075	245900000	271090000	268990000	129830000	160390000	91190000	301630000	288770000	298750000	366160000	370190000	524150000	654	6855300	6563000	6789700	8321900	8413300	11912000	5588600	6161200	6113400	2950600	3645200	2072500	9228000	10522000	10824000	10733000	9600300	11086000	8652100	7474400	8065200	6619500	6900300
Q8QZY1	EIF3L_MOUSE	Eukaryotic translation initiation factor 3 subunit L (eIF3l) (66 kDa tyrosine-rich heat shock protein) (67 kDa polymerase-associated factor) (Eukaryotic translation initiation factor 3 subunit 6-interacting protein) (Eukaryotic translation initiation factor 3 subunit E-interacting protein) (HSP-66Y) (PAF67)	Eif3l Eif3eip Eif3s6ip Paf67	1	25	25	25	312.77	655	75083000	7.87554	2853100000	9.45532	245550000	183800000	198170000	142320000	107180000	90049000	333820000	345860000	314910000	292010000	294610000	304870000	655	8784800	9101600	8287100	7684400	7752900	8022900	6461800	4836900	5214900	3745200	2820500	2369700	10407000	11812000	10495000	6793700	8804800	7148300	7341300	6485600	7226900	6731200	5494800
Q62383	SPT6H_MOUSE	Transcription elongation factor SPT6	Supt6h Kiaa0162 Supt6	1	3	3	3	5.3052	656	75030000	7.87523	8403400000	9.92446	865230000	842170000	1165000000	28962000	124330000	40276000	1065200000	1253100000	1138800000	5384500	633050000	1090600000	656	9510800	11188000	10168000	48076	5652200	9737400	7725300	7519400	10402000	258590	1110100	359610	0	0	0	0	0	24514000	0	0	0	0	0
Q9DAK9	PHP14_MOUSE	14 kDa phosphohistidine phosphatase (EC 3.9.1.3) (Phosphohistidine phosphatase 1) (PHPT1) (Protein histidine phosphatase) (PHP)	Phpt1 Php14	1	6	6	6	30.436	657	74915000	7.87457	749150000	8.87457	45138000	11882000	38399000	25407000	73939000	34071000	56443000	60736000	50558000	139040000	107270000	103440000	657	5644300	6073600	5055800	13904000	10727000	10344000	4513800	1188200	3839900	2540700	7393900	3407100	2063200	2241300	1975200	3166000	2680900	2848800	1686400	0	1482500	1513300	2113200
P40336	VP26A_MOUSE	Vacuolar protein sorting-associated protein 26A (H<beta>58 protein) (H beta 58) (Vesicle protein sorting 26A) (mVPS26)	Vps26a Vps26	1	12	12	11	94.381	658	74804000	7.87392	1944900000	9.2889	163490000	223400000	172220000	108060000	117790000	91996000	90110000	83197000	115350000	185010000	265060000	329230000	658	3465800	3199900	4436400	7115900	10195000	12663000	6287900	8592300	6623800	4156100	4530300	3538300	4587600	4515400	4150600	5935300	6631800	5877300	4940600	5683400	5312800	4589900	5632500
O88487	DC1I2_MOUSE	Cytoplasmic dynein 1 intermediate chain 2 (Cytoplasmic dynein intermediate chain 2) (Dynein intermediate chain 2, cytosolic) (DH IC-2)	Dync1i2 Dnci2 Dncic2	1	18	18	18	204.21	659	74707000	7.87336	2315900000	9.36472	152470000	205660000	204080000	141960000	102600000	97456000	161910000	159310000	189150000	254800000	299130000	347380000	659	5223000	5139000	6101600	8219400	9649500	11206000	4918400	6634200	6583400	4579300	3309600	3143700	5673300	5482900	5053700	8299600	8351400	7190600	6073000	6308200	7084500	6070300	4757100
P56389	CDD_MOUSE	Cytidine deaminase (EC 3.5.4.5) (Cytidine aminohydrolase)	Cda Cdd	1	4	4	4	134.29	660	74628000	7.8729	895530000	8.95208	111990000	64669000	71031000	53909000	55226000	36802000	56239000	58460000	46461000	85680000	112590000	142470000	660	4686600	4871700	3871700	7140000	9382800	11872000	9332700	5389100	5919200	4492400	4602200	3066900	2476600	2004000	1752500	2869000	2888400	2979900	2796400	2260200	2638600	2261100	2337700
P26039	TLN1_MOUSE	Talin-1	Tln1 Tln	2	81	81	81	323.31	661	74560000	7.87251	12228000000	10.0874	912590000	841990000	724570000	507220000	259580000	240170000	1710200000	1713100000	1484700000	1087500000	1316900000	1428300000	661	10428000	10446000	9052800	6631200	8030100	8709200	5564600	5134100	4418100	3092800	1582800	1464400	48995000	50537000	46601000	35608000	35274000	34861000	27288000	26246000	28740000	22331000	16384000
Q8R317	UBQL1_MOUSE	Ubiquilin-1 (Protein linking IAP with cytoskeleton 1) (PLIC-1)	Ubqln1 Plic1	2	14	14	12	171.59	662	74241000	7.87064	1113600000	9.04673	96849000	95814000	97218000	77008000	76611000	49757000	65627000	92025000	75411000	103120000	131180000	147950000	662	4375100	6135000	5027400	6874900	8745300	9863400	6456600	6387600	6481200	5133900	5107400	3317100	2887200	3241100	2937400	2403800	3394600	3582900	3630900	3085300	3747800	1961500	2423400
Q8BP47	SYNC_MOUSE	Asparagine--tRNA ligase, cytoplasmic (EC 6.1.1.22) (Asparaginyl-tRNA synthetase) (AsnRS)	Nars	1	20	20	20	99.464	663	73751000	7.86777	2507500000	9.39924	128390000	165660000	186990000	67233000	42635000	32183000	503360000	365010000	322160000	185880000	263980000	244030000	663	14805000	10736000	9475400	5467200	7764200	7177400	3776100	4872200	5499800	1977400	1254000	946550	12765000	10311000	10990000	6076500	6846600	4996200	5509600	5479900	6774500	4185800	3595000
Q9D1Q6	ERP44_MOUSE	Endoplasmic reticulum resident protein 44 (ER protein 44) (ERp44) (Thioredoxin domain-containing protein 4)	Erp44 Kiaa0573 Txndc4	1	12	12	12	52.785	664	73480000	7.86617	1910500000	9.28115	156960000	163790000	201850000	274420000	129130000	122020000	69203000	80296000	100930000	112400000	175580000	322420000	664	2661700	3088300	3882100	4323100	6753000	12401000	6037000	6299700	7763500	10555000	4966600	4693000	3034500	3106700	4686000	4086900	3988200	6039600	5301600	6163000	5799400	8767500	6640800
Q60876	4EBP1_MOUSE	Eukaryotic translation initiation factor 4E-binding protein 1 (4E-BP1) (eIF4E-binding protein 1) (Phosphorylated heat- and acid-stable protein regulated by insulin 1) (PHAS-I)	Eif4ebp1	1	5	5	5	11.081	665	73427000	7.86586	440560000	8.64401	13150000	13344000	0	17358000	5029300	6409500	61229000	53823000	45128000	4953500	137890000	82242000	665	10205000	8970500	7521300	825580	22982000	13707000	2191700	2224100	0	2893000	838210	1068300	1789300	1716700	1577600	0	2913600	2564700	0	0	0	1462800	0
Q5FWK3	RHG01_MOUSE	Rho GTPase-activating protein 1 (Rho-type GTPase-activating protein 1)	Arhgap1	1	16	16	16	110.41	666	73260000	7.86487	2271100000	9.35624	157620000	112030000	179870000	96098000	84317000	104850000	184560000	188470000	202080000	260650000	339820000	360710000	666	5953500	6079600	6518600	8408200	10962000	11636000	5084400	3613900	5802100	3100000	2719900	3382400	6294200	6538800	6060800	8439900	8045600	7551900	4985600	5771900	5527500	3961000	5323800
P53994	RAB2A_MOUSE	Ras-related protein Rab-2A	Rab2a Rab2	2	8	8	8	127.49	667	73232000	7.8647	1171700000	9.06882	174580000	153480000	162040000	63071000	72676000	47540000	53938000	35413000	67927000	89576000	94995000	156000000	667	3371200	2213300	4245500	5598500	5937200	9750000	10911000	9592700	10128000	3941900	4542200	2971300	2612900	1990900	2562700	3112300	3021400	3395500	3613100	2999200	3380300	2465700	2897500
P56391	CX6B1_MOUSE	Cytochrome c oxidase subunit 6B1 (Cytochrome c oxidase subunit VIb isoform 1) (COX VIb-1)	Cox6b1 Cox6b	1	5	5	5	14.885	668	72877000	7.86259	583020000	8.76568	68222000	45292000	26566000	70171000	51140000	39494000	52165000	58215000	39787000	37258000	49178000	45528000	668	6520700	7276900	4973400	4657300	6147200	5690900	8527800	5661500	3320800	8771400	6392500	4936700	1777700	1476700	1596900	1130500	1297300	1028100	1773900	1592900	1137600	3601900	2397300
Q06335	APLP2_MOUSE	Amyloid-like protein 2 (APLP-2) (CDEI box-binding protein) (CDEBP)	Aplp2	1	18	16	16	97.883	669	72871000	7.86255	2696200000	9.43075	305740000	433570000	289080000	189100000	266750000	124430000	93764000	84324000	99600000	167980000	224290000	417590000	669	2534200	2279000	2691900	4540000	6061900	11286000	8263300	11718000	7813000	5110900	7209500	3363000	3943700	4993700	5279000	6033400	6358900	7807500	8474700	10821000	8483400	8487100	10631000
P61222	ABCE1_MOUSE	ATP-binding cassette sub-family E member 1 (RNase L inhibitor) (Ribonuclease 4 inhibitor) (RNS4I)	Abce1 Rli	1	24	24	24	202.64	670	72744000	7.8618	3491700000	9.54304	213410000	82030000	164540000	138950000	119560000	127020000	394460000	357200000	308960000	415690000	524840000	644700000	670	8218000	7441600	6436600	8660300	10934000	13431000	4446000	1709000	3427900	2894700	2490900	2646200	12106000	12365000	12157000	12806000	13668000	12812000	6675100	5519200	5594800	6200900	6738600
Q9JM76	ARPC3_MOUSE	Actin-related protein 2/3 complex subunit 3 (Arp2/3 complex 21 kDa subunit) (p21-ARC)	Arpc3	1	6	6	6	52.135	671	72473000	7.86018	1232000000	9.09061	92761000	98280000	101580000	119860000	104830000	85875000	102050000	94145000	78633000	99407000	175910000	78715000	671	6003100	5537900	4625500	5847400	10348000	4630300	5456500	5781200	5975300	7050500	6166200	5051400	3774900	3063500	3240400	3123200	3813600	3607200	3361100	3958900	3983500	3895800	4047600
Q91WQ3	SYYC_MOUSE	Tyrosine--tRNA ligase, cytoplasmic (EC 6.1.1.1) (Tyrosyl-tRNA synthetase) (TyrRS) [Cleaved into: Tyrosine--tRNA ligase, cytoplasmic, N-terminally processed]	Yars	1	29	29	29	98.816	672	72375000	7.85959	3401600000	9.53168	252040000	238060000	222560000	186100000	85334000	73712000	341890000	339150000	320600000	430820000	446700000	464660000	672	7274300	7215900	6821300	9166300	9504300	9886300	5362700	5065000	4735300	3959700	1815600	1568300	10122000	10010000	10773000	12577000	11785000	10869000	8076700	7705100	8352300	7487200	5080200
Q99KI0	ACON_MOUSE	Aconitate hydratase, mitochondrial (Aconitase) (EC 4.2.1.3) (Citrate hydro-lyase)	Aco2	1	29	29	29	209.62	673	72236000	7.85875	3756300000	9.57476	183450000	229170000	161020000	494350000	413560000	268530000	328860000	276820000	314810000	303220000	308340000	473000000	673	6324200	5323400	6054000	5831200	5929700	9096200	3527800	4407200	3096500	9506700	7953000	5164100	11554000	10913000	12078000	10208000	9005800	11297000	7196700	8356700	7010400	19722000	15364000
Q9WU28	PFD5_MOUSE	Prefoldin subunit 5 (EIG-1) (Myc modulator 1) (c-Myc-binding protein Mm-1)	Pfdn5 Eig1 Mm1 Pfd5	1	6	6	6	98.964	674	72185000	7.85845	938410000	8.97239	80653000	70809000	61519000	52224000	49814000	34885000	69435000	70628000	78725000	91215000	118900000	159600000	674	5341200	5432900	6055800	7016600	9146100	12277000	6204100	5446800	4732300	4017200	3831800	2683500	2725700	2649200	2691700	2889300	3429600	3473800	1990800	2119800	1984900	2189000	2224400
Q60973	RBBP7_MOUSE	Histone-binding protein RBBP7 (Histone acetyltransferase type B subunit 2) (Nucleosome-remodeling factor subunit RBAP46) (Retinoblastoma-binding protein 7) (RBBP-7) (Retinoblastoma-binding protein p46)	Rbbp7 Rbap46	1	12	8	8	38.623	675	72169000	7.85835	1371200000	9.1371	89870000	68274000	13523000	71496000	51742000	45709000	221110000	149540000	202230000	96300000	137220000	224190000	675	11638000	7870600	10644000	5068400	7222300	11799000	4730000	3593300	711750	3762900	2723300	2405800	5466600	6254600	5500900	3776400	2914500	3978900	3644200	3626300	0	2737400	3319100
P84091	AP2M1_MOUSE	AP-2 complex subunit mu (AP-2 mu chain) (Adaptor protein complex AP-2 subunit mu) (Adaptor-related protein complex 2 subunit mu) (Clathrin assembly protein complex 2 mu medium chain) (Clathrin coat assembly protein AP50) (Clathrin coat-associated protein AP50) (Mu2-adaptin) (Plasma membrane adaptor AP-2 50 kDa protein)	Ap2m1 Clapm1	1	16	16	16	129.41	676	71989000	7.85727	2447600000	9.38874	286910000	357270000	250620000	190660000	145480000	125670000	129570000	153080000	182430000	176190000	222180000	227480000	676	3810800	4502300	5365700	5182000	6534600	6690600	8438400	10508000	7371100	5607600	4278900	3696100	5616400	5597800	6079300	7156800	6469500	6817700	7944100	8655200	7580400	6928700	6585000
Q4VAA2	CDV3_MOUSE	Protein CDV3 (Carnitine deficiency-associated protein 3) (Tyrosine-phosphorylated protein 36) (TPP36)	Cdv3	1	11	11	11	86.57	677	71911000	7.8568	1797800000	9.25474	128690000	139530000	115520000	87911000	92620000	48279000	190260000	152180000	111040000	225470000	226060000	280200000	677	7610500	6087300	4441600	9018700	9042600	11208000	5147600	5581300	4620800	3516400	3704800	1931200	5859300	6518300	5033700	5970700	5656500	5037700	4147100	4069000	4149800	3905200	4707800
P24527	LKHA4_MOUSE	Leukotriene A-4 hydrolase (LTA-4 hydrolase) (EC 3.3.2.6) (Leukotriene A(4) hydrolase)	Lta4h	1	26	26	26	323.31	678	71358000	7.85344	3211100000	9.50665	234660000	286870000	233620000	219230000	180470000	154420000	193940000	211860000	164240000	384960000	380860000	565850000	678	4309700	4707900	3649800	8554600	8463500	12574000	5214600	6374900	5191500	4871700	4010400	3431500	8507500	7304300	6911400	10390000	10135000	11928000	8596900	8081800	8237500	9539200	8220000
O88544	CSN4_MOUSE	COP9 signalosome complex subunit 4 (SGN4) (Signalosome subunit 4) (JAB1-containing signalosome subunit 4)	Cops4 Csn4	1	16	16	16	120.42	679	71315000	7.85318	2496000000	9.39724	238080000	208300000	240920000	168920000	163930000	107260000	145930000	163760000	163400000	232900000	268290000	394330000	679	4169500	4678700	4668600	6654100	7665400	11267000	6802400	5951300	6883500	4826200	4683800	3064500	5857800	6134500	7042700	8709900	6909900	7845300	6657900	5593700	6734800	7204400	6997700
Q8BK64	AHSA1_MOUSE	Activator of 90 kDa heat shock protein ATPase homolog 1 (AHA1)	Ahsa1	2	15	15	15	166.16	680	71266000	7.85288	2138000000	9.33001	142200000	113090000	150540000	176160000	166450000	98471000	189070000	147680000	167430000	209360000	268100000	306640000	680	6302300	4922800	5581000	6978800	8936700	10221000	4739900	3769600	5017900	5872000	5548500	3282400	6273000	5539500	5447700	5931800	6039600	5925500	5735200	5581200	5904100	5872200	6734800
P97461	RS5_MOUSE	40S ribosomal protein S5 [Cleaved into: 40S ribosomal protein S5, N-terminally processed]	Rps5	1	7	7	7	108.53	681	71058000	7.85161	1065900000	9.02772	35596000	67600000	83995000	138350000	63062000	52540000	119470000	130930000	127710000	108950000	60163000	77411000	681	7964700	8728400	8513700	7263600	4010800	5160700	2373000	4506700	5599700	9223100	4204100	3502700	3967300	6289800	5665600	2010500	1677200	2264800	1497700	2808400	3058500	3163500	3209900
P63085	MK01_MOUSE	Mitogen-activated protein kinase 1 (MAP kinase 1) (MAPK 1) (EC 2.7.11.24) (ERT1) (Extracellular signal-regulated kinase 2) (ERK-2) (MAP kinase isoform p42) (p42-MAPK) (Mitogen-activated protein kinase 2) (MAP kinase 2) (MAPK 2)	Mapk1 Erk2 Mapk Prkm1	3	15	15	11	83.356	682	70767000	7.84983	1769200000	9.24778	147600000	125870000	167140000	86450000	63703000	56272000	184950000	172990000	120100000	142070000	204590000	297440000	682	7398000	6919500	4804000	5683000	8183600	11898000	5904200	5034700	6685700	3458000	2548100	2250900	5128700	5402100	4534900	4910800	5659700	5695200	4480100	4431700	5082900	4024100	3052900
P51125	ICAL_MOUSE	Calpastatin (Calpain inhibitor)	Cast	1	25	25	25	323.31	683	70717000	7.84952	4030900000	9.6054	430450000	271570000	354500000	226310000	256160000	160480000	251530000	251360000	134050000	440720000	587580000	666130000	683	4412900	4409800	2351700	7731800	10308000	11687000	7551800	4764400	6219400	3970400	4494100	2815500	9386400	8724400	7957900	13543000	15823000	13136000	11121000	9715900	11680000	11041000	10004000
P50114	S100B_MOUSE	Protein S100-B (S-100 protein beta chain) (S-100 protein subunit beta) (S100 calcium-binding protein B)	S100b	1	3	3	3	9.5171	684	70716000	7.84952	282860000	8.45157	16856000	44686000	21374000	13045000	5308200	22475000	8362400	18093000	3209200	14865000	46597000	67993000	684	2090600	4523300	802310	3716300	11649000	16998000	4214000	11172000	5343500	3261200	1327100	5618600	575760	560870	0	648620	1182900	1178100	742790	1081000	504180	989650	0
Q9R0P5	DEST_MOUSE	Destrin (Actin-depolymerizing factor) (ADF) (Sid 23)	Dstn Dsn Sid23	1	6	6	6	37.155	685	70300000	7.84696	984200000	8.99308	104050000	100410000	80888000	56952000	38307000	24748000	97835000	100020000	88948000	67404000	101300000	123340000	685	6988200	7144100	6353500	4814600	7235700	8810300	7432000	7171900	5777700	4068000	2736200	1767700	2997700	2551700	3051900	2726900	2403200	2503300	2888400	2846600	2711900	2623600	2161900
Q9D8W5	PSD12_MOUSE	26S proteasome non-ATPase regulatory subunit 12 (26S proteasome regulatory subunit RPN5) (26S proteasome regulatory subunit p55)	Psmd12	1	19	19	19	117.09	686	70104000	7.84574	2593800000	9.41394	240840000	243520000	202220000	148750000	138500000	118770000	192940000	200950000	184680000	253320000	310780000	358410000	686	5214600	5431000	4991400	6846400	8399400	9686800	6509100	6581600	5465400	4020300	3743300	3210000	7610600	7359500	6587900	6618400	8167900	7417600	6830300	7372900	7101300	6037400	6150800
Q9D1M0	SEC13_MOUSE	Protein SEC13 homolog (GATOR complex protein SEC13) (SEC13-like protein 1) (SEC13-related protein)	Sec13 Sec13l1	1	6	6	6	84.502	687	69931000	7.84467	1188800000	9.07511	115830000	112730000	90361000	63336000	68355000	50993000	119670000	107230000	98549000	82122000	125050000	154610000	687	7039400	6307900	5797000	4830700	7356000	9094500	6813600	6631000	5315400	3725700	4020900	2999600	3678100	3342800	3471600	3146000	3633600	3724500	3240900	3119600	2826400	2601700	3302100
Q9Z1Z2	STRAP_MOUSE	Serine-threonine kinase receptor-associated protein (UNR-interacting protein)	Strap Unrip	1	14	14	14	96.286	688	69678000	7.8431	1672300000	9.22331	147280000	63897000	61928000	26866000	34440000	19142000	261510000	232800000	252570000	192070000	180090000	196290000	688	10896000	9700000	10524000	8003100	7503600	8178600	6136700	2662400	2580300	1119400	1435000	797570	6905400	6869400	6576600	5179100	4003400	4373500	4834100	3044800	4429500	2260100	2303900
P63280	UBC9_MOUSE	SUMO-conjugating enzyme UBC9 (EC 2.3.2.-) (RING-type E3 SUMO transferase UBC9) (SUMO-protein ligase) (Ubiquitin carrier protein 9) (mUBC9) (Ubiquitin carrier protein I) (Ubiquitin-conjugating enzyme E2 I) (Ubiquitin-protein ligase I)	Ube2i Ubc9 Ubce2i Ubce9	1	4	4	4	47.291	689	69670000	7.84305	627030000	8.79729	47901000	39392000	19180000	40645000	18912000	18619000	88708000	53990000	65335000	63074000	52157000	119120000	689	9856400	5998900	7259400	7008200	5795200	13235000	5322300	4376900	2131100	4516100	2101300	2068800	2589400	2456500	2136000	2038800	1779700	2133400	1399400	0	0	1664700	1345300
P47791	GSHR_MOUSE	Glutathione reductase, mitochondrial (GR) (GRase) (EC 1.8.1.7)	Gsr Gr1	1	14	14	14	185.8	690	69622000	7.84275	2088700000	9.31988	128330000	117050000	139680000	49497000	51028000	27709000	302840000	281310000	229270000	162050000	244520000	350170000	690	10095000	9377100	7642500	5401700	8150600	11672000	4277700	3901600	4656000	1649900	1700900	923630	6902900	7920600	6437400	5357400	7582800	9005800	4665400	4602300	5193600	2412700	2385100
P53690	MMP14_MOUSE	Matrix metalloproteinase-14 (MMP-14) (EC 3.4.24.80) (MMP-X1) (MT-MMP) (Membrane-type matrix metalloproteinase 1) (MT-MMP 1) (MTMMP1) (Membrane-type-1 matrix metalloproteinase) (MT1-MMP) (MT1MMP)	Mmp14 Mtmmp	1	3	3	3	79.37	691	69603000	7.84263	2505700000	9.39893	289450000	301850000	267100000	157590000	354590000	153120000	79365000	68221000	73300000	250670000	218910000	291560000	691	2204600	1895000	2036100	6963100	6080800	8099000	8040200	8384700	7419400	4377500	9849700	4253300	2629900	2502100	2560000	7762300	6253500	7200100	8799300	7914400	7935300	6802500	17295000
O08585	CLCA_MOUSE	Clathrin light chain A (Lca)	Clta	1	3	3	3	5.1653	692	69251000	7.84043	692510000	8.84043	0	0	0	60441000	66391000	50475000	83634000	51224000	66721000	170760000	142860000	0	692	8363400	5122400	6672100	17076000	14286000	0	0	0	0	6044100	6639100	5047500	3088200	1989600	2452500	4464400	4102000	0	0	0	0	3153800	3490300
Q9JIF7	COPB_MOUSE	Coatomer subunit beta (Beta-coat protein) (Beta-COP)	Copb1 Copb	1	32	32	32	225.24	693	69242000	7.84037	4777700000	9.67922	418400000	399350000	411220000	239990000	199670000	176280000	376870000	417310000	415430000	455270000	519370000	748510000	693	5461900	6047900	6020800	6598100	7527100	10848000	6063700	5787600	5959700	3478100	2893800	2554800	13654000	15201000	14111000	13830000	14285000	14897000	11233000	11459000	13930000	9782000	10194000
Q3UW53	NIBAN_MOUSE	Protein Niban (Protein FAM129A)	Fam129a Niban	1	25	25	25	131.08	694	69143000	7.83975	3457200000	9.53872	312120000	355760000	329540000	176580000	130040000	117140000	234960000	225510000	211910000	306360000	487940000	569310000	694	4699200	4510300	4238200	6127300	9758700	11386000	6242500	7115100	6590800	3531500	2600900	2342800	8034400	8501200	7990700	10308000	11090000	10844000	9641900	10335000	10617000	7903900	7012100
Q9WUK2	IF4H_MOUSE	Eukaryotic translation initiation factor 4H (eIF-4H) (Williams-Beuren syndrome chromosomal region 1 protein homolog)	Eif4h Wbscr1	1	8	8	8	115.13	695	68931000	7.83841	1378600000	9.13944	124710000	116570000	110450000	69128000	50245000	38567000	135790000	134770000	101490000	150330000	172780000	173780000	695	6789600	6738300	5074600	7516700	8639200	8689000	6235500	5828600	5522400	3456400	2512200	1928400	4988300	5753500	4750600	4054000	4332500	3721800	3276100	2915800	2775200	2073000	2986000
P04925	PRIO_MOUSE	Major prion protein (PrP) (PrP27-30) (PrP33-35C) (CD antigen CD230)	Prnp Prn-p Prp	1	5	5	5	46.509	696	68812000	7.83766	894550000	8.9516	164100000	179440000	139670000	46634000	51602000	31561000	21824000	16519000	15860000	51760000	37205000	138380000	696	1678800	1270700	1220000	3981500	2861900	10645000	12623000	13803000	10743000	3587200	3969400	2427700	1202600	0	0	1435700	839640	3941000	5724200	4987000	3074800	1838700	1420400
Q8CIE6	COPA_MOUSE	Coatomer subunit alpha (Alpha-coat protein) (Alpha-COP) [Cleaved into: Xenin (Xenopsin-related peptide); Proxenin]	Copa	1	41	41	41	206.68	697	68472000	7.83551	5820100000	9.76493	495070000	474190000	467050000	257130000	234760000	193960000	545370000	588560000	511050000	565840000	699000000	788140000	697	6416100	6924200	6012400	6656900	8223500	9272200	5824300	5578700	5494700	3025100	2761900	2281900	18952000	19409000	17403000	17217000	17674000	17747000	14741000	14420000	15518000	10657000	11984000
O55142	RL35A_MOUSE	60S ribosomal protein L35a	Rpl35a	1	6	6	6	17.927	698	68375000	7.8349	752130000	8.87629	57797000	44545000	56529000	50885000	22638000	20388000	115000000	106980000	103920000	57779000	56826000	49504000	698	10455000	9725800	9446800	5252600	5166000	4500300	5254300	4049600	5139000	4625900	2058000	1853400	4135500	3483200	4248200	1281900	1426700	1378700	1766400	2012000	1282700	1590300	1092000
Q8K4Z3	NNRE_MOUSE	NAD(P)H-hydrate epimerase (EC 5.1.99.6) (Apolipoprotein A-I-binding protein) (AI-BP) (NAD(P)HX epimerase)	Naxe Aibp Apoa1bp	1	6	6	6	92.733	699	68129000	7.83333	1021900000	9.00941	85636000	90778000	42170000	104400000	87916000	67822000	34300000	62231000	67971000	132460000	78641000	157650000	699	2286700	4148700	4531400	8830900	5242700	10510000	5709100	6051800	2811400	6959800	5861100	4521500	2027700	1872700	2082700	3899900	2838500	2763900	2131900	2634400	1629400	4843200	4325000
Q8K354	CBR3_MOUSE	Carbonyl reductase [NADPH] 3 (EC 1.1.1.184) (NADPH-dependent carbonyl reductase 3)	Cbr3	1	16	16	16	85.923	700	68006000	7.83255	1632100000	9.21275	55318000	66749000	67421000	71081000	70952000	60756000	171420000	159480000	117640000	244520000	261330000	285470000	700	7142400	6645200	4901700	10188000	10889000	11895000	2304900	2781200	2809200	2961700	2956400	2531500	5550100	4845800	4594500	6769800	5331300	6085700	2445700	2944400	3322000	3543800	3633200
Q9CZU6	CISY_MOUSE	Citrate synthase, mitochondrial (EC 2.3.3.1) (Citrate (Si)-synthase)	Cs	1	12	12	12	61.005	701	67748000	7.8309	1829200000	9.26226	114260000	84070000	76905000	180060000	121550000	107760000	212570000	180760000	290070000	140890000	145180000	170510000	701	7873000	6694700	10743000	5218000	5377200	6315200	4231700	3113700	2848300	6668700	4501900	3991100	6377400	6037700	7760100	5365000	4252600	4296500	3037400	3215600	3459500	7316000	6578000
Q9JKB3	YBOX3_MOUSE	Y-box-binding protein 3 (Cold shock domain-containing protein A) (DNA-binding protein A) (Y-box protein 3)	Ybx3 Csda Msy4	2	13	8	8	95.862	702	67392000	7.82861	1347800000	9.12963	87657000	73288000	78975000	38859000	36709000	29757000	229620000	226940000	289910000	64659000	67362000	124110000	702	11481000	11347000	14496000	3232900	3368100	6205600	4382900	3664400	3948800	1943000	1835500	1487900	7036200	6637500	7378000	2746800	2175300	2646300	2486000	1981800	3214700	1957300	1726800
Q8R1B4	EIF3C_MOUSE	Eukaryotic translation initiation factor 3 subunit C (eIF3c) (Eukaryotic translation initiation factor 3 subunit 8) (eIF3 p110)	Eif3c Eif3s8	1	25	25	25	323.31	703	67221000	7.8275	3697200000	9.56787	237070000	243040000	225910000	159950000	148160000	128750000	466350000	505350000	471080000	316840000	338190000	456460000	703	8479100	9188200	8565100	5760800	6149000	8299300	4310400	4418900	4107500	2908300	2693900	2340900	14242000	14110000	15815000	11530000	9640600	9814100	8402400	7998600	8404900	7590900	7461600
O35900	LSM2_MOUSE	U6 snRNA-associated Sm-like protein LSm2 (Protein G7b) (snRNP core Sm-like protein Sm-x5)	Lsm2 G7b	1	2	2	2	25.43	704	67047000	7.82638	670470000	8.82638	56481000	65869000	67305000	41195000	37417000	30266000	54473000	71624000	55238000	50122000	67602000	72879000	704	5447300	7162400	5523800	5012200	6760200	7287900	5648100	6586900	6730500	4119500	3741700	3026600	1804200	2320200	2011100	1768300	1636200	1489200	1387200	1810100	1926500	2206800	2097700
Q60668	HNRPD_MOUSE	Heterogeneous nuclear ribonucleoprotein D0 (hnRNP D0) (AU-rich element RNA-binding protein 1)	Hnrnpd Auf1 Hnrpd	1	10	10	9	25.738	705	66667000	7.82391	1333300000	9.12493	114830000	113070000	85933000	95280000	50363000	63352000	120620000	97930000	114880000	185340000	117010000	174720000	705	6030900	4896500	5744200	9267100	5850600	8736100	5741400	5653500	4296700	4764000	2518200	3167600	3915200	3678300	4312200	4061200	3061300	3876400	3753200	3505100	3908500	2623000	2299200
P57759	ERP29_MOUSE	Endoplasmic reticulum resident protein 29 (ERp29)	Erp29	1	9	9	9	45.064	706	66627000	7.82365	1265900000	9.1024	97336000	90494000	108240000	161250000	137760000	99254000	87004000	84433000	102360000	66828000	99022000	131940000	706	4579100	4443800	5387600	3517300	5211700	6944300	5123000	4762900	5696900	8486600	7250300	5223900	3029300	2836100	3750900	2737800	3037500	3083800	2728500	2626700	3377900	6697600	6590700
Q3UEB3	PUF60_MOUSE	Poly(U)-binding-splicing factor PUF60 (60 kDa poly(U)-binding-splicing factor)	Puf60	1	17	17	17	88.231	707	66573000	7.8233	2130300000	9.32844	234620000	211590000	221190000	143140000	132380000	63730000	132600000	176970000	180910000	141470000	238450000	253280000	707	4143800	5530300	5653300	4420800	7451600	7915100	7331900	6612100	6912200	4473300	4136800	1991600	5172500	5586000	6068400	5036400	5828900	4992900	6823500	5866300	7067500	5557600	6017400
Q62084	PP14B_MOUSE	Protein phosphatase 1 regulatory subunit 14B (Phosphatase holoenzyme inhibitor 1) (PHI-1) (Phospholipase C-beta-3 neighbouring gene protein)	Ppp1r14b Png	1	4	4	4	55.84	708	66489000	7.82275	465420000	8.66785	18355000	0	0	14912000	15559000	8914600	70482000	61536000	64097000	61020000	78088000	72458000	708	10069000	8790800	9156800	8717200	11155000	10351000	2622200	0	0	2130200	2222700	1273500	2241700	2161500	2106600	2228900	2193900	1767300	0	0	0	0	0
Q6P1B1	XPP1_MOUSE	Xaa-Pro aminopeptidase 1 (EC 3.4.11.9) (Aminoacylproline aminopeptidase) (Cytosolic aminopeptidase P) (Soluble aminopeptidase P) (sAmp) (X-Pro aminopeptidase 1) (X-prolyl aminopeptidase 1, soluble)	Xpnpep1	1	21	21	21	161.13	709	66367000	7.82195	2721100000	9.43474	244090000	264930000	222500000	222680000	158940000	110130000	147210000	121110000	96725000	293860000	395930000	442930000	709	3590400	2953800	2359200	7167400	9656900	10803000	5953400	6461800	5426900	5431300	3876600	2686200	5144900	5010000	4603200	9861000	10007000	8738400	7995200	7424600	8139600	8857000	6795000
Q9CQI6	COTL1_MOUSE	Coactosin-like protein	Cotl1 Clp	1	6	6	6	32.912	710	66322000	7.82166	729540000	8.86305	28715000	26326000	36662000	47146000	48881000	38272000	67716000	69197000	64607000	89362000	115370000	97288000	710	6156000	6290700	5873400	8123800	10488000	8844300	2610500	2393300	3332900	4286000	4443700	3479200	1954200	2384200	2234400	2606200	2714500	2356700	1265000	1714900	1781000	1772700	1973500
Q9CWM4	PFD1_MOUSE	Prefoldin subunit 1	Pfdn1	1	7	7	7	35.055	711	66041000	7.81981	726460000	8.86121	77534000	48742000	61729000	27840000	17269000	16274000	59912000	69171000	47234000	65737000	109800000	125220000	711	5446500	6288200	4294000	5976100	9981500	11383000	7048500	4431100	5611800	2530900	1570000	1479400	2231700	1793400	1894800	2409600	2310900	2206300	2027800	1392700	2221000	1490700	1431100
Q64337	SQSTM_MOUSE	Sequestosome-1 (STONE14) (Ubiquitin-binding protein p62)	Sqstm1 A170 STAP	1	16	16	16	132.5	712	65846000	7.81853	1580300000	9.19874	23637000	11315000	11483000	10989000	38904000	4951600	451550000	420660000	428210000	55121000	110790000	12701000	712	18814000	17527000	17842000	2296700	4616000	529200	984860	471440	478460	457890	1621000	206320	16727000	10633000	13717000	1727000	3354700	0	1048400	0	0	0	2528200
O88545	CSN6_MOUSE	COP9 signalosome complex subunit 6 (SGN6) (Signalosome subunit 6) (JAB1-containing signalosome subunit 6)	Cops6 Csn6	1	12	12	12	48.008	713	65765000	7.81799	1249500000	9.09674	92133000	68134000	77474000	86949000	85820000	44623000	93412000	128030000	107650000	122670000	132530000	207640000	713	4916400	6738600	5665800	6456400	6975400	10929000	4849100	3586000	4077600	4576200	4516900	2348600	3122400	2696600	4021300	3531100	3356500	4165800	2944700	2856600	3454300	3867400	3520900
P97371	PSME1_MOUSE	Proteasome activator complex subunit 1 (11S regulator complex subunit alpha) (REG-alpha) (Activator of multicatalytic protease subunit 1) (Proteasome activator 28 subunit alpha) (PA28a) (PA28alpha)	Psme1	1	11	11	11	74.899	714	65753000	7.81792	1380800000	9.14013	75725000	108820000	85352000	138550000	113940000	104500000	71129000	57469000	63828000	157810000	216900000	186790000	714	3387100	2736600	3039500	7514800	10329000	8894800	3606000	5181800	4064400	6597600	5425700	4976200	2785900	2825500	2687400	3774500	4662700	4137200	3556000	4472400	4149200	5343700	4813400
Q61545	EWS_MOUSE	RNA-binding protein EWS	Ewsr1 Ews Ewsh	1	8	8	8	45.569	715	65651000	7.81724	1838200000	9.26439	207200000	154240000	163370000	137850000	142880000	85570000	115590000	111790000	129510000	172970000	207150000	210110000	715	4128400	3992500	4625500	6177400	7398300	7504000	7399800	5508700	5834600	4923100	5102900	3056100	4168300	4659900	5233500	5586900	4591000	4139600	5525300	4269900	4744900	5888100	6282400
Q9WUA3	PFKAP_MOUSE	ATP-dependent 6-phosphofructokinase, platelet type (ATP-PFK) (PFK-P) (EC 2.7.1.11) (6-phosphofructokinase type C) (Phosphofructo-1-kinase isozyme C) (PFK-C) (Phosphohexokinase)	Pfkp Pfkc	1	27	24	23	234.7	716	65453000	7.81593	3010800000	9.47868	320030000	328210000	277540000	271790000	185780000	158320000	72853000	74880000	72197000	317230000	544140000	387860000	716	1583800	1627800	1569500	6896200	11829000	8431700	6957100	7135000	6033500	5908400	4038700	3441600	3859400	4151500	3621100	8766000	12532000	8712200	9006100	9739200	9902000	12367000	8157500
P23116	EIF3A_MOUSE	Eukaryotic translation initiation factor 3 subunit A (eIF3a) (Centrosomin) (Eukaryotic translation initiation factor 3 subunit 10) (eIF-3-theta) (eIF3 p167) (eIF3 p180) (eIF3 p185) (p162)	Eif3a Csma Eif3 Eif3s10	1	61	61	61	249.96	717	64979000	7.81277	7342700000	9.86586	601260000	554390000	603000000	293560000	269550000	163530000	979160000	891450000	881640000	586510000	794160000	710730000	717	8665100	7889000	7802200	5190400	7028000	6289700	5320900	4906100	5336300	2597900	2385400	1447200	27451000	28244000	26877000	18170000	19836000	18382000	18105000	18496000	19559000	13692000	13406000
P56812	PDCD5_MOUSE	Programmed cell death protein 5 (TF-1 cell apoptosis-related protein 19) (Protein TFAR19)	Pdcd5 Tfar19	1	3	3	3	17.77	718	64955000	7.81261	714510000	8.85401	56018000	58526000	60070000	41658000	32856000	29729000	49182000	52694000	61308000	72455000	82862000	117150000	718	4471100	4790400	5573400	6586800	7532900	10650000	5092500	5320500	5460900	3787100	2986900	2702600	1777700	1663800	1982400	2425900	2320600	2595900	1556600	1560600	1947400	1892100	1800400
Q3TXS7	PSMD1_MOUSE	26S proteasome non-ATPase regulatory subunit 1 (26S proteasome regulatory subunit RPN2) (26S proteasome regulatory subunit S1)	Psmd1	1	33	33	33	173.59	719	64832000	7.81179	3760300000	9.57522	249210000	262020000	247910000	210830000	178070000	168570000	382140000	409660000	354230000	359530000	514710000	423400000	719	6588600	7063200	6107400	6198800	8874300	7300000	4296700	4517500	4274300	3635000	3070200	2906300	12090000	11322000	12643000	9688300	11480000	11118000	9997100	9508500	12478000	7993800	7940700
Q922F4	TBB6_MOUSE	Tubulin beta-6 chain	Tubb6	1	20	10	9	146.9	720	64434000	7.80912	1482000000	9.17085	140380000	174490000	180630000	64777000	50159000	28358000	158890000	155150000	115200000	94051000	150970000	168910000	720	6908400	6745700	5008600	4089200	6564100	7344100	6103400	7586500	7853600	2816400	2180800	1232900	5876800	5455000	4662000	3768200	4265900	3822000	3505800	3870600	4249000	2664500	2285000
P46664	PURA2_MOUSE	Adenylosuccinate synthetase isozyme 2 (AMPSase 2) (AdSS 2) (EC 6.3.4.4) (Adenylosuccinate synthetase, acidic isozyme) (Adenylosuccinate synthetase, liver isozyme) (L-type adenylosuccinate synthetase) (IMP--aspartate ligase 2)	Adss Adss2	1	16	16	15	60.771	721	64253000	7.80789	1863300000	9.27028	113140000	63471000	121290000	68643000	23542000	35642000	308300000	294900000	229090000	130640000	191530000	283130000	721	10631000	10169000	7899700	4504700	6604600	9763000	3901500	2188700	4182600	2367000	811780	1229000	8801000	7072200	8049100	4880700	4843300	6494400	3787400	3301800	3986400	2562000	2425300
P16125	LDHB_MOUSE	L-lactate dehydrogenase B chain (LDH-B) (EC 1.1.1.27) (LDH heart subunit) (LDH-H)	Ldhb Ldh-2 Ldh2	1	13	12	12	108.33	722	64198000	7.80752	1476600000	9.16926	132930000	211300000	168900000	124030000	97866000	87202000	66050000	31311000	29892000	168520000	135020000	223420000	722	2871700	1361300	1299700	7327200	5870600	9714100	5779700	9187100	7343500	5392400	4255100	3791400	2445400	2250400	1926900	4703400	4310400	5032400	4434400	5349700	5002500	4936600	4135000
O89079	COPE_MOUSE	Coatomer subunit epsilon (Epsilon-coat protein) (Epsilon-COP)	Cope Cope1	1	12	12	12	79.365	723	63916000	7.80561	1470100000	9.16735	68890000	145190000	121640000	54311000	68488000	62899000	149190000	148400000	124290000	112950000	195120000	218690000	723	6486300	6452300	5404100	4911000	8483600	9508200	2995200	6312400	5288800	2361300	2977700	2734700	3696200	4186600	3904800	4309500	4380500	4622400	3364800	4336000	4407300	2826200	3506500
P62878	RBX1_MOUSE	E3 ubiquitin-protein ligase RBX1 (EC 2.3.2.27) (EC 2.3.2.32) (E3 ubiquitin-protein transferase RBX1) (RING finger protein 75) (RING-box protein 1) (Rbx1) [Cleaved into: E3 ubiquitin-protein ligase RBX1, N-terminally processed]	Rbx1	1	4	4	4	16.059	724	63874000	7.80532	255500000	8.40739	19143000	20679000	10220000	18815000	23498000	16006000	22301000	18981000	18313000	22765000	28754000	36025000	724	5575200	4745300	4578300	5691200	7188500	9006200	4785600	5169700	2554900	4703700	5874400	4001400	867930	718030	760670	783000	1000800	962930	619870	652620	0	620110	877560
O88685	PRS6A_MOUSE	26S proteasome regulatory subunit 6A (26S proteasome AAA-ATPase subunit RPT5) (Proteasome 26S subunit ATPase 3) (Tat-binding protein 1) (TBP-1)	Psmc3 Tbp1	1	17	17	17	241.14	725	63821000	7.80496	2106100000	9.32348	190260000	165410000	144550000	116770000	126610000	85446000	226220000	187560000	183950000	193860000	239680000	244300000	725	6855100	5683700	5574200	5874500	7263000	7403100	5765400	5012300	4380300	3538500	3836600	2589300	7775200	7206800	6859700	4877100	6480700	6082500	5602300	5424000	5823700	4557000	4189400
O88643	PAK1_MOUSE	Serine/threonine-protein kinase PAK 1 (EC 2.7.11.1) (Alpha-PAK) (CDC42/RAC effector kinase PAK-A) (p21-activated kinase 1) (PAK-1) (p65-PAK)	Pak1 Paka	1	18	18	11	199.34	726	63817000	7.80494	2042100000	9.31008	155990000	95770000	135470000	95742000	117320000	82483000	215050000	214140000	153570000	190980000	285880000	299740000	726	6720400	6692000	4799100	5968000	8933800	9367000	4874800	2992800	4233300	2991900	3666100	2577600	5576000	5813200	5740200	6382000	7005500	5918800	4678800	3811000	5215800	4998400	5370900
Q00612	G6PD1_MOUSE	Glucose-6-phosphate 1-dehydrogenase X (G6PD) (EC 1.1.1.49)	G6pdx G6pd G6pd-1	3	14	14	14	66.837	727	63800000	7.80482	2424400000	9.3846	92093000	123040000	152230000	335130000	237880000	205000000	203020000	242400000	196800000	170070000	211960000	229460000	727	5342500	6379000	5179000	4475600	5577800	6038400	2423500	3237800	4006100	8819200	6259900	5394600	11173000	10607000	10125000	8139500	8743200	8701600	5894000	6896700	7283700	4898800	3749000
Q8VBV7	CSN8_MOUSE	COP9 signalosome complex subunit 8 (SGN8) (Signalosome subunit 8) (COP9 homolog) (JAB1-containing signalosome subunit 8)	Cops8 Csn8	1	5	5	5	21.867	728	63741000	7.80442	637410000	8.80442	45961000	65191000	48956000	30553000	29444000	26992000	56229000	45734000	38612000	50958000	69861000	126080000	728	5622900	4573400	3861200	5095800	6986100	12608000	4596100	6519100	4895600	3055300	2944400	2699200	1858100	1710900	1803500	1582700	1602800	2101800	1305000	1858000	1716900	1451400	1827300
Q9JHU9	INO1_MOUSE	Inositol-3-phosphate synthase 1 (IPS 1) (EC 5.5.1.4) (Myo-inositol 1-phosphate synthase) (MI-1-P synthase) (MIP synthase)	Isyna1 Ino1	1	12	12	12	35.257	729	63640000	7.80373	1654600000	9.21869	113310000	118070000	91381000	60534000	62775000	54744000	183090000	193600000	149280000	90812000	240540000	296520000	729	7041800	7446100	5741400	3492800	9251700	11405000	4357900	4541100	3514600	2328200	2414400	2105500	6086800	5691700	5406300	4144300	5786700	6160200	3290200	3806200	3624100	2624500	2981300
Q921Y0	MOB1A_MOUSE	MOB kinase activator 1A (Mob1 homolog 1B) (Mps one binder kinase activator-like 1B)	Mob1a Mobk1b Mobkl1b	2	5	5	5	35.421	730	63094000	7.79999	694030000	8.84138	68680000	49638000	31419000	35018000	30922000	18593000	63596000	67767000	62277000	66595000	77309000	122220000	730	5781400	6160600	5661500	6054100	7028100	11110000	6243600	4512500	2856300	3183500	2811100	1690300	2276200	2047100	2286600	2323400	2074300	2315000	1801500	1456500	1409300	1543600	1419600
Q07079	IBP5_MOUSE	Insulin-like growth factor-binding protein 5 (IBP-5) (IGF-binding protein 5) (IGFBP-5)	Igfbp5 Igfbp-5	1	11	11	11	72.278	731	63003000	7.79936	1134000000	9.05461	131990000	128370000	134460000	42428000	159330000	170120000	8259200	11565000	11429000	74256000	120760000	141080000	731	458850	642480	634960	4125300	6708800	7837900	7332900	7131700	7469900	2357100	8851600	9451300	1029500	844350	826180	4091500	2918900	3780300	3751700	3372200	3039600	3276900	6303100
Q8BMJ3	IF1AX_MOUSE	Eukaryotic translation initiation factor 1A, X-chromosomal (eIF-1A X isoform) (Eukaryotic translation initiation factor 4C) (eIF-4C)	Eif1ax Eif1ay	1	4	4	3	10.752	732	62972000	7.79915	755660000	8.87833	24525000	20212000	6381600	29306000	30772000	21748000	119340000	123670000	117470000	86087000	107660000	68484000	732	9945300	10306000	9789400	7173900	8971800	5707000	2043700	1684400	531800	2442100	2564300	1812300	2444700	4667300	4380500	2569600	3773300	1624800	0	0	0	1809600	1802800
P45878	FKBP2_MOUSE	Peptidyl-prolyl cis-trans isomerase FKBP2 (PPIase FKBP2) (EC 5.2.1.8) (13 kDa FK506-binding protein) (13 kDa FKBP) (FKBP-13) (FK506-binding protein 2) (FKBP-2) (Immunophilin FKBP13) (Rotamase)	Fkbp2 Fkbp13	1	5	5	5	19.486	733	62935000	7.79889	566420000	8.75314	38551000	39474000	48720000	61467000	60838000	46772000	54156000	49223000	36982000	25930000	28258000	76046000	733	6017300	5469300	4109100	2881100	3139700	8449500	4283500	4386100	5413300	6829700	6759700	5196900	1742600	2014800	1635200	1308800	1408700	1641000	1485600	1515900	1645900	2107500	2043800
P35279	RAB6A_MOUSE	Ras-related protein Rab-6A (Rab-6)	Rab6a Rab6 MNCb-1660	3	3	3	3	50.768	734	62925000	7.79882	1069700000	9.02926	123140000	94790000	133480000	47464000	42362000	40934000	73403000	82531000	82526000	94019000	105740000	147790000	734	4317800	4854700	4854500	5530500	6220200	8693400	7243400	5575900	7851800	2792000	2491900	2407900	0	0	2648300	0	0	0	0	0	0	0	0
Q8K5B2	MCFD2_MOUSE	Multiple coagulation factor deficiency protein 2 homolog (Neural stem cell-derived neuronal survival protein)	Mcfd2 Sdnsf	1	2	2	2	11.106	735	62760000	7.79768	376560000	8.57583	0	49803000	9250800	41298000	38985000	44802000	24747000	28209000	23118000	8483000	63014000	44851000	735	4124500	4701500	3853000	1413800	10502000	7475100	0	8300400	1541800	6883000	6497600	7467100	0	1233800	1093600	0	1287500	0	0	1395500	0	2051700	1672600
Q9DBV4	MXRA8_MOUSE	Matrix remodeling-associated protein 8 (Adipocyte-specific protein 3) (Dual Ig domain-containing cell adhesion molecule) (DICAM) (Limitrin)	Mxra8 Asp3 Dicam	1	12	12	12	54.015	736	62390000	7.79511	1871700000	9.27224	274430000	248950000	186570000	115360000	283290000	66968000	6683800	53770000	16988000	142040000	128760000	346410000	736	222790	1792300	566260	4734500	4291900	11547000	9147700	8298300	6219100	3845400	9443200	2232300	924290	2134100	1519200	5757900	3566600	6122200	6883700	5239300	4770600	4950100	16267000
P56380	AP4A_MOUSE	Bis(5'-nucleosyl)-tetraphosphatase [asymmetrical] (EC 3.6.1.17) (Diadenosine 5',5'''-P1,P4-tetraphosphate asymmetrical hydrolase) (Ap4A hydrolase) (Ap4Aase) (Diadenosine tetraphosphatase) (Nucleoside diphosphate-linked moiety X motif 2) (Nudix motif 2)	Nudt2 Apah1	1	8	8	8	29.654	737	62371000	7.79498	686080000	8.83637	51002000	55538000	57478000	41522000	30803000	23288000	62664000	51455000	49270000	48098000	87730000	127230000	737	5696700	4677700	4479100	4372600	7975500	11566000	4636500	5048900	5225300	3774800	2800200	2117100	1914200	1826700	2300500	1192000	2446900	2090100	1461100	1281100	1690800	1986000	1853000
P61082	UBC12_MOUSE	NEDD8-conjugating enzyme Ubc12 (EC 2.3.2.-) (NEDD8 carrier protein) (Ubiquitin-conjugating enzyme E2 M)	Ube2m Ubc-rs2 Ubc12	1	8	8	8	23.991	738	62313000	7.79458	810070000	8.90852	57631000	42818000	52530000	63552000	42888000	30201000	67309000	49788000	62319000	101510000	103930000	135590000	738	5177600	3829900	4793800	7808800	7994300	10430000	4433200	3293700	4040700	4888600	3299100	2323200	2161100	2074600	2047500	2814000	2603300	2926400	1978800	1650500	2313700	2516800	1757600
Q9CXY6	ILF2_MOUSE	Interleukin enhancer-binding factor 2 (Nuclear factor of activated T-cells 45 kDa)	Ilf2 Nf45	1	14	14	14	108.68	739	62071000	7.79289	1303500000	9.11511	128940000	128480000	102670000	110940000	58372000	71761000	127560000	97479000	149350000	79477000	132080000	116390000	739	6074200	4641900	7111900	3784600	6289400	5542200	6140000	6118100	4889100	5283000	2779600	3417200	4299300	3450600	5045400	2562800	3055300	2863100	3706700	3868600	3400400	4861700	3297000
P31230	AIMP1_MOUSE	Aminoacyl tRNA synthase complex-interacting multifunctional protein 1 (Multisynthase complex auxiliary component p43) [Cleaved into: Endothelial monocyte-activating polypeptide 2 (EMAP-2) (Endothelial monocyte-activating polypeptide II) (EMAP-II) (Small inducible cytokine subfamily E member 1)]	Aimp1 Emap2 Scye1	1	9	9	9	82.521	740	61878000	7.79154	1361300000	9.13395	97226000	80945000	102510000	102790000	98512000	49562000	116880000	97840000	131790000	160890000	159050000	163330000	740	5312900	4447300	5990400	7313000	7229600	7424200	4419400	3679300	4659400	4672300	4477800	2252800	3343700	3329500	4325600	4099300	3878400	3974200	4120600	3641800	4072900	3385000	3616700
Q9D6Y9	GLGB_MOUSE	1,4-alpha-glucan-branching enzyme (EC 2.4.1.18) (Brancher enzyme) (Glycogen-branching enzyme)	Gbe1	1	23	23	23	117.97	741	61718000	7.79041	2777300000	9.44362	270120000	281550000	271550000	401010000	187980000	228260000	9136700	0	9912500	305370000	433840000	378590000	741	203040	0	220280	6786000	9640900	8413200	6002600	6256700	6034400	8911300	4177400	5072500	0	0	423660	12014000	13492000	7309400	7150000	8609700	12145000	17356000	7695700
Q9ESP1	SDF2L_MOUSE	Stromal cell-derived factor 2-like protein 1 (SDF2-like protein 1)	Sdf2l1	1	6	6	6	39.286	742	61717000	7.7904	1049200000	9.02086	78274000	35485000	75533000	126710000	124410000	75646000	102370000	77137000	91203000	49774000	100850000	111800000	742	6021600	4537500	5364900	2927900	5932200	6576800	4604400	2087300	4443100	7453400	7318200	4449800	3545300	3156300	3069000	1760800	2967400	3457300	2827300	2500200	2900800	3613100	3588200
Q8CHP8	PGP_MOUSE	Glycerol-3-phosphate phosphatase (G3PP) (EC 3.1.3.21) (Aspartate-based ubiquitous Mg(2+)-dependent phosphatase) (AUM) (EC 3.1.3.48) (Phosphoglycolate phosphatase) (PGP)	Pgp	1	8	8	8	56.612	743	61584000	7.78947	1231700000	9.0905	119910000	77673000	107770000	105690000	69729000	44008000	84321000	73353000	68581000	102080000	178660000	199900000	743	4216100	3667600	3429000	5104000	8933000	9995200	5995400	3883600	5388500	5284700	3486500	2200400	3012100	2924900	3318100	3092700	4583300	3869400	3323100	2987000	3102900	3852800	3459900
Q6S5C2	GNPTG_MOUSE	N-acetylglucosamine-1-phosphotransferase subunit gamma (GlcNAc-1-phosphotransferase subunit gamma) (M6PR domain-containing protein 1) (UDP-N-acetylglucosamine-1-phosphotransferase subunit gamma)	Gnptg Mdcp1	1	9	9	9	143.34	744	61180000	7.78661	856520000	8.93274	107780000	117030000	75154000	20107000	151160000	39159000	17727000	13230000	18676000	73327000	110200000	112970000	744	1266200	945020	1334000	5237700	7871100	8069200	7698900	8359200	5368100	1436200	10797000	2797100	1532800	1574100	1617600	2891200	1868300	2351600	3426000	3422900	2562300	1158600	4877800
Q9EQK5	MVP_MOUSE	Major vault protein (MVP)	Mvp	1	31	31	31	177.75	745	61098000	7.78603	3604800000	9.55688	316760000	293290000	298940000	344040000	344290000	273990000	460060000	86037000	77647000	290890000	388370000	429840000	745	7797600	1458300	1316000	4930300	6582500	7285500	5368800	4971000	5066800	5831200	5835400	4643900	4881500	4892400	5197400	11825000	11168000	10549000	10586000	9986000	11757000	14453000	15399000
Q99JI6	RAP1B_MOUSE	Ras-related protein Rap-1b (GTP-binding protein smg p21B)	Rap1b	2	9	9	9	33.559	746	61045000	7.78565	854630000	8.93178	109430000	83612000	107950000	35966000	31557000	15703000	82572000	101030000	83442000	43042000	71029000	89291000	746	5898000	7216500	5960100	3074400	5073500	6377900	7816300	5972300	7711000	2569000	2254000	1121600	2502700	2862800	2939900	1572600	1999800	1819100	2896300	2850500	2638900	1663400	1735500
Q9CQL1	MGN2_MOUSE	Protein mago nashi homolog 2	Magohb Magoh-rs1 Magoh2	2	6	6	6	43.972	747	60798000	7.78389	851180000	8.93002	90942000	96981000	104490000	56886000	31220000	42927000	40947000	50548000	92703000	60146000	79185000	104200000	747	2924800	3610500	6621700	4296100	5656100	7443000	6495900	6927200	7463600	4063300	2230000	3066200	2378000	2205400	3147600	2091400	2320900	2410800	2563500	1840300	2464800	2147500	2363600
P17427	AP2A2_MOUSE	AP-2 complex subunit alpha-2 (100 kDa coated vesicle protein C) (Adaptor protein complex AP-2 subunit alpha-2) (Adaptor-related protein complex 2 subunit alpha-2) (Alpha-adaptin C) (Alpha2-adaptin) (Clathrin assembly protein complex 2 alpha-C large chain) (Plasma membrane adaptor HA2/AP2 adaptin alpha C subunit)	Ap2a2 Adtab	1	29	29	24	194.93	748	60783000	7.78378	3890100000	9.58996	383750000	435050000	400740000	246020000	198990000	190710000	268660000	296710000	263000000	290650000	446750000	467120000	748	4197800	4636100	4109400	4541400	6980500	7298800	5996200	6797600	6261600	3844100	3109300	2979900	9773400	9458500	10008000	9470700	11352000	11209000	12875000	12370000	12286000	9737600	9618000
Q7TNC4	LC7L2_MOUSE	Putative RNA-binding protein Luc7-like 2 (CGI-74 homolog)	Luc7l2	1	9	9	6	67.854	749	60240000	7.77988	1506000000	9.17782	139170000	76013000	89637000	101330000	123090000	57915000	133560000	127550000	172930000	128800000	189900000	166100000	749	5342400	5102000	6917100	5152000	7596100	6644200	5566800	3040500	3585500	4053300	4923400	2316600	4356000	3520800	4991400	6309300	4713200	4434600	3465100	2618600	3425700	4011700	5612600
P46471	PRS7_MOUSE	26S proteasome regulatory subunit 7 (26S proteasome AAA-ATPase subunit RPT1) (Proteasome 26S subunit ATPase 2) (Protein MSS1)	Psmc2 Mss1	1	20	20	20	130.75	750	59962000	7.77788	2338500000	9.36894	189680000	175390000	172800000	114870000	92078000	71659000	240050000	235720000	246350000	233560000	281200000	285160000	750	6155000	6044000	6316700	5988800	7210400	7311800	4863500	4497100	4430700	2945400	2361000	1837400	7028900	7500600	7734800	6458700	7492700	6734300	6275600	6168300	7151000	4424700	4992000
Q91XL3	UXS1_MOUSE	UDP-glucuronic acid decarboxylase 1 (EC 4.1.1.35) (UDP-glucuronate decarboxylase 1) (UGD) (UXS-1)	Uxs1	1	10	10	10	77.105	751	59877000	7.77726	1197500000	9.07828	193460000	136260000	135000000	34425000	48199000	24071000	86472000	99834000	90119000	81107000	80858000	187740000	751	4323600	4991700	4506000	4055300	4042900	9386900	9673000	6813100	6750000	1721200	2409900	1203600	3325900	3499600	3361700	2226000	2261700	3121400	4159000	3986300	3945700	2557500	2718200
O70194	EIF3D_MOUSE	Eukaryotic translation initiation factor 3 subunit D (eIF3d) (Eukaryotic translation initiation factor 3 subunit 7) (eIF-3-zeta) (eIF3 p66)	Eif3d Eif3s7	1	16	16	16	203.03	752	59753000	7.77636	2031600000	9.30784	136510000	156030000	119610000	82115000	62782000	46588000	244150000	260000000	265860000	150860000	227100000	280020000	752	7180900	7647200	7819300	4437000	6679400	8235800	4015000	4589000	3517900	2415100	1846500	1370200	6607100	6967000	6933100	5665000	5030200	5889300	5067900	5458400	5536600	4925600	3640300
Q921F2	TADBP_MOUSE	TAR DNA-binding protein 43 (TDP-43)	Tardbp Tdp43	1	11	11	11	100.07	753	59470000	7.7743	1367800000	9.13602	145050000	143370000	167030000	72315000	76126000	66329000	83443000	109880000	89234000	123500000	122250000	169290000	753	3627900	4777200	3879700	5369600	5315100	7360500	6306400	6233500	7262300	3144100	3309800	2883800	3765900	3226000	3404600	4541300	4310200	3382900	4206700	4288900	4595200	2905900	3401400
Q8BV57	SRCRL_MOUSE	Soluble scavenger receptor cysteine-rich domain-containing protein SSC5D (Scavenger receptor cysteine-rich domain-containing protein LOC284297 homolog)	Ssc5d S5D-SRCRB	1	21	21	21	307.87	754	59131000	7.77182	3607000000	9.55715	658630000	672500000	467510000	81657000	530580000	215540000	0	2752500	9729500	207240000	284340000	476520000	754	0	45123	159500	3397300	4661200	7811700	10797000	11025000	7664000	1338600	8698100	3533500	0	0	472450	7632000	6505400	12633000	18088000	19012000	15386000	3716700	24963000
Q80XC6	NRDE2_MOUSE	Protein NRDE2 homolog	Nrde2	1	2	2	2	1.5961	755	59035000	7.77111	4250500000	9.62844	129890000	224240000	1867800000	64151000	105450000	53496000	310270000	412690000	792400000	57754000	72432000	159960000	755	4309400	5731700	11006000	802140	1006000	2221600	1804100	3114500	25941000	890990	1464500	743000	10634000	18045000	27710000	3033100	2260100	4437000	3278500	6900400	26827000	2897700	8822300
P59325	IF5_MOUSE	Eukaryotic translation initiation factor 5 (eIF-5)	Eif5	1	17	17	17	53.178	756	58987000	7.77076	1769600000	9.24788	110750000	129320000	124130000	30153000	35439000	28303000	264850000	193080000	185560000	143340000	233500000	291200000	756	8828500	6436100	6185200	4778000	7783200	9706500	3691600	4310600	4137600	1005100	1181300	943440	7935400	6546200	6096500	4790500	5268300	4901900	3270800	3519900	3665000	2486100	2929400
Q9D8S9	BOLA1_MOUSE	BolA-like protein 1	Bola1	1	5	5	5	11.559	757	58869000	7.76989	647560000	8.81128	57956000	62044000	70486000	35288000	46084000	21637000	37084000	38487000	36230000	74826000	60207000	107240000	757	3371200	3498800	3293600	6802300	5473300	9748700	5268700	5640400	6407800	3208000	4189500	1967000	1239800	1385500	1306400	2752600	1622600	1821500	1525000	1378900	2412500	1582000	2570600
P50396	GDIA_MOUSE	Rab GDP dissociation inhibitor alpha (Rab GDI alpha) (Guanosine diphosphate dissociation inhibitor 1) (GDI-1)	Gdi1 Rabgdia	1	19	12	12	132.88	758	58601000	7.76791	1699400000	9.2303	65249000	268030000	125670000	116920000	79396000	95278000	141840000	174980000	135610000	110300000	185900000	198820000	758	4890900	6033700	4676100	3803500	6410400	6855700	2250000	9242600	4333400	4031800	2737800	3285500	3489300	3881800	3603700	3185000	5162500	5599300	3567200	6738700	5401800	5500500	4437800
P41731	CD63_MOUSE	CD63 antigen (CD antigen CD63)	Cd63	1	2	2	2	20.384	759	58481000	7.76701	584810000	8.76701	0	0	65623000	40986000	32862000	24863000	61344000	55338000	74328000	92903000	64321000	72246000	759	6134400	5533800	7432800	9290300	6432100	7224600	0	0	6562300	4098600	3286200	2486300	0	0	0	2182000	0	0	0	0	0	2021600	1482100
Q6ZWM4	LSM8_MOUSE	U6 snRNA-associated Sm-like protein LSm8	Lsm8	1	3	3	3	35.296	760	58353000	7.76606	408470000	8.61116	7285800	53101000	46693000	21895000	35928000	9687200	49354000	0	35108000	28609000	46495000	73428000	760	7050600	0	5015400	4087100	6642200	10490000	1040800	7585800	6670400	3127900	5132600	1383900	1562900	0	0	1021800	1244700	1728500	0	1498100	1617100	1199200	1375400
P58774	TPM2_MOUSE	Tropomyosin beta chain (Beta-tropomyosin) (Tropomyosin-2)	Tpm2 Tpm-2	2	25	12	11	130.86	761	58126000	7.76437	1743800000	9.2415	158860000	194550000	169960000	126180000	116540000	91286000	108870000	110610000	91675000	136530000	187320000	172000000	761	3628900	3687000	3055800	4551100	6243900	5733200	5295200	6484900	5665500	4205900	3884800	3042900	4432100	5158200	4855600	6153500	6246200	6155900	6080900	6091100	6098900	6283500	5830200
P62077	TIM8B_MOUSE	Mitochondrial import inner membrane translocase subunit Tim8 B (Deafness dystonia protein 2 homolog)	Timm8b Ddp2 Tim8b	1	4	4	4	8.4788	762	58122000	7.76434	348730000	8.54249	0	0	11701000	48914000	42591000	25292000	29064000	24046000	31408000	41066000	54476000	40174000	762	4843900	4007700	5234700	6844300	9079300	6695700	0	0	1950200	8152300	7098500	4215300	948280	1046600	1055900	1459300	1658700	856000	0	0	0	2111500	1976700
P21550	ENOB_MOUSE	Beta-enolase (EC 4.2.1.11) (2-phospho-D-glycerate hydro-lyase) (Enolase 3) (Muscle-specific enolase) (MSE) (Skeletal muscle enolase)	Eno3 Eno-3	1	21	16	14	78.818	763	57536000	7.75994	1726100000	9.23707	131730000	95950000	108130000	48458000	70651000	39955000	196830000	210150000	120370000	126120000	195980000	245100000	763	6560900	7005100	4012200	4204100	6532700	8169900	4391100	3198300	3604300	1615300	2355000	1331800	7311100	7815600	5515500	4828900	6567600	7028100	4333800	4143600	4331700	2426800	3278900
P20033	PDGFA_MOUSE	Platelet-derived growth factor subunit A (PDGF subunit A) (PDGF-1) (Platelet-derived growth factor A chain) (Platelet-derived growth factor alpha polypeptide)	Pdgfa	1	6	6	6	14.9	764	57460000	7.75937	861900000	8.93546	59050000	45408000	89480000	86383000	50310000	29773000	61964000	46835000	43778000	106100000	123780000	119040000	764	4130900	3122300	2918500	7073500	8251900	7935800	3936700	3027200	5965300	5758800	3354000	1984900	2131200	1351300	2135400	2603900	3592100	2513100	3123300	2237300	2650600	2599100	2512600
P16460	ASSY_MOUSE	Argininosuccinate synthase (EC 6.3.4.5) (Citrulline--aspartate ligase)	Ass1 Ass	1	13	13	13	165.57	765	57365000	7.75865	1835700000	9.2638	136310000	147710000	118970000	78696000	42999000	50274000	234220000	215430000	191250000	143220000	270080000	206510000	765	7319500	6732100	5976500	4475600	8440100	6453300	4259700	4616000	3717800	2459300	1343700	1571000	6440400	6233000	6024800	5405700	6070000	5483900	3394600	5035100	4299600	3764000	3226200
P61759	PFD3_MOUSE	Prefoldin subunit 3 (von Hippel-Lindau-binding protein 1) (VBP-1) (VHL-binding protein 1)	Vbp1 Pfdn3	1	8	8	8	33.053	766	57096000	7.75661	970640000	8.98706	90754000	88379000	73443000	45575000	40001000	31570000	83574000	91868000	76019000	68747000	122680000	158030000	766	4916100	5404000	4471700	4044000	7216800	9295600	5338400	5198700	4320200	2680900	2353000	1857100	2724800	3136400	2684200	2055400	3766600	3527300	2561400	2313600	1980800	2171200	2126600
Q9Z1F9	SAE2_MOUSE	SUMO-activating enzyme subunit 2 (EC 2.3.2.-) (Anthracycline-associated resistance ARX) (Ubiquitin-like 1-activating enzyme E1B) (Ubiquitin-like modifier-activating enzyme 2)	Uba2 Sae2 Uble1b	1	19	19	19	164.8	767	57039000	7.75617	2452700000	9.38964	177390000	154890000	200070000	104260000	75912000	79274000	291130000	290630000	262100000	200930000	272010000	344090000	767	6770500	6758900	6095300	4672800	6325800	8002100	4125200	3602000	4652800	2424600	1765400	1843600	8038200	7948100	9156900	8329300	6717100	6762000	5682000	5499000	6102100	5397300	4987000
Q03958	PFD6_MOUSE	Prefoldin subunit 6 (Protein Ke2)	Pfdn6 H2-Ke2 Pfd6	1	6	6	6	43.159	768	56868000	7.75487	796150000	8.90099	54464000	35904000	50212000	36205000	32887000	20891000	66637000	52406000	71251000	57798000	127300000	190200000	768	4759800	3743300	5089300	4128400	9092900	13585000	3890300	2564600	3586600	2586100	2349100	1492200	2515500	1986800	1834800	2142000	2506300	2391100	1866200	2105500	1797500	2222300	2114900
Q64695	EPCR_MOUSE	Endothelial protein C receptor (Activated protein C receptor) (APC receptor) (Centrocyclin) (Centrosomal protein CCD41) (Endothelial cell protein C receptor) (CD antigen CD201)	Procr Epcr	1	2	2	2	17.737	769	56799000	7.75434	511190000	8.70858	55953000	71184000	38220000	27837000	64445000	27564000	27056000	22771000	23298000	22509000	50807000	79546000	769	3006200	2530100	2588600	2501000	5645200	8838500	6217000	7909400	4246700	3093000	7160500	3062700	879150	757530	836790	805790	1519800	1673900	1501800	1946700	1002000	1321100	3281700
P54822	PUR8_MOUSE	Adenylosuccinate lyase (ASL) (EC 4.3.2.2) (Adenylosuccinase) (ASase)	Adsl Adl	1	15	15	15	85.493	770	56671000	7.75336	1983500000	9.29743	180860000	145660000	199170000	128760000	83561000	63474000	179720000	183720000	140230000	152480000	242230000	283610000	770	5134800	5249100	4006600	4356500	6921000	8103300	5167600	4161600	5690600	3678900	2387400	1813500	6258400	6324100	5379300	5791000	5836600	5850500	4677600	4894000	6145200	5221900	4632000
Q8K003	TMA7_MOUSE	Translation machinery-associated protein 7 (Coiled-coil domain-containing protein 72)	Tma7 Ccdc72	1	3	3	3	8.0913	771	56608000	7.75288	169820000	8.22999	0	0	0	12366000	10103000	6763800	28615000	20307000	22989000	30639000	38040000	0	771	9538300	6769200	7662800	10213000	12680000	0	0	0	0	4122100	3367800	2254600	0	0	0	1256700	965390	0	0	0	0	0	0
[truncated: 1,422 more rows]
[truncated: 1 more columns]
